# Supplementary material
Source: HighWire-hosted journal article supplement (https://bjsm.bmj.com/content/bjsports-2016-096515)
Supplement: inline-supplementary-material-1 [file inline-supplementary-material-1.pdf]

## Appendix 1: Search Strategy for CINAHL

|                                                                                                                                                                                                                                                                                                                                                                                                                                                                                                                          |                                                                                                                                                                                                                                                                                                                                                                                          |
|--------------------------------------------------------------------------------------------------------------------------------------------------------------------------------------------------------------------------------------------------------------------------------------------------------------------------------------------------------------------------------------------------------------------------------------------------------------------------------------------------------------------------|------------------------------------------------------------------------------------------------------------------------------------------------------------------------------------------------------------------------------------------------------------------------------------------------------------------------------------------------------------------------------------------|
| (( (MH "Random Assignment") or (MH "Random Sample+") or (MH "Crossover Design") or (MH "Clinical Trials+") or (MH "Comparative Studies") or (MH "Control (Research)+") or (MH "Control Group") or (MH "Factorial Design") or (MH "Quasi-Experimental Studies+") or (MH "Placebos") or (MH "Meta Analysis") or (MH "Sample Size") or (MH "Research, Nursing") or (MH "Research Question") or (MH "Research Methodology+") or (MH "Evaluation Research+") or (MH "Concurrent Prospective Studies") or (MH "Prospective ... | #14 AND #15                                                                                                                                                                                                                                                                                                                                                                              |
| ( (MH "Random Assignment") or (MH "Random Sample+") or (MH "Crossover Design") or (MH "Clinical Trials+") or (MH "Comparative Studies") or (MH "Control (Research)+") or (MH "Control Group") or (MH "Factorial Design") or (MH "Quasi-Experimental Studies+") or (MH "Placebos") or (MH "Meta Analysis") or (MH "Sample Size") or (MH "Research, Nursing") or (MH "Research Question") or (MH "Research Methodology+") or (MH "Evaluation Research+") or (MH "Concurrent Prospective Studies") or (MH "Prospective ...  | #1 OR #2 OR #3 OR #4 OR #5 OR #6 #7 OR #8 OR #9 OR #10 OR #11 OR #12                                                                                                                                                                                                                                                                                                                     |
| (rotator cuff NOT ("rotator cuff" n5 (surgery OR arthroscopy OR acromioplasty ))) AND (S1 OR S2 OR S3 OR S4 OR S5 OR S6 OR S7 OR S8 OR S9 OR S10 OR S11 OR S12)                                                                                                                                                                                                                                                                                                                                                          | 'crossover procedure':de OR 'double-blind procedure':de OR 'randomized controlled trial':de OR 'single-blind procedure':de OR random*:de,ab,ti OR factorial*:de,ab,ti OR crossover*:de,ab,ti OR (cross NEXT/1 over*):de,ab,ti OR placebo*:de,ab,ti OR (doubl* NEAR/1 blind*):de,ab,ti OR (singl* NEAR/1 blind*):de,ab,ti OR assign*:de,ab,ti OR allocat*:de,ab,ti OR volunteer*:de,ab,ti |
| rotator cuff NOT ("rotator cuff" n5 (surgery OR arthroscopy OR acromioplasty ))                                                                                                                                                                                                                                                                                                                                                                                                                                          | rotator AND cuff NOT rotator cuff NEAR/5 (surgery OR arthroscopy OR acromioplasty) AND (s1 OR s2 OR s3 OR s4 OR s5 OR s6 OR s7 OR s8 OR s9 OR s10 OR s11 OR s12)                                                                                                                                                                                                                         |
| SiS shoulder                                                                                                                                                                                                                                                                                                                                                                                                                                                                                                             | rotator AND cuff NOT rotator cuff NEAR/5 (surgery OR arthroscopy OR acromioplasty)                                                                                                                                                                                                                                                                                                       |
| (subacromial OR sub-acromial) n5 rotator cuff disease                                                                                                                                                                                                                                                                                                                                                                                                                                                                    | Rotator AND cuff NOT "rotator cuff NEAR5 (surgery OR arthroscopy OR acromioplasty)                                                                                                                                                                                                                                                                                                       |
| (subacromial OR sub-acromial) n5 tendinitis                                                                                                                                                                                                                                                                                                                                                                                                                                                                              | SiS AND shoulder                                                                                                                                                                                                                                                                                                                                                                         |
| (subacromial OR sub-acromial) n5 bursitis                                                                                                                                                                                                                                                                                                                                                                                                                                                                                | (subacromial OR sub acromial) NEAR/5 rotator AND cuff AND disease                                                                                                                                                                                                                                                                                                                        |
| painful-arc syndrom                                                                                                                                                                                                                                                                                                                                                                                                                                                                                                      | (subacromial OR sub acromial) NEAR/5 tendinitis                                                                                                                                                                                                                                                                                                                                          |
| painful arc syndrom                                                                                                                                                                                                                                                                                                                                                                                                                                                                                                      | (subacromial OR sub acromial) NEAR/5 bursitis                                                                                                                                                                                                                                                                                                                                            |
| (subacromial OR sub-acromial) n5 pain                                                                                                                                                                                                                                                                                                                                                                                                                                                                                    | painful arc AND syndrome                                                                                                                                                                                                                                                                                                                                                                 |

|                                                          |                                                              |
|----------------------------------------------------------|--------------------------------------------------------------|
| sub-acromial n5 (conflicts OR conflict)                  | (subacromial OR sub acromial) NEAR/5 Pain                    |
| (subacromial OR sub-acromial) n5 (conflicts OR conflict) | (subacromial OR sub acromial) NEAR/5 (conflicts OR conflict) |
| (subacromial OR sub-acromial) n5 impingement             | (subacromial OR sub acromial) NEAR/5 impingement             |
| TX shoulder n5 impingement                               | Shoulder NEAR/5 Impingement                                  |
