# Supplementary material
Source: HighWire-hosted journal article supplement (https://bjsm.bmj.com/content/bjsports-2016-096515)
Supplement: inline-supplementary-material-3 [file inline-supplementary-material-3.pdf]

**Appendix 3a** Summary effect sizes, pain and function, longest follow-up and shortest follow-up

| Comparisons | Pain, longest follow-up                   |                              |                |                  | Pain, shortest follow-up |                              |                |                  | Function, longest follow-up |                              |                |                  | Function, shortest follow-up |                              |                |                  |
|-------------|-------------------------------------------|------------------------------|----------------|------------------|--------------------------|------------------------------|----------------|------------------|-----------------------------|------------------------------|----------------|------------------|------------------------------|------------------------------|----------------|------------------|
|             | SMD (95%CI)                               | N                            | I <sup>2</sup> | G                | SMD (95%CI)              | N                            | I <sup>2</sup> | G                | SMD (95%CI)                 | N                            | I <sup>2</sup> | G                | SMD (95%CI)                  | N                            | I <sup>2</sup> | G                |
|             | Negative values favour left-hand therapy. | Comparisons/Trial (Patients) |                | R<br>A<br>D<br>E |                          | Comparisons/Trial (Patients) |                | R<br>A<br>D<br>E |                             | Comparisons/Trial (Patients) |                | R<br>A<br>D<br>E |                              | Comparisons/Trial (Patients) |                | R<br>A<br>D<br>E |

**Medication**

|                                                                |                             |              |    |   |                              |              |    |   |                             |              |    |   |                              |              |    |   |
|----------------------------------------------------------------|-----------------------------|--------------|----|---|------------------------------|--------------|----|---|-----------------------------|--------------|----|---|------------------------------|--------------|----|---|
| Corticosteroids vs Control                                     | <b>-0.65 (-1.04, -0.26)</b> | 8/6 (372)    | 66 | + | <b>-0.99 (-1.42, -0.57)</b>  | 8/6 (386)    | 70 | + | <b>-0.56 (-1.06, -0.05)</b> | 7/5 (362)    | 80 | + | <b>-0.65 (-1.01, -0.29)</b>  | 8/6 (413)    | 65 | + |
| Corticosteroids vs Active Control                              | -0.03 (-0.19, 0.12)         | 22/20 (1354) | 46 | + | <b>-0.25 (-0.46, -0.05)</b>  | 22/20 (1394) | 69 | + | -0.04 (-0.17, 0.08)         | 19/18 (1505) | 30 | + | -0.13 (-0.28, 0.01)          | 19/18 (1523) | 45 | + |
| Corticosteroids vs NSAID                                       | 0.51 (-0.44, 1.45)          | 4/4 (142)    | 86 | + | 0.51 (-0.44, 1.45)           | 4/4 (142)    | 86 | + | -0.04 (-0.48, 0.56)         | 5/5 (198)    | 70 | + | 0.53 (-0.04, 1.10)           | 5/5 (198)    | 74 | + |
| Local CS vs Systemic CS                                        | -0.38 (-0.76, 0.01)         | 1 (106)      | NA | + | -0.24 (-0.62, 0.14)          | 1 (106)      | NA | + | -0.14 (-0.52, 0.25)         | 1 (106)      | NA | + | 0.17 (-0.22, 0.55)           | 1 (104)      | NA | + |
| Ultrasound Guided Corticosteroid Injection vs Blind Injections | <b>-0.51 (-0.89, -0.13)</b> | 6/5 (298)    | 61 | + | <b>-0.54 (-0.92, -0.16)</b>  | 6/5 (298)    | 61 | + | <b>-0.43 (-0.71, -0.15)</b> | 6/5 (298)    | 20 | + | <b>-0.44 (-0.70, -0.17)</b>  | 6/5 (298)    | 21 | + |
| Corticosteroid plus NSAID versus NSAID                         | <b>-0.76 (-1.26, -0.26)</b> | 1 (66)       | NA | + | <b>-0.76 (-1.26, -0.26)*</b> | 1 (66)       | NA | + | <b>-0.82 (-1.32, -0.31)</b> | 1 (66)       | NA | + | <b>-0.82 (-1.32, -0.31)*</b> | 1 (66)       | NA | + |

| Comparisons                                                               | Pain, longest follow-up                         |                                 |                |                  | Pain, shortest follow-up    |                                 |                |                  | Function, longest follow-up |                                 |                |                  | Function, shortest follow-up |                                 |                |                  |
|---------------------------------------------------------------------------|-------------------------------------------------|---------------------------------|----------------|------------------|-----------------------------|---------------------------------|----------------|------------------|-----------------------------|---------------------------------|----------------|------------------|------------------------------|---------------------------------|----------------|------------------|
|                                                                           | SMD (95%CI)                                     | N                               | I <sup>2</sup> | G                | SMD (95%CI)                 | N                               | I <sup>2</sup> | G                | SMD (95%CI)                 | N                               | I <sup>2</sup> | G                | SMD (95%CI)                  | N                               | I <sup>2</sup> | G                |
|                                                                           | Negative values<br>favour left-hand<br>therapy. | Comparisons/Trial<br>(Patients) |                | R<br>A<br>D<br>E |                             | Comparisons/Trial<br>(Patients) |                | R<br>A<br>D<br>E |                             | Comparisons/Trial<br>(Patients) |                | R<br>A<br>D<br>E |                              | Comparisons/Trial<br>(Patients) |                | R<br>A<br>D<br>E |
| Corticosteroid plus NSAID<br>versus Kinesiotaping plus<br>NSAID           | 0.00 (-0.48, 0.48)                              | 1 (66)                          | NA             | +                | 0.00 (-0.48, 0.48)          | 1 (66)                          | NA             | +                | 0.40 (-0.08, 0.89)          | 1 (66)                          | NA             | +                | 0.40 (-0.08, 0.89)*          | 1 (66)                          | NA             | +                |
| Ketoprofen plus Lidocaine<br>Phonophoresis vs<br>Ketoprofen Phonophoresis | <b>-0.55 (-1.03, -0.07)</b>                     | 1 (70)                          | NA             | +                | -0.09 [-0.56, 0.38]         | 1(70)                           | NA             | +                | 0.09 (-0.38, 0.56)          | 1 (70)                          | NA             | +                | 0.09 (-0.38, 0.56)*          | 1 (70)                          | NA             | +                |
| Celecoxib or Naproxen vs<br>Placebo                                       | <b>-0.29 (-0.53, -0.05)</b>                     | 2/1 (306)                       | 0              | +                | <b>-2.62 (-4.32, -0.91)</b> | <b>2/1 (306)</b>                | 96             | +                | No Study                    |                                 |                |                  | No Study                     |                                 |                |                  |
| Topical Glyceryl Trinitrate<br>Patch versus Placebo Patch                 | <b>-0.93 (-1.52, -0.33)</b>                     | 1 (48)                          | NA             | +                | -0.11 (-0.66, 0.44)         | 1 (51)                          | NA             | +                | No Study                    |                                 |                |                  | No Study                     |                                 |                |                  |
| Naprosyn + Exercise versus<br>Pre-cut Tape plus exercise                  | -0.30 (-0.80, 0.20)                             | 1 (62)                          | NA             | +                | -0.30 (-0.80, 0.20)*        | 1 (62)                          | NA             | +                | 0.12 (-0.35, 0.59)          | 1 (71)                          | NA             | +                | 0.12 (-0.35, 0.59)*          | 1 (71)                          | NA             | +                |
| Local Anaesthetics versus<br>Corticosteroids                              | -0.04 (-0.25, 0.32)                             | 5/4 (194)                       | 0              | +                | <b>0.45 (0.17, 0.73)</b>    | <b>5/4 (207)</b>                | 0              | +                | 0.06 (-0.21, 0.33)          | 5/4 (218)                       | 0              | +                | 0.24 (-0.03, 0.51)           | 5/4 (218)                       | 0              | +                |
| Local Anesthetic Patch                                                    | -0.14 (-0.52, 0.24)                             | 2/2 (106)                       | 0              | +                | -0.16 (-0.54, 0.22)         | 2/2 (106)                       | 0              | +                | No Study                    |                                 |                |                  | No Study                     |                                 |                |                  |

| Comparisons                          | Pain, longest follow-up                   |                              |                |                  | Pain, shortest follow-up     |                              |                |                  | Function, longest follow-up |                              |                |                  | Function, shortest follow-up |                              |                |                  |  |
|--------------------------------------|-------------------------------------------|------------------------------|----------------|------------------|------------------------------|------------------------------|----------------|------------------|-----------------------------|------------------------------|----------------|------------------|------------------------------|------------------------------|----------------|------------------|--|
|                                      | SMD (95%CI)                               | N                            | I <sup>2</sup> | G                | SMD (95%CI)                  | N                            | I <sup>2</sup> | G                | SMD (95%CI)                 | N                            | I <sup>2</sup> | G                | SMD (95%CI)                  | N                            | I <sup>2</sup> | G                |  |
|                                      | Negative values favour left-hand therapy. | Comparisons/Trial (Patients) |                | R<br>A<br>D<br>E |                              | Comparisons/Trial (Patients) |                | R<br>A<br>D<br>E |                             | Comparisons/Trial (Patients) |                | R<br>A<br>D<br>E |                              | Comparisons/Trial (Patients) |                | R<br>A<br>D<br>E |  |
| versus Corticosteroids               |                                           |                              |                |                  |                              |                              |                |                  |                             |                              |                |                  |                              |                              |                |                  |  |
| Diclofenac versus Placebo            | <b>-0.70 (-1.34, -0.06)</b>               | 1 (40)                       | NA             | +                | <b>-0.70 (-1.34, -0.06)*</b> | 1 (40)                       | NA             | +                | <b>-1.15 (-1.82, -0.47)</b> | 1(40)                        | NA             | +                | <b>-1.15 (-1.82, -0.47)*</b> | 1 (40)                       | NA             | +                |  |
| <b>Exercise</b>                      |                                           |                              |                |                  |                              |                              |                |                  |                             |                              |                |                  |                              |                              |                |                  |  |
| Exercise vs Nothing                  | <b>-0.94 (-1.69, -0.19)</b>               | 5/5 (189)                    | 80             | +                | <b>-0.94 (-1.69, -0.19)*</b> | 5/5 (189)                    | 80             | +                | <b>-0.57 (-0.85, -0.29)</b> | 4/4 (202)                    | 0              | +                | -1.29 (-2.61, 0.03)          | 4/4 (202)                    | 94             | +                |  |
| Exercise vs Passive Physical Therapy | -0.12 (-0.60, 0.36)                       | 5/5 (183)                    | 58             | +                | -0.05 (-0.66, 0.55)          | 4/4 (181)                    | 74             | +                | -0.56 (-1.55, 0.42)         | 6/6 (210)                    | 91             | +                | -0.38 (-1.29, 0.52)*         | 6/6 (249)                    | 91             | +                |  |
| Exercise vs Surgery                  | 0.13 (-0.52, 0.78)                        | 3/3 (291)                    | 87             | +                | 0.25 (-0.25, 0.74)           | 3/3 (321)                    | 80             | +                | 0.01 (-0.19, 0.21)          | 4/4 (379)                    | 0              | +                | 0.03 (-0.17, 0.23)           | 4/4 (402)                    | 0              | +                |  |
| Specific vs Non Specific Exercise    | <b>-0.65 (-0.99, -0.32)</b>               | 2/2 (145)                    | 0              | +                | <b>-0.54 (-0.97, -0.11)</b>  | 2/2 (159)                    | 44             | +                | <b>-0.68 (-1.26, -0.10)</b> | 2/2 (145)                    | 52             | +                | <b>-0.82 (-1.35, -0.28)</b>  | 2/2 (159)                    | 14             | +                |  |
| Exercise vs ESWT                     | -0.09 (-0.49, 0.32)                       | 1 (94)                       | NA             | +                | -0.16 (-0.55, 0.22)          | 1 (104)                      | NA             | +                | -0.15 (-0.56, 0.25)         | 1 (94)                       | NA             | +                | -0.34 (-0.73, 0.05)          | 1 (102)                      | NA             | +                |  |

| Comparisons                                                     | Pain, longest follow-up                         |                                 |                |                  | Pain, shortest follow-up     |                                 |                |                  | Function, longest follow-up |                                 |                |                  | Function, shortest follow-up |                                 |                |                  |
|-----------------------------------------------------------------|-------------------------------------------------|---------------------------------|----------------|------------------|------------------------------|---------------------------------|----------------|------------------|-----------------------------|---------------------------------|----------------|------------------|------------------------------|---------------------------------|----------------|------------------|
|                                                                 | SMD (95%CI)                                     | N                               | I <sup>2</sup> | G                | SMD (95%CI)                  | N                               | I <sup>2</sup> | G                | SMD (95%CI)                 | N                               | I <sup>2</sup> | G                | SMD (95%CI)                  | N                               | I <sup>2</sup> | G                |
|                                                                 | Negative values<br>favour left-hand<br>therapy. | Comparisons/Trial<br>(Patients) |                | R<br>A<br>D<br>E |                              | Comparisons/Trial<br>(Patients) |                | R<br>A<br>D<br>E |                             | Comparisons/Trial<br>(Patients) |                | R<br>A<br>D<br>E |                              | Comparisons/Trial<br>(Patients) |                | R<br>A<br>D<br>E |
| Land Based vs Water Based                                       | <b>0.80 (0.26, 1.34)</b>                        | 1 (57)                          | NA             | +                | <b>0.80 (0.26, 1.34)*</b>    | 1 (57)                          | NA             | +                | <b>1.01 (0.45, 1.56)</b>    | 1 (57)                          | NA             | +                | <b>1.01 (0.45, 1.56)*</b>    | 1 (57)                          | NA             | +                |
| Traditional Exercise vs Neurocognitiv Exercise                  | 0.16 (-0.40, 0.73)                              | 1 (48)                          | NA             | +                | -0.10 (-0.67, 0.46)          | 1 (48)                          | NA             | +                | -0.36 (-0.93, 0.21)         | 1 (48)                          | NA             | +                | -0.05 (-0.61, 0.52)          | 1 (48)                          | NA             | +                |
| Scapular Oriented Motor Control vs Exercise plus Manual Therapy | -0.27 (-0.81, 0.27)                             | 3/3 (103)                       | 44             | +                | -0.27 (-0.81, 0.27)*         | 3/3 (103)                       | 44             | +                | -0.01 (-0.89, 0.87)         | 3/3 (103)                       | 78             |                  | -0.01 (-0.89, 0.87)*         | 3/3 (103)                       | 78             | +                |
| Home Based Exercise vs Occupational Therapy                     | -0.20 (-0.84, 0.45)                             | 1 (38)                          | NA             | +                | -0.20 (-0.84, 0.45)*         | 1 (38)                          | NA             | +                | 0.15 (-0.49, 0.79)          | 1 (39)                          | NA             | +                | 0.15 (-0.49, 0.79)*          | 1 (39)                          | NA             | +                |
| High Dose vs Low Dose Exercise                                  | -0.47 (-1.04, 0.10)                             | 1 (49)                          | NA             | +                | -0.06 (-0.58, 0.47)          | 1 (56)                          | NA             | +                | -0.53 (-1.10, 0.04)         | 1 (49)                          | NA             | +                | <b>-1.29 (-1.87, -0.71)</b>  | 1 (56)                          | NA             | +                |
| Motor imagery plus Exercise vs Exercise                         | <b>-1.42 (-2.56, -0.29)</b>                     | 1 (16)                          | NA             | +                | <b>-1.42 (-2.56, -0.29)*</b> | 1 (16)                          | NA             | +                | -1.05 (-2.11, 0.02)         | 1 (16)                          | NA             | +                | -1.05 (-2.11, 0.02)*         | 1 (16)                          | NA             | +                |
| Exercises below 90° versus above                                | -0.36 (-1.09, 0.36)                             | 1 (30)                          | NA             | +                | -0.71 (-1.45, 0.03)          | 1 (30)                          | NA             | +                | No Study                    |                                 |                |                  | No Study                     |                                 |                |                  |

| Comparisons                                                               | Pain, longest follow-up                         |                                 |                |                  | Pain, shortest follow-up |                                 |                |                  | Function, longest follow-up |                                 |                |                  | Function, shortest follow-up |                                 |                |                  |
|---------------------------------------------------------------------------|-------------------------------------------------|---------------------------------|----------------|------------------|--------------------------|---------------------------------|----------------|------------------|-----------------------------|---------------------------------|----------------|------------------|------------------------------|---------------------------------|----------------|------------------|
|                                                                           | SMD (95%CI)                                     | N                               | I <sup>2</sup> | G                | SMD (95%CI)              | N                               | I <sup>2</sup> | G                | SMD (95%CI)                 | N                               | I <sup>2</sup> | G                | SMD (95%CI)                  | N                               | I <sup>2</sup> | G                |
|                                                                           | Negative values<br>favour left-hand<br>therapy. | Comparisons/Trial<br>(Patients) |                | R<br>A<br>D<br>E |                          | Comparisons/Trial<br>(Patients) |                | R<br>A<br>D<br>E |                             | Comparisons/Trial<br>(Patients) |                | R<br>A<br>D<br>E |                              | Comparisons/Trial<br>(Patients) |                | R<br>A<br>D<br>E |
| Physiotherapy plus<br>Proprioception versus<br>Physiotherapy              | <b>0.55 (0.03, 1.06)</b>                        | 1 (61)                          | NA             | +                | -0.14 (-0.64, 0.36)      | 1 (61)                          | NA             | +                | <b>0.63 (0.11, 1.14)</b>    | 1 (61)                          | NA             | +                | -0.47 (-0.98, 0.04)          | 1 (61)                          | NA             | +                |
| Supervised vs Home-Based<br>Exercise                                      | -0.09 (-0.68, 0.50)                             | 1 (44)                          | NA             | +                | -0.09 (-0.68, 0.50)*     | 1 (44)                          | NA             | +                | -0.14 (-0.77, 0.49)         | 1 (39)                          | NA             | +                | 0.00 (-0.59, 0.59)           | 1 (44)                          | NA             | +                |
| Weighted Pendulum<br>Exercises versus<br>Unweighted Pendulum<br>Exercises | -0.12 (-0.80, 0.55)                             | 1 (34)                          | NA             | +                | -0.12 (-0.80, 0.55)*     | 1 (34)                          | NA             | +                | -0.39 (-1.07, 0.29)         | 1 (34)                          | NA             | +                | -0.39 (-1.07, 0.29)*         | 1 (34)                          | NA             | +                |
| Eccentric versus<br>Concentric Exercises                                  | 0.09 (-0.57, 0.75)                              | 1 (36)                          | NA             | +                | -0.64 (-1.33, 0.06)      | 1 (34)                          | NA             | +                | -0.47 (-1.14, 0.20)         | 1 (30)                          | NA             | +                | -0.02 (-0.70, 0.65)*         | 1 (34)                          | NA             | +                |
| Exercise plus ESWT versus<br>ESWT                                         | <b>-2.77 (-3.81, -1.73)</b>                     | 1 (30)                          | NA             | +                | -0.17 (-0.89, 0.54)      | 1 (38)                          | NA             | +                | <b>-2.42 (-3.40, -1.45)</b> | 1 (30)                          | NA             | +                | 0.18 (-0.89, 0.54)           | 1 (39)                          | NA             | +                |
| Clinic Based vs Work-Place<br>Based                                       | No study                                        |                                 |                |                  | No Study                 |                                 |                |                  | <b>0.60 (0.18, 1.01)</b>    | 1 (95)                          | NA             | +                | <b>0.60 (0.18, 1.01)*</b>    | 1 (95)                          | NA             | +                |

| Comparisons                                                            | Pain, longest follow-up                   |                              |                |                  | Pain, shortest follow-up |                              |                |                  | Function, longest follow-up |                              |                |                  | Function, shortest follow-up |                              |                |                  |
|------------------------------------------------------------------------|-------------------------------------------|------------------------------|----------------|------------------|--------------------------|------------------------------|----------------|------------------|-----------------------------|------------------------------|----------------|------------------|------------------------------|------------------------------|----------------|------------------|
|                                                                        | SMD (95%CI)                               | N                            | I <sup>2</sup> | G                | SMD (95%CI)              | N                            | I <sup>2</sup> | G                | SMD (95%CI)                 | N                            | I <sup>2</sup> | G                | SMD (95%CI)                  | N                            | I <sup>2</sup> | G                |
|                                                                        | Negative values favour left-hand therapy. | Comparisons/Trial (Patients) |                | R<br>A<br>D<br>E |                          | Comparisons/Trial (Patients) |                | R<br>A<br>D<br>E |                             | Comparisons/Trial (Patients) |                | R<br>A<br>D<br>E |                              | Comparisons/Trial (Patients) |                | R<br>A<br>D<br>E |
| Traditional Exercise + Eccentric Exercise vs Traditional Exercise Only | No study                                  |                              |                |                  | No Study                 |                              |                |                  | 0.16 (-0.27, 0.59)          | 1 (84)                       | NA             | +                | 0.16 (-0.27, 0.59)*          | 1 (84)                       | NA             | +                |
| Closed Kinetic Chain vs Open Kinetic Chain                             | No study                                  |                              |                |                  | No Study                 |                              |                |                  | 1.70 (-0.77, 4.17)          | 2/2 (94)                     | 87             | +                | 1.70 (-0.77, 4.17)*          | 2/2 (94)                     | 87             | +                |
| Range of Motion Exercises versus Muscle Activation Exercises           | No study                                  |                              |                |                  | No Study                 |                              |                |                  | -0.09 (-0.66, 0.48)         | 2/0 (120)                    | 55             | +                | -0.09 (-0.66, 0.48)*         | 2/0 (120)                    | 55             | +                |

### Manual therapy

|                                                |                             |           |    |   |                             |           |    |   |                     |           |    |   |                             |           |    |   |
|------------------------------------------------|-----------------------------|-----------|----|---|-----------------------------|-----------|----|---|---------------------|-----------|----|---|-----------------------------|-----------|----|---|
| Manual Therapy vs Placebo                      | <b>-0.35 (-0.69, -0.01)</b> | 4/4 (137) | 0  | + | -0.31 (-0.63, 0.01)         | 3/3 (130) | 0  | + | 0.17 (-0.41, 0.75)  | 2/2 (47)  | 0  | + | 0.09 (-0.39, 0.57)          | 2/2 (67)  | 0  | + |
| Manual Therapy plus Exercise vs Exercise alone | -0.24 (-0.60, 0.12)         | 9/9 (360) | 62 | + | <b>-0.32 (-0.62, -0.01)</b> | 9/9 (363) | 48 | + | -0.34 (-0.75, 0.07) | 7/7 (301) | 65 | + | <b>-0.41 (-0.71, -0.11)</b> | 7/7 (301) | 35 | + |
| Manual Therapy plus Exercise vs Exercise plus  | 0.53 (-0.02, 1.07)          | 1 (54)    | NA | + | 0.53 (-0.02, 1.07)*         | 1 (54)    | NA | + | -0.20 (-0.77, 0.37) | 1 (48)    | NA | + | -0.20 (-0.77, 0.37)*        | 1 (48)    | NA | + |

| Comparisons                                                                  | Pain, longest follow-up                         |                                 |                |                  | Pain, shortest follow-up |                                 |                |                  | Function, longest follow-up |                                 |                |                  | Function, shortest follow-up |                                 |                |                  |  |
|------------------------------------------------------------------------------|-------------------------------------------------|---------------------------------|----------------|------------------|--------------------------|---------------------------------|----------------|------------------|-----------------------------|---------------------------------|----------------|------------------|------------------------------|---------------------------------|----------------|------------------|--|
|                                                                              | SMD (95%CI)                                     | N                               | I <sup>2</sup> | G                | SMD (95%CI)              | N                               | I <sup>2</sup> | G                | SMD (95%CI)                 | N                               | I <sup>2</sup> | G                | SMD (95%CI)                  | N                               | I <sup>2</sup> | G                |  |
|                                                                              | Negative values<br>favour left-hand<br>therapy. | Comparisons/Trial<br>(Patients) |                | R<br>A<br>D<br>E |                          | Comparisons/Trial<br>(Patients) |                | R<br>A<br>D<br>E |                             | Comparisons/Trial<br>(Patients) |                | R<br>A<br>D<br>E |                              | Comparisons/Trial<br>(Patients) |                | R<br>A<br>D<br>E |  |
| Tape                                                                         |                                                 |                                 |                |                  |                          |                                 |                |                  |                             |                                 |                |                  |                              |                                 |                |                  |  |
| Manual Therapy plus<br>Exercise vs Naturopathic<br>Care                      | 0.88 (0.44, 1.33)                               | 1 (85)                          | NA             | +                | 0.88 (0.44, 1.33)*       | 1 (85)                          | NA             | +                | 0.95 (0.45, 1.46)           | 1 (68)                          | NA             | +                | 0.95 (0.45, 1.46)*           | 1 (68)                          | NA             | +                |  |
| Manual Therapy plus<br>Exercise vs Corticosteroid<br>Injection               | No study                                        |                                 |                |                  | No study                 |                                 |                |                  | -0.10 (-0.43, 0.23)         | 1 (143)                         | NA             | +                | -0.08 (-0.42, 0.25)          | 1 (137)                         | NA             | +                |  |
| Manual Therapy plus<br>Exercise versus Sham<br>Ultrasound and Placebo<br>Gel | -0.35 (-0.71, 0.01)                             | 1 (120)                         | NA             | +                | -0.30 (-0.66, 0.06)      | 1 (120)                         | NA             | +                | <b>-0.42 (-0.78, -0.06)</b> | 1 (120)                         | NA             | +                | -0.28 (-0.64, 0.08)          | 1 (120)                         | NA             | +                |  |
| Manual Therapy plus<br>Exercise versus Medication<br>(Misc.)                 | -0.19 (-0.60, 0.21)                             | 1 (94)                          | NA             | +                | -0.05 (-0.47, 0.37)      | 1 (88)                          | NA             | +                | -0.15 (-0.78, 0.49)         | 1 (39)                          | 0              | +                | -0.15 (-0.78, 0.49)*         | 1 (39)                          | 0              | +                |  |
| Manual Therapy plus<br>Exercise plus<br>Corticosteroids versus               | No Study                                        |                                 |                |                  | No Study                 |                                 |                |                  | -0.06 (-0.63, 0.52)         | 1 (47)                          | NA             | +                | -0.06 (-0.63, 0.52)*         | 1 (47)                          | NA             | +                |  |

| Comparisons                                                                        | Pain, longest follow-up                   |                              |                |                  | Pain, shortest follow-up     |                              |                |                  | Function, longest follow-up |                              |                |                  | Function, shortest follow-up |                              |                |                  |
|------------------------------------------------------------------------------------|-------------------------------------------|------------------------------|----------------|------------------|------------------------------|------------------------------|----------------|------------------|-----------------------------|------------------------------|----------------|------------------|------------------------------|------------------------------|----------------|------------------|
|                                                                                    | SMD (95%CI)                               | N                            | I <sup>2</sup> | G                | SMD (95%CI)                  | N                            | I <sup>2</sup> | G                | SMD (95%CI)                 | N                            | I <sup>2</sup> | G                | SMD (95%CI)                  | N                            | I <sup>2</sup> | G                |
|                                                                                    | Negative values favour left-hand therapy. | Comparisons/Trial (Patients) |                | R<br>A<br>D<br>E |                              | Comparisons/Trial (Patients) |                | R<br>A<br>D<br>E |                             | Comparisons/Trial (Patients) |                | R<br>A<br>D<br>E |                              | Comparisons/Trial (Patients) |                | R<br>A<br>D<br>E |
| Corticosteroid Injections                                                          |                                           |                              |                |                  |                              |                              |                |                  |                             |                              |                |                  |                              |                              |                |                  |
| Immediate Effects: Manual Therapy vs Placebo                                       | <b>-0.62 (-0.97, -0.28)</b>               | 3/3 (134)                    | 0              | +                | <b>-0.62 (-0.97, -0.28)*</b> | 3/3 (134)                    | 0              | +                | No Study                    |                              |                |                  | No Study                     |                              |                |                  |
| Neck or Thoracic Manual Therapy versus Shoulder Treatment including Manual Therapy | 0.07 (-0.43, 0.58)                        | 2/2 (86)                     | 17             | +                | 0.03 (-0.55, 0.61)           | 2/2 (86)                     | NA             | +                | 0.22 (-0.18, 0.61)          | 3/3 (103)                    | 0              | +                | 0.22 (-0.18, 0.61)*          | 2/2 (101)                    | 0              | +                |
| Manual Therapy vs Supervised Exercise                                              | -0.22 (-1.13, 0.70)                       | 1 (19)                       | NA             | +                | -0.23 (-0.85, 0.39)          | 1 (40)                       | NA             | +                | -0.39 (-0.53, 1.31)         | 1(19)                        | NA             | +                | -0.23 (-0.85, 0.39)          | 1(40)                        | NA             | +                |
| Manual Therapy plus Kinesiotape plus Exercise versus Exercise plus Kinesiotape     | <b>-1.18 (-1.90, -0.46)</b>               | 1 (36)                       | 17             | +                | <b>-1.18 (-1.90, -0.46)*</b> | 1 (36)                       | 17             | +                | <b>-0.77 (-1.45, -0.08)</b> | 1 (36)                       | NA             | +                | <b>-0.77 (-1.45, -0.08)*</b> | 1 (36)                       | 0              | +                |
| Manual Therapy versus Myofascial Trigger Point Therapy                             | 0.18 (-0.46, 0.81)                        | 1 (38)                       | 17             | +                | -0.14 (-0.77, 0.50)          | 1 (38)                       | NA             | +                | 0.00 (-0.64, 0.63)          | 1 (38)                       | NA             | +                | 0.00 (-0.64, 0.63)*          | 1 (38)                       | 0              | +                |



| Comparisons | Pain, longest follow-up                   |                              |                |                  | Pain, shortest follow-up |                              |                |                  | Function, longest follow-up |                              |                |                  | Function, shortest follow-up |                              |                |                  |
|-------------|-------------------------------------------|------------------------------|----------------|------------------|--------------------------|------------------------------|----------------|------------------|-----------------------------|------------------------------|----------------|------------------|------------------------------|------------------------------|----------------|------------------|
|             | SMD (95%CI)                               | N                            | I <sup>2</sup> | G                | SMD (95%CI)              | N                            | I <sup>2</sup> | G                | SMD (95%CI)                 | N                            | I <sup>2</sup> | G                | SMD (95%CI)                  | N                            | I <sup>2</sup> | G                |
|             | Negative values favour left-hand therapy. | Comparisons/Trial (Patients) |                | R<br>A<br>D<br>E |                          | Comparisons/Trial (Patients) |                | R<br>A<br>D<br>E |                             | Comparisons/Trial (Patients) |                | R<br>A<br>D<br>E |                              | Comparisons/Trial (Patients) |                | R<br>A<br>D<br>E |

### Laser

|                                                                                                               |                             |           |    |   |                              |           |    |   |                             |           |    |   |                              |           |    |   |
|---------------------------------------------------------------------------------------------------------------|-----------------------------|-----------|----|---|------------------------------|-----------|----|---|-----------------------------|-----------|----|---|------------------------------|-----------|----|---|
| Laser plus Exercise vs Exercise (plus Sham Laser)                                                             | <b>-0.65 (-0.99, -0.31)</b> | 6/6 (313) | 53 | + | <b>-0.65 (-0.99, -0.31)*</b> | 6/6 (313) | 53 | + | 0.12 (-0.24, 0.49)          | 4/4 (190) | 50 | + | 0.12 (-0.24, 0.49)*          | 4/4 (190) | 50 | + |
| Laser vs Sham Laser                                                                                           | <b>-0.88 (-1.48, -0.27)</b> | 3/3 (128) | 58 | + | <b>-0.80 (-1.43, -0.17)</b>  | 3/3 (128) | 61 | + | -0.67 (-1.60, 0.25)         | 2/2 (125) | 81 | + | -0.67 (-1.60, 0.25)*         | 2/2 (125) | 81 | + |
| Laser plus Exercise vs US plus Exercise                                                                       | -0.15 (-0.63, 0.34)         | 2/2 (67)  | 0  | + | -0.07 (-0.55, 0.42)          | 2/2 (67)  | 0  | + | <b>-0.63 (-1.25, -0.01)</b> | 1 (42)    | NA | + | <b>-0.63 (-1.25, -0.01)*</b> | 1 (42)    | NA | + |
| Laser vs Ultrasound                                                                                           | <b>-1.39 (-1.91, -0.86)</b> | 1 (70)    | NA | + | <b>-1.39 (-1.91, -0.86)*</b> | 1 (70)    | NA | + | -0.46 (-1.17, 0.26)         | 3 (162)   | 80 | + | -0.46 (-1.17, 0.26)*         | 3 (162)   | 80 | + |
| Laser vs Medication                                                                                           | 0.18 (-0.25, 0.61)          | 1 (83)    | NA | + | 0.18 (-0.25, 0.61)*          | 1 (83)    | NA | + | 0.13 (-0.29, 0.54)          | 1 (90)    | NA | + | 0.34 (-0.08, 0.76)           | 1 (90)    | NA | + |
| Laser plus Manual Therapy plus Kinesiotape plus Exercise versus Manual Therapy plus Kinesiotape plus Exercise | -0.12 (-0.76, 0.52)         | 1 (38)    | NA | + | 0.12 (-0.76, 0.52)*          | 1 (38)    | NA | + | -0.35 (-0.99, 0.29)         | 1 (38)    | NA | + | -0.35 (-0.99, 0.29)*         | 1 (38)    | NA | + |

### Ultrasound

| Comparisons                                                    | Pain, longest follow-up                   |                              |                |                  | Pain, shortest follow-up |                              |                |                  | Function, longest follow-up |                              |                |                  | Function, shortest follow-up |                              |                |                  |
|----------------------------------------------------------------|-------------------------------------------|------------------------------|----------------|------------------|--------------------------|------------------------------|----------------|------------------|-----------------------------|------------------------------|----------------|------------------|------------------------------|------------------------------|----------------|------------------|
|                                                                | SMD (95%CI)                               | N                            | I <sup>2</sup> | G                | SMD (95%CI)              | N                            | I <sup>2</sup> | G                | SMD (95%CI)                 | N                            | I <sup>2</sup> | G                | SMD (95%CI)                  | N                            | I <sup>2</sup> | G                |
|                                                                | Negative values favour left-hand therapy. | Comparisons/Trial (Patients) |                | R<br>A<br>D<br>E |                          | Comparisons/Trial (Patients) |                | R<br>A<br>D<br>E |                             | Comparisons/Trial (Patients) |                | R<br>A<br>D<br>E |                              | Comparisons/Trial (Patients) |                | R<br>A<br>D<br>E |
| Ultrasound vs Sham<br>Ultrasound                               | -0.14 (-0.54, 0.25)                       | 2/2 (100)                    | 0              | +                | -0.09 (-0.62, 0.44)      | 2/2 (105)                    | 41             | +                | -0.12 (-0.52, 0.27)         | 2/2 (100)                    | 0              | +                | -0.14 (-0.53, 0.26)          | 2/2 (100)                    | 0              | +                |
| Ultrasound plus Hotpack plus Exercise vs Hotpack plus Exercise | -0.59 (-1.25, 0.08)                       | 1 (37)                       | NA             | +                | -0.59 (-1.25, 0.08)*     | 1 (37)                       | NA             | +                | -0.64 (-1.31, 0.02)         | 1 (37)                       | NA             | +                | 0.15 (-0.52, 0.81)           | 1 (36)                       | NA             | +                |
| Ultrasound vs Hyperthermia                                     | 1.43 (0.55, 2.31)                         | 1 (26)                       | NA             | +                | 1.27 (0.42, 2.13)        | 1 (26)                       | NA             | +                | 1.06 (0.22, 1.89)           | 1 (26)                       | NA             | +                | 1.26 (0.41, 2.21)            | 1 (26)                       | NA             | +                |
| Ultrasound plus Exercise vs Sham US and Exercise               | 0.10 (-0.32, 0.53)                        | 2/2 (84)                     | 0              |                  | 0.12 (-0.31, 0.55)       | 2/2 (84)                     | 0              |                  | -0.28 (-0.65, 0.09)         | 3/3 (115)                    | 0              | +                | -0.16 (-0.65, 0.34)          | 3/3 (115)                    | 42             | +                |
| Ultrasound vs Passive Exercises                                | 0.08 (-0.74, 0.90)                        | 1 (23)                       | NA             | +                | 0.17 (-0.65, 0.99)       | 1 (23)                       | NA             | +                | 0.09 (-0.73, 0.91)          | 1 (23)                       | NA             | +                | 0.09 (-0.73, 0.91)*          | 1 (23)                       | NA             | +                |
| Ultrasound plus Exercise vs Laser plus Exercise                | 0.15 (-0.34, 0.63)                        | 2/2 (67)                     | 0              | +                | 0.07 (-0.42, 0.55)       | 2/2 (67)                     | 0              | +                | 0.59 (0.12, 1.06)           | 2/2 (73)                     | 0              | +                | 0.40 (-0.06, 0.87)           | 2/2 (73)                     | 0              | +                |
| Ultrasound vs Acupuncture                                      | 0.22 (-0.21, 0.65)                        | 1 (85)                       | NA             | +                | 0.30 (-0.13, 0.72)       | 1 (85)                       | NA             | +                | No Study                    |                              |                |                  | No Study                     |                              |                |                  |

| Comparisons                                        | Pain, longest follow-up                         |                                 |                |                  | Pain, shortest follow-up     |                                 |                |                  | Function, longest follow-up |                                 |                |                  | Function, shortest follow-up |                                 |                |                  |
|----------------------------------------------------|-------------------------------------------------|---------------------------------|----------------|------------------|------------------------------|---------------------------------|----------------|------------------|-----------------------------|---------------------------------|----------------|------------------|------------------------------|---------------------------------|----------------|------------------|
|                                                    | SMD (95%CI)                                     | N                               | I <sup>2</sup> | G                | SMD (95%CI)                  | N                               | I <sup>2</sup> | G                | SMD (95%CI)                 | N                               | I <sup>2</sup> | G                | SMD (95%CI)                  | N                               | I <sup>2</sup> | G                |
|                                                    | Negative values<br>favour left-hand<br>therapy. | Comparisons/Trial<br>(Patients) |                | R<br>A<br>D<br>E |                              | Comparisons/Trial<br>(Patients) |                | R<br>A<br>D<br>E |                             | Comparisons/Trial<br>(Patients) |                | R<br>A<br>D<br>E |                              | Comparisons/Trial<br>(Patients) |                | R<br>A<br>D<br>E |
| Ultrasound vs Laser                                | 1.38 (0.85, 1.90)                               | 1 (70)                          | NA             | +                | 1.38 (0.85, 1.90)*           | 1 (70)                          | NA             | +                | 0.60 (-0.05, 1.25)          | 3/3 (168)                       | 76             | +                | 0.60 (-0.05, 1.25)*          | 3/3 (168)                       | 76             | +                |
| Long Duration vs Short Duration                    | <b>-1.32 (-1.76, -0.89)</b>                     | 1 (100)                         | NA             | +                | <b>-1.32 (-1.76, -0.89)*</b> | 1 (100)                         | NA             | +                | <b>-0.42 (-0.82, -0.02)</b> | 1 (100)                         | NA             | +                | <b>-0.42 (-0.82, -0.02)*</b> | 1 (100)                         | NA             | +                |
| Ultrasound vs Myofascial Trigger Point Therapy     | 1.84 (0.97, 2.71)                               | 1 (30)                          | NA             | +                | 1.84 (0.97, 2.71)*           | 1 (30)                          | NA             | +                | No Study                    |                                 |                |                  | No Study                     |                                 |                |                  |
| Ultrasound versus Phonophoresis with Dexketoprofen | -0.07 (-0.41, 0.56)                             | 1 (65)                          | NA             | +                | -0.07 (-0.41, 0.56)*         | 1 (65)                          | NA             | +                | 0.14 (-0.35, 0.62)          | 1 (65)                          | NA             | +                | -0.14 (-0.63, 0.34)          | 1 (65)                          | NA             | +                |
| Ultrasound versus Iontophoresis with Dexketoprofen | 0.18 (-0.30, 0.67)                              | 1 (66)                          | NA             | +                | -0.18 (-0.67, 0.30)          | 1 (66)                          | NA             | +                | 0.10 (-0.39, 0.58)          | 1 (66)                          | NA             | +                | -0.16 (-0.64, 0.32)          | 1 (66)                          | NA             | +                |
| Ultrasound vs Deep Friction                        | 0.79 (0.15, 1.44)                               | 1 (40)                          | NA             | +                | 0.79 (0.15, 1.44)*           | 1 (40)                          | NA             | +                | No Study                    |                                 |                |                  | No Study                     |                                 |                |                  |

**Extracorporeal Shockwave Treatment**

- ESWT

| Comparisons               | Pain, longest follow-up                   |                              |                |                  | Pain, shortest follow-up    |                              |                |                  | Function, longest follow-up |                              |                |                  | Function, shortest follow-up |                              |                |                  |
|---------------------------|-------------------------------------------|------------------------------|----------------|------------------|-----------------------------|------------------------------|----------------|------------------|-----------------------------|------------------------------|----------------|------------------|------------------------------|------------------------------|----------------|------------------|
|                           | SMD (95%CI)                               | N                            | I <sup>2</sup> | G                | SMD (95%CI)                 | N                            | I <sup>2</sup> | G                | SMD (95%CI)                 | N                            | I <sup>2</sup> | G                | SMD (95%CI)                  | N                            | I <sup>2</sup> | G                |
|                           | Negative values favour left-hand therapy. | Comparisons/Trial (Patients) |                | R<br>A<br>D<br>E |                             | Comparisons/Trial (Patients) |                | R<br>A<br>D<br>E |                             | Comparisons/Trial (Patients) |                | R<br>A<br>D<br>E |                              | Comparisons/Trial (Patients) |                | R<br>A<br>D<br>E |
| ESWT vs Exercise          | 0.09 (-0.32, 0.49)                        | 1 (94)                       | NA             | +                | 0.09 (-0.32, 0.49)*         | 1 (94)                       | NA             | +                | -0.44 (-1.64, 0.76)         | 2 (154)                      | 92             | +                | -0.44 (-1.64, 0.76)*         | 2 (154)                      | 92             | +                |
| ESWT vs Sham ESWT         | <b>-0.39 (-0.78, -0.01)</b>               | 3/3 (117)                    | 6              | +                | -0.22 (-0.72, 0.28)         | 3/3 (122)                    | 42             | +                | -0.27 (-0.90, 0.35)         | 3/3 (117)                    | 60             | +                | -1.53 (-3.63, 0.57)          | 3/3 (117)                    | 95             | +                |
| High Energy vs Low Energy | 0.07 (-0.58, 0.71)                        | 1 (37)                       | NA             | +                | 0.27 (-0.38, 0.91)          | 1 (37)                       | NA             | +                | -0.53 (-1.19, 0.13)         | 1 (37)                       | NA             | +                | -0.41 (-1.07, 0.24)          | 1 (37)                       | NA             | +                |
| ESWT vs Radiotherapy      | -0.26 (-0.98, 0.46)                       | 1 (30)                       | NA             | +                | <b>-0.93 (-1.69, -0.17)</b> | 1 (30)                       | NA             | +                | -0.43 (-1.15, 0.30)         | 1 (30)                       | NA             | +                | -0.43 (-1.15, 0.30)*         | 1 (30)                       | NA             | +                |
| ESWT vs Advice            | No Study                                  |                              |                |                  | No Study                    |                              |                |                  | <b>-1.11 (-1.66, -0.57)</b> | 1 (60)                       | NA             | +                | <b>-1.11 (-1.66, -0.57)*</b> | 1 (60)                       | NA             | +                |

### Tape

|                                                          |                     |           |    |   |                     |           |    |   |                     |           |    |   |                     |           |    |   |
|----------------------------------------------------------|---------------------|-----------|----|---|---------------------|-----------|----|---|---------------------|-----------|----|---|---------------------|-----------|----|---|
| Tape plus Exercise vs Physiotherapy (including Exercise) | -0.01 (-0.78, 0.81) | 4/4 (161) | 82 | + | -0.10 (-0.91, 0.72) | 4/4 (161) | 83 | + | -0.02 (-0.74, 0.69) | 4/4 (161) | 78 | + | -0.12 (-0.87, 0.63) | 4/4 (161) | 80 | + |
| Tape plus Exercise vs Corticosteroids plus Exercise      | 0.17 (-0.18, 0.51)  | 2/2 (131) | 0  | + | 0.06 (-0.28, 0.40)  | 2/2 (131) | 0  | + | 0.21 (-0.13, 0.56)  | 2/2 (131) | 0  | + | 0.15 (-0.20, 0.49)* | 2/2 (131) | 0  | + |
| Pre-Cut-Tape plus exercise                               | 0.30 (-0.20, 0.80)  | 1 (62)    | NA | + | 0.30 (-0.20, 0.80)* | 1 (62)    | NA | + | 0.17 (-0.33, 0.67)  | 1 (62)    | NA | + | 0.17 (-0.33, 0.67)* | 1 (62)    | NA | + |

| Comparisons                                             | Pain, longest follow-up                   |                              |                |                  | Pain, shortest follow-up     |                              |                |                  | Function, longest follow-up |                              |                |                  | Function, shortest follow-up |                              |                |                  |
|---------------------------------------------------------|-------------------------------------------|------------------------------|----------------|------------------|------------------------------|------------------------------|----------------|------------------|-----------------------------|------------------------------|----------------|------------------|------------------------------|------------------------------|----------------|------------------|
|                                                         | SMD (95%CI)                               | N                            | I <sup>2</sup> | G                | SMD (95%CI)                  | N                            | I <sup>2</sup> | G                | SMD (95%CI)                 | N                            | I <sup>2</sup> | G                | SMD (95%CI)                  | N                            | I <sup>2</sup> | G                |
|                                                         | Negative values favour left-hand therapy. | Comparisons/Trial (Patients) |                | R<br>A<br>D<br>E |                              | Comparisons/Trial (Patients) |                | R<br>A<br>D<br>E |                             | Comparisons/Trial (Patients) |                | R<br>A<br>D<br>E |                              | Comparisons/Trial (Patients) |                | R<br>A<br>D<br>E |
| versus NSAID plus exercise                              |                                           |                              |                |                  |                              |                              |                |                  |                             |                              |                |                  |                              |                              |                |                  |
| Pre-Cut-Tape plus exercise versus exercise only         | 0.11 (-0.35, 0.58)                        | 1 (71)                       | NA             | +                | 0.11 (-0.35, 0.58)*          | 1 (71)                       | NA             | +                | -0.12 (-0.59, 0.35)         | 1 (71)                       | NA             | +                | -0.12 (-0.59, 0.35)*         | 1 (71)                       | NA             | +                |
| Kinesiotape plus NSAID versus Corticosteroid plus NSAID | 0.00 (-0.48, 0.48)                        | 1/1 (66)                     | Na             | +                | 0.00 (-0.48, 0.48)*          | 1/1 (66)                     | NA             | +                | -0.40 (-0.89, 0.08)         | 1 (66)                       | NA             | +                | -0.40 (-0.89, 0.08)*         | 1 (66)                       | 0              | +                |
| Kinesiotape plus NSAID versus NSAID                     | <b>-0.82 (-1.33, -0.32)</b>               | 1/1 (66)                     | 86             | +                | <b>-0.82 (-1.33, -0.32)*</b> | 1/1 (66)                     | 86             | +                | <b>-1.22 (-1.74, -0.69)</b> | 1 (66)                       | NA             | +                | <b>-1.22 (-1.74, -0.69)*</b> | 1 (66)                       | NA             | +                |
| Taping versus Sham Taping                               | <b>-0.64 (-1.16, -0.12)</b>               | 5/5 (155)                    | 73             | +                | -0.49 (-1.06, 0.08)          | 5/5 (155)                    | 78             | +                | -0.75 (-1.64, 0.15)         | 3/3 (122)                    | 82             | +                | <b>-0.52 (-1.00, -0.04)</b>  | 3/3 (123)                    | 43             | +                |
| <b>Hyaluronate</b>                                      |                                           |                              |                |                  |                              |                              |                |                  |                             |                              |                |                  |                              |                              |                |                  |
| Hyaluronate vs Placebo                                  | -0.76 (-1.87, 0.36)                       | 3/3 (183)                    | 92             | +                | -0.33 (-1.02, 0.36)          | 3/3 (195)                    | 81             | +                | -0.50 (-1.56, 0.55)         | 3/3 (183)                    | 91             | +                | -0.50 (-1.56, 0.55)*         | 3/3 (183)                    | 91             | +                |
| Hyaluronate vs Control                                  | -0.23 (-1.05, 0.58)                       | 2/2 (50)                     | 52             | +                | -0.23 (-1.05, 0.58)*         | 2/2 (50)                     | 52             | +                | -0.38 (-1.13, 0.38)         | 2/2 (50)                     | 44             | +                | -1.56 (-4.69, 1.58)          | 2/2 (50)                     | 95             | *                |
| Hyaluronate vs                                          | 0.22 (-0.33, 0.77)                        | 5/4 (277)                    | 75             | +                | 0.32 (-0.39, 1.03)           | 5/4 (289)                    | 86             | +                | 0.21 (-0.17, 0.59)          | 5/4 (277)                    | 51             | +                | 0.21 (-0.17, 0.59)*          | 5/4 (277)                    | 51             | +                |

| Comparisons     | Pain, longest follow-up                   |                              |                |                  | Pain, shortest follow-up |                              |                |                  | Function, longest follow-up |                              |                |                  | Function, shortest follow-up |                              |                |                  |
|-----------------|-------------------------------------------|------------------------------|----------------|------------------|--------------------------|------------------------------|----------------|------------------|-----------------------------|------------------------------|----------------|------------------|------------------------------|------------------------------|----------------|------------------|
|                 | SMD (95%CI)                               | N                            | I <sup>2</sup> | G                | SMD (95%CI)              | N                            | I <sup>2</sup> | G                | SMD (95%CI)                 | N                            | I <sup>2</sup> | G                | SMD (95%CI)                  | N                            | I <sup>2</sup> | G                |
|                 | Negative values favour left-hand therapy. | Comparisons/Trial (Patients) |                | R<br>A<br>D<br>E |                          | Comparisons/Trial (Patients) |                | R<br>A<br>D<br>E |                             | Comparisons/Trial (Patients) |                | R<br>A<br>D<br>E |                              | Comparisons/Trial (Patients) |                | R<br>A<br>D<br>E |
| Corticosteroids |                                           |                              |                |                  |                          |                              |                |                  |                             |                              |                |                  |                              |                              |                |                  |

#### Pulsed Electromagnetic Field - PEMF

|                                 |                     |           |    |   |                      |           |    |   |                     |          |   |   |                      |          |   |   |
|---------------------------------|---------------------|-----------|----|---|----------------------|-----------|----|---|---------------------|----------|---|---|----------------------|----------|---|---|
| PEMF vs Sham PEMF               | 0.34 (-0.60, 1.29)  | 3/3 (118) | 82 | + | 0.34 (-0.60, 1.29)*  | 3/3 (118) | 82 | + | -0.26 (-0.66, 0.15) | 2/2 (96) | 0 | + | -0.26 (-0.66, 0.15)* | 2/2 (96) | 0 | + |
| Long Duration vs Short Duration | -0.06 (-0.66, 0.54) | 1 (43)    | NA | + | -0.06 (-0.66, 0.54)* | 1 (43)    | NA | + | No Study            |          |   |   | No Study             |          |   |   |

#### TENS

|                         |                             |        |    |   |                              |        |    |   |                          |        |    |   |                          |        |    |   |
|-------------------------|-----------------------------|--------|----|---|------------------------------|--------|----|---|--------------------------|--------|----|---|--------------------------|--------|----|---|
| TENS vs Sham            | <b>-1.30 (-2.28, -0.31)</b> | 1 (20) | NA | + | <b>-1.30 (-2.28, -0.31)*</b> | 1 (20) | NA | + | No Study                 |        |    |   | No Study                 |        |    |   |
| TENS vs Corticosteroids | 0.84 (0.20, 1.49)           | 1 (40) | NA | + | 0.49 (-0.14, 1.11)           | 1 (40) | NA | + | <b>1.17 (0.50, 1.85)</b> | 1 (40) | NA | + | <b>1.31 (0.62, 2.00)</b> | 1 (40) | NA | + |
| TENS vs Heat            | -0.01 (-0.63, 0.61)         | 1 (45) | NA | + | -0.01 (-0.63, 0.61)*         | 1 (45) | NA | + | No Study                 |        |    |   | No Study                 |        |    |   |
| TENS plus HEAT vs HEAT  | -0.50 (-1.11, 0.11)         | 1 (47) | NA | + | -0.50 (-1.11, 0.11)*         | 1 (47) | NA | + | No Study                 |        |    |   | No Study                 |        |    |   |

#### Surgery (only included, when compared with conservative interventions)

| Comparisons                                                               | Pain, longest follow-up                   |                              |                |                  | Pain, shortest follow-up     |                              |                |                  | Function, longest follow-up |                              |                |                  | Function, shortest follow-up |                              |                |                  |
|---------------------------------------------------------------------------|-------------------------------------------|------------------------------|----------------|------------------|------------------------------|------------------------------|----------------|------------------|-----------------------------|------------------------------|----------------|------------------|------------------------------|------------------------------|----------------|------------------|
|                                                                           | SMD (95%CI)                               | N                            | I <sup>2</sup> | G                | SMD (95%CI)                  | N                            | I <sup>2</sup> | G                | SMD (95%CI)                 | N                            | I <sup>2</sup> | G                | SMD (95%CI)                  | N                            | I <sup>2</sup> | G                |
|                                                                           | Negative values favour left-hand therapy. | Comparisons/Trial (Patients) |                | R<br>A<br>D<br>E |                              | Comparisons/Trial (Patients) |                | R<br>A<br>D<br>E |                             | Comparisons/Trial (Patients) |                | R<br>A<br>D<br>E |                              | Comparisons/Trial (Patients) |                | R<br>A<br>D<br>E |
| Surgery vs Exercise                                                       | 0.13 (-0.52, 0.78)                        | 3/3 (291)                    | 73             | +                | -0.25 (-0.74, 0.25)*         | 3/3 (321)                    | 80             | +                | 0.05 (-0.18, 0.28)          | 3/3 (296)                    | 0              | +                | 0.02 (-0.20, 0.24)           | 3/3 (321)                    | 0              | +                |
| Primary tendon repair versus Physiotherapy with optional secondary repair | <b>-0.66 (-1.06, -0.26)</b>               | 1 (103)                      | NA             | +                | <b>-0.66 (-1.06, -0.26)*</b> | 1 (103)                      | NA             | +                | -0.31 (-0.70, 0.08)         | 1 (103)                      | NA             | +                | -0.31 (-0.70, 0.08)*         | 1 (103)                      | NA             | +                |
| Surgery vs comprehensive Physiotherapy                                    | -0.37 (-0.92, 0.18)                       | 1 (55)                       | NA             | +                | -0.37 (-0.92, 0.18)*         | 1 (55)                       | NA             | +                | -0.37 (-0.92, 0.18)         | 1 (55)                       | NA             | +                | -0.37 (-0.92, 0.18)*         | 1 (55)                       | NA             | +                |
| Surgery Dichotomous (Risk Difference)                                     | <b>31% (13%, 49%)</b>                     | <b>2/2 (105)</b>             | 0              | +                | <b>31% (13%, 49%)*</b>       | <b>2/2 (105)</b>             | 0              | +                | No Study                    |                              |                |                  | No Study                     |                              |                |                  |
| <b>Nerve block</b>                                                        |                                           |                              |                |                  |                              |                              |                |                  |                             |                              |                |                  |                              |                              |                |                  |
| Nerve Block vs Control                                                    | <b>-0.91 (-1.27, -0.54)</b>               | 3/3 (129)                    | 0              | +                | <b>-0.86 (-1.22, -0.50)</b>  | 3/3 (129)                    | 0              | +                | <b>-0.55 (-1.01, -0.08)</b> | 1 (74)                       | NA             | +                | <b>-0.56 (-1.02, -0.09)</b>  | 1 (74)                       | NA             | +                |
| <b>Diacutaneous Fibrolysis</b>                                            |                                           |                              |                |                  |                              |                              |                |                  |                             |                              |                |                  |                              |                              |                |                  |
| Diacutaneous Fibrolysis vs Sham Diacutaneous                              | -0.08 (-0.42, 0.27)                       | 2/2 (130)                    | 0              | +                | -0.13 (-0.48, 0.21)          | 2/2 (130)                    | NA             | +                | <b>-0.65 (-1.10, -0.20)</b> | 1 (80)                       | NA             | +                | <b>-0.49 (-0.93, -0.04)</b>  | 1 (80)                       | NA             | +                |

| Comparisons                                       | Pain, longest follow-up                   |                              |                |                  | Pain, shortest follow-up |                              |                |                  | Function, longest follow-up |                              |                |                  | Function, shortest follow-up |                              |                |                  |  |
|---------------------------------------------------|-------------------------------------------|------------------------------|----------------|------------------|--------------------------|------------------------------|----------------|------------------|-----------------------------|------------------------------|----------------|------------------|------------------------------|------------------------------|----------------|------------------|--|
|                                                   | SMD (95%CI)                               | N                            | I <sup>2</sup> | G                | SMD (95%CI)              | N                            | I <sup>2</sup> | G                | SMD (95%CI)                 | N                            | I <sup>2</sup> | G                | SMD (95%CI)                  | N                            | I <sup>2</sup> | G                |  |
|                                                   | Negative values favour left-hand therapy. | Comparisons/Trial (Patients) |                | R<br>A<br>D<br>E |                          | Comparisons/Trial (Patients) |                | R<br>A<br>D<br>E |                             | Comparisons/Trial (Patients) |                | R<br>A<br>D<br>E |                              | Comparisons/Trial (Patients) |                | R<br>A<br>D<br>E |  |
| Fibrolysis                                        |                                           |                              |                |                  |                          |                              |                |                  |                             |                              |                |                  |                              |                              |                |                  |  |
| Diacutaneous Fibrolysis vs Control                | -0.23 (-0.67, 0.21)                       | 1 (80)                       | NA             | +                | -0.33 (-0.77, 0.11)      | 1 (80)                       | NA             | +                | -0.34 (-0.78, 0.10)         | 1 (80)                       | NA             | +                | <b>-0.69 (-1.14, -0.24)</b>  | 1 (80)                       | NA             | +                |  |
| <b>Acupuncture</b>                                |                                           |                              |                |                  |                          |                              |                |                  |                             |                              |                |                  |                              |                              |                |                  |  |
| Acupuncture + Exercise vs US plus Exercise        | -0.22 (-0.65, 0.21)                       | 1 (85)                       | NA             | +                | -0.30 (-0.72, 0.13)      | 1 (85)                       | NA             | +                | No Study                    |                              |                |                  | No Study                     |                              |                |                  |  |
| Acupuncture plus Exercise versus Exercise         |                                           |                              |                |                  |                          |                              |                |                  | 0.09 (-0.30, 0.48)          | 1 (106)                      | NA             | +                | -0.03 (-0.33, 0.38)          | 1 (121)                      | NA             | +                |  |
| Electro-Acupuncture plus Exercise versus Exercise |                                           |                              |                |                  |                          |                              |                |                  | -0.07 (-0.46, 0.32)         | 1 (104)                      | NA             | +                | 0.00 (-0.36, 0.36)           | 1 (123)                      | NA             | +                |  |
| Acupuncture vs Sham                               | 0.47 (-0.34, 1.29)                        | 1 (24)                       | NA             | +                | 0.47 (-0.34, 1.29)*      | 1 (24)                       | NA             | +                | <b>-0.69 (-1.25, -0.13)</b> | 1 (52)                       | NA             | +                | <b>-0.69 (-1.25, -0.13)*</b> | 1 (52)                       | NA             | +                |  |
| Laser Acupuncture vs Sham                         | -2.59 (-3.27, -1.90)                      | 1 (62)                       | NA             | +                | -2.59 (-3.27, -1.90)*    | 1 (62)                       | NA             | +                | <b>-2.54 (-3.22, -1.86)</b> | 1 (62)                       | NA             | +                | <b>-2.54 (-3.22, -1.86)*</b> | 1 (62)                       | NA             | +                |  |



| Comparisons | Pain, longest follow-up                   |                              |                |                  | Pain, shortest follow-up |                              |                |                  | Function, longest follow-up |                              |                |                  | Function, shortest follow-up |                              |                |                  |
|-------------|-------------------------------------------|------------------------------|----------------|------------------|--------------------------|------------------------------|----------------|------------------|-----------------------------|------------------------------|----------------|------------------|------------------------------|------------------------------|----------------|------------------|
|             | SMD (95%CI)                               | N                            | I <sup>2</sup> | G                | SMD (95%CI)              | N                            | I <sup>2</sup> | G                | SMD (95%CI)                 | N                            | I <sup>2</sup> | G                | SMD (95%CI)                  | N                            | I <sup>2</sup> | G                |
|             | Negative values favour left-hand therapy. | Comparisons/Trial (Patients) |                | R<br>A<br>D<br>E |                          | Comparisons/Trial (Patients) |                | R<br>A<br>D<br>E |                             | Comparisons/Trial (Patients) |                | R<br>A<br>D<br>E |                              | Comparisons/Trial (Patients) |                | R<br>A<br>D<br>E |

### Microwave

|                                                                   |                     |        |    |   |                     |        |    |   |                    |       |    |   |                             |        |    |   |
|-------------------------------------------------------------------|---------------------|--------|----|---|---------------------|--------|----|---|--------------------|-------|----|---|-----------------------------|--------|----|---|
| Microwave plus Heat plus Exercise vs Exercise plus Sham Microwave | -0.36 (-0.99, 0.26) | 1 (40) | NA | + | -0.21 (-0.83, 0.41) | 1 (40) | NA | + | 0.46 (-0.16, 1.09) | 1(40) | NA | + | 1.24 (0.56, 1.93)           | 1 (40) | NA | + |
| Microwave vs Corticosteroid Injection                             | 0.35 (-0.06, 0.76)  | 1 (92) | NA | + | 0.29 (-0.12, 0.70)  | 1 (92) | NA | + | 0.11 (-0.30, 0.52) | 1(92) | NA | + | <b>-0.47 (-0.88, -0.05)</b> | 1 (92) | NA | + |

### Myofascial Trigger Point Therapy

|                                                                          |                             |        |    |   |                              |        |    |   |                             |        |    |   |                              |        |    |   |
|--------------------------------------------------------------------------|-----------------------------|--------|----|---|------------------------------|--------|----|---|-----------------------------|--------|----|---|------------------------------|--------|----|---|
| Myofascial Trigger Point Therapy vs Waiting List                         | <b>-0.67 (-1.18, -0.17)</b> | 1 (65) | NA | + | <b>-0.67 (-1.18, -0.17)*</b> | 1 (65) | NA | + | <b>-0.58 (-1.06, -0.11)</b> | 1(72)  | NA | + | <b>-0.58 (-1.06, -0.11)*</b> | 1(72)  | NA | + |
| Myofascial Trigger Point Therapy vs Ultrasound                           | <b>-1.84 (-2.71, -0.97)</b> | 1 (30) | NA | + | <b>-1.84 (-2.71, -0.97)*</b> | 1 (30) | NA | + | No Study                    |        |    |   | No Study                     |        |    |   |
| Myofascial Trigger Point Dry Needling plus Exercise versus Exercise only | -0.07 (-0.64, 0.50)         | 1 (46) | NA | + | -0.04 (-0.59, 0.51)          | 1 (50) | NA | + | <b>-1.74 (-2.42, -1.06)</b> | 1 (50) | NA | + | <b>-3.58 (-4.50, -2.67)</b>  | 1 (50) | NA | + |

| Comparisons                                    | Pain, longest follow-up                   |                              |                |                  | Pain, shortest follow-up |                              |                |                  | Function, longest follow-up |                              |                |                  | Function, shortest follow-up |                              |                |                  |
|------------------------------------------------|-------------------------------------------|------------------------------|----------------|------------------|--------------------------|------------------------------|----------------|------------------|-----------------------------|------------------------------|----------------|------------------|------------------------------|------------------------------|----------------|------------------|
|                                                | SMD (95%CI)                               | N                            | I <sup>2</sup> | G                | SMD (95%CI)              | N                            | I <sup>2</sup> | G                | SMD (95%CI)                 | N                            | I <sup>2</sup> | G                | SMD (95%CI)                  | N                            | I <sup>2</sup> | G                |
|                                                | Negative values favour left-hand therapy. | Comparisons/Trial (Patients) |                | R<br>A<br>D<br>E |                          | Comparisons/Trial (Patients) |                | R<br>A<br>D<br>E |                             | Comparisons/Trial (Patients) |                | R<br>A<br>D<br>E |                              | Comparisons/Trial (Patients) |                | R<br>A<br>D<br>E |
| Myofascial Trigger Point versus Manual Therapy | -0.18 (-0.81, 0.46)                       | 1 (38)                       | NA             | +                | -0.18 (-0.81, 0.46)*     | 1 (38)                       | NA             | +                | 0.00 (-0.63, 0.64)          | 1 (38)                       | NA             | +                | 0.00 (-0.63, 0.64)*          | 1 (38)                       | NA             | +                |

### Comprehensive Physiotherapy

|                                                                                             |          |  |  |  |          |  |  |  |                      |        |    |   |                       |       |    |   |
|---------------------------------------------------------------------------------------------|----------|--|--|--|----------|--|--|--|----------------------|--------|----|---|-----------------------|-------|----|---|
| Comprehensive Physiotherapy (Manual Therapy / Exercise and other modalities as appropriate) | No Study |  |  |  | No Study |  |  |  | -1.32 (-1.83, -0.80) | 1 (73) | NA | + | -1.32 (-1.83, -0.80)* | 1(73) | NA | + |
|---------------------------------------------------------------------------------------------|----------|--|--|--|----------|--|--|--|----------------------|--------|----|---|-----------------------|-------|----|---|

### Others

|                                      |                      |        |    |   |                      |       |    |   |                      |       |    |   |                     |        |    |   |
|--------------------------------------|----------------------|--------|----|---|----------------------|-------|----|---|----------------------|-------|----|---|---------------------|--------|----|---|
| Platelet Rich Plasma vs Dry Needling | -0.82 (-1.57, -0.07) | 1 (30) | NA | + | -0.76 (-1.45, -0.07) | 1(35) | NA | + | -0.75 (-1.49, -0.00) | 1(30) | NA | + | -0.13 (-0.76, 0.50) | 1 (39) | NA | + |
|--------------------------------------|----------------------|--------|----|---|----------------------|-------|----|---|----------------------|-------|----|---|---------------------|--------|----|---|

### Interferential Light Therapy

| Comparisons                                                                  | Pain, longest follow-up                   |                              |                |                  | Pain, shortest follow-up     |                              |                |                  | Function, longest follow-up |                              |                |                  | Function, shortest follow-up |                              |                |                  |
|------------------------------------------------------------------------------|-------------------------------------------|------------------------------|----------------|------------------|------------------------------|------------------------------|----------------|------------------|-----------------------------|------------------------------|----------------|------------------|------------------------------|------------------------------|----------------|------------------|
|                                                                              | SMD (95%CI)                               | N                            | I <sup>2</sup> | G                | SMD (95%CI)                  | N                            | I <sup>2</sup> | G                | SMD (95%CI)                 | N                            | I <sup>2</sup> | G                | SMD (95%CI)                  | N                            | I <sup>2</sup> | G                |
|                                                                              | Negative values favour left-hand therapy. | Comparisons/Trial (Patients) |                | R<br>A<br>D<br>E |                              | Comparisons/Trial (Patients) |                | R<br>A<br>D<br>E |                             | Comparisons/Trial (Patients) |                | R<br>A<br>D<br>E |                              | Comparisons/Trial (Patients) |                | R<br>A<br>D<br>E |
| Interferential Light Therapy vs Conventional Light Therapy                   | -0.12 (-0.89, 0.64)                       | 1 (26)                       | NA             | +                | -0.12 (-0.89, 0.64)*         | 1 (26)                       | NA             | +                | 0.42 (-0.35, 1.20)          | 1(26)                        | NA             | +                | 0.42 (-0.35, 1.20)*          | 1(26)                        | NA             | +                |
| <b>Massage</b>                                                               |                                           |                              |                |                  |                              |                              |                |                  |                             |                              |                |                  |                              |                              |                |                  |
| Tensegrity Massage vs Classic Swedish Massage                                | <b>-0.76 (-1.50, -0.01)</b>               | 1 (30)                       | NA             | +                | <b>-0.76 (-1.50, -0.01)*</b> | 1 (30)                       | NA             | +                | No Study                    |                              |                |                  | No Study                     |                              |                |                  |
| <b>Microcurrent Electrical Stimulation</b>                                   |                                           |                              |                |                  |                              |                              |                |                  |                             |                              |                |                  |                              |                              |                |                  |
| Microcurrent Electrical Stimulation vs Sham Microcurrent Stimulation         | <b>-0.73 (-1.37, -0.09)</b>               | 1 (40)                       | NA             | +                | <b>-0.73 (-1.37, -0.09)*</b> | 1 (40)                       | NA             | +                | <b>-0.94 (-1.59, -0.28)</b> | 1(40)                        | NA             | +                | <b>-0.94 (-1.59, -0.28)*</b> | 1(40)                        | NA             | +                |
| <b>US-guided Percutaneous Electrolysis and eccentric Exercises</b>           |                                           |                              |                |                  |                              |                              |                |                  |                             |                              |                |                  |                              |                              |                |                  |
| US-guided Percutaneous electrolysis and eccentric exercises versus eccentric | <b>-1.08 (-1.78, -0.37)</b>               | 1 (38)                       | NA             | +                | <b>-1.08 (-1.78, -0.37)*</b> | 1 (38)                       | NA             | +                | <b>-0.83 (-1.51, -0.14)</b> | 1(36)                        | NA             | +                | <b>-0.83 (-1.51, -0.14)*</b> | 1(36)                        | NA             | +                |
