# Supplementary material
Source: HighWire-hosted journal article supplement (https://bjsm.bmj.com/content/bjsports-2016-096515)
Supplement: inline-supplementary-material-4 [file inline-supplementary-material-4.pdf]

## Appendix 4a Forest Plots Pain

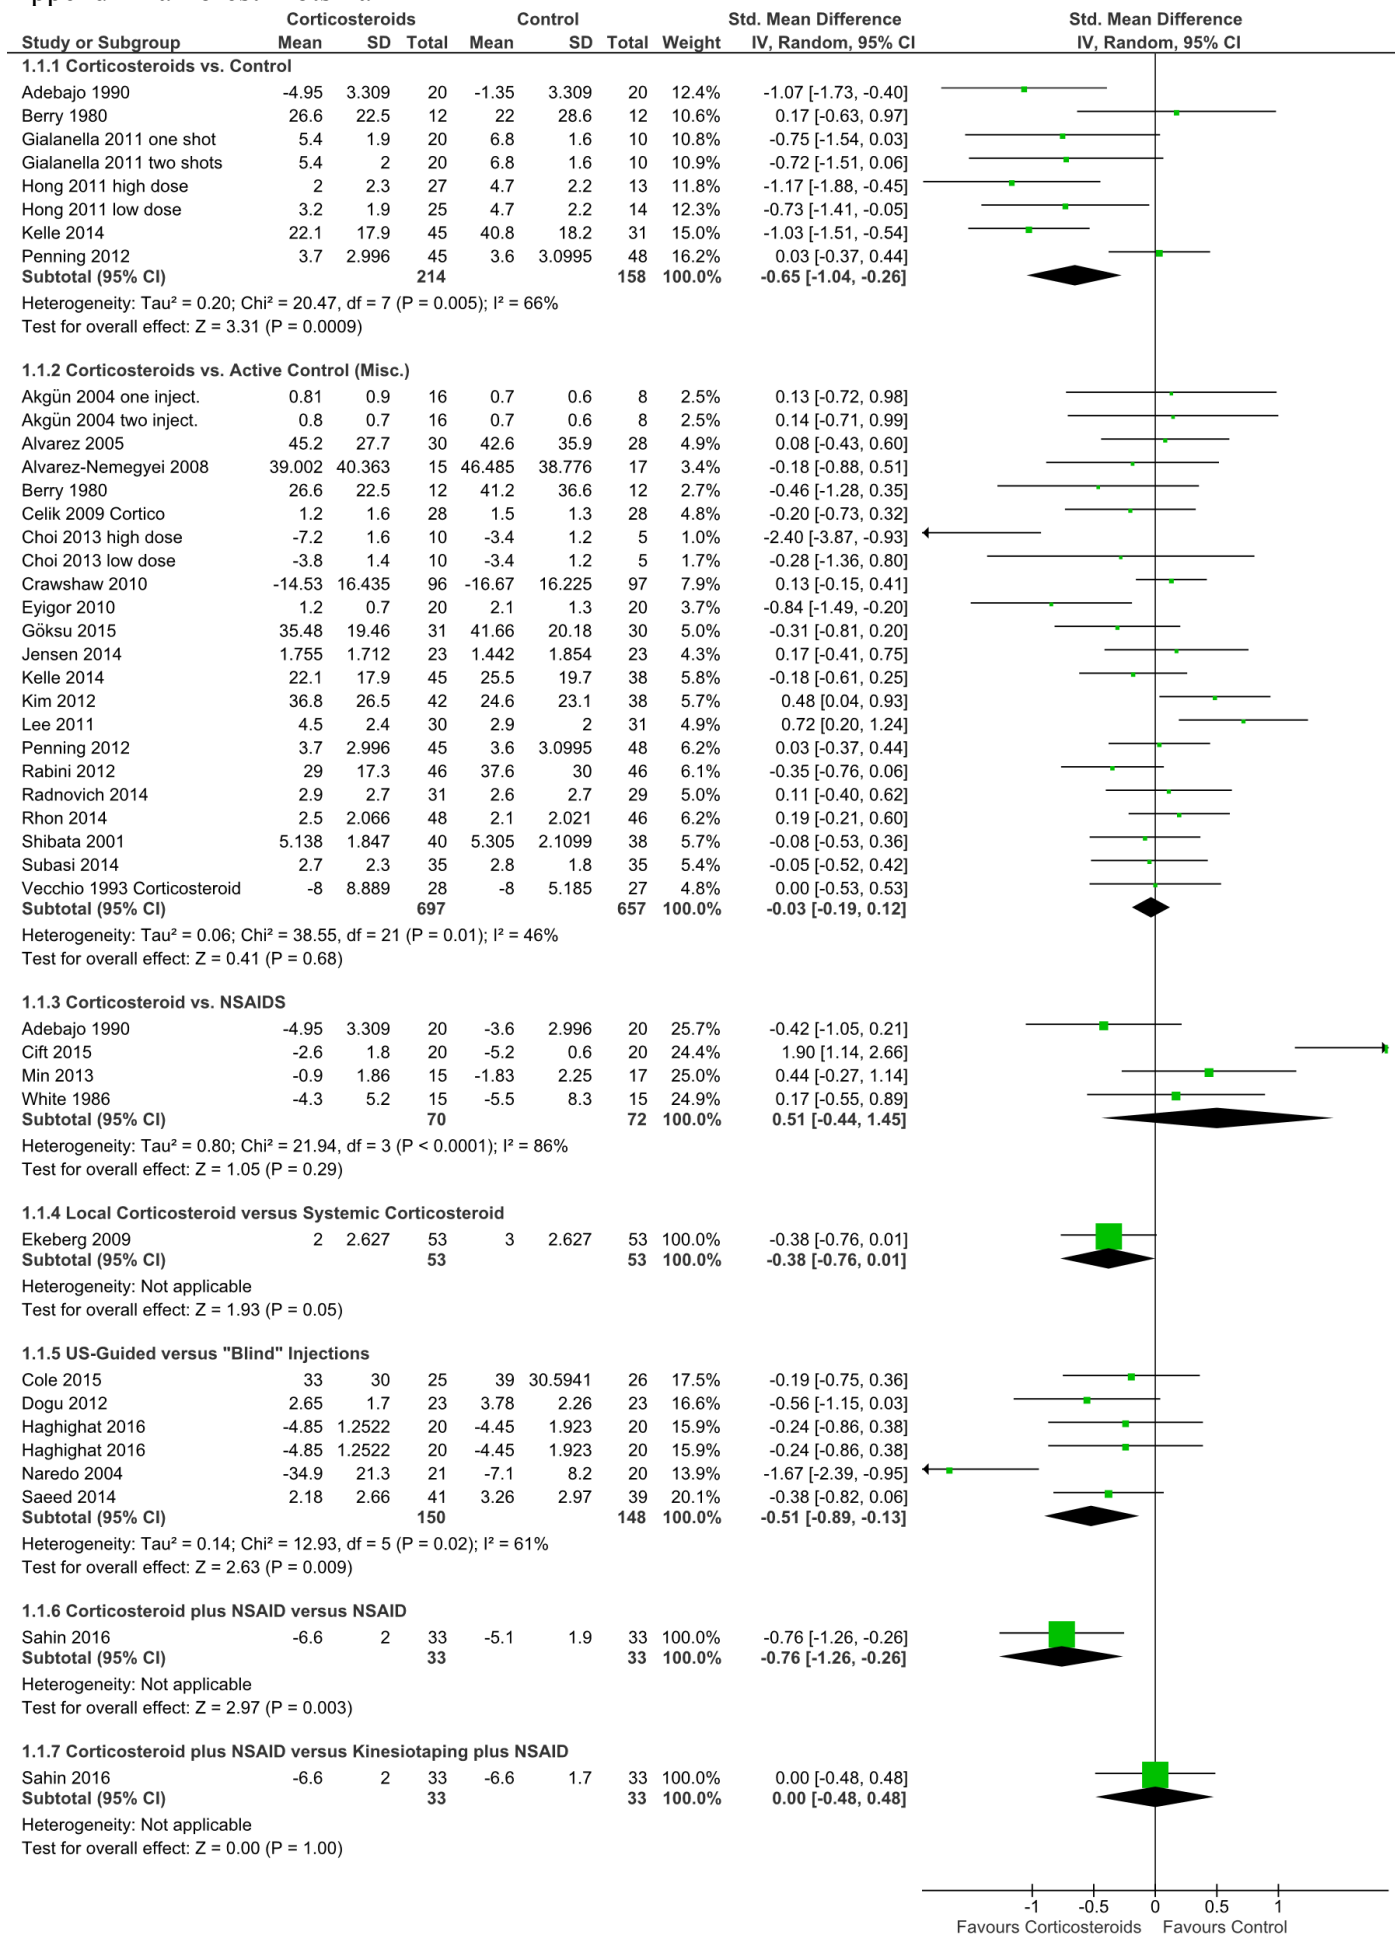

Figure Appendix-4a 1. Steroids: Outcome pain at the longest follow-up

## Appendix 4a Forest Plots Pain

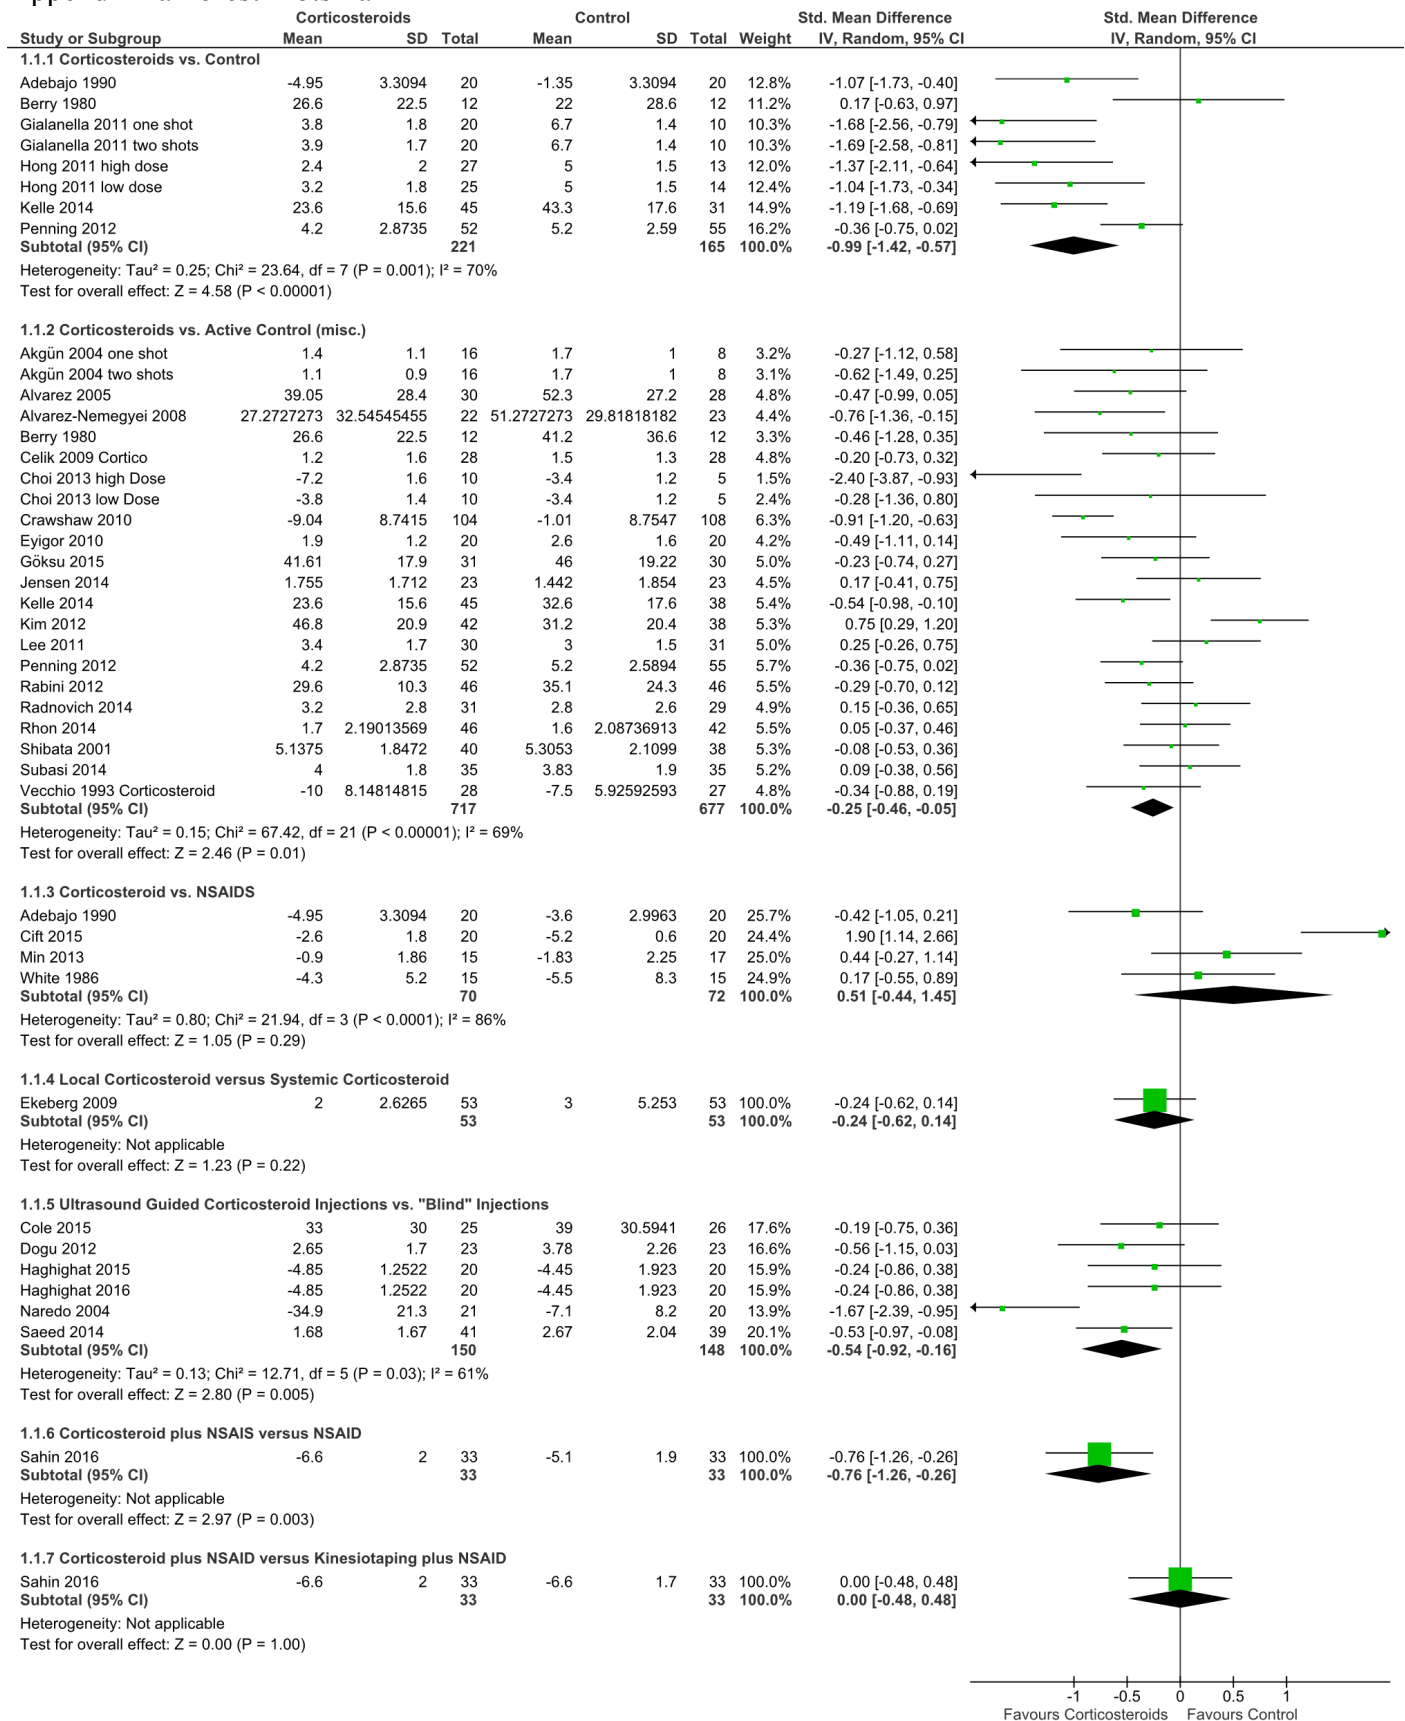

Figure Appendix-4a 2. Steroids: Outcome pain at the shortest follow-up

## Appendix 4a Forest Plots Pain

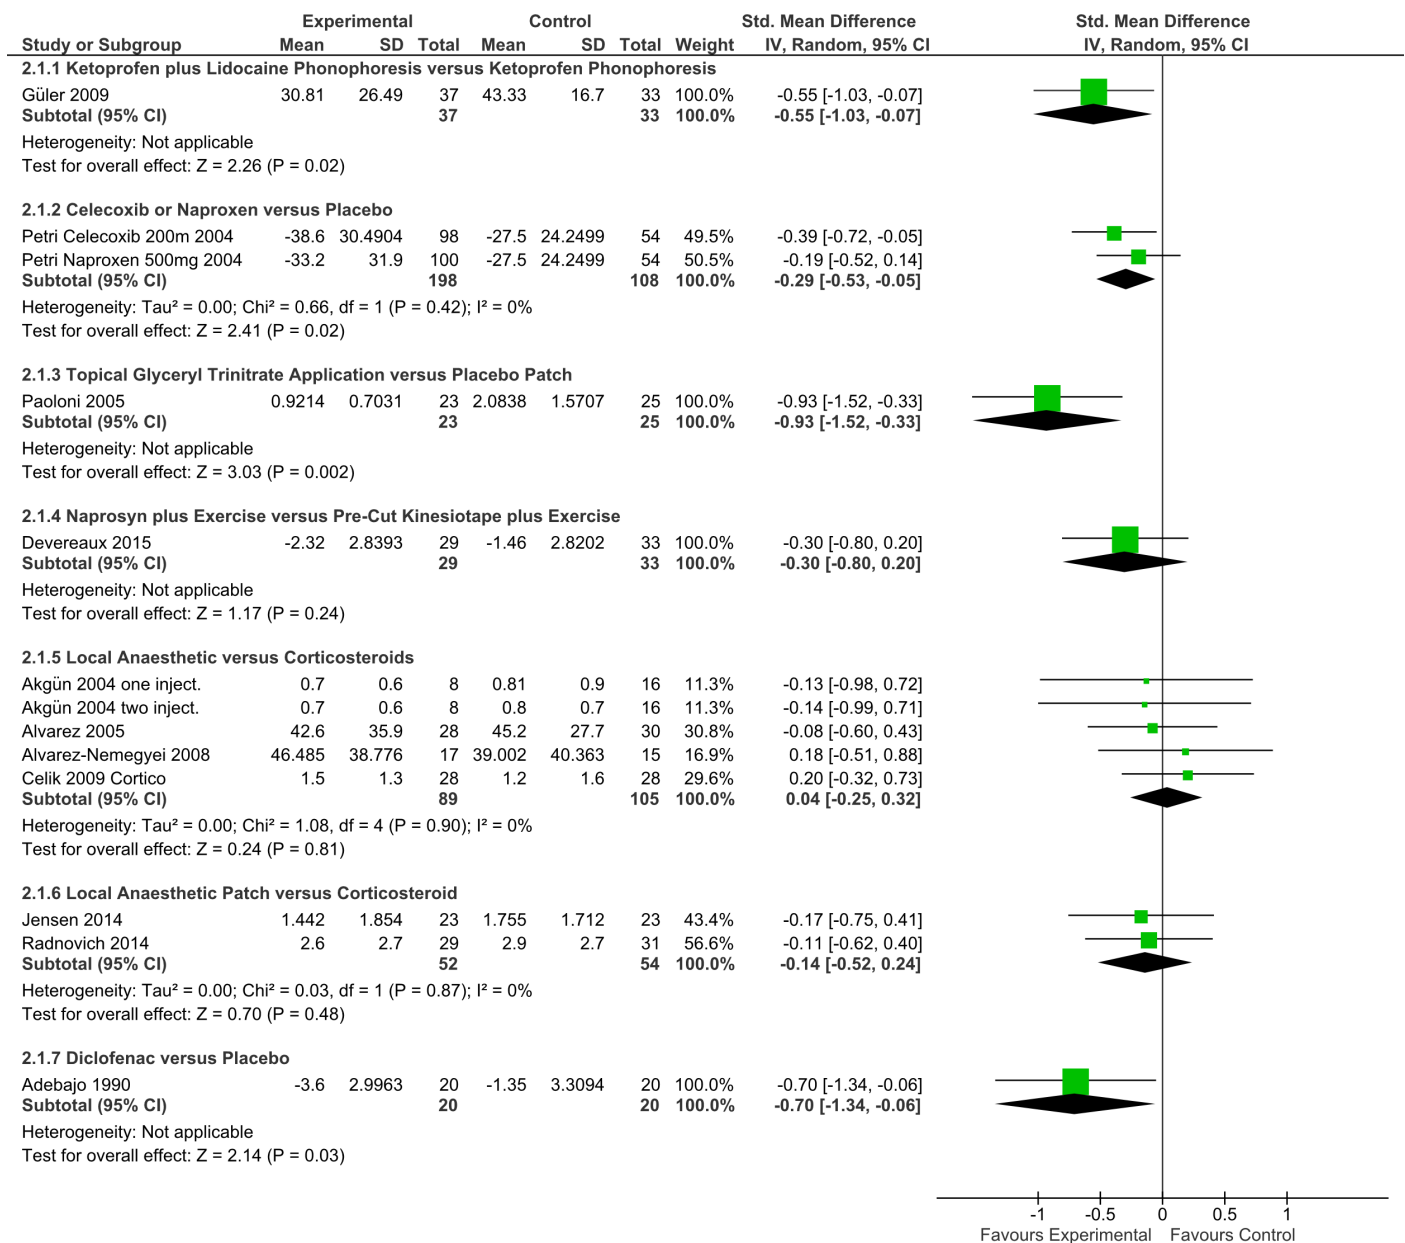

Figure Appendix-4a 3. Medications, and anaesthetic patch: Outcome pain at the longest follow-up

## Appendix 4a Forest Plots Pain

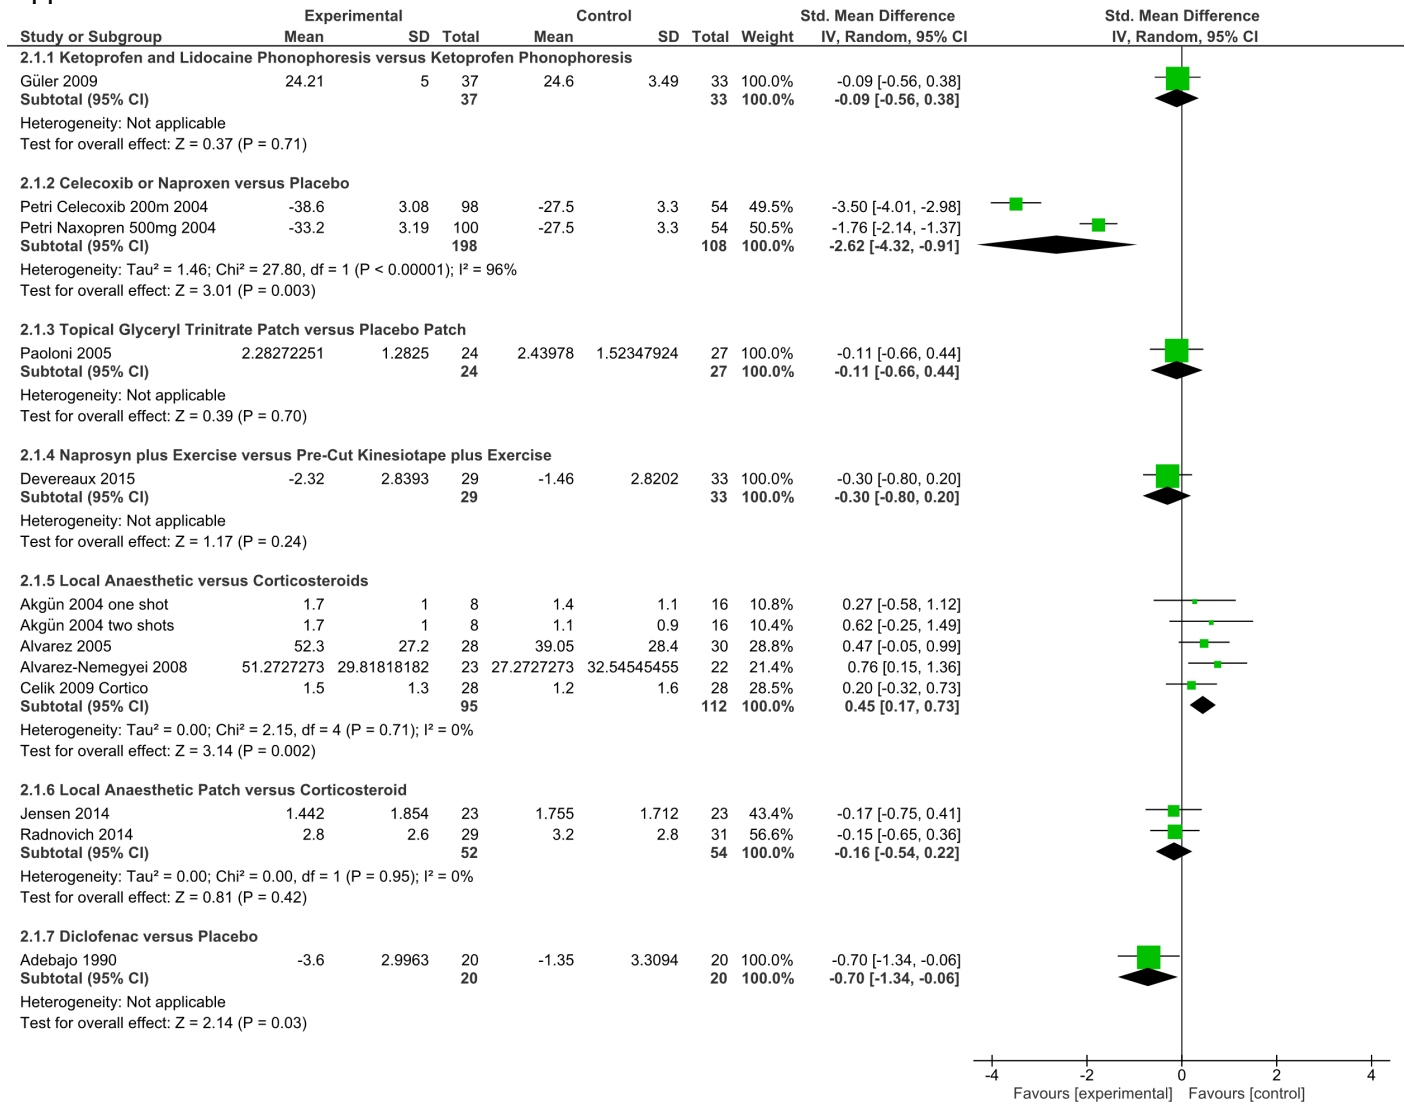

Figure Appendix-4a 4. Medications, and anaesthetic patch: Outcome pain at the shortest follow-up

# Appendix 4a Forest Plots Pain

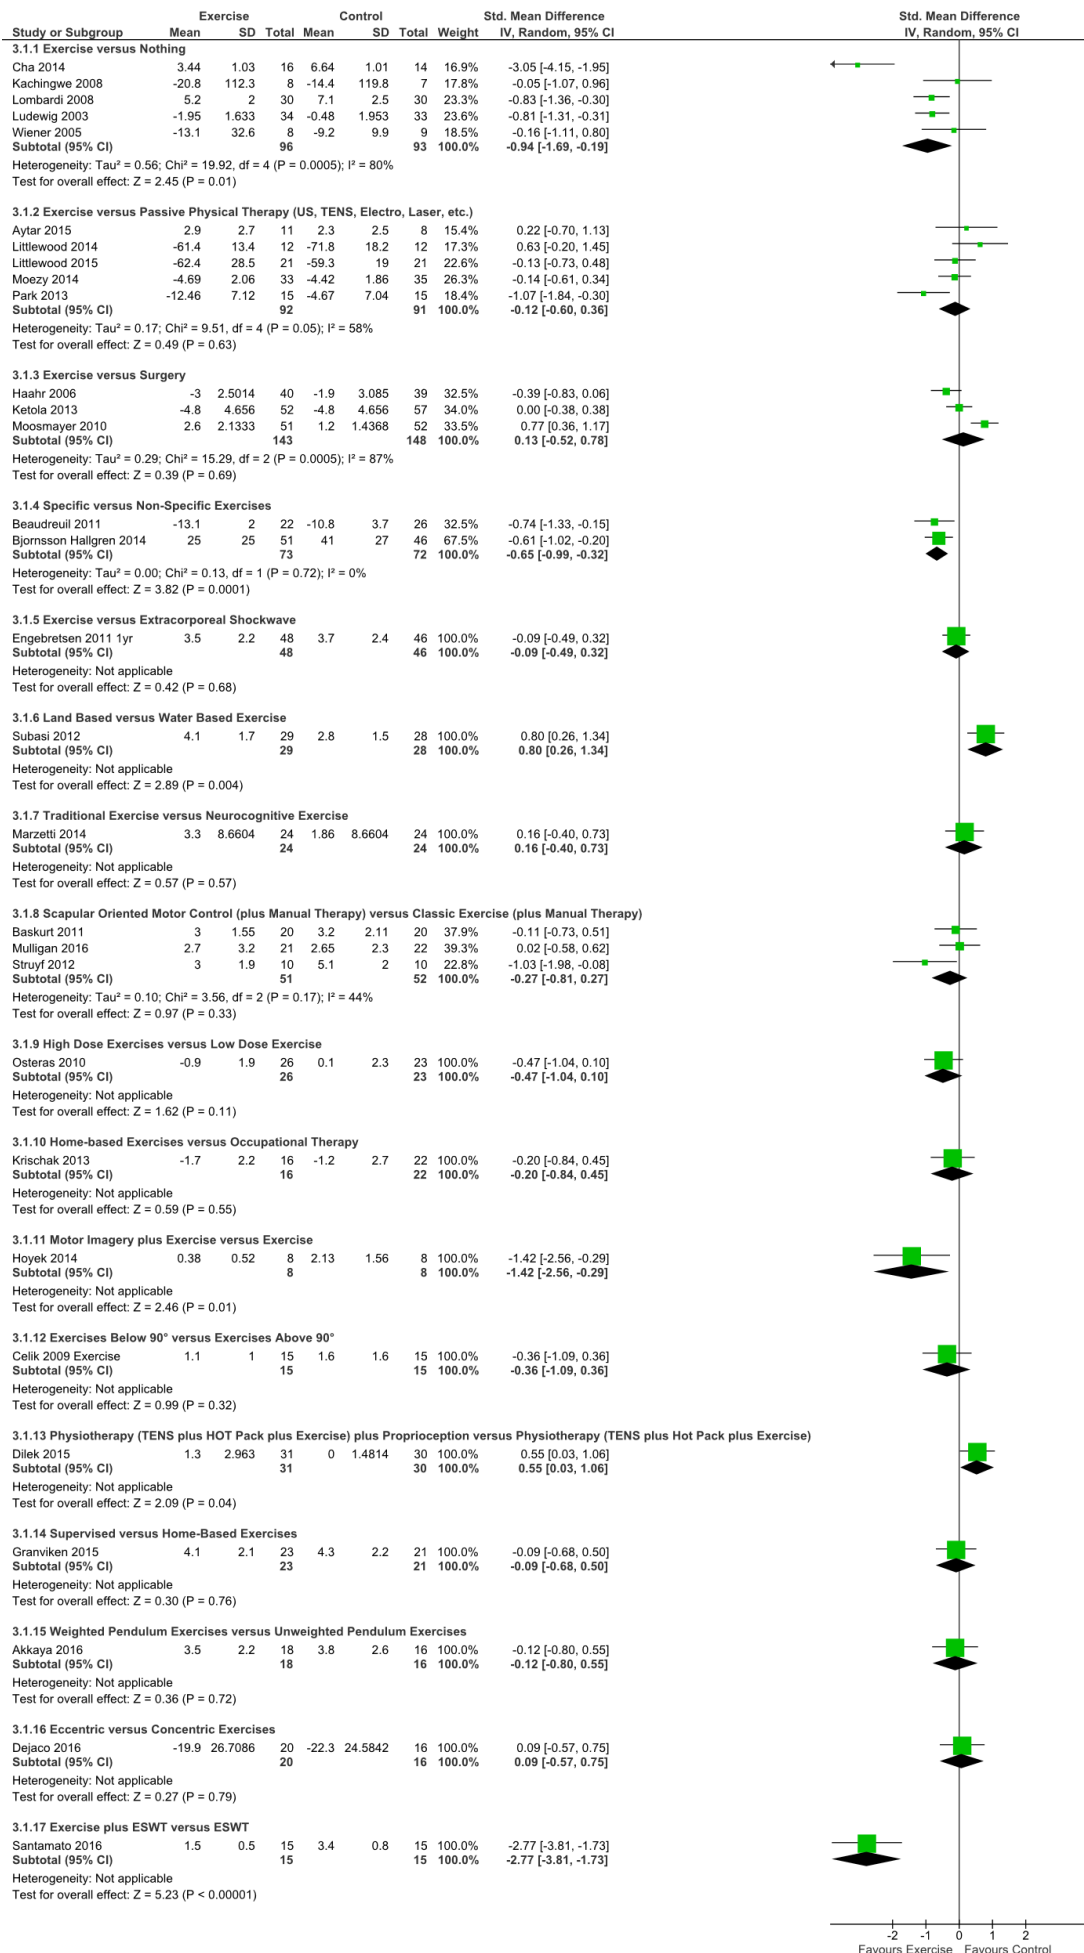

Figure Appendix-4a 5. Exercise: Outcome pain at the longest follow-up

# Appendix 4a Forest Plots Pain

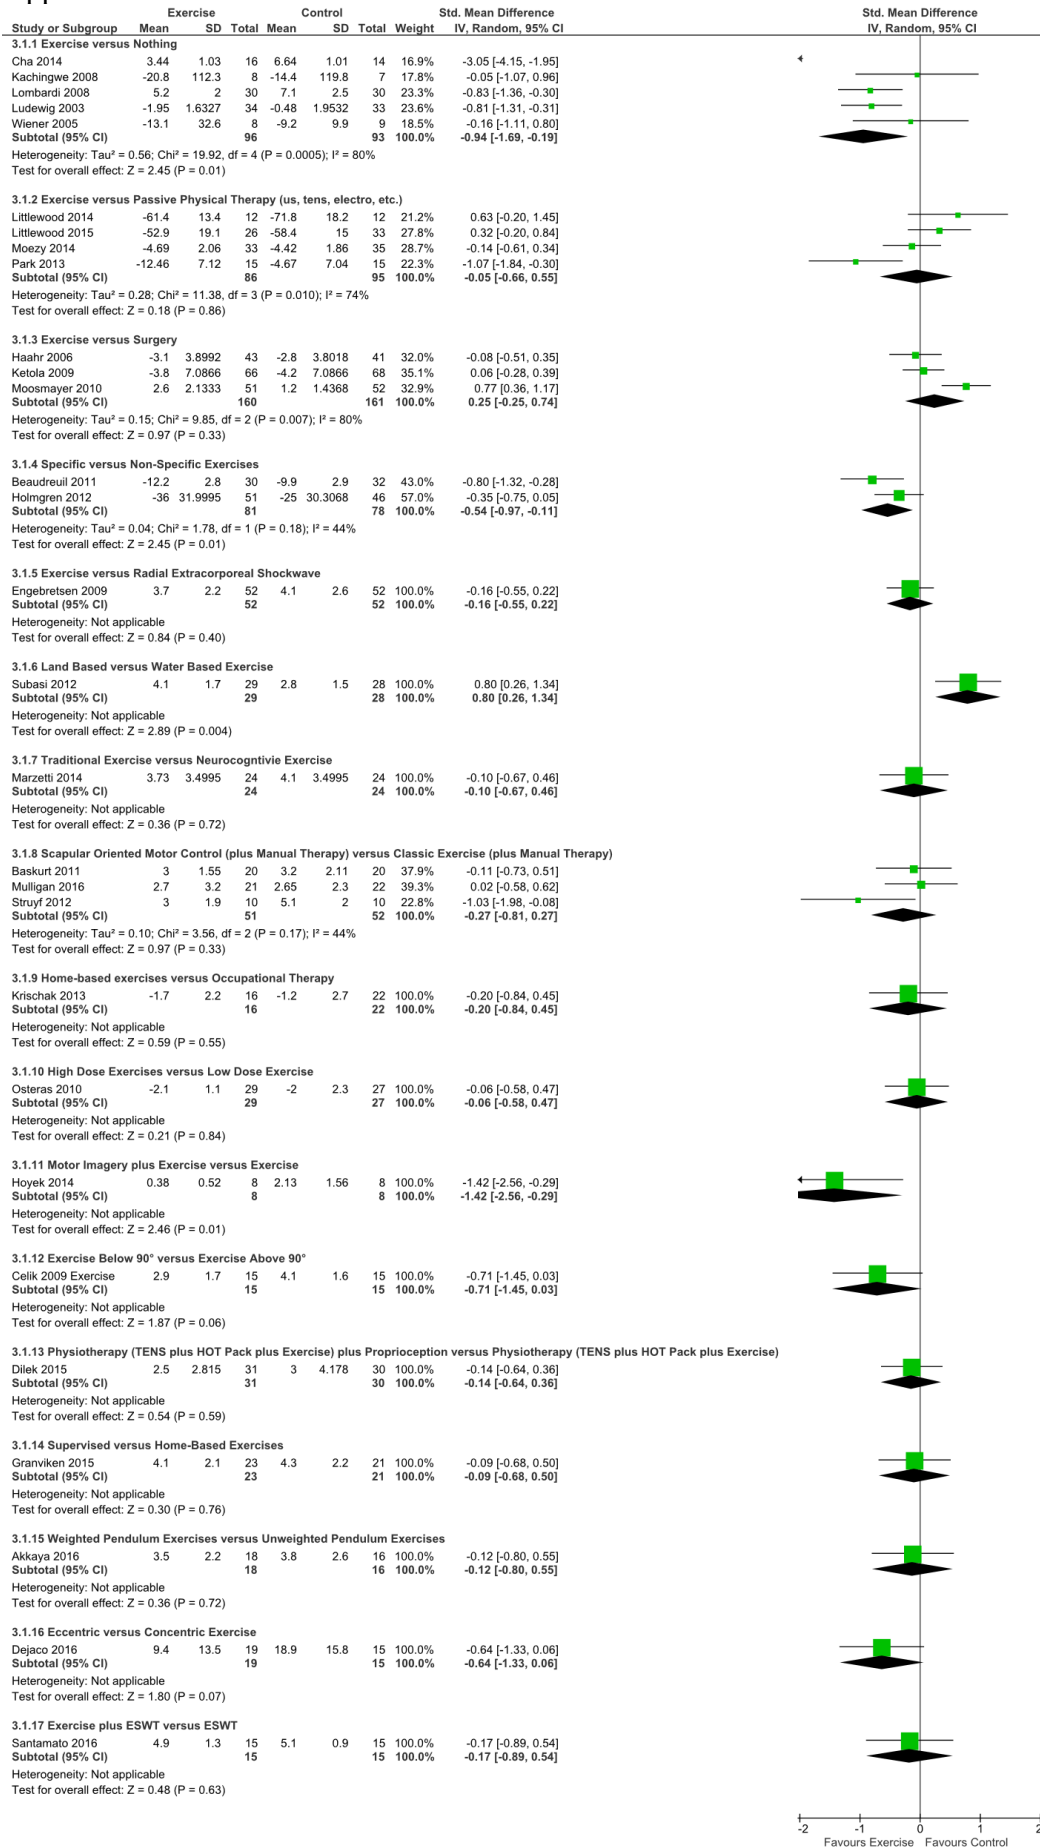

Figure Appendix-4a 6. Exercise: Outcome pain at the shortest follow-up

## Appendix 4a Forest Plots Pain

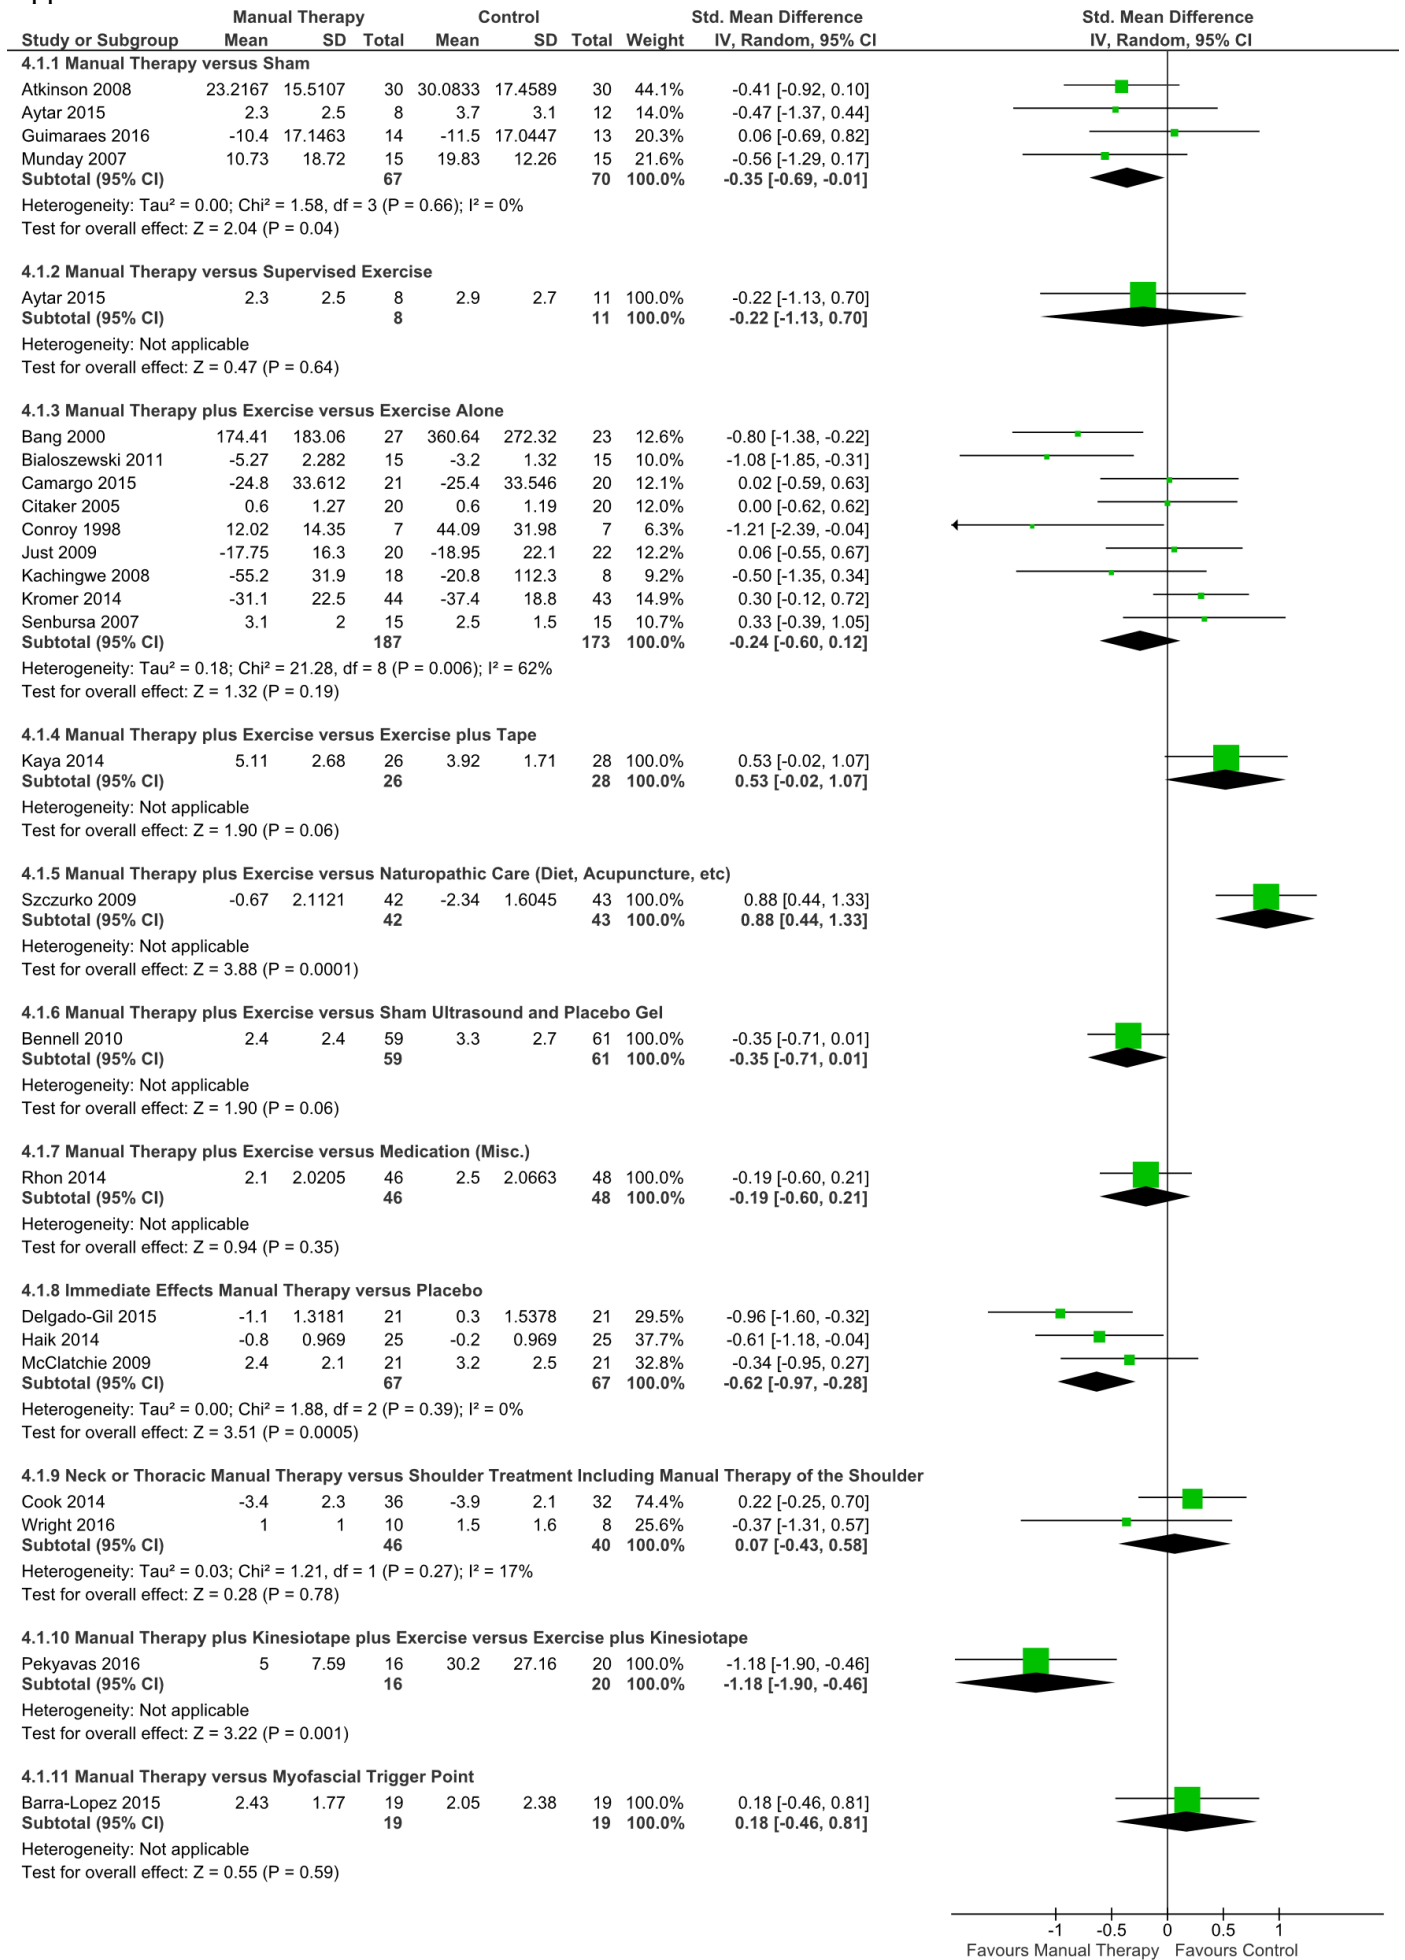

Figure Appendix-4a 7. Manual therapy: Outcome pain at the longest follow-up

## Appendix 4a Forest Plots Pain

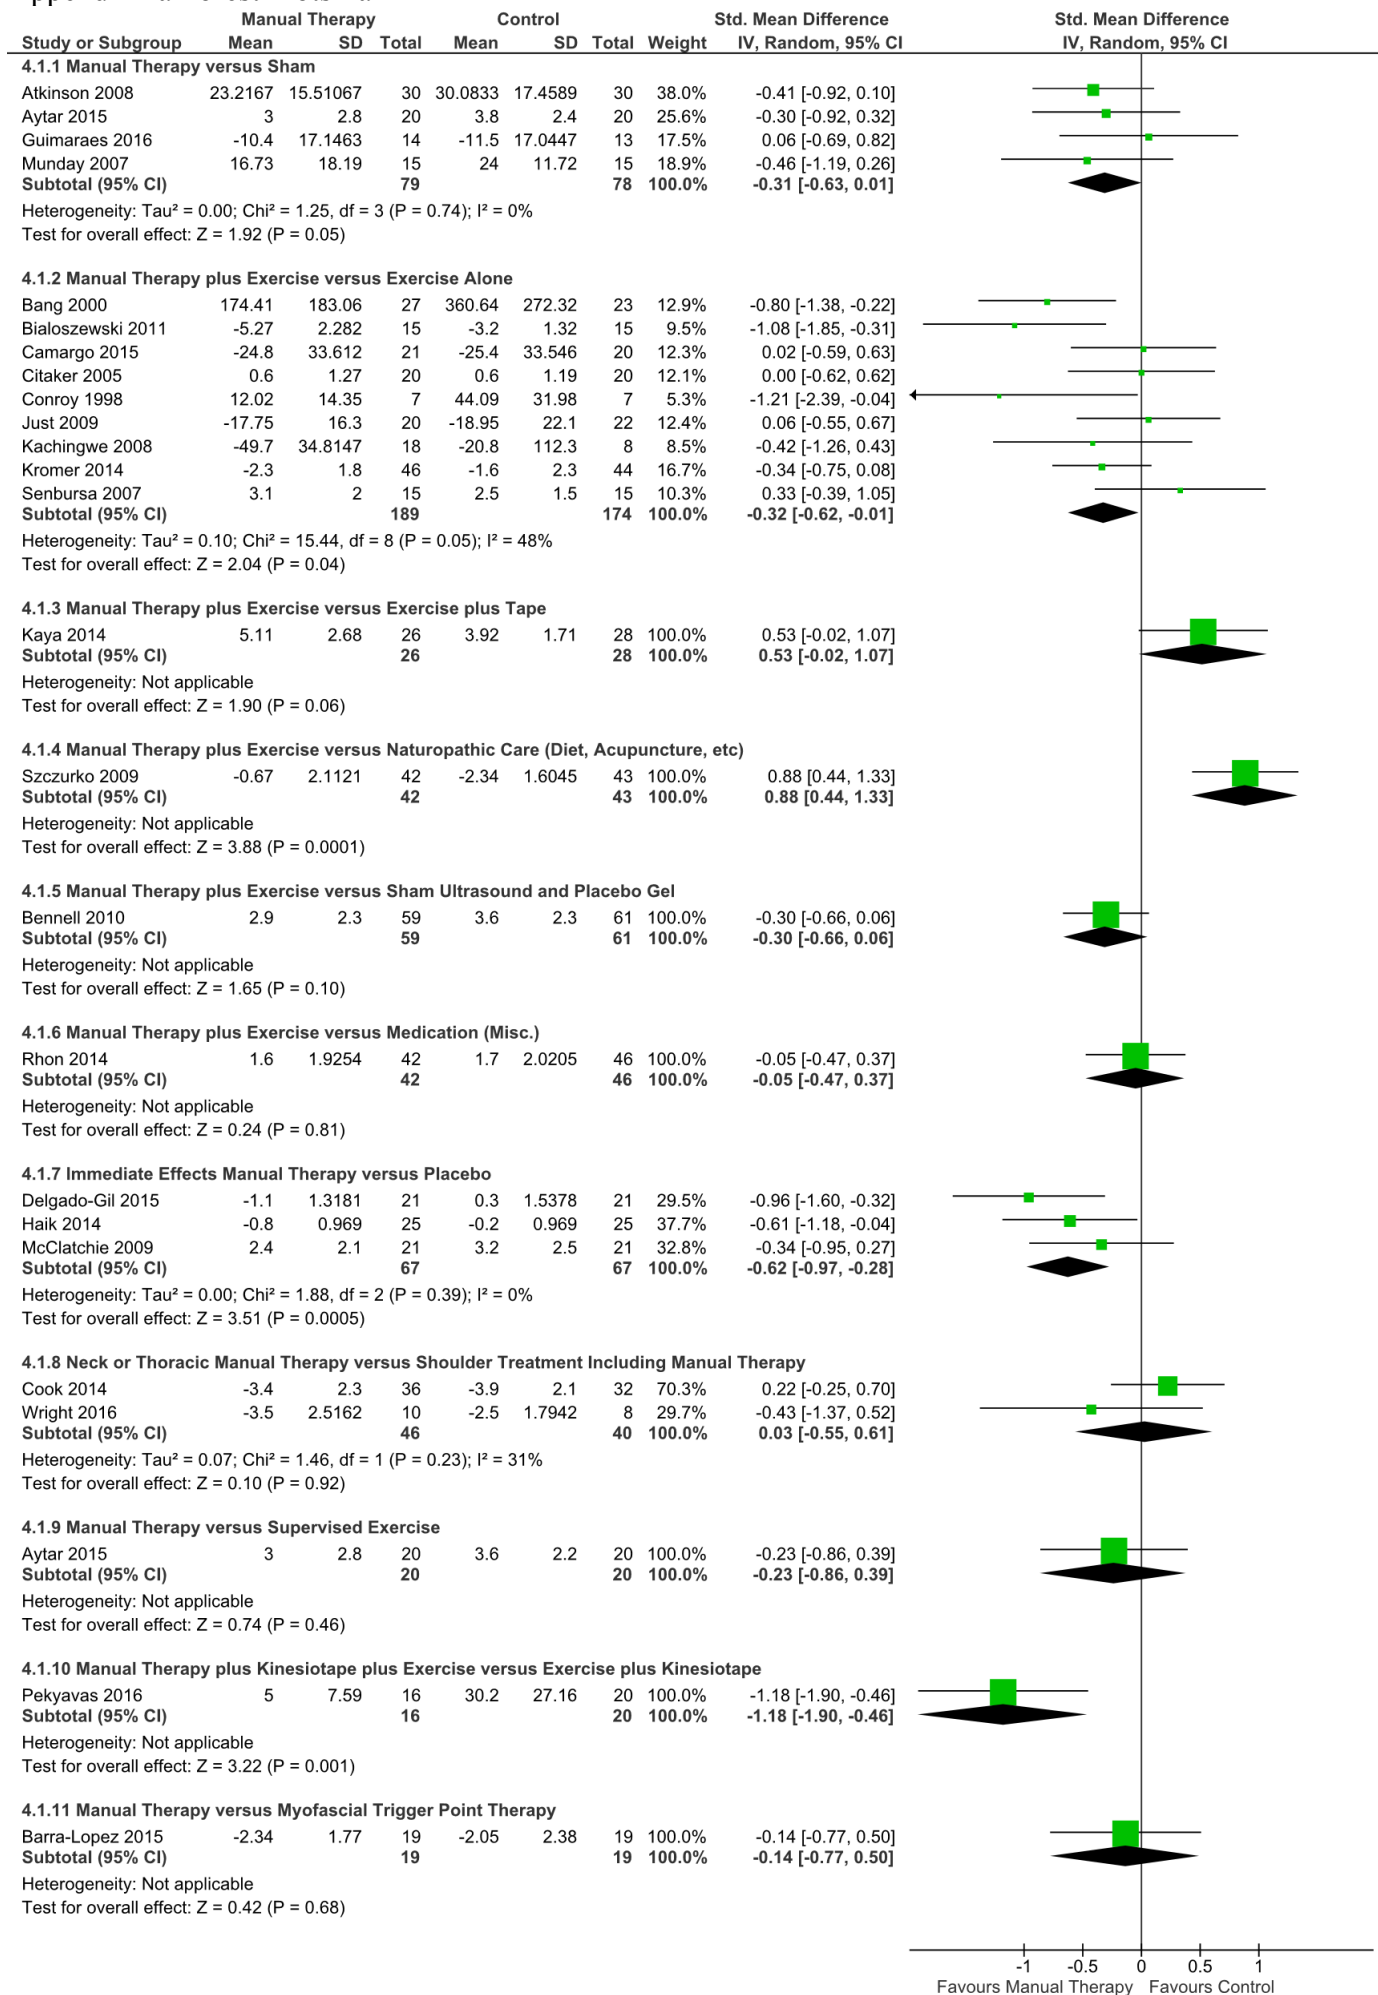

Figure Appendix-4a 8. Manual therapy: Outcome pain at the shortest follow-up



## Appendix 4a Forest Plots Pain

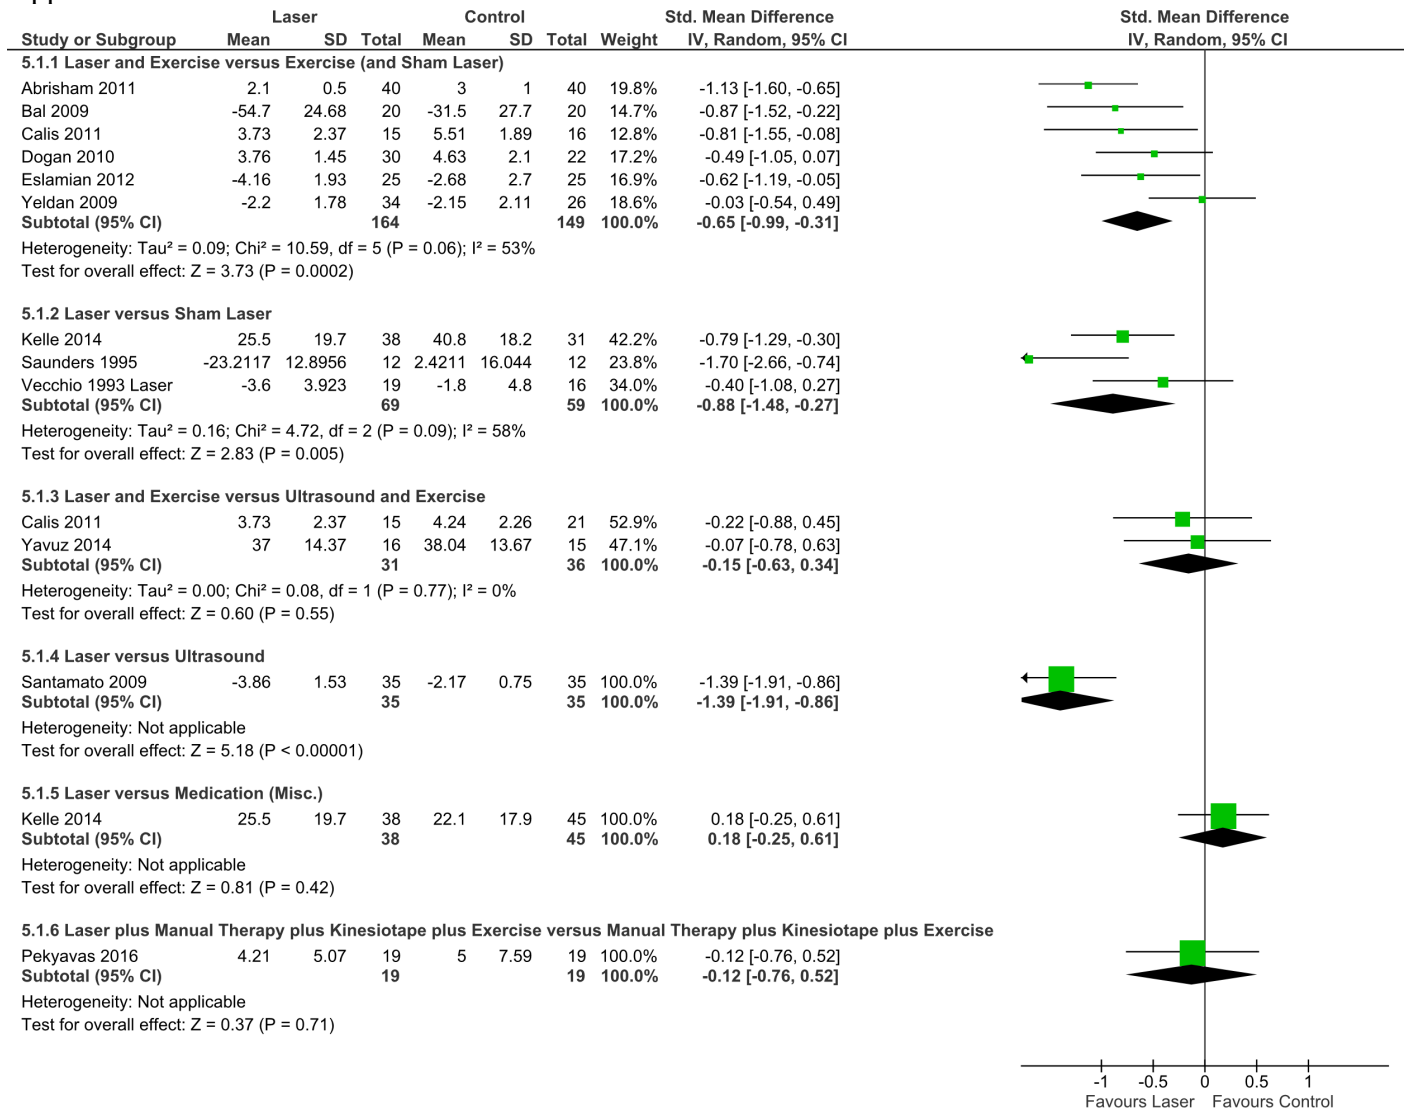

Figure Appendix-4a 9. Laser: Outcome pain at the longest follow-up

## Appendix 4a Forest Plots Pain

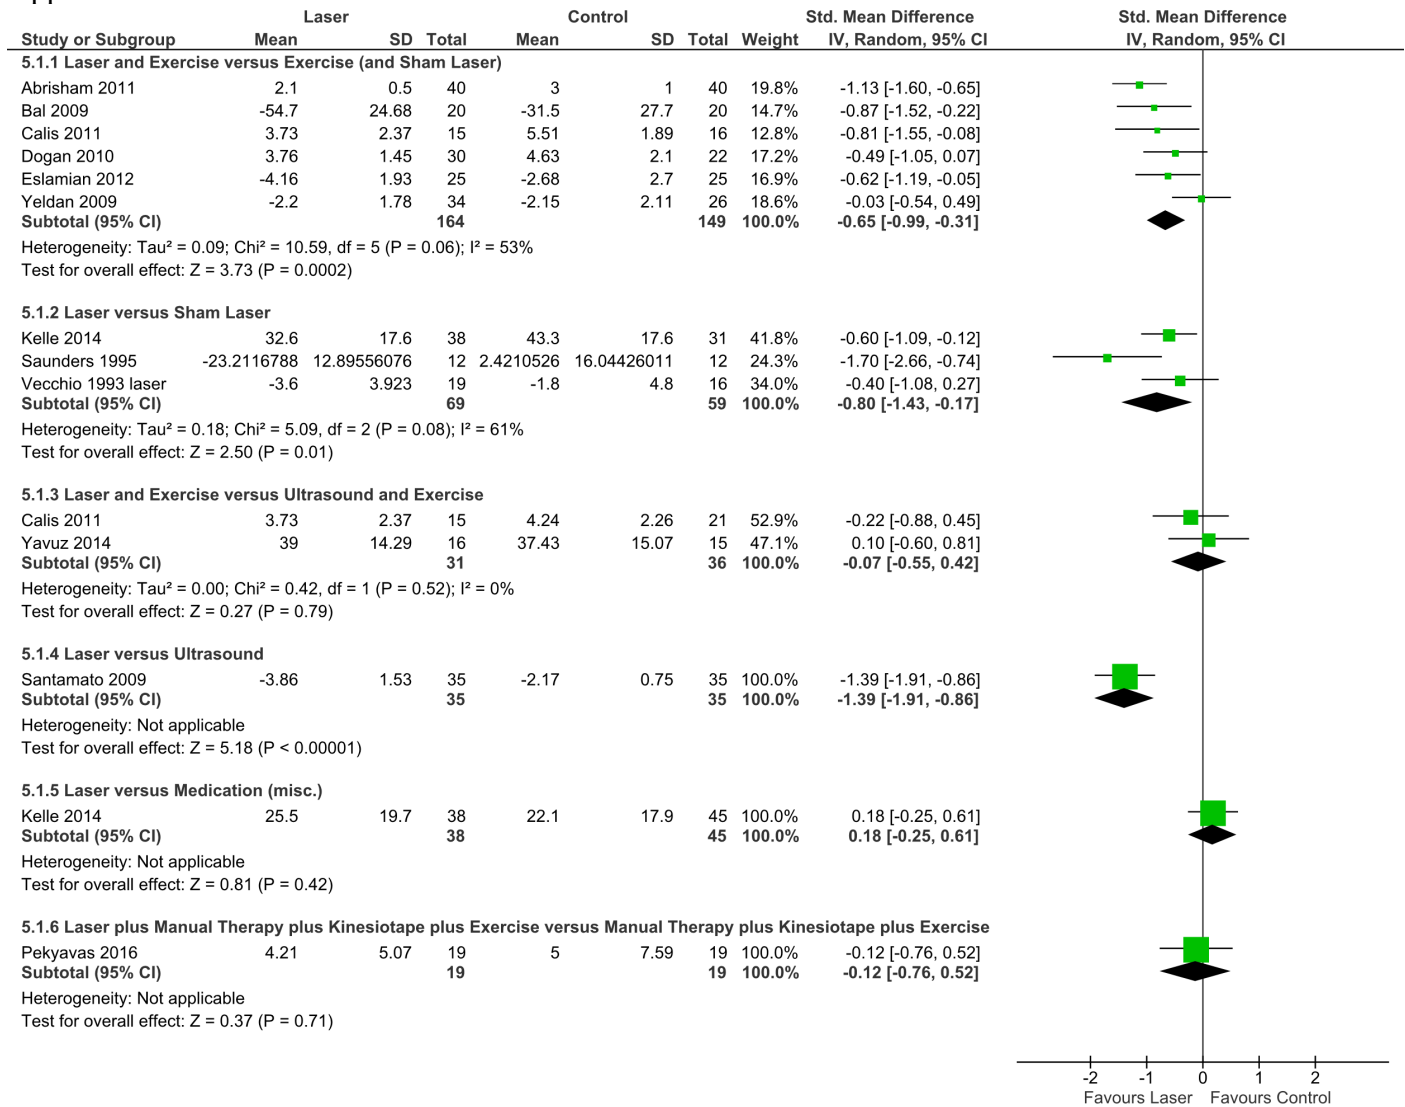

Figure Appendix-4a 10. Laser: Outcome pain at the shortest follow-up

## Appendix 4a Forest Plots Pain

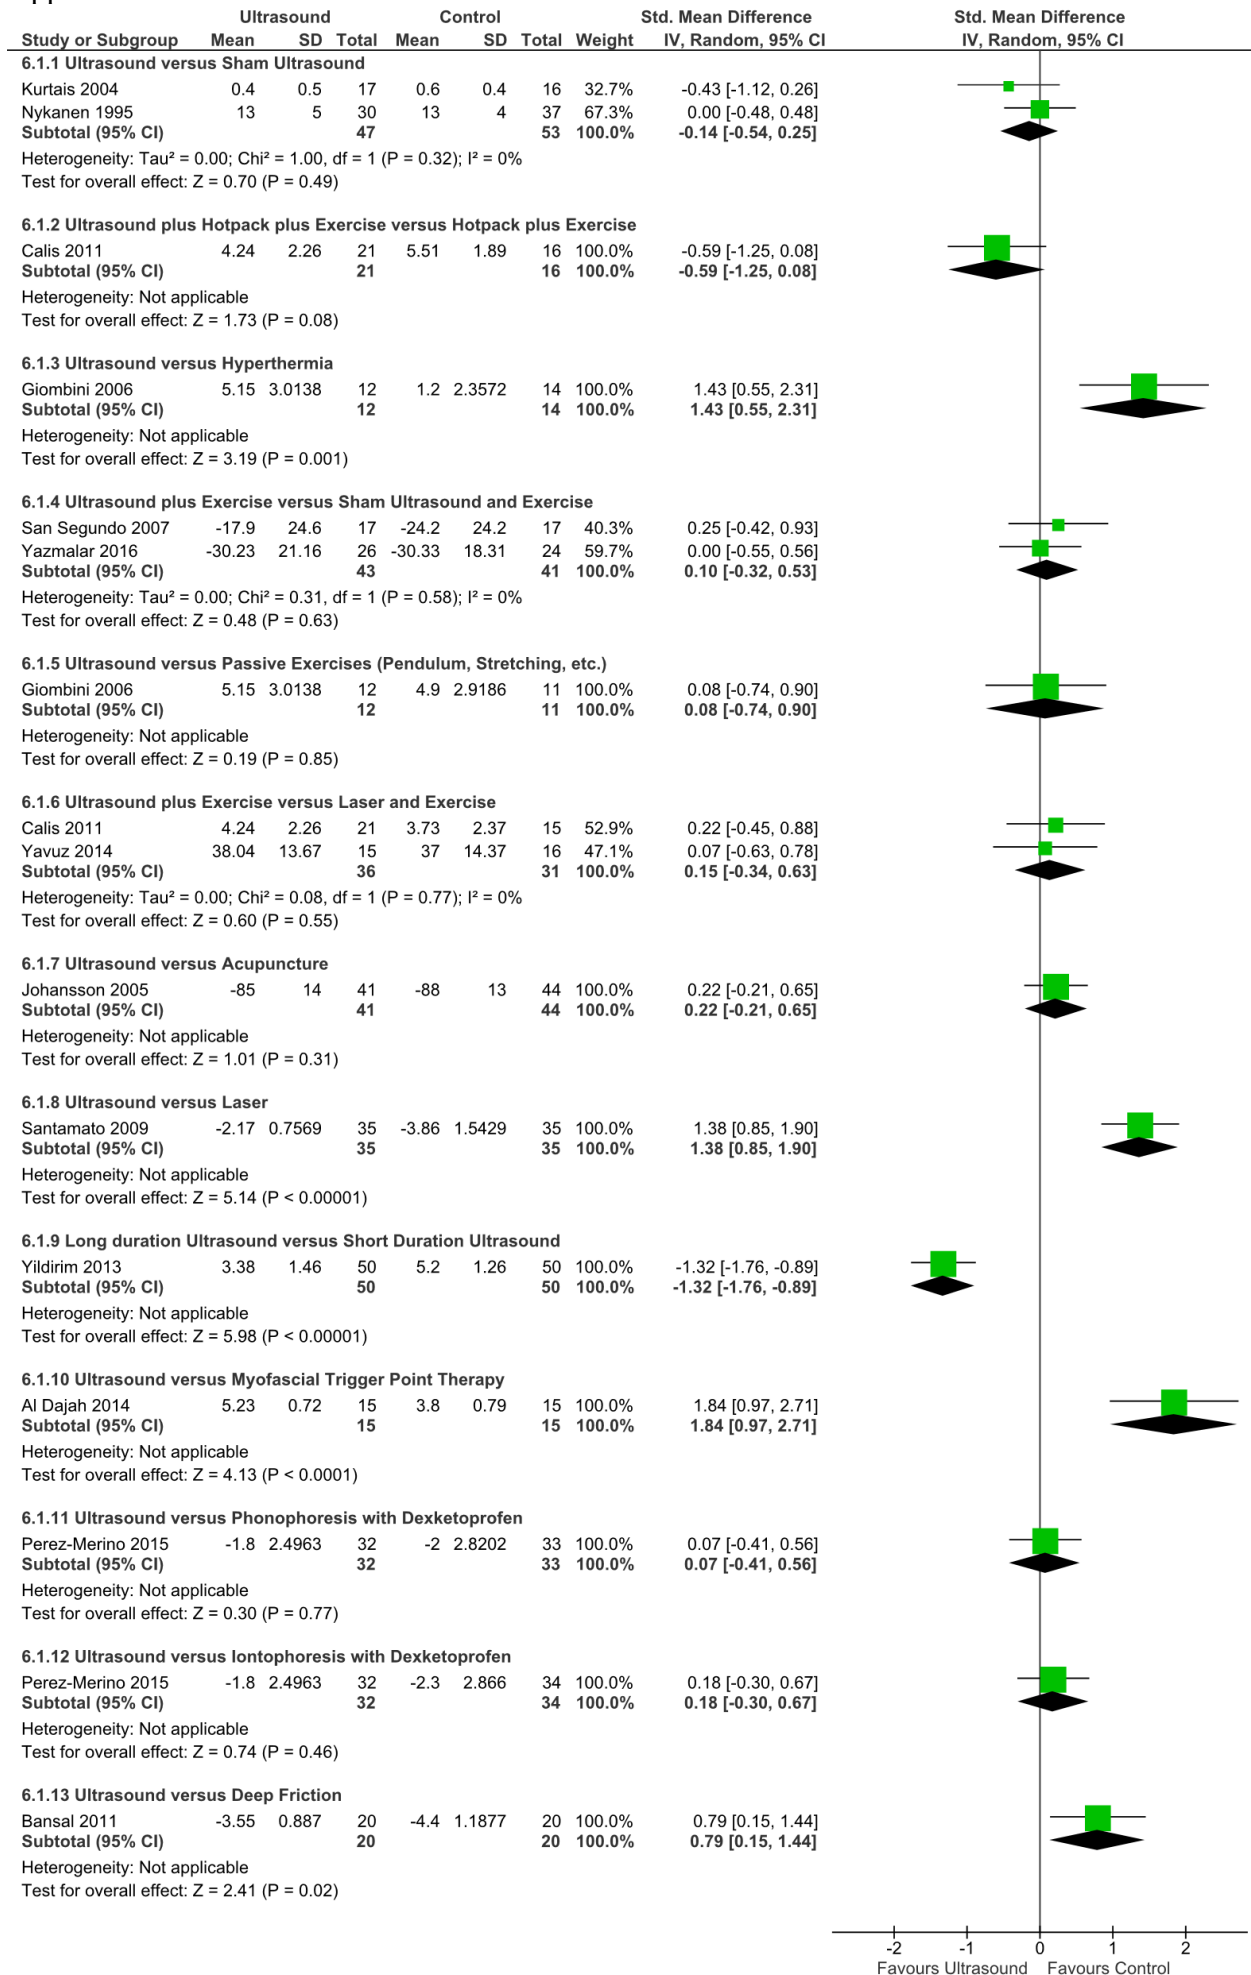

Figure Appendix-4a 11. Ultrasound: Outcome pain at the longest follow-up

## Appendix 4a Forest Plots Pain

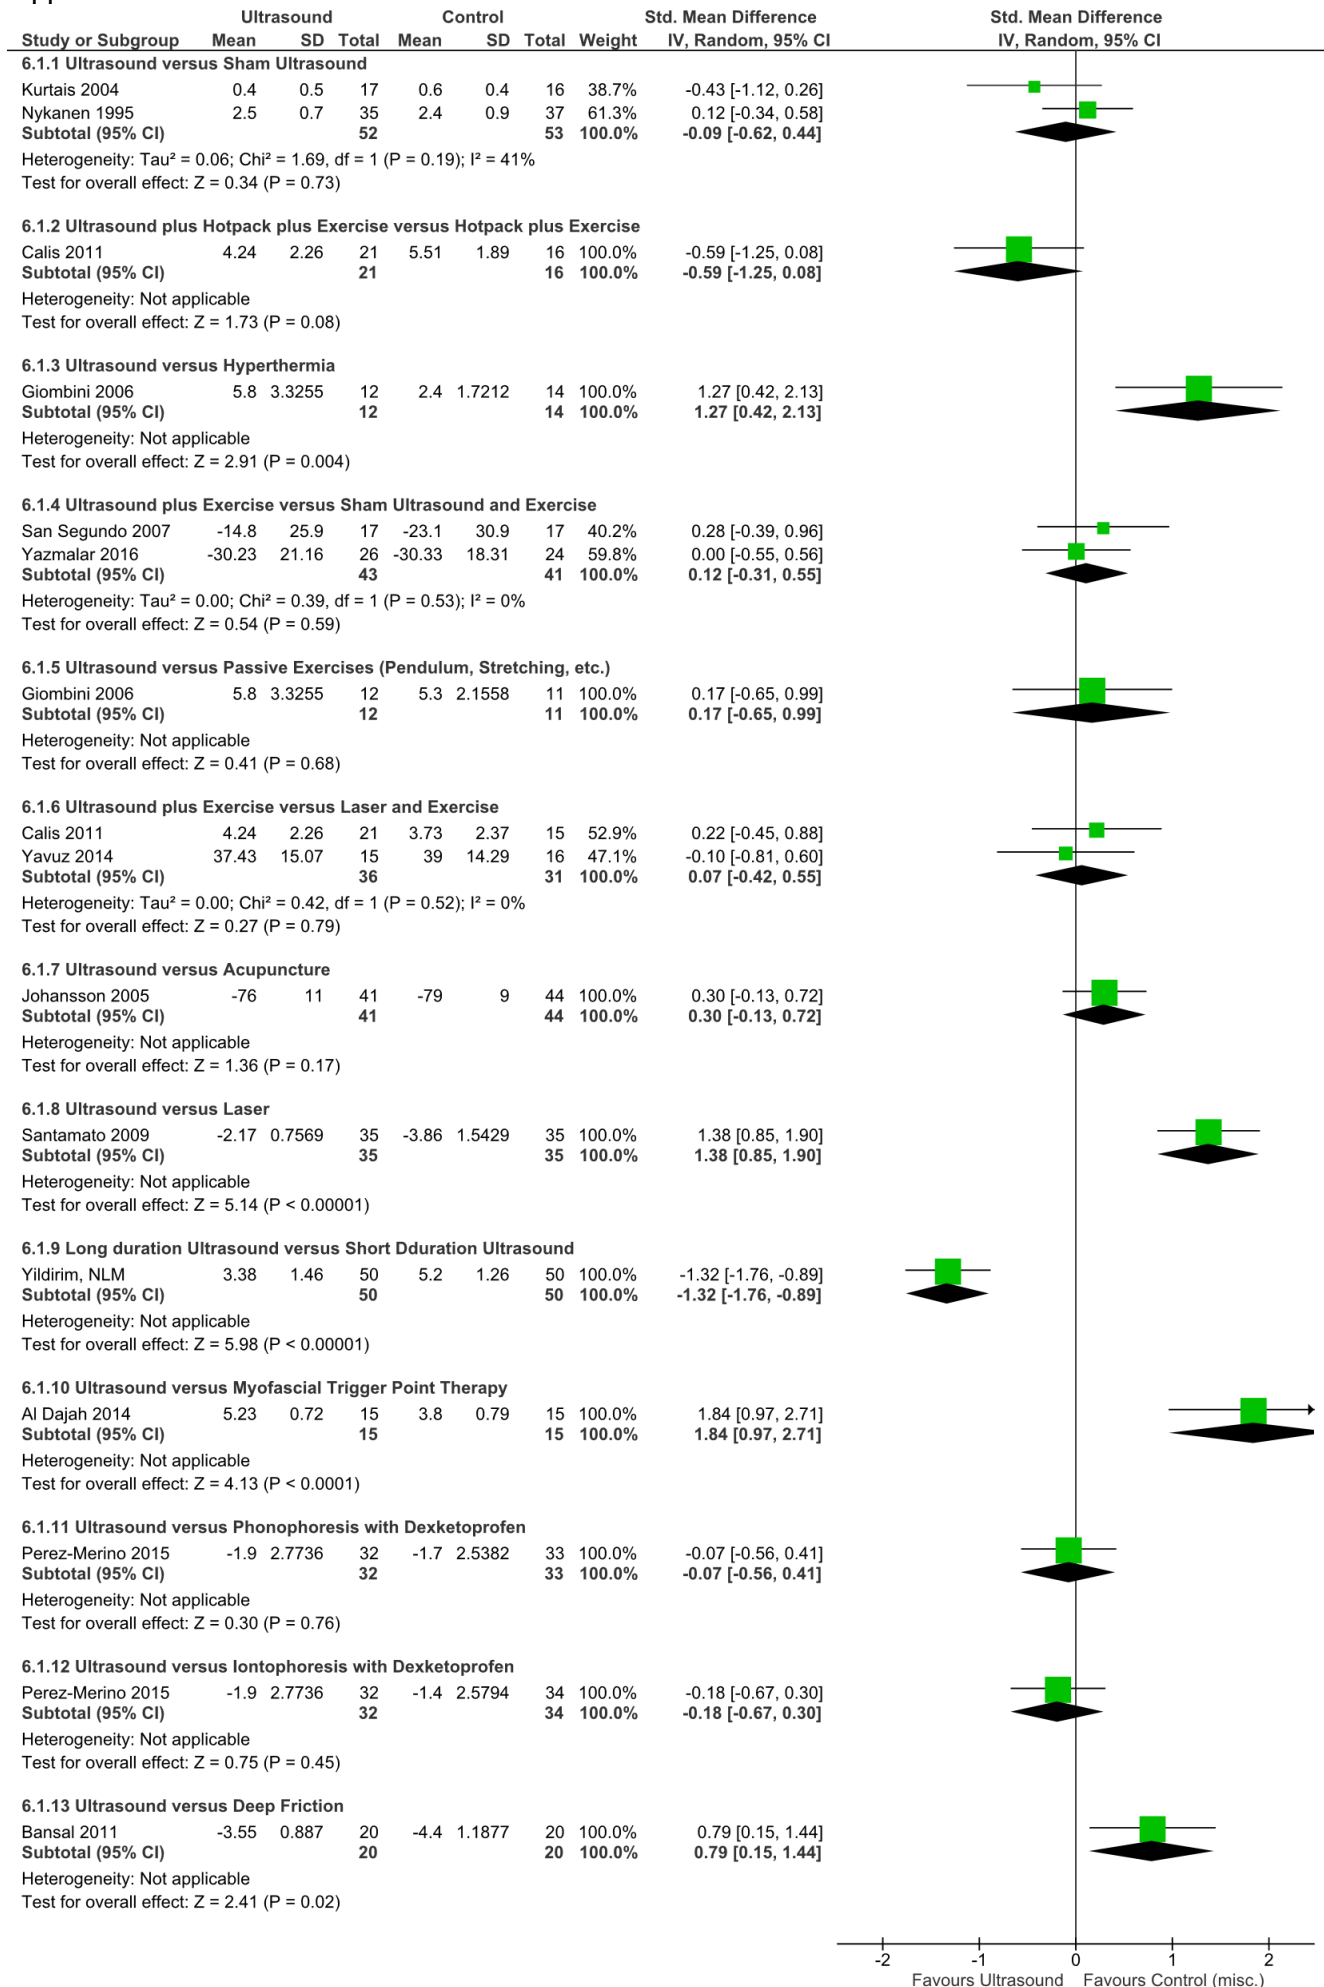

Figure Appendix-4a 12. Ultrasound: Outcome pain at the shortest follow-up

## Appendix 4a Forest Plots Pain

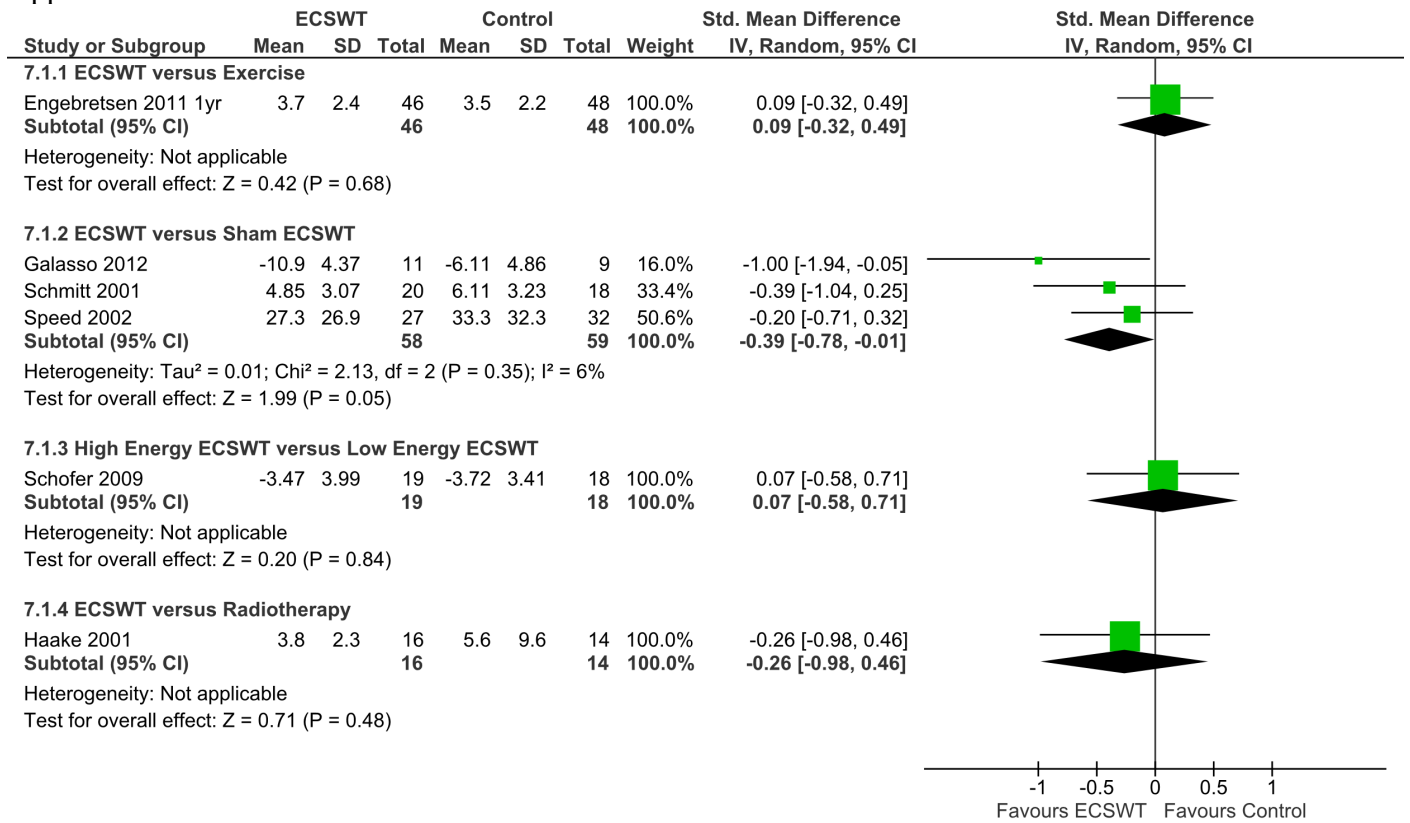

Figure Appendix-4a 13. Extracorporeal shockwave therapy (ECSWT): Outcome pain at the longest follow-up

## Appendix 4a Forest Plots Pain

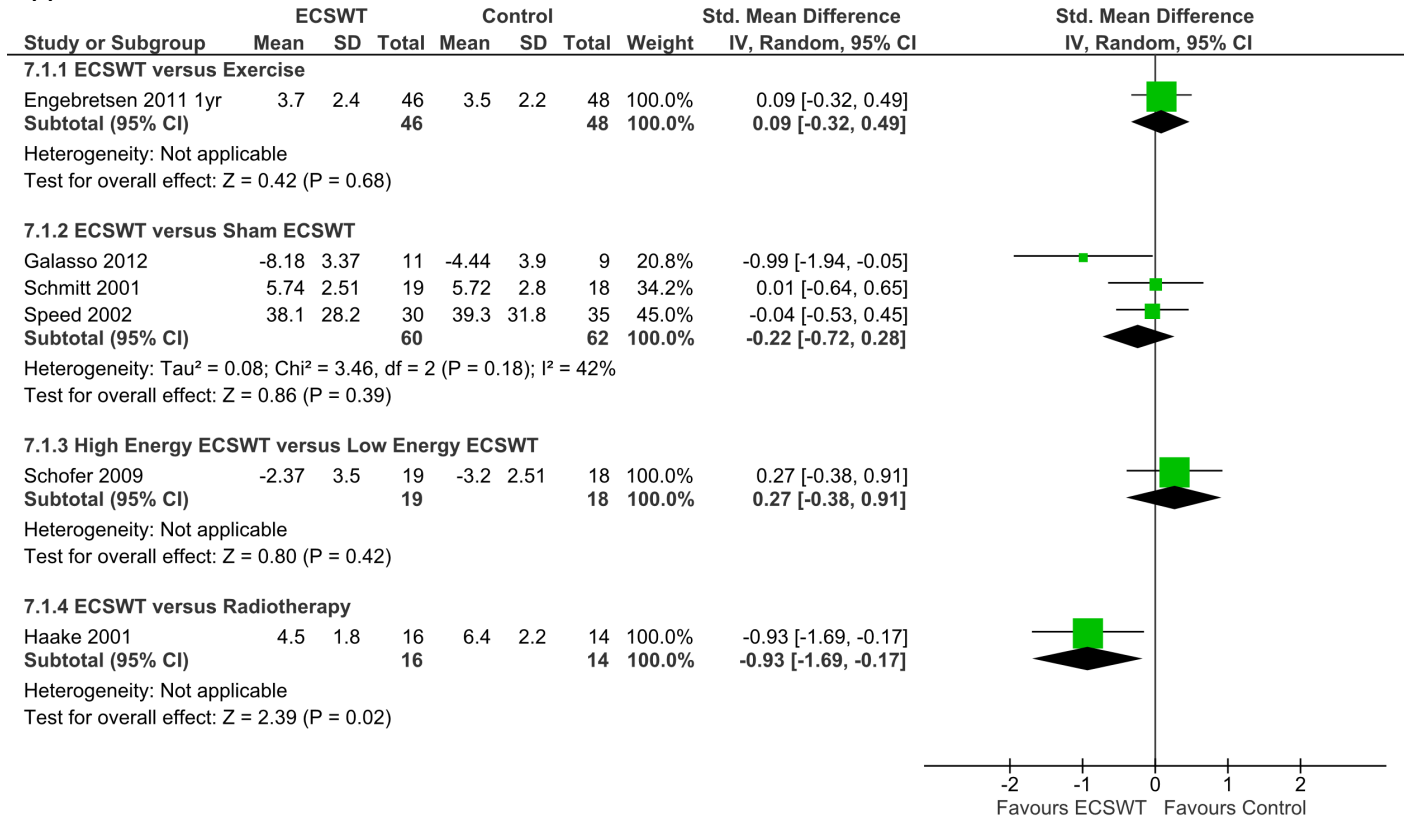

Figure Appendix-4a 14. Extracorporeal shockwave therapy (ECSWT): Outcome pain at the shortest follow-up

## Appendix 4a Forest Plots Pain

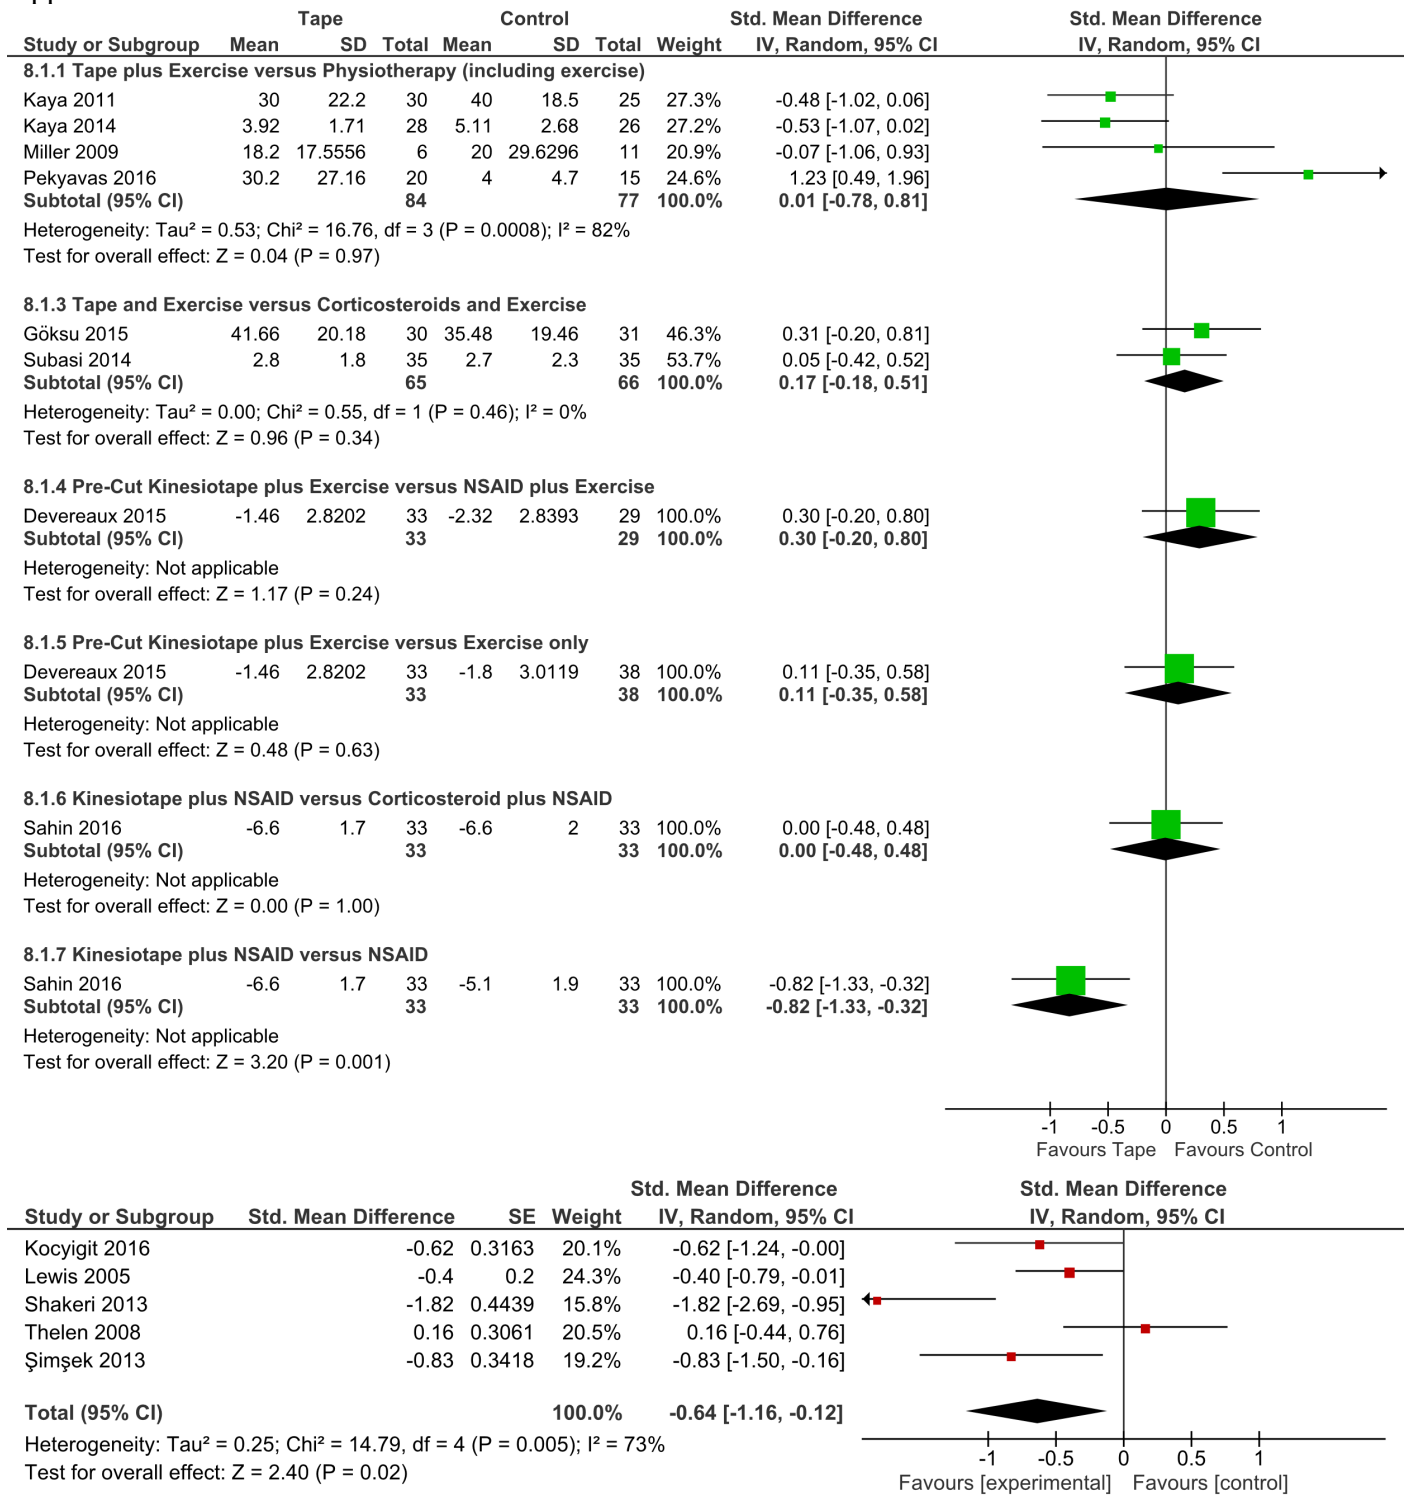

Figure Appendix-4a 15. Tape: Outcome pain at the longest follow-up

## Appendix 4a Forest Plots Pain

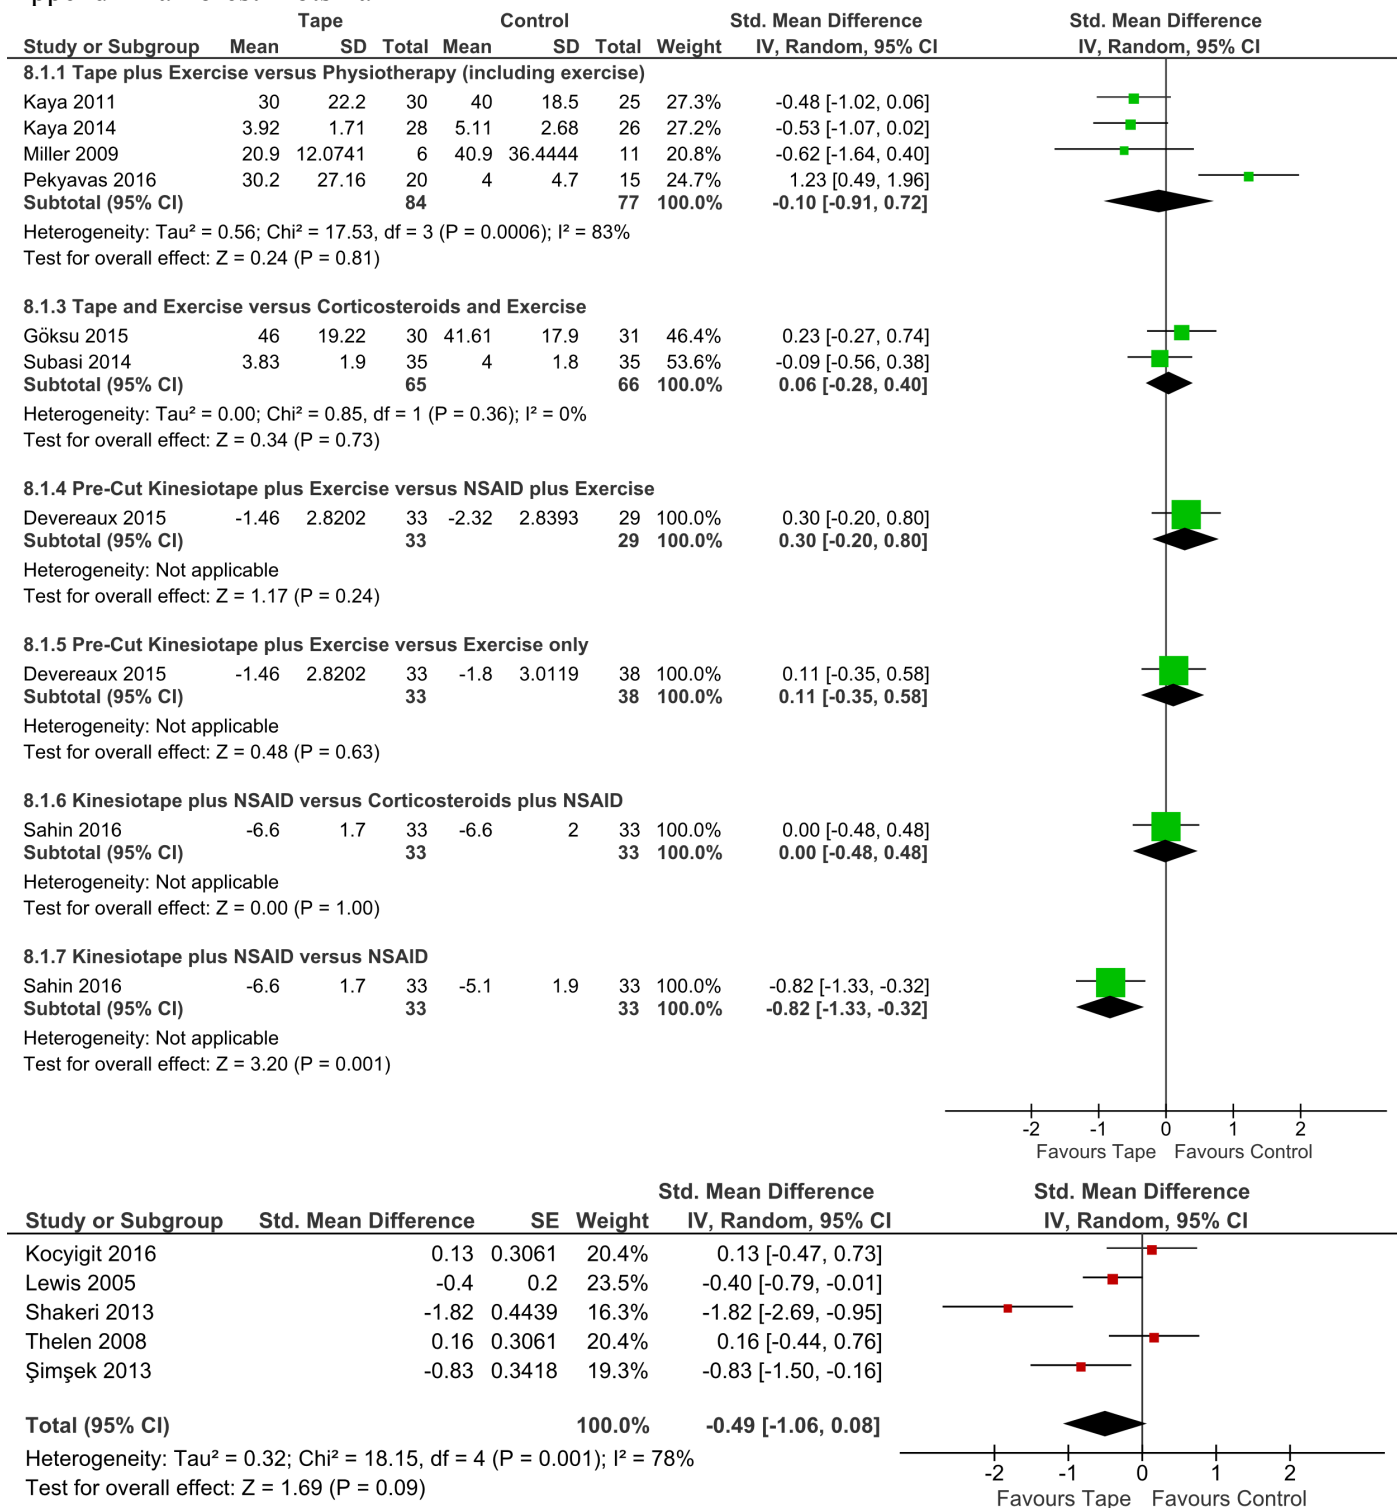

Figure Appendix-4a 16. Tape: Outcome pain at the shortest follow-up



## Appendix 4a Forest Plots Pain

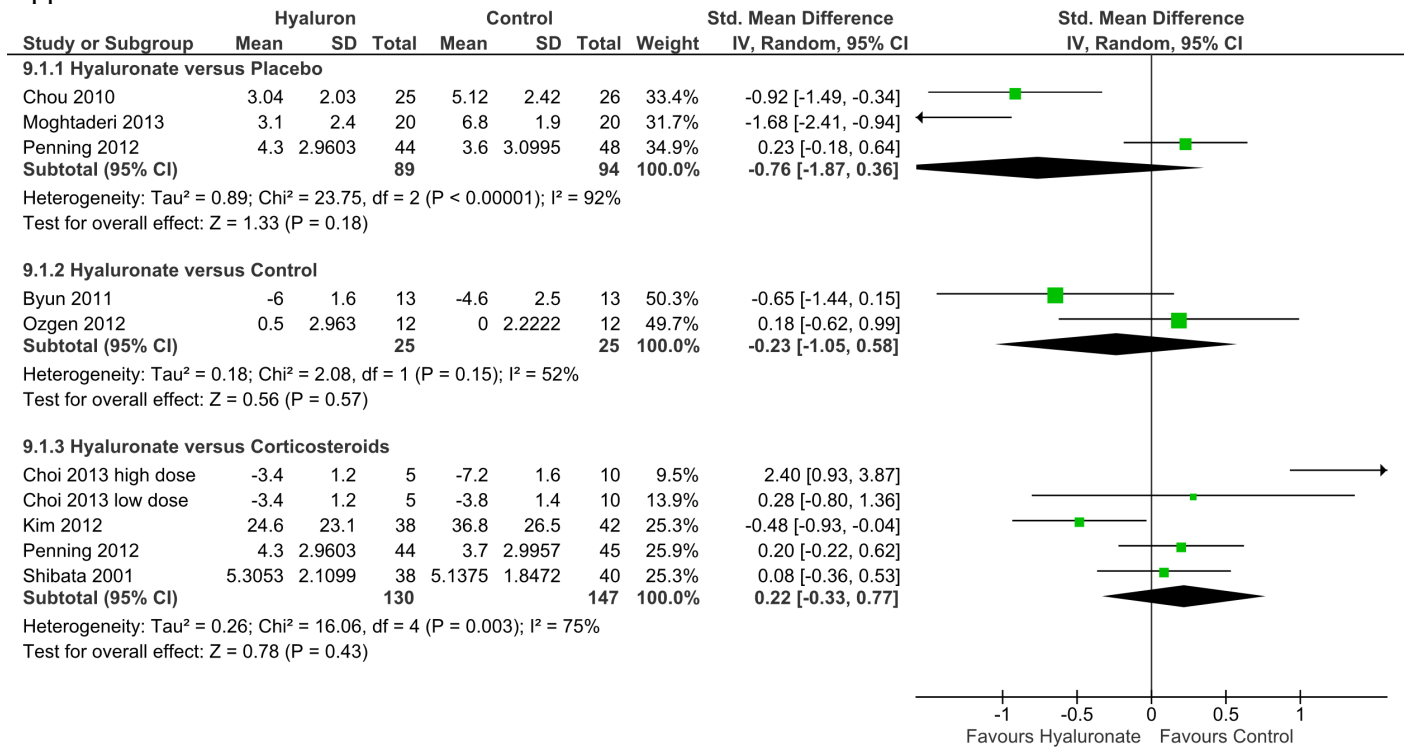

Figure Appendix-4a 17. Hyaluronate: Outcome pain at the longest follow-up

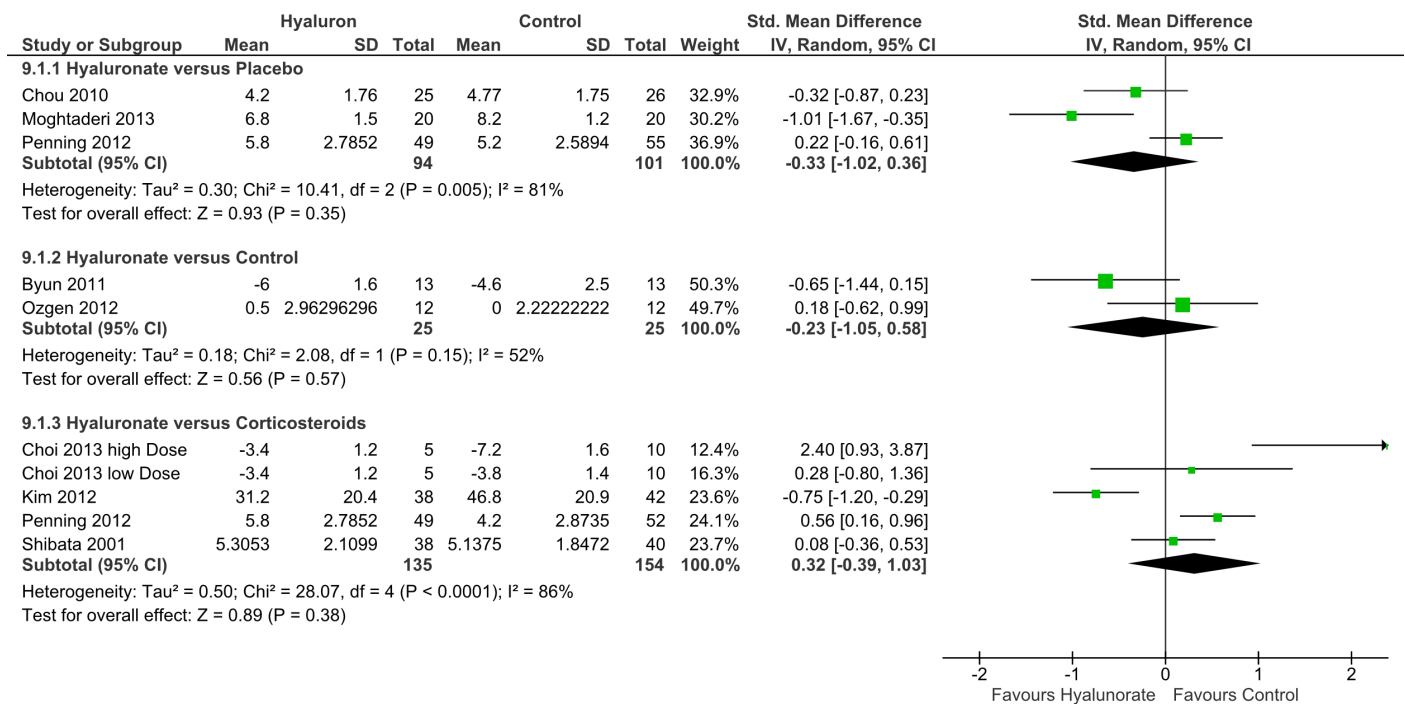

Figure Appendix-4a 18. Hyaluronate: Outcome pain at the shortest follow-up

## Appendix 4a Forest Plots Pain

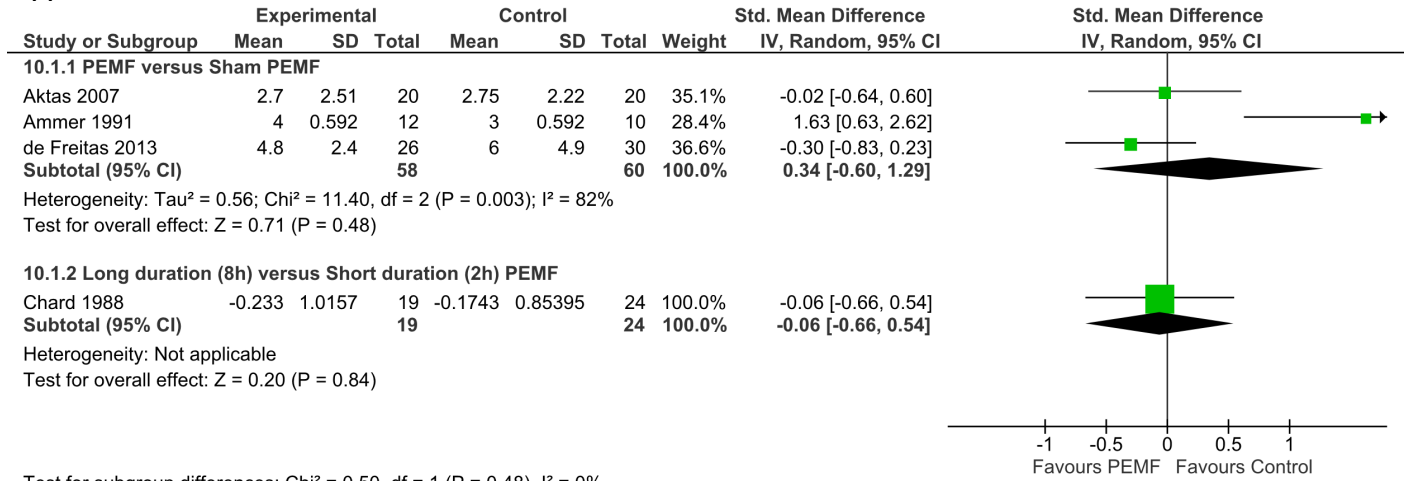

Test for subgroup differences: Chi<sup>2</sup> = 0.50, df = 1 (P = 0.48), I<sup>2</sup> = 0%

Figure Appendix-4a 19. PEMF: Outcome pain at the longest follow-up

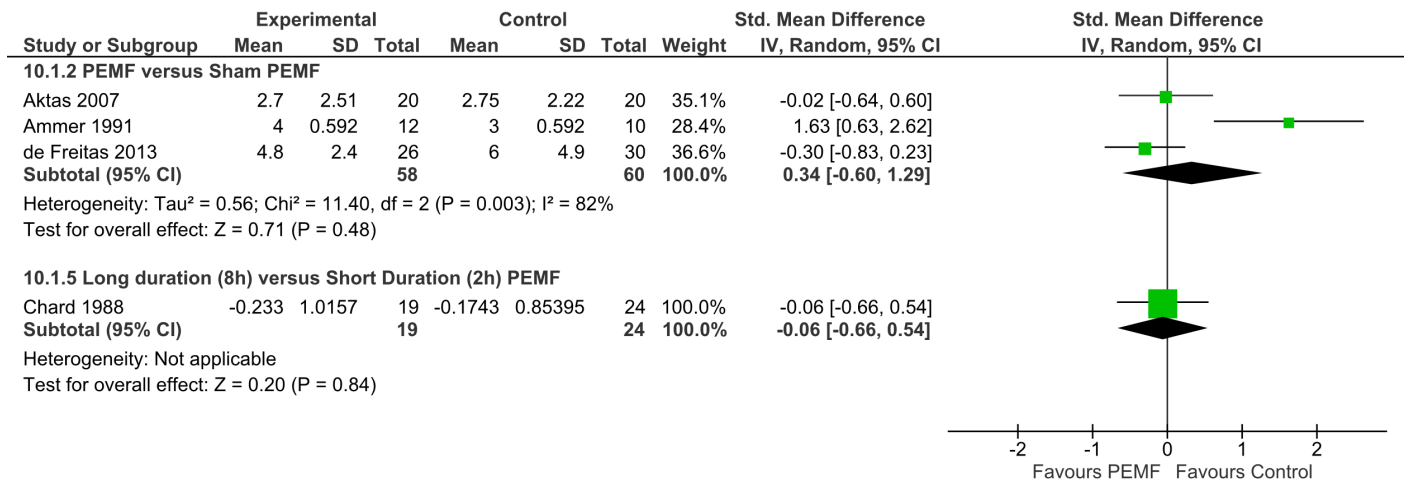

Figure Appendix-4a 20. PEMF: Outcome pain at the shortest follow-up

## Appendix 4a Forest Plots Pain

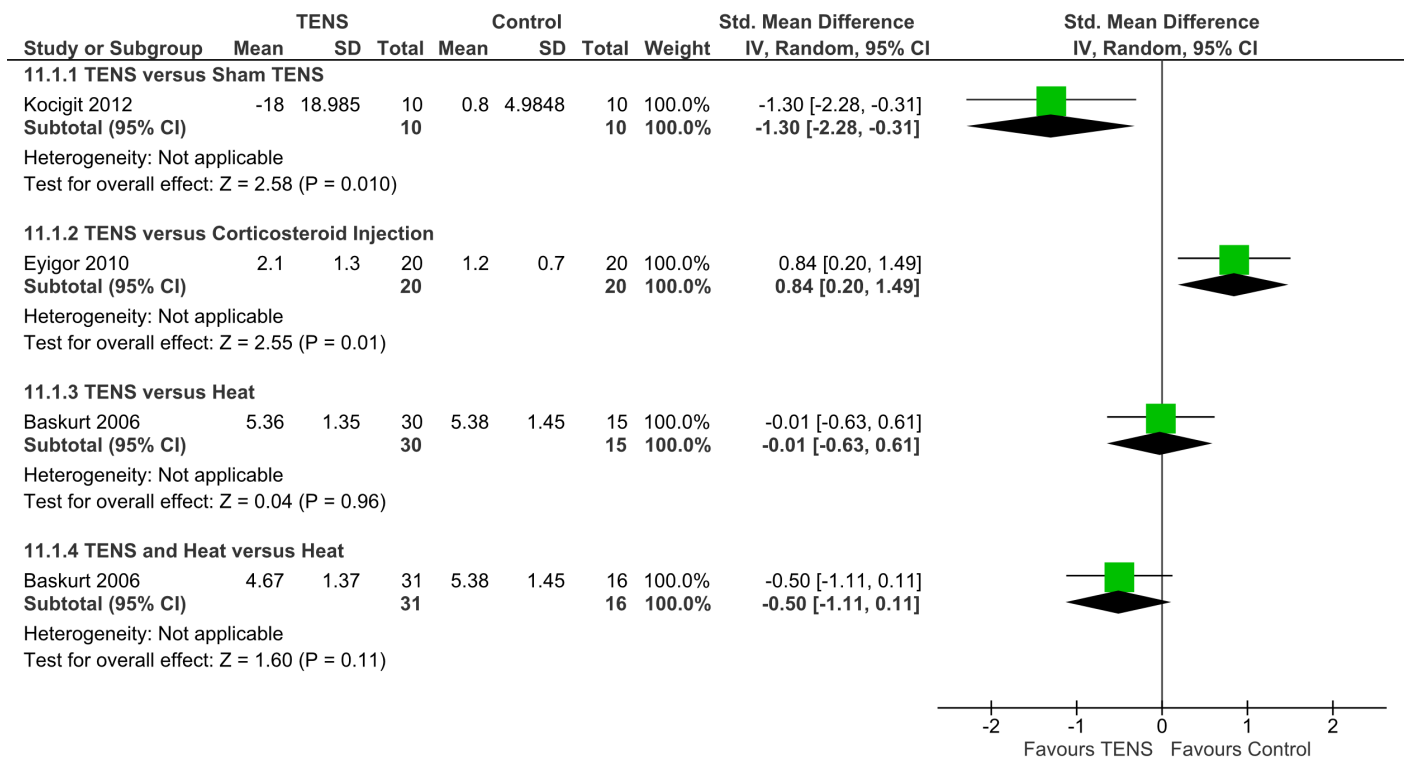

Figure Appendix-4a 21. TENS: Outcome pain at the longest follow-up

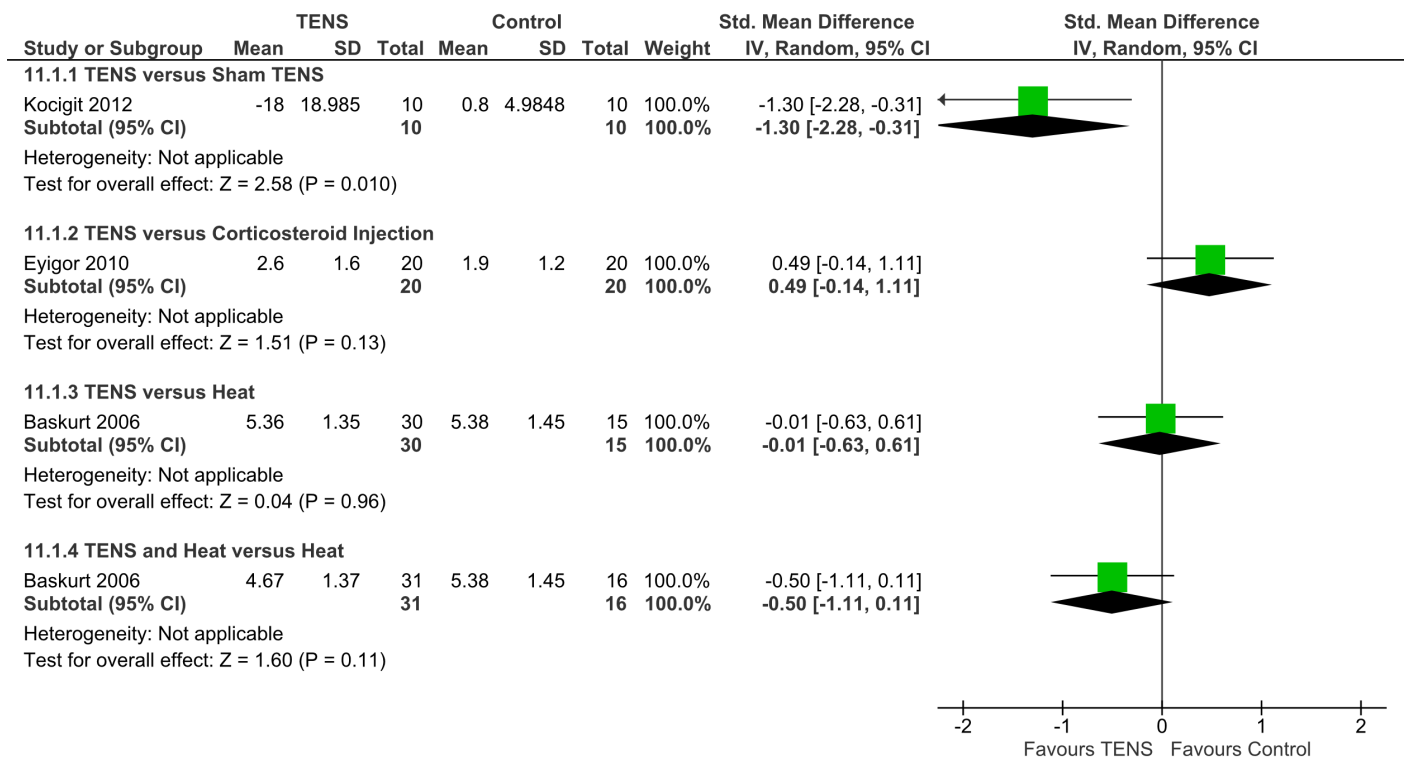

Figure Appendix-4a 22. TENS: Outcome pain at the shortest follow-up

### Appendix 4a Forest Plots Pain

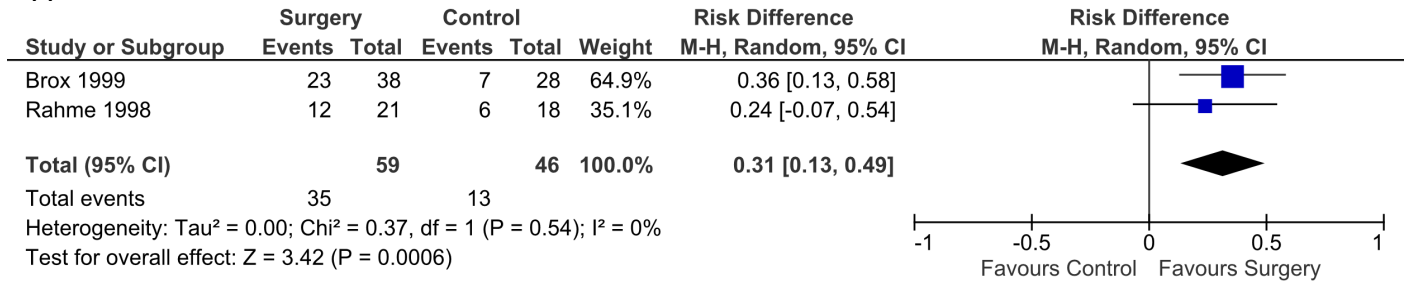

Figure Appendix-4a 23. Surgery: Dichotomous outcome pain at the longest follow-up

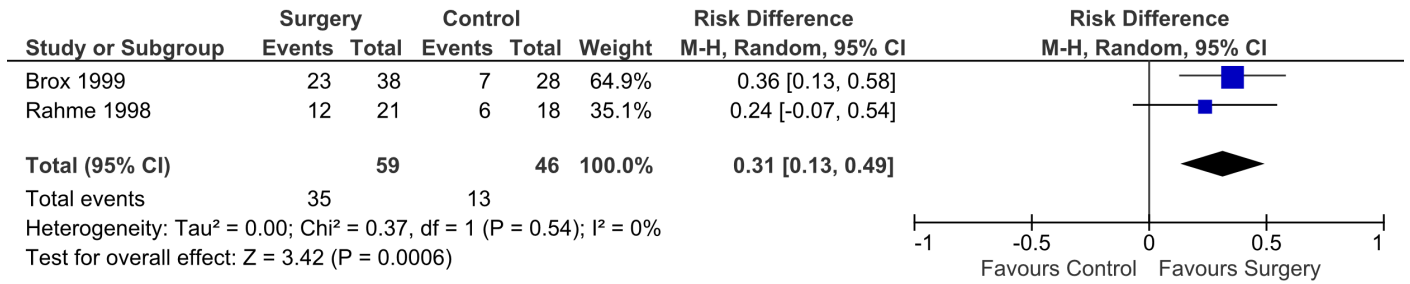

Figure Appendix-4a 24. Surgery: Dichotomous outcome pain at the shortest follow-up

## Appendix 4a Forest Plots Pain

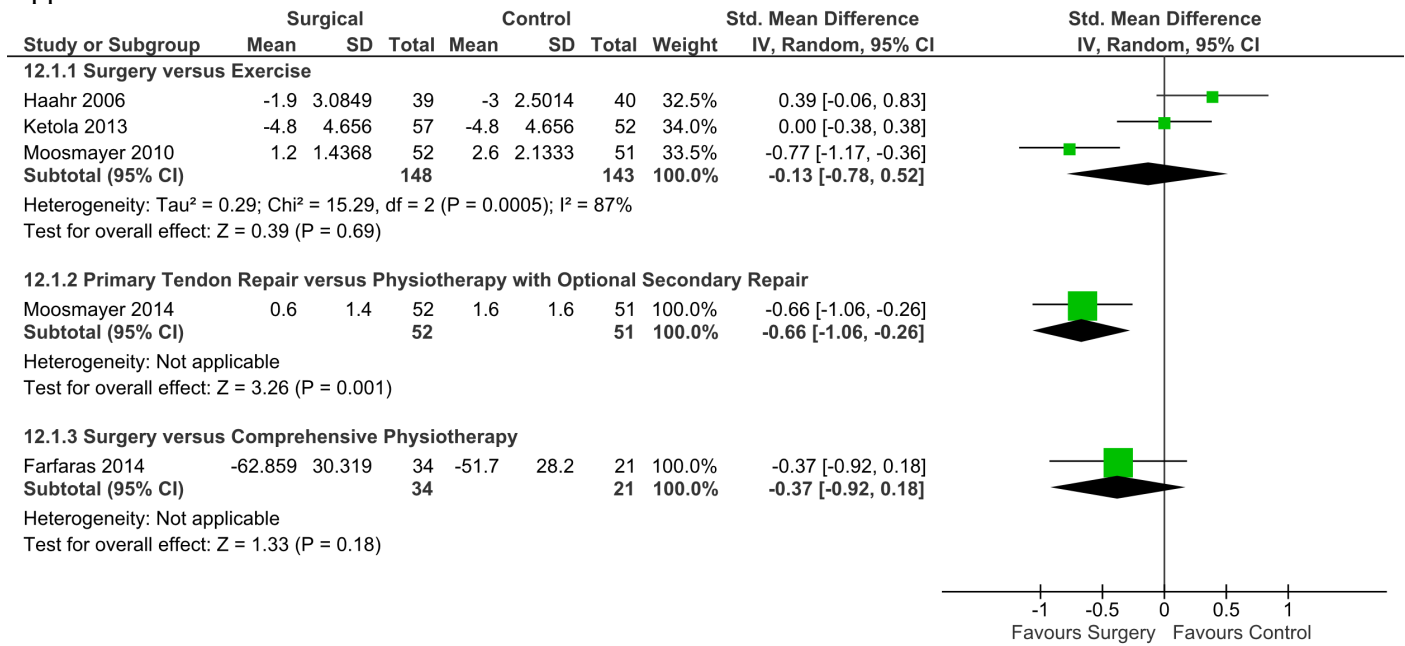

Figure Appendix-4a 25. Surgery: Outcome pain at the longest follow-up

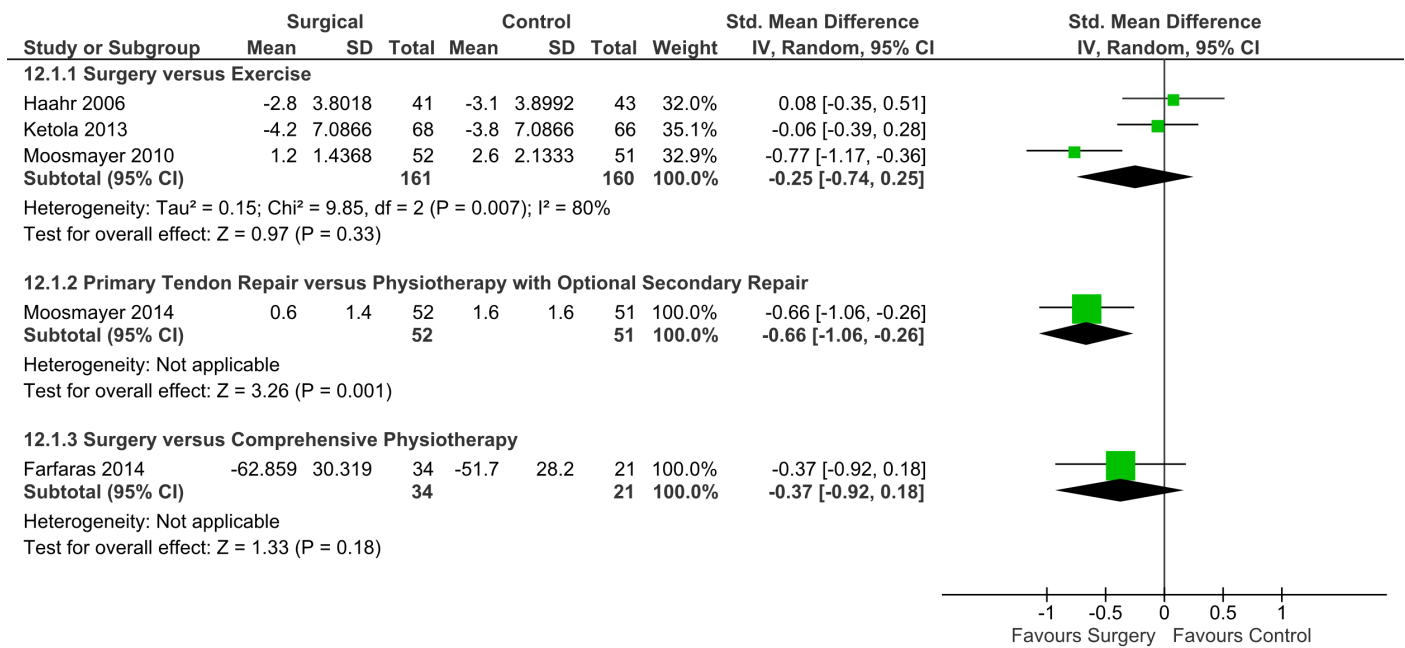

Figure Appendix-4a 26. Surgery: Outcome pain at the shortest follow-up

## Appendix 4a Forest Plots Pain

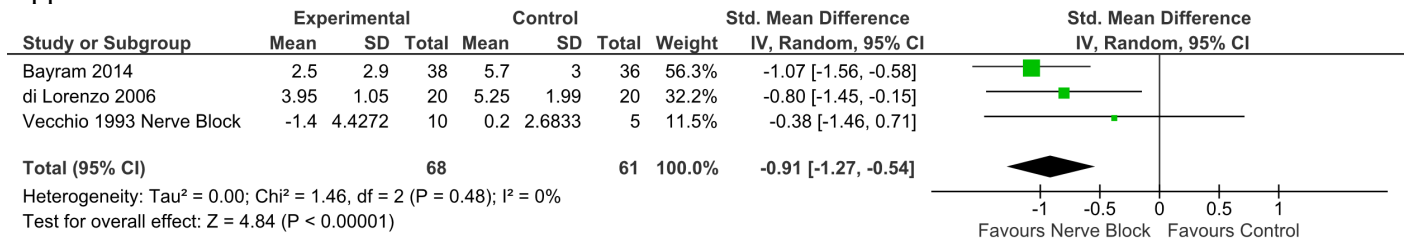

Figure Appendix-4a 27. Nerve block: Outcome pain at the longest follow-up

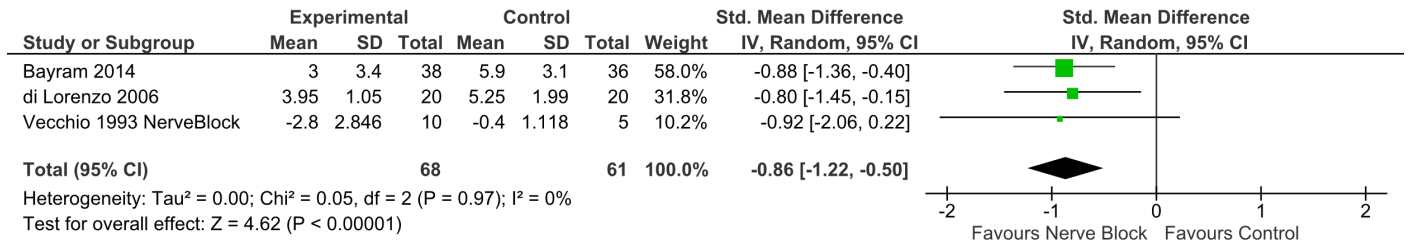

Figure Appendix-4a 28. Nerve block: Outcome pain at the shortest follow-up

## Appendix 4a Forest Plots Pain

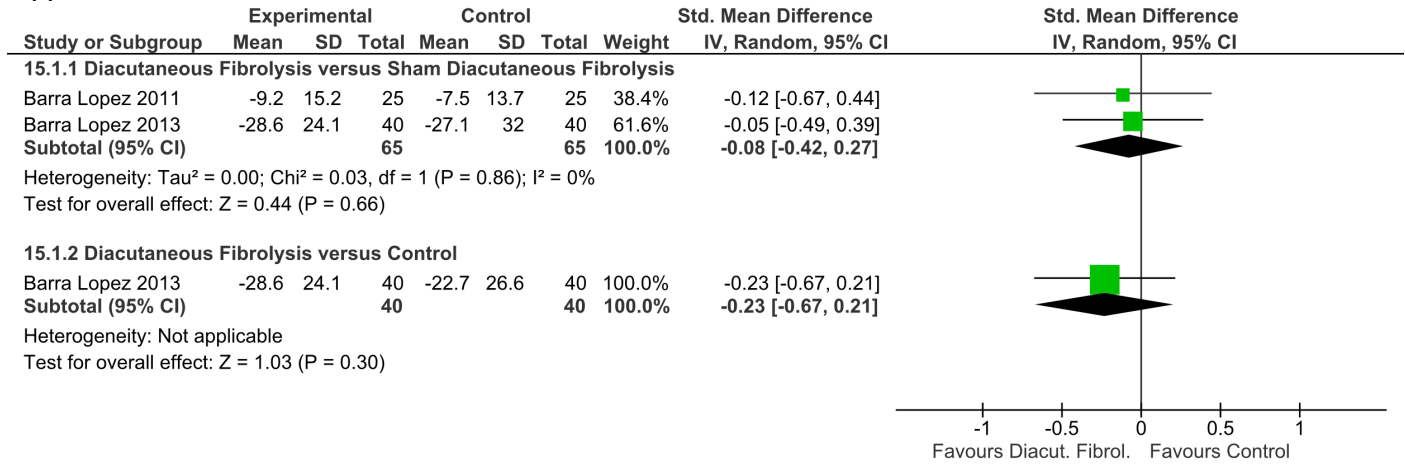

Figure Appendix-4a 29. Diacutaneous Fibrolysis: Outcome pain at the longest follow-up

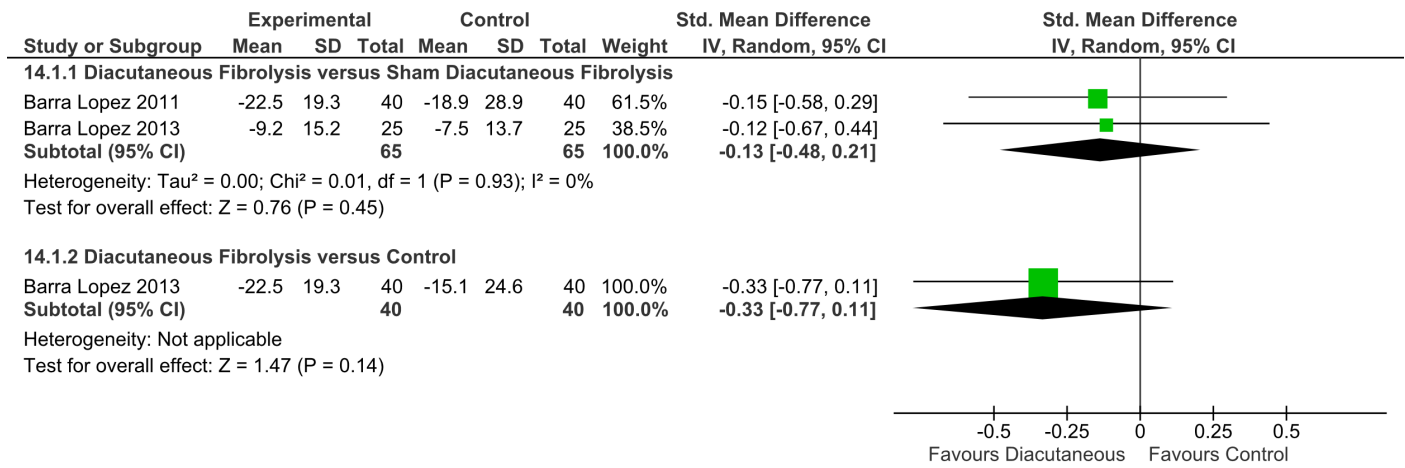

Figure Appendix-4a 30. Diacutaneous Fibrolysis: Outcome pain at the shortest follow-up

## Appendix 4a Forest Plots Pain

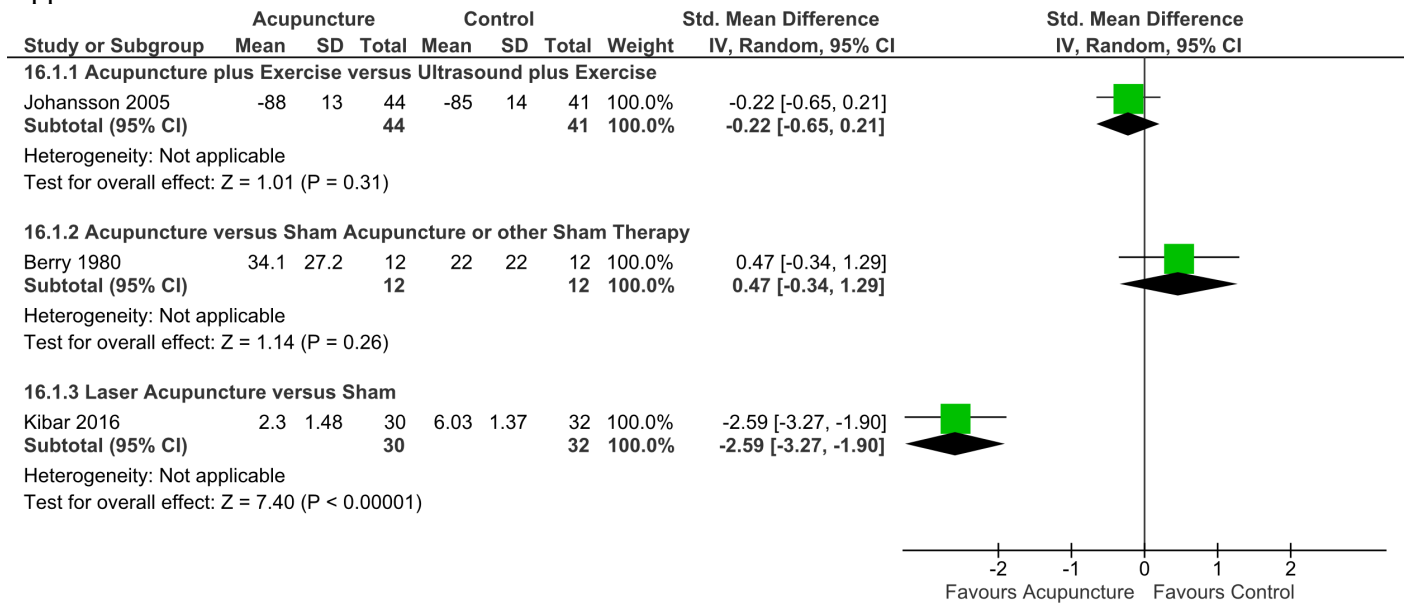

Figure Appendix-4a 31. Acupuncture: Outcome pain at the longest follow-up

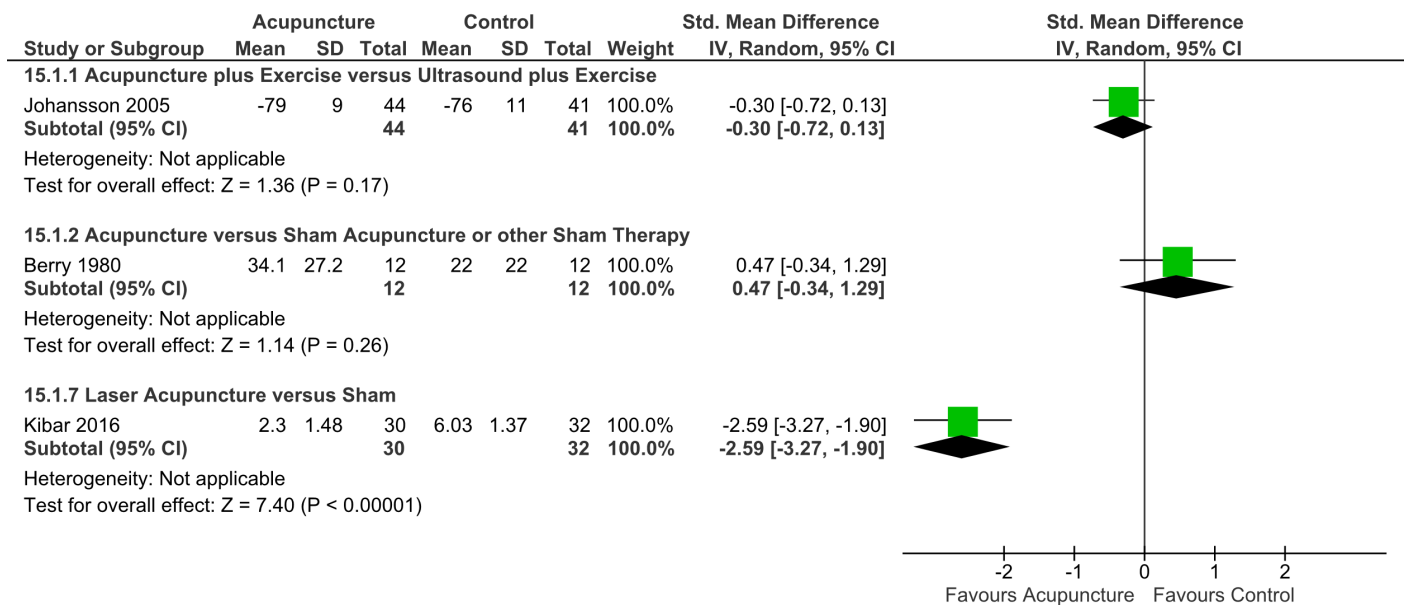

Figure Appendix-4a 32. Acupuncture: Outcome pain at the shortest follow-up



### Appendix 4a Forest Plots Pain

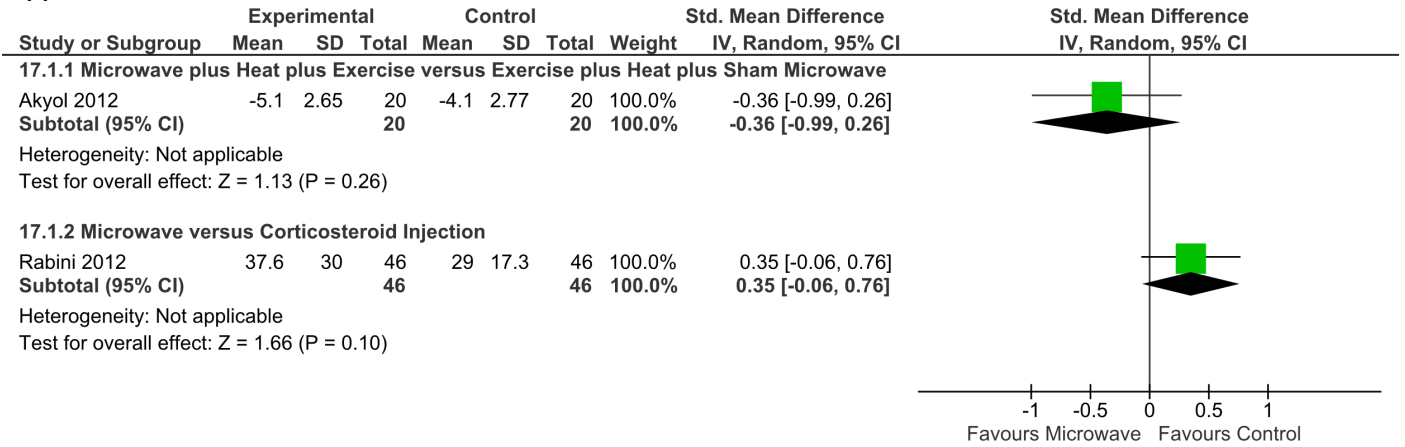

Figure Appendix-4a 33. Microwave: Outcome pain at the longest follow-up

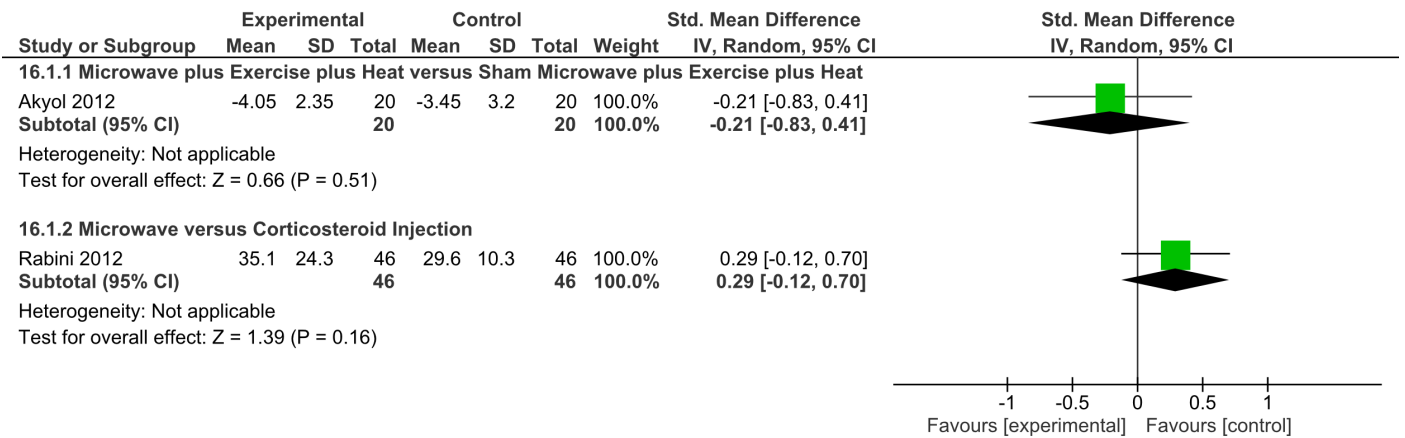

Figure Appendix-4a 34. Microwave: Outcome pain at the shortest follow-up

## Appendix 4a Forest Plots Pain

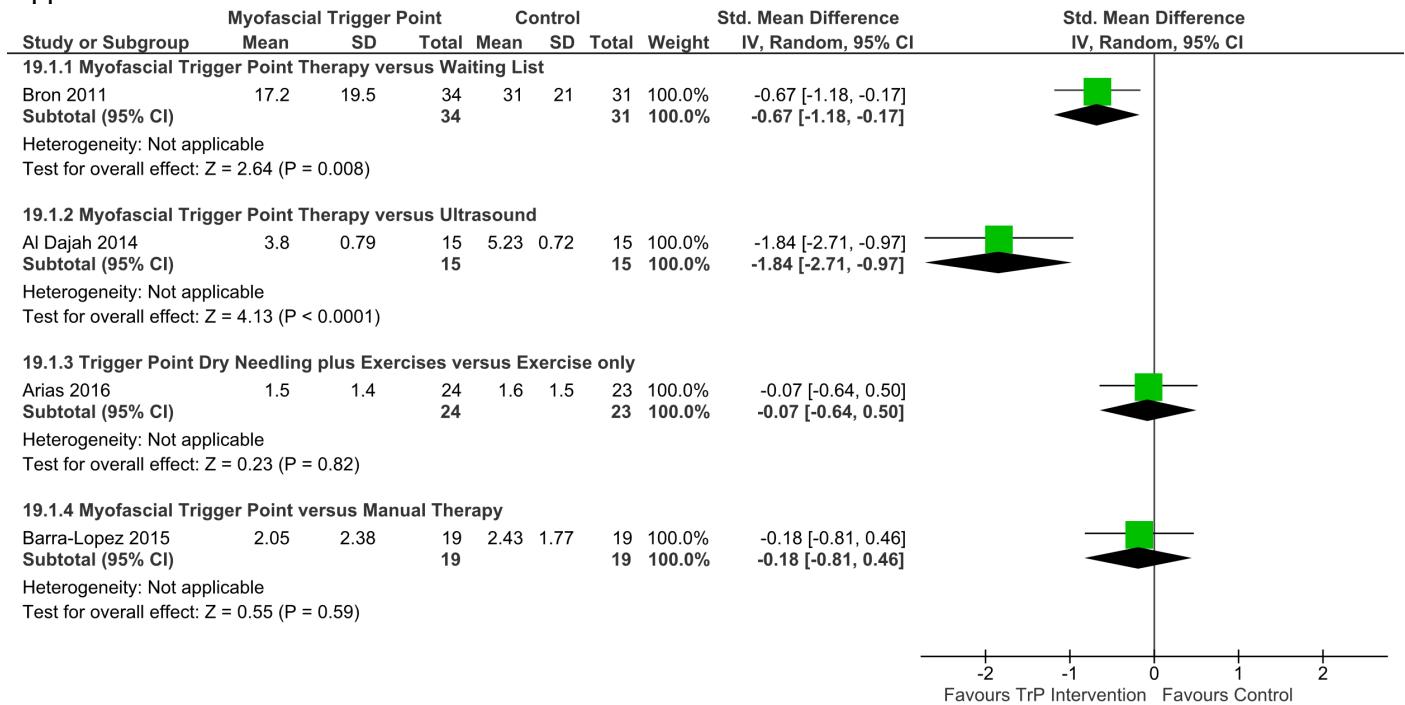

Figure Appendix-4a 35. Myofascial Trigger: Outcome pain at the longest follow-up

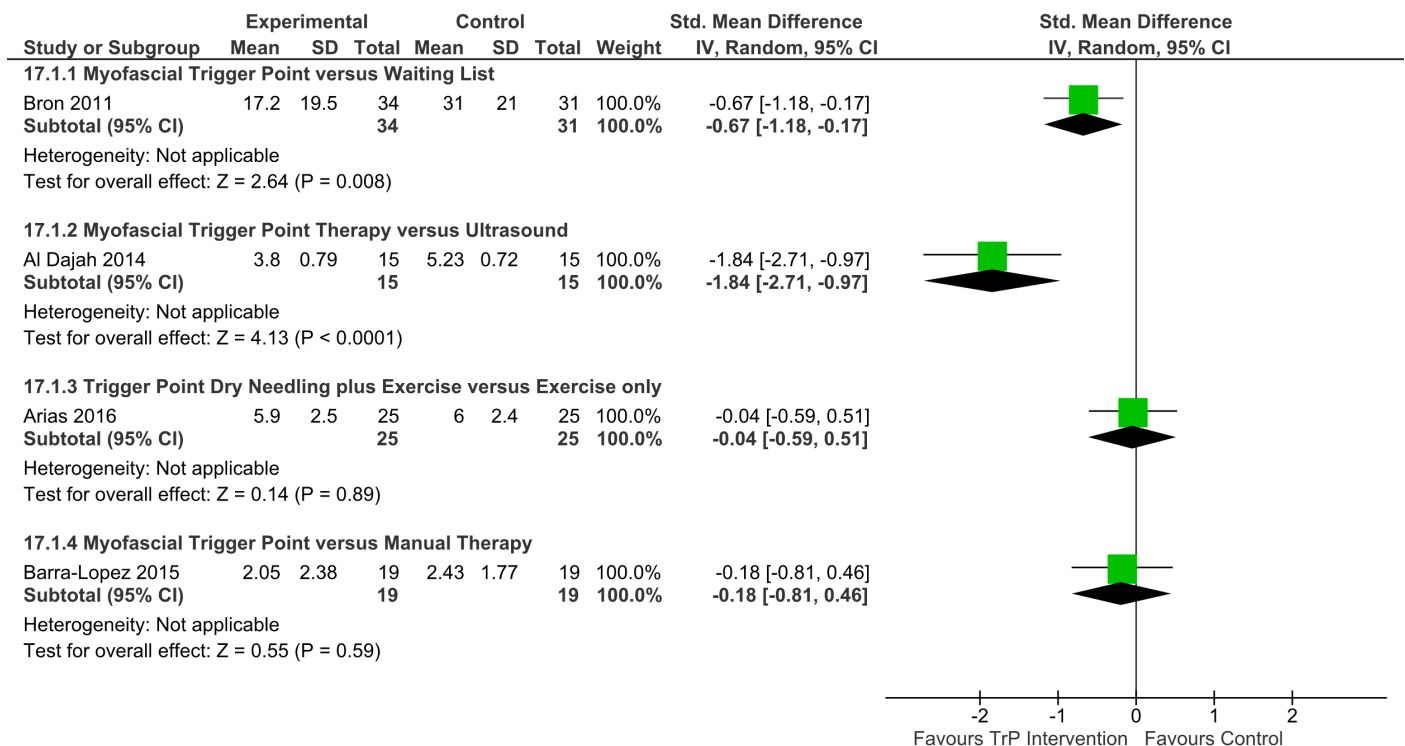

Figure Appendix-4a 36. Myofascial Trigger: Outcome pain at the shortest follow-up

## Appendix 4a Forest Plots Pain

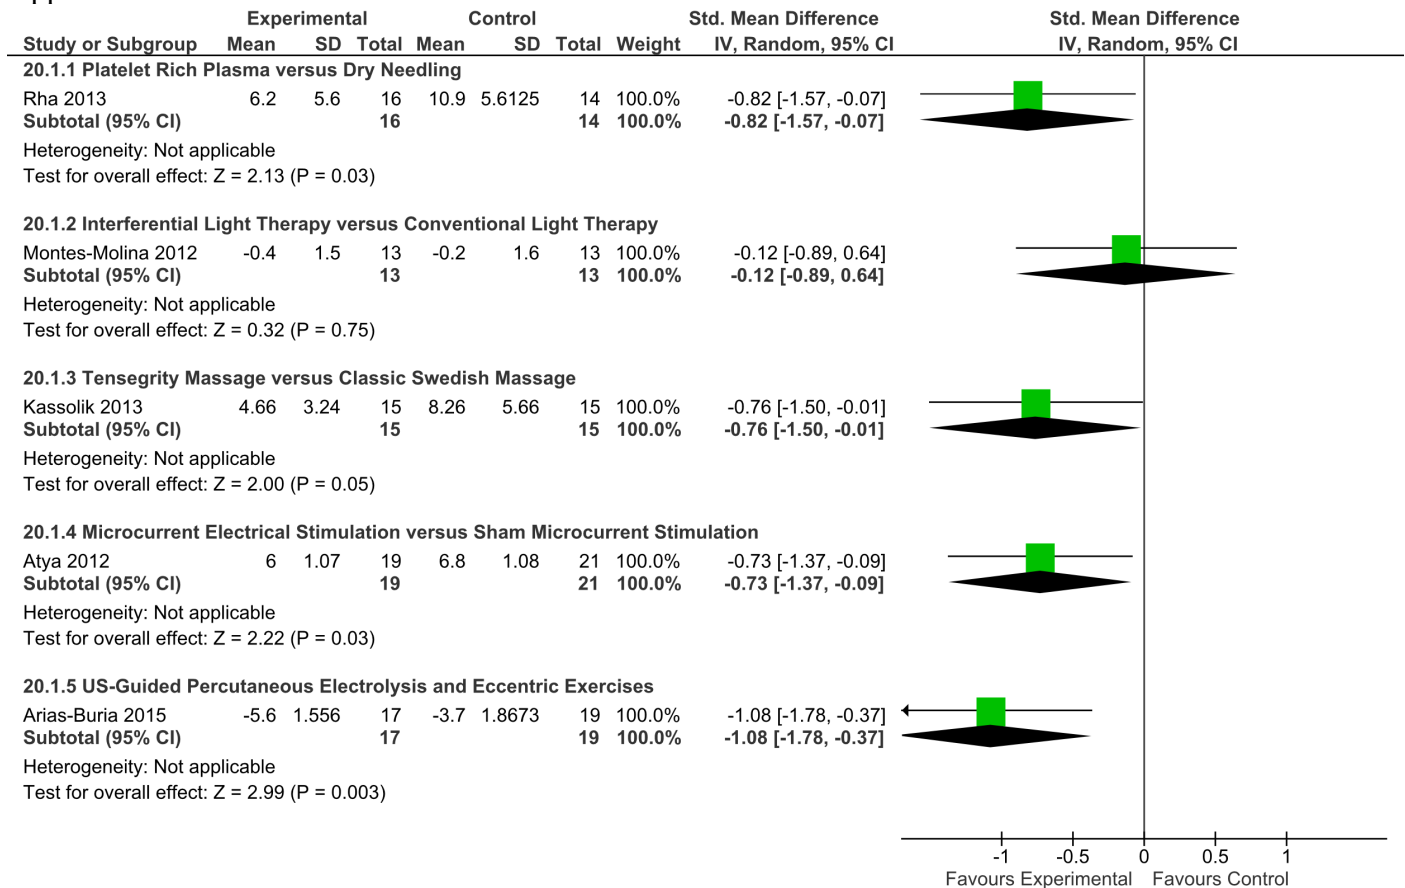

Figure Appendix-4a 37. Miscellaneous interventions: Outcome pain at the longest follow-up

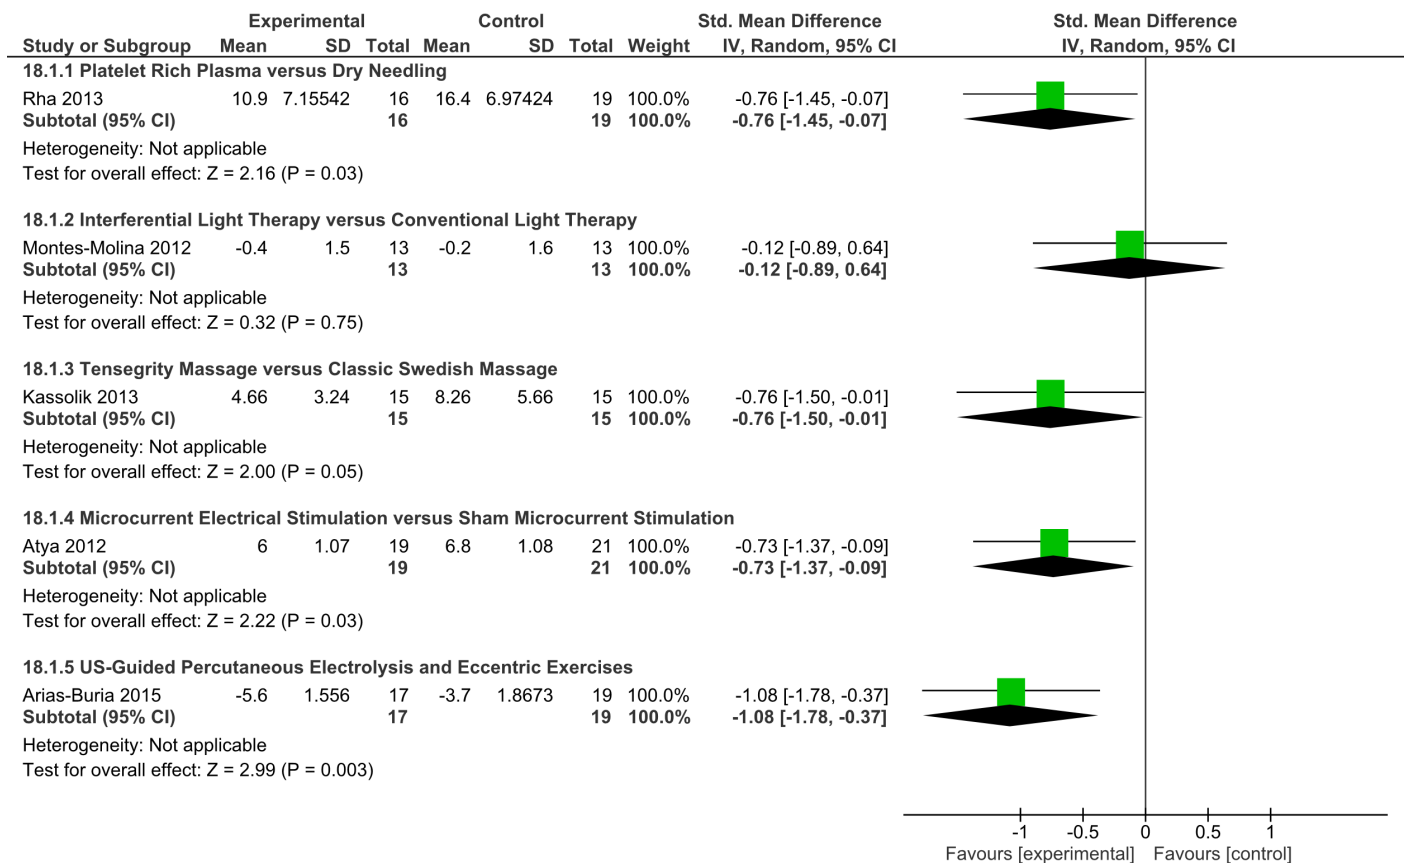

Figure Appendix-4a 38. Miscellaneous interventions: Outcome pain at the longest follow-up
