# Supplementary material
Source: HighWire-hosted journal article supplement (https://bjsm.bmj.com/content/bjsports-2016-096515)
Supplement: inline-supplementary-material-5 [file inline-supplementary-material-5.pdf]

**Appendix 3b** Summary effect sizes, active range of motion, longest follow-up and shortest follow-up

| Comparisons | AROM, longest Follow-up                   |                 |                |   | AROM, shortest Follow-up |                 |                |   |
|-------------|-------------------------------------------|-----------------|----------------|---|--------------------------|-----------------|----------------|---|
|             | SMD (95%CI)                               | N               | I <sup>2</sup> | G | SMD (95%CI)              | N               | I <sup>2</sup> | G |
|             |                                           | Comparisons/T   |                | R |                          | Comparisons/T   |                | R |
|             | Positive values favour left-hand therapy. | rials(Patients) |                | A |                          | rials(Patients) |                | A |
|             |                                           |                 |                | D |                          |                 |                | D |
|             |                                           |                 |                | E |                          |                 |                | E |

**Medication**

|                                                           |                          |             |    |   |                     |             |    |   |
|-----------------------------------------------------------|--------------------------|-------------|----|---|---------------------|-------------|----|---|
| Corticosteroids vs Control                                | 0.96 (-0.17, 2.08)       | 6/4 (203)   | 92 | + | 0.34 (-0.21, 0.90)  | 5/3 (163)   | 64 | + |
| Steroids vs Active Control                                | 0.03 (-0.18, 0.24)       | 14/13 (686) | 44 | + | 0.13 (-0.09, 0.36)  | 14/13 (686) | 51 | + |
| Steroids vs NSAID                                         | 0.08 (-0.38, 0.55)       | 4/4 (142)   | 49 | + | -0.07 (-0.60, 0.46) | 3/3 (102)   | 44 | + |
| Local Steroid vs <b>Systemic Steroid</b>                  | <b>0.72 (0.32, 1.11)</b> | 1 (106)     | NA | + | 0.32 (-0.07, 0.70)  | 1 (104)     | NA | + |
| US-Guided Injections versus "Blind" Injections            | 0.91 (-0.03, 1.84)       | 3/3 (126)   | 84 | + | 0.91 (-0.03, 1.84)  | 3/3 (126)   | 84 | + |
| Corticosteroid plus NSAID versus Kinesiotaping plus NSAID | 0.40 (-0.09, 0.89)       | 1 (66)      | NA | + | 0.40 (-0.09, 0.89)  | 1 (66)      | NA | + |
| Corticosteroid plus NSAID versus NSAID                    | 5.31 (4.26, 6.36)        | 1 (66)      | NA | + | 5.31 (4.26, 6.36)*  | 1 (66)      | NA | + |
| Celecoxib 500 mg vs versus Placebo                        | 2.62 (2.25, 3.00)        | 1 (206)     | NA | + | 2.62 (2.25, 3.00)*  | 1 (206)     | NA | + |
| Naproxen 500 mg vs Placebo                                | 3.10 (2.69, 3.50)        | 1 (208)     | NA | + | 3.10 (2.69, 3.50)*  | 1 (208)     | NA | + |

|                                                        |                          |           |    |   |                      |           |    |   |
|--------------------------------------------------------|--------------------------|-----------|----|---|----------------------|-----------|----|---|
| Topical Glyceryl Trinitrate Patch versus Placebo Patch | 0.56 (-0.01, 1.14)       | 1 (48)    | NA | + | 0.32 (-0.23 to 0.88) | 1 (51)    | NA | + |
| Local Anesthetic versus Corticosteroids                | 0.12 (-0.21 to 0.44)     | 3/3 (146) | 0  | + | -0.38 (-0.84, 0.08)  | 3/3 (146) | 46 | + |
| Local Anesthetic Patch versus Corticosteroids          | 0.12 (-0.39, 0.63)       | 1 (60)    | NA | + | 0.14 (-0.37, 0.65)   | 1 (60)    | NA | + |
| Diclofenac versus Placebo                              | <b>1.08 (0.41, 1.75)</b> | 1 (40)    | NA | + | 1.08 (0.41, 1.75)*   | 1 (40)    | NA | + |

### Exercise

|                                                                  |                          |           |    |   |                           |           |    |   |
|------------------------------------------------------------------|--------------------------|-----------|----|---|---------------------------|-----------|----|---|
| Exercise vs Nothing                                              | 0.08 (-0.61, 0.77)       | 2/2 (75)  | 39 | + | 0.08 (-0.61, 0.77)*       | 2/2 (75)  | 39 | + |
| Exercise vs Passive Physical Therapy                             | 1.00 (0.25, 1.76)        | 4/4 (152) | 76 | + | <b>0.89 (0.02, 1.76)</b>  | 3/3 (173) | 85 | + |
| Exercise vs Surgery                                              | 0.16 (-0.13, 0.45)       | 2/2 (182) | 0  | + | 0.20 (-0.12, 0.52)        | 2/2 (187) | 18 | + |
| Specific vs Non Specific Exercise                                | <b>0.59 (0.08, 1.10)</b> | 1 (62)    | NA | + | <b>0.59 (0.08, 1.10)*</b> | 1 (62)    | NA | + |
| Traditional plus Eccentric Exercises versus Traditional Exercise | 0.09 (-0.59, 0.76)       | 1 (34)    | NA | + | 0.09 (-0.59, 0.76)*       | 1 (34)    | NA | + |
| Supervised versus Home Based Exercises                           | -0.16 (-0.76, 0.43)      | 1 (44)    | NA | + | -0.14 (-0.77, 0.49)       | 1 (39)    | NA | + |
| Physiotherapy plus Proprioceptive Exercises versus Physiotherapy | 0.00 (-0.50, 0.50)       | 1 (61)    | NA | + | 0.00 (-0.50, 0.50)*       | 1 (61)    | NA | + |
| Scapular Oriented Motor Control vs Exercise plus Manual Therapy  | 0.22 (-0.40, 0.84)       | 1 (40)    | NA | + | 0.22 (-0.40, 0.84)*       | 1 (40)    | NA | + |
| Home Based vs Occupational Therapy                               | 0.10 (-0.55, 0.74)       | 1 (38)    | NA | + | 0.10 (-0.55, 0.74)*       | 1 (38)    | NA | + |
| Motor Imagery plus Exercise versus Exercise                      | 0.33 (-0.65, 1.32)       | 1 (16)    | NA | + | 0.33 (-0.65, 1.32)*       | 1 (16)    | NA | + |
| Clinic based Work Hardening vs Work-Place Based                  | -0.22 (-0.63, 0.18)      | 1 (94)    | NA | + | -0.22 (-0.63, 0.18)*      | 1 (94)    | NA | + |

## Manual therapy

|                                                                                                    |                             |           |    |   |                              |           |    |   |
|----------------------------------------------------------------------------------------------------|-----------------------------|-----------|----|---|------------------------------|-----------|----|---|
| Manual therapy vs Placebo                                                                          | 0.03 (-0.35, 0.41)          | 3/3 (107) | 0  | + | 0.06 (-0.29, 0.40)           | 3/3 (127) | 0  | + |
| Manual Therapy plus Exercise vs Exercise alone                                                     | 0.16 (-0.41, 0.73)          | 6/6 (160) | 64 | + | 0.16 (-0.41, 0.73)*          | 6/6 (160) | 64 | + |
| Manual Therapy versus Supervised Exercises                                                         | -0.11 (-1.02, 0.80)         | 1 (19)    | NA | + | 0.22 (-0.41, 0.84)           | 1 (40)    | NA | + |
| Manual Therapy plus Exercise versus Naturopathic Care                                              | <b>-1.28 (-1.75, -0.81)</b> | 1 (85)    | NA | + | <b>-1.28 (-1.75, -0.81)*</b> | 1 (85)    | NA | + |
| Immediate Effects Manual Therapy versus Placebo                                                    | 0.16 (-0.27, 0.59)          | 1 (84)    | NA | + | 0.16 (-0.27, 0.59)*          | 1 (84)    | NA | + |
| Neck or Thoracic Manual Therapy versus Shoulder Treatment Including Manual Therapy of the Shoulder | -0.64 (-1.60, 0.32)         | 1 (18)    | NA | + | -0.64 (-1.60, 0.32)          | 1 (18)    | NA | + |
| Manual Therapy with Movement plus Kinesiotaping versus Exercise                                    | <b>6.23 (3.90, 8.55)</b>    | 1 (20)    | NA | + | <b>6.23 (3.90, 8.55)*</b>    | 1 (20)    | NA | + |
| Manual Therapy versus Myofascial Trigger Point Therapy                                             | -0.29 (-0.93, 0.35)         | 1 (38)    | NA | + | -0.29 (-0.93, 0.35)          | 1 (38)    | NA | + |

## Laser

|                                                                                                               |                          |           |    |   |                           |           |    |   |
|---------------------------------------------------------------------------------------------------------------|--------------------------|-----------|----|---|---------------------------|-----------|----|---|
| Laser and Exercise vs Exercise and Sham Laser                                                                 | 0.56 (-0.27, 1.39)       | 5/5 (273) | 91 | + | 0.56 (-0.27, 1.39)*       | 5/5 (273) | 91 | + |
| Laser vs Sham Laser                                                                                           | 0.41 (-0.26, 1.09)       | 1 (35)    | NA | + | 0.41 (-0.26, 1.09)*       | 1 (35)    | NA | + |
| Laser and Exercise vs Ultrasound and Exercise                                                                 | -0.02 (-0.60, 0.65)      | 1 (36)    | NA | + | -0.02 (-0.68, 0.65)*      | 1 (36)    | NA | + |
| Laser plus Manual Therapy plus Kinesiotape plus Exercise versus Manual Therapy plus Kinesiotape plus Exercise | <b>0.73 (0.04, 1.42)</b> | 1 (35)    | NA | + | <b>0.73 (0.04, 1.42)*</b> | 1 (35)    | NA | + |

---

**Ultrasound**

|                                                              |                            |        |    |   |                             |        |    |   |
|--------------------------------------------------------------|----------------------------|--------|----|---|-----------------------------|--------|----|---|
| Ultrasound vs Sham Ultrasound                                | -0.16 (-0.85, 0.52)        | 1 (33) | NA | + | -0.16 (-0.85, 0.52)*        | 1 (33) | NA | + |
| Ultrasound plus Exercise versus Exercise                     | 0.71 (0.04, 1.38)          | 1 (37) | NA | + | 0.71 (0.04, 1.38)*          | 1 (37) | NA | + |
| Ultrasound plus Exercise versus Sham Ultrasound and Exercise | <b>-0.33 (-1.00, 0.33)</b> | 1 (36) | NA | + | <b>-0.33 (-1.00, 0.33)*</b> | 1 (36) | NA | + |
| Ultrasound plus Exercise versus Laser plus Exercise          | 0.02 (-0.65, 0.68)         | 1 (36) | NA | + | 0.02 (-0.65, 0.68)*         | 1 (36) | NA | + |
| Ultrasound versus Deep Friction                              | -0.73 (-1.37, -0.09)       | 1 (40) | NA | + | -0.73 (-1.37, -0.09)*       | 1 (40) | NA | + |
| Ultrasound versus Myofascial Trigger Point Therapy           | 2.24 (1.30, 3.18)          | 1 (30) | NA | + | 2.24 (1.30, 3.18)*          | 1 (30) | NA | + |

---

**ESWT**

|                       |                          |               |    |   |                          |               |    |   |
|-----------------------|--------------------------|---------------|----|---|--------------------------|---------------|----|---|
| ESWT versus Sham ESWT | <b>1.25 (0.27, 2.23)</b> | <b>1 (20)</b> | NA | + | <b>1.11 (0.15, 2.07)</b> | <b>1 (20)</b> | NA | + |
|-----------------------|--------------------------|---------------|----|---|--------------------------|---------------|----|---|

---

**Tape**

|                                                          |                          |               |    |   |                          |               |    |   |
|----------------------------------------------------------|--------------------------|---------------|----|---|--------------------------|---------------|----|---|
| Tape plus Exercise versus Physiotherapy (incl. Exercise) | 0.01 (-0.54, 0.57)       | 2/2 (52)      | 0  | + | 0.02 (-0.54 to 0.54)     | 2/2 (52)      | 0  | + |
| Taping versus Sham Taping                                | 0.36 (-0.29 to 1.02)     | 5/5 (211)     | 73 | + | 0.28 (-0.27, 0.82)       | 5/5 (211)     | 74 | + |
| Tape plus Exercise versus Corticosteroids plus Exercise  | -0.25 (-0.84, 0.34)      | 2/2 (131)     | 65 | + | -0.29 (-0.92, 0.06)      | 2/2 (131)     | 72 | + |
| Kinesiotape plus NSAID versus Corticosteroid plus NSAID  | -0.43 (-0.92 to 0.06)    | 1 (66)        | NA | + | -0.43 (-0.92 to 0.06)    | 1 (66)        | NA | + |
| Kinesiotape plus NSAID versus NSAID                      | <b>4.82 (3.84, 5.80)</b> | <b>1 (66)</b> | NA | + | <b>4.82 (3.84, 5.80)</b> | <b>1 (66)</b> | NA | + |

---

**Hyaluronate**

---

|                                    |                     |           |    |   |                    |           |    |   |
|------------------------------------|---------------------|-----------|----|---|--------------------|-----------|----|---|
| Hyaluronate versus Control         | 0.34 (0.43, 1.12)   | 1 (26)    | NA | + | 0.18 (-0.38, 0.73) | 2/2 (50)  | 0  | + |
| Hyaluronate versus Corticosteroids | -0.07 (-0.60, 0.45) | 4/3 (188) | 59 | + | 0.14 (-0.25, 0.54) | 4/3 (188) | 33 | + |

### PEMF

|                       |                    |          |    |   |                    |          |    |   |
|-----------------------|--------------------|----------|----|---|--------------------|----------|----|---|
| PEMF versus Sham PEMF | 1.33 (-3.60, 6.26) | 2/2 (96) | 62 | + | 0.19 (-0.43, 0.81) | 2/2 (96) | 56 | + |
|-----------------------|--------------------|----------|----|---|--------------------|----------|----|---|

### TENS

|                                                     |                             |        |    |   |                             |        |    |   |
|-----------------------------------------------------|-----------------------------|--------|----|---|-----------------------------|--------|----|---|
| TENS versus Corticosteroids                         | <b>-0.83 (-1.48, -0.19)</b> | 1 (40) | NA | + | <b>-0.89 (-1.54, -0.23)</b> | 1 (40) | NA | + |
| TENS plus Exercise versus Acupuncture plus Exercise | -0.41 (-1.10, 0.20)         | 1 (33) | NA | + | -0.30 (-0.99, 0.39)         | 1 (33) | NA | + |

### Surgery

|                                                                           |                      |           |    |   |                       |           |    |   |
|---------------------------------------------------------------------------|----------------------|-----------|----|---|-----------------------|-----------|----|---|
| Surgery versus Exercise                                                   | -0.16 (-0.45, 0.13)  | 2/2 (182) | 0  | + | -0.19 (-0.51, 0.12)   | 2/2 (182) | 15 | + |
| Primary Tendon Repair versus Physiotherapy with optional Secondary Repair | 0.33 (-0.05, 0.72)   | 1 (103)   | NA | + | 0.33 (-0.05 to 0.72)* | 1 (103)   | NA | + |
| Surgery versus Comprehensive Physiotherapy                                | 0.04 (-0.51 to 0.58) | 1 (55)    | NA | + | 0.04 (-0.51, 0.58)*   | 1 (55)    | NA | + |

### Nerve Block

|                            |                           |                 |   |   |                    |          |   |   |
|----------------------------|---------------------------|-----------------|---|---|--------------------|----------|---|---|
| Nerve Block versus Control | <b>0.43 (-0.00, 0.85)</b> | <b>2/2 (89)</b> | 0 | + | 0.29 (-0.13, 0.71) | 2/2 (89) | 0 | + |
|----------------------------|---------------------------|-----------------|---|---|--------------------|----------|---|---|

### Microwave Diathermy

|                                                     |                          |               |    |   |                          |               |    |   |
|-----------------------------------------------------|--------------------------|---------------|----|---|--------------------------|---------------|----|---|
| Microwave Diathermy versus Sham Microwave Diathermy | <b>2.98 (2.06, 3.91)</b> | <b>1 (40)</b> | NA | + | <b>2.00 (1.23, 2.77)</b> | <b>1 (40)</b> | NA | + |
|-----------------------------------------------------|--------------------------|---------------|----|---|--------------------------|---------------|----|---|

### Diacutaneous Fibrolysis

|                                                             |                    |         |    |   |                    |         |    |   |
|-------------------------------------------------------------|--------------------|---------|----|---|--------------------|---------|----|---|
| Diacutaneous Fibrolysis versus Sham Diacutaneous Fibrolysis | 0.20 (-0.24, 0.64) | 1 (80)  | NA | + | 0.34 (-0.10, 0.78) | 1 (80)  | NA | + |
| Diacutaneous Fibrolysis versus Control                      | 0.36 (-0.41, 1.14) | 1 (130) | 78 | + | 0.46 (-0.11, 1.03) | 1 (130) | NA | + |

### Acupuncture

|                                                              |                          |               |    |   |                          |               |    |   |
|--------------------------------------------------------------|--------------------------|---------------|----|---|--------------------------|---------------|----|---|
| Acupuncture plus Exercise versus Exercise                    | -0.03 (-0.42, 0.36)      | 1 (104)       | NA | + | 0.10 (-0.25, 0.46)       | 1 (125)       | NA | + |
| Electro-Acupuncture plus Exercise versus Exercise            | -0.00 (-0.39, 0.38)      | 1 (105)       | NA | + | 0.15 (-0.20, 0.50)       | 1 (126)       | NA | + |
| Acupuncture versus Sham Acupuncture or other Sham Treatments | -0.50 (-1.31, 0.32)      | 1 (24)        | NA | + | -0.50 (-1.31, 0.32)*     | 1 (24)        | NA | + |
| Acupuncture plus Exercise versus TENS plus Exercise          | 0.41 (-0.28, 1.10)       | 1 (33)        | NA | + | 0.30 (-0.39, 0.99)       | 1 (24)        | NA | + |
| Laser Acupuncture versus Sham                                | <b>0.82 (0.30, 1.34)</b> | <b>1 (62)</b> | NA | + | <b>0.82 (0.30, 1.34)</b> | <b>1 (62)</b> | NA | + |

### Myofascial Trigger Point Therapy

|                                                |                    |        |    |   |                    |        |    |   |
|------------------------------------------------|--------------------|--------|----|---|--------------------|--------|----|---|
| Myofascial Trigger Point versus Manual Therapy | 0.29 (-0.35, 0.93) | 1 (38) | NA | + | 0.29 (-0.35, 0.93) | 1 (38) | NA | + |
|------------------------------------------------|--------------------|--------|----|---|--------------------|--------|----|---|

### Platelet Rich Plasma

|                                          |                    |        |    |   |                     |        |    |   |
|------------------------------------------|--------------------|--------|----|---|---------------------|--------|----|---|
| Platelet Rich Plasma versus Dry Needling | 0.62 (-0.11, 1.36) | 1 (30) | NA | + | -0.07 (-0.70, 0.56) | 1 (39) | NA | + |
|------------------------------------------|--------------------|--------|----|---|---------------------|--------|----|---|

### Massage

|                                                   |                     |        |    |   |                     |        |    |   |
|---------------------------------------------------|---------------------|--------|----|---|---------------------|--------|----|---|
| Tensegrity Massage versus Classic Swedish Massage | -0.52 (-1.25, 0.21) | 1 (30) | NA | + | -0.60 (-1.33, 0.14) | 1 (30) | NA | + |
|---------------------------------------------------|---------------------|--------|----|---|---------------------|--------|----|---|

Abbreviations: SMD = Standardized Mean Difference, N = Number of comparisons, trials (Number of patients in trial),  $I^2$  = Percentage of the variability due to Heterogeneity rather than sampling error (i.e. chance); GRADE = Grading of Recommendations Assessment, Development, and Evaluation. GRADE ratings are: ++++ high quality evidence, +++ moderate quality evidence, ++ low quality evidence, + very low quality evidence (meaning: We have very little confidence in the effect estimate: The true effect is likely to be substantially different from the estimate of effect.). \* = Only one follow-up time point available (i.e. longest and shortest time point analysis in this meta-analysis based on same time-point).
