# Supplementary material
Source: HighWire-hosted journal article supplement (https://bjsm.bmj.com/content/bjsports-2016-096515)
Supplement: inline-supplementary-material-6 [file inline-supplementary-material-6.pdf]

# Appendix 4b Forest Plots Function

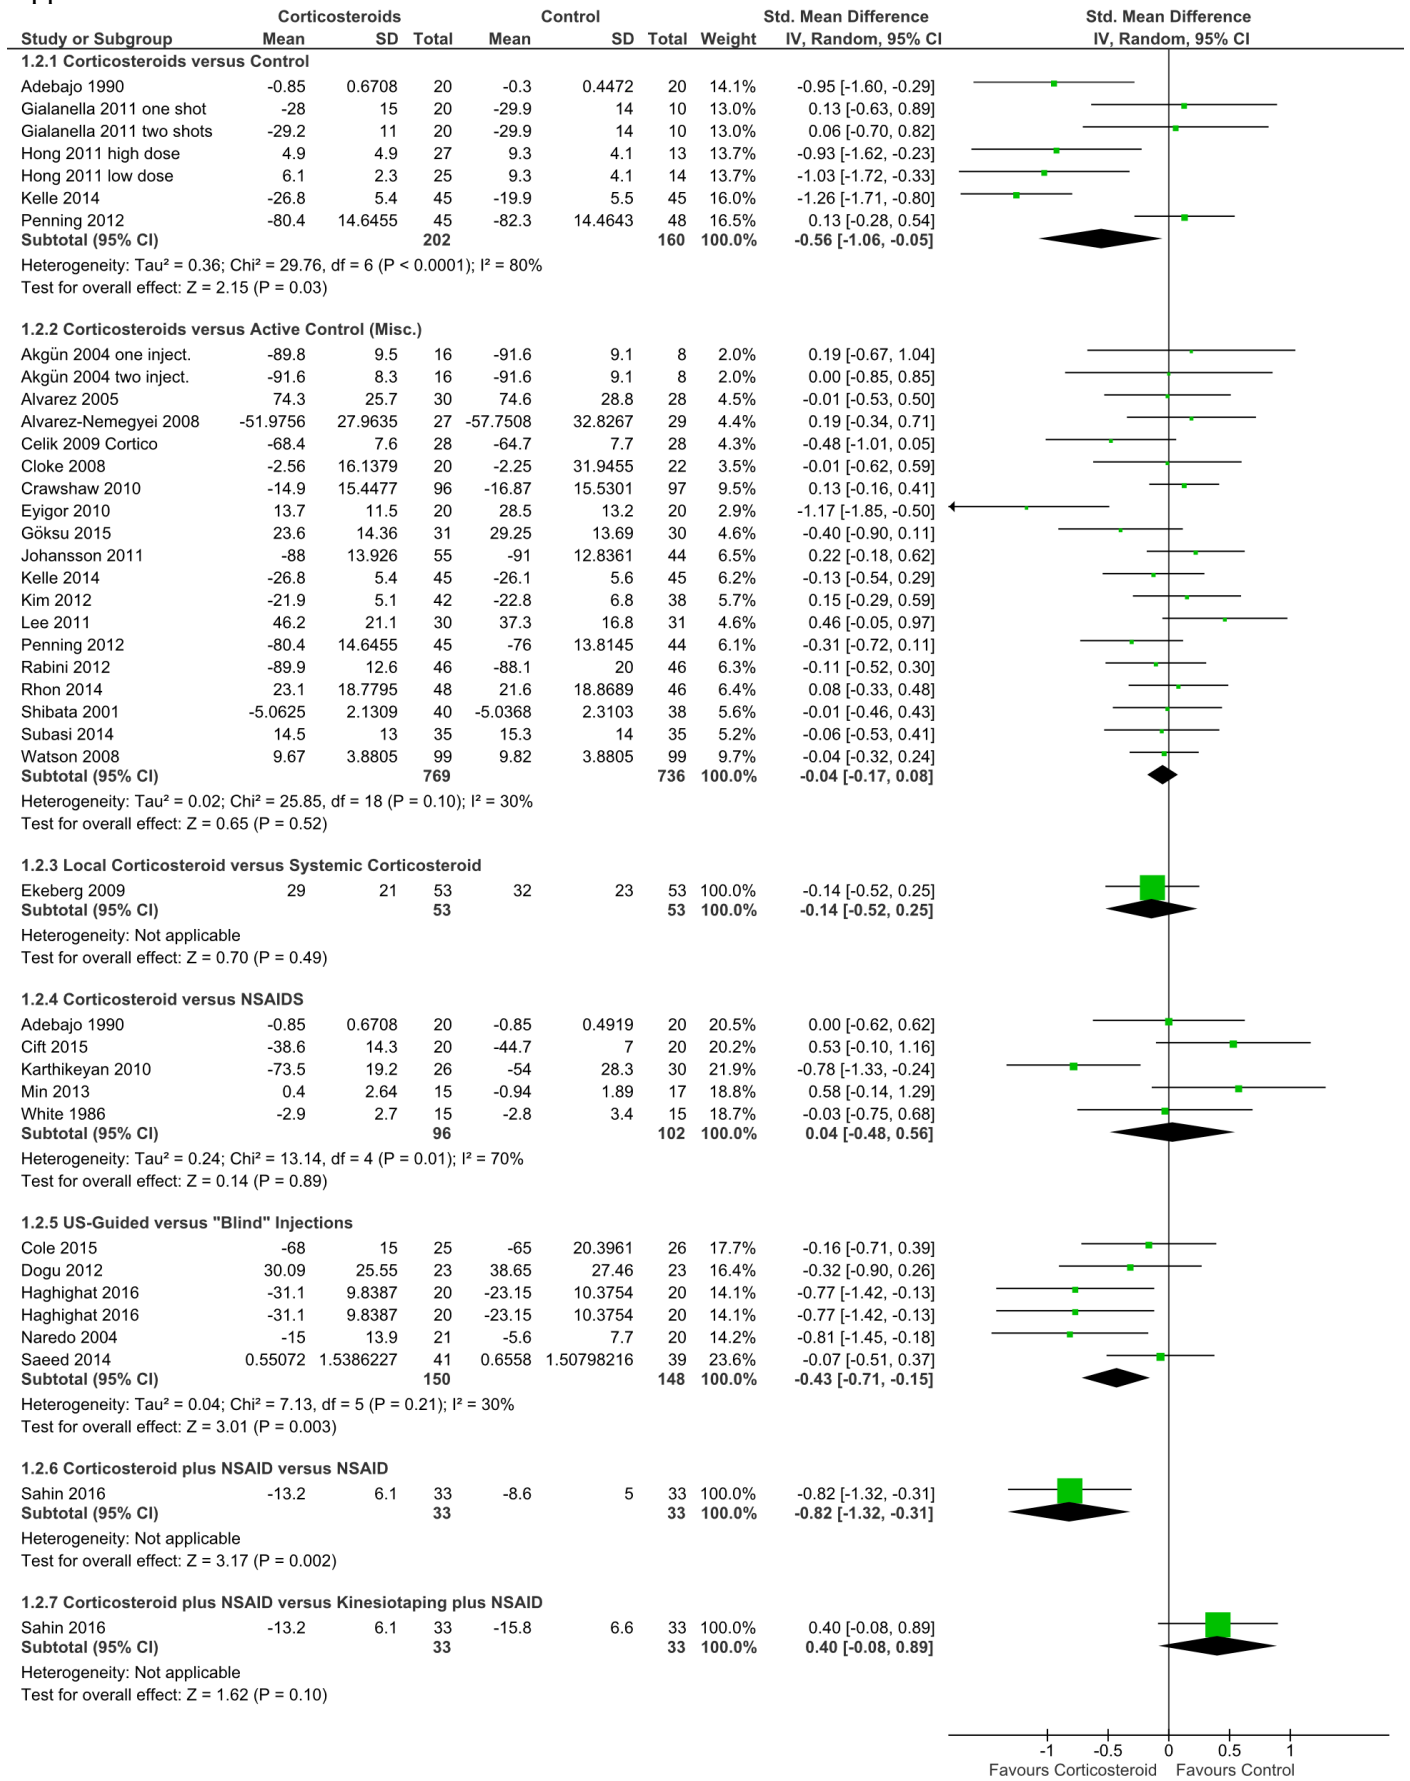

Figure Appendix-4b 1. Steroids: Outcome function at the longest follow-up

## Appendix 4b Forest Plots Function

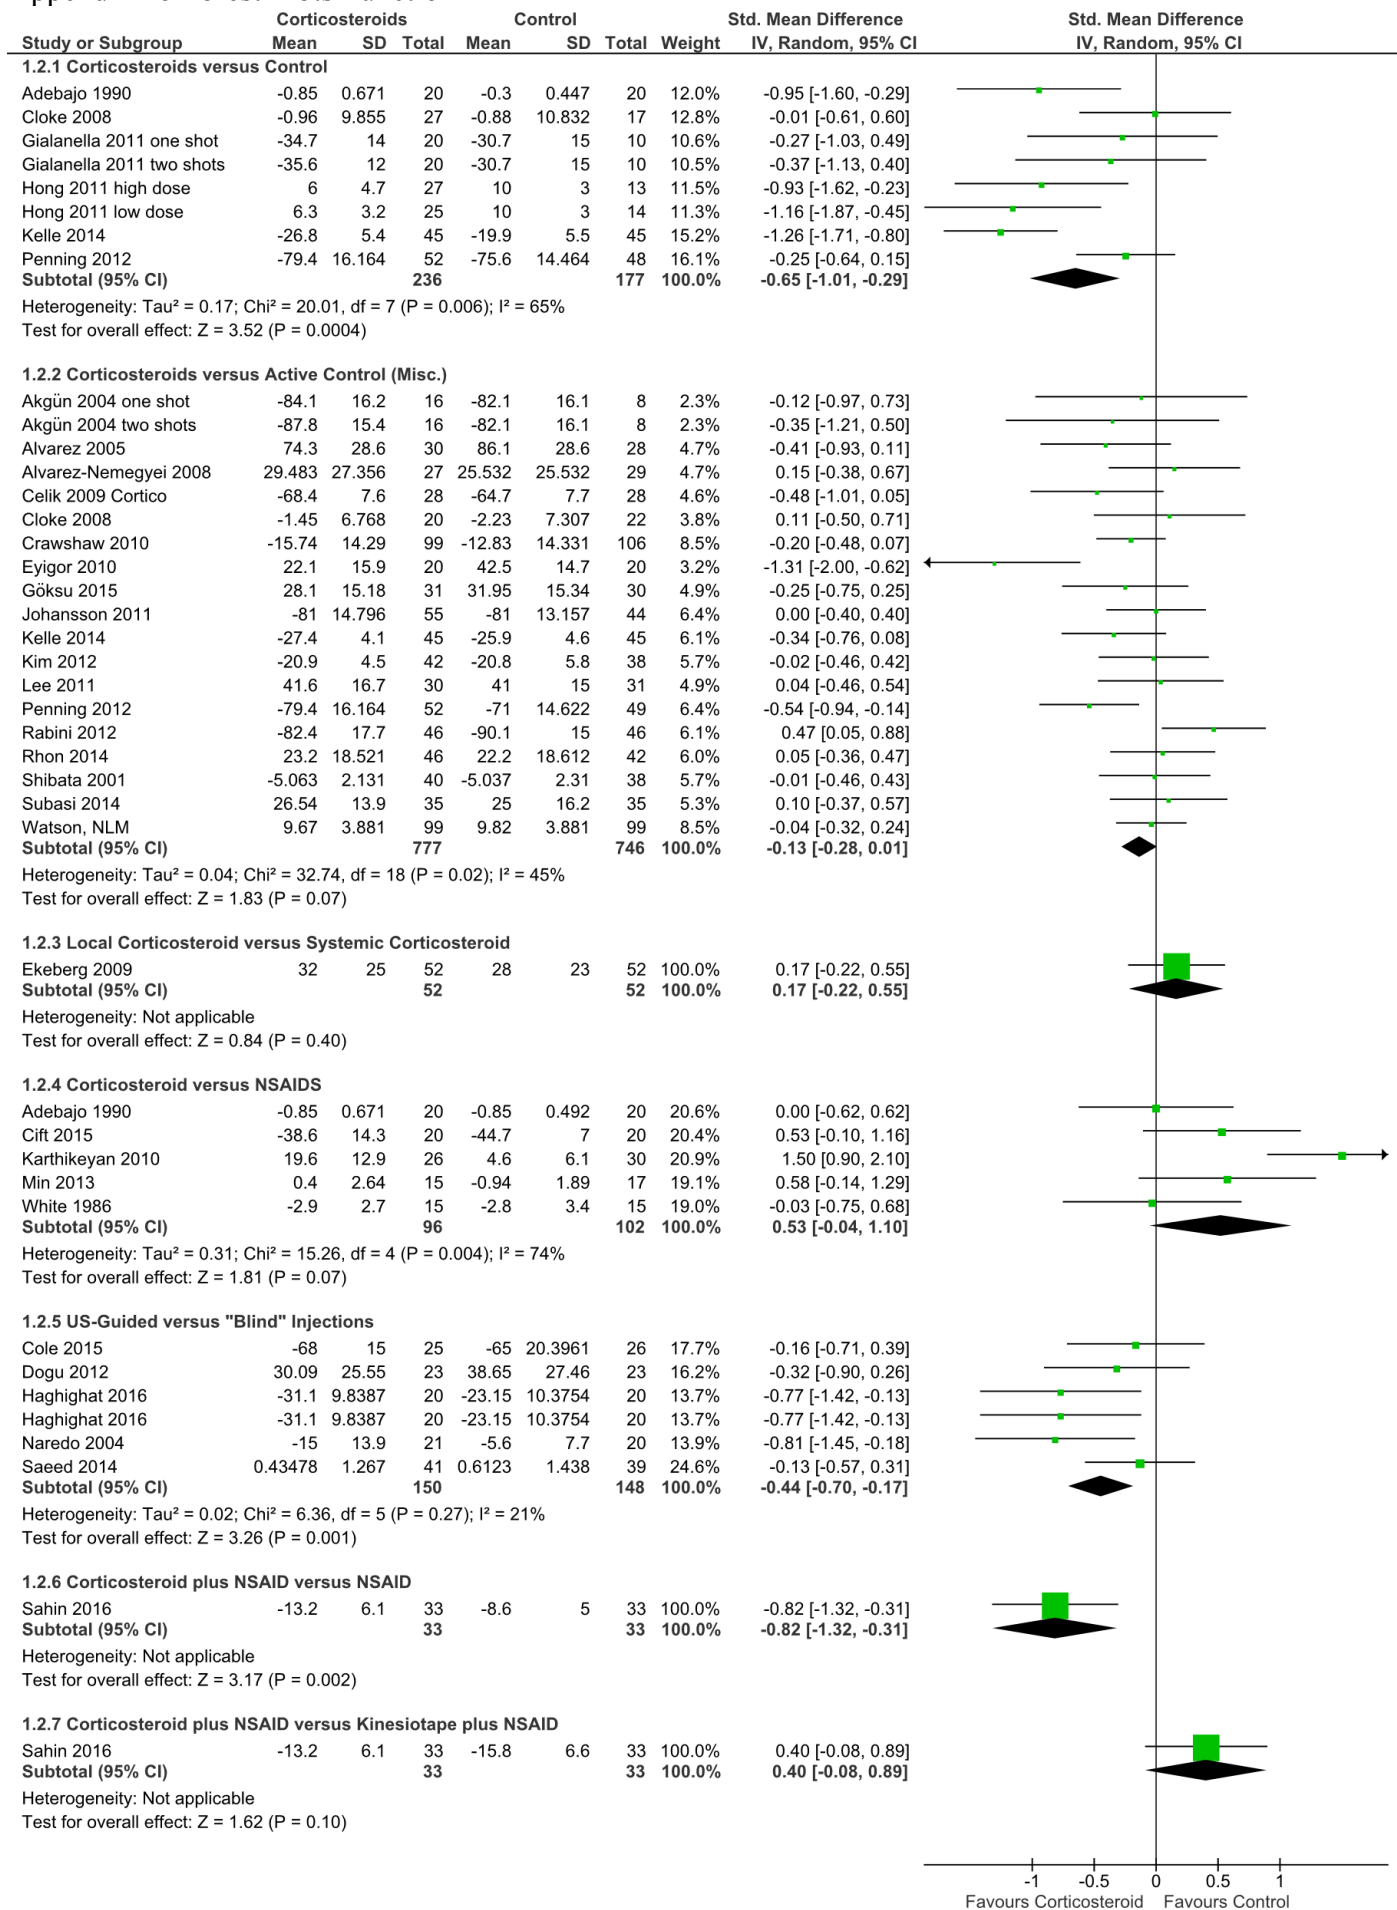

Figure Appendix-4b 2. Steroids: Outcome function at the shortest follow-up

## Appendix 4b Forest Plots Function

## Appendix 4b Forest Plots Function

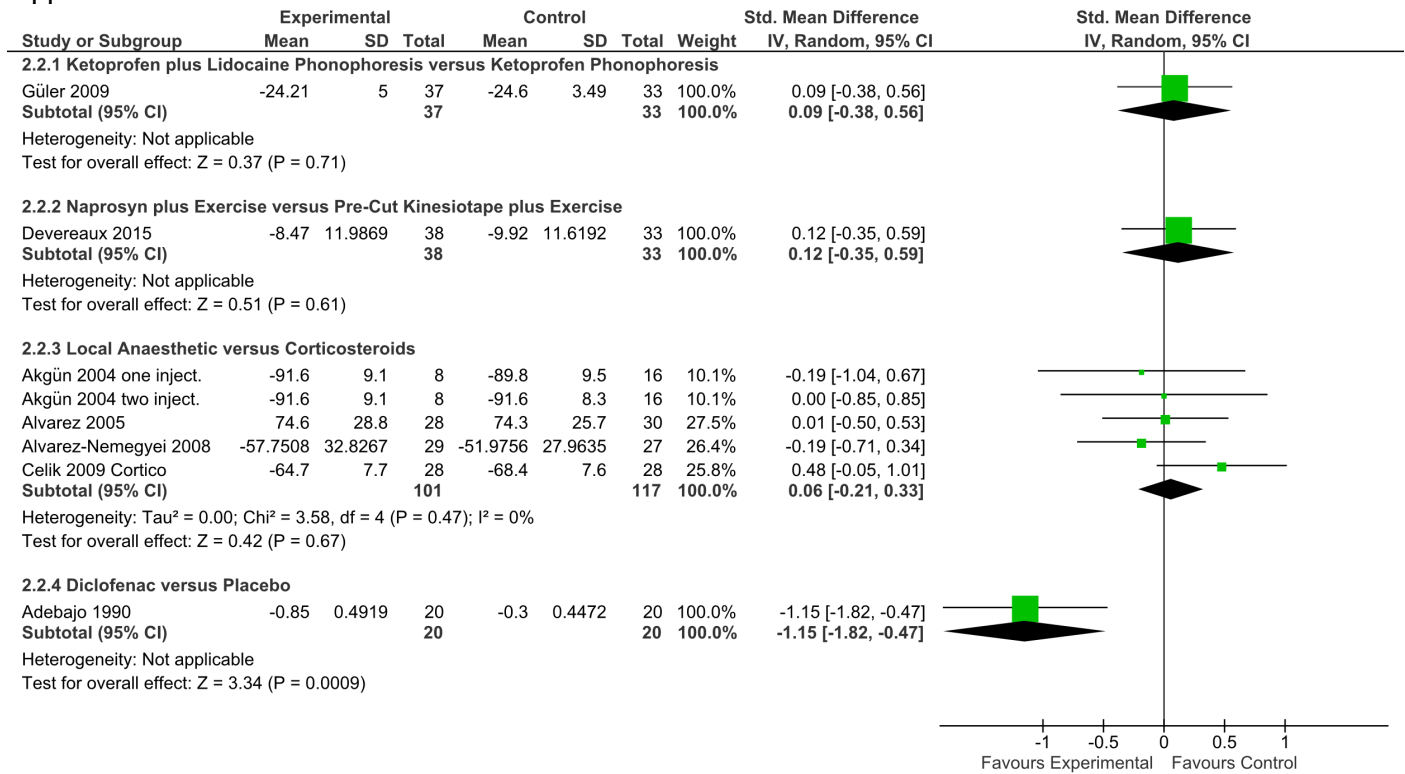

Figure Appendix-4b 3. Medications, and anaesthetic patch: Outcome function at the longest follow-up

## Appendix 4b Forest Plots Function

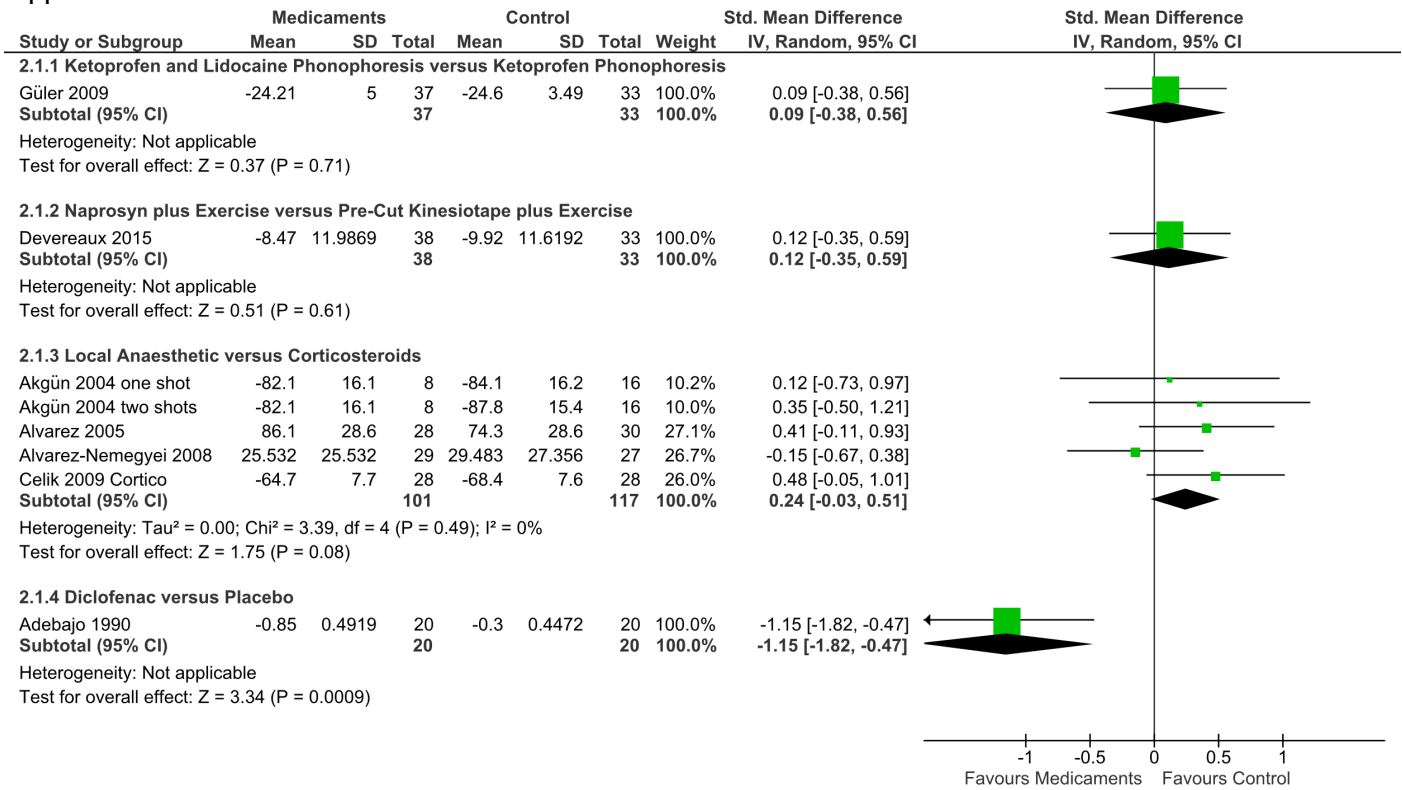

Figure Appendix-4b 4. Medications, and anaesthetic patch: Outcome function at the shortest follow-up

# Appendix 4b Forest Plots Function

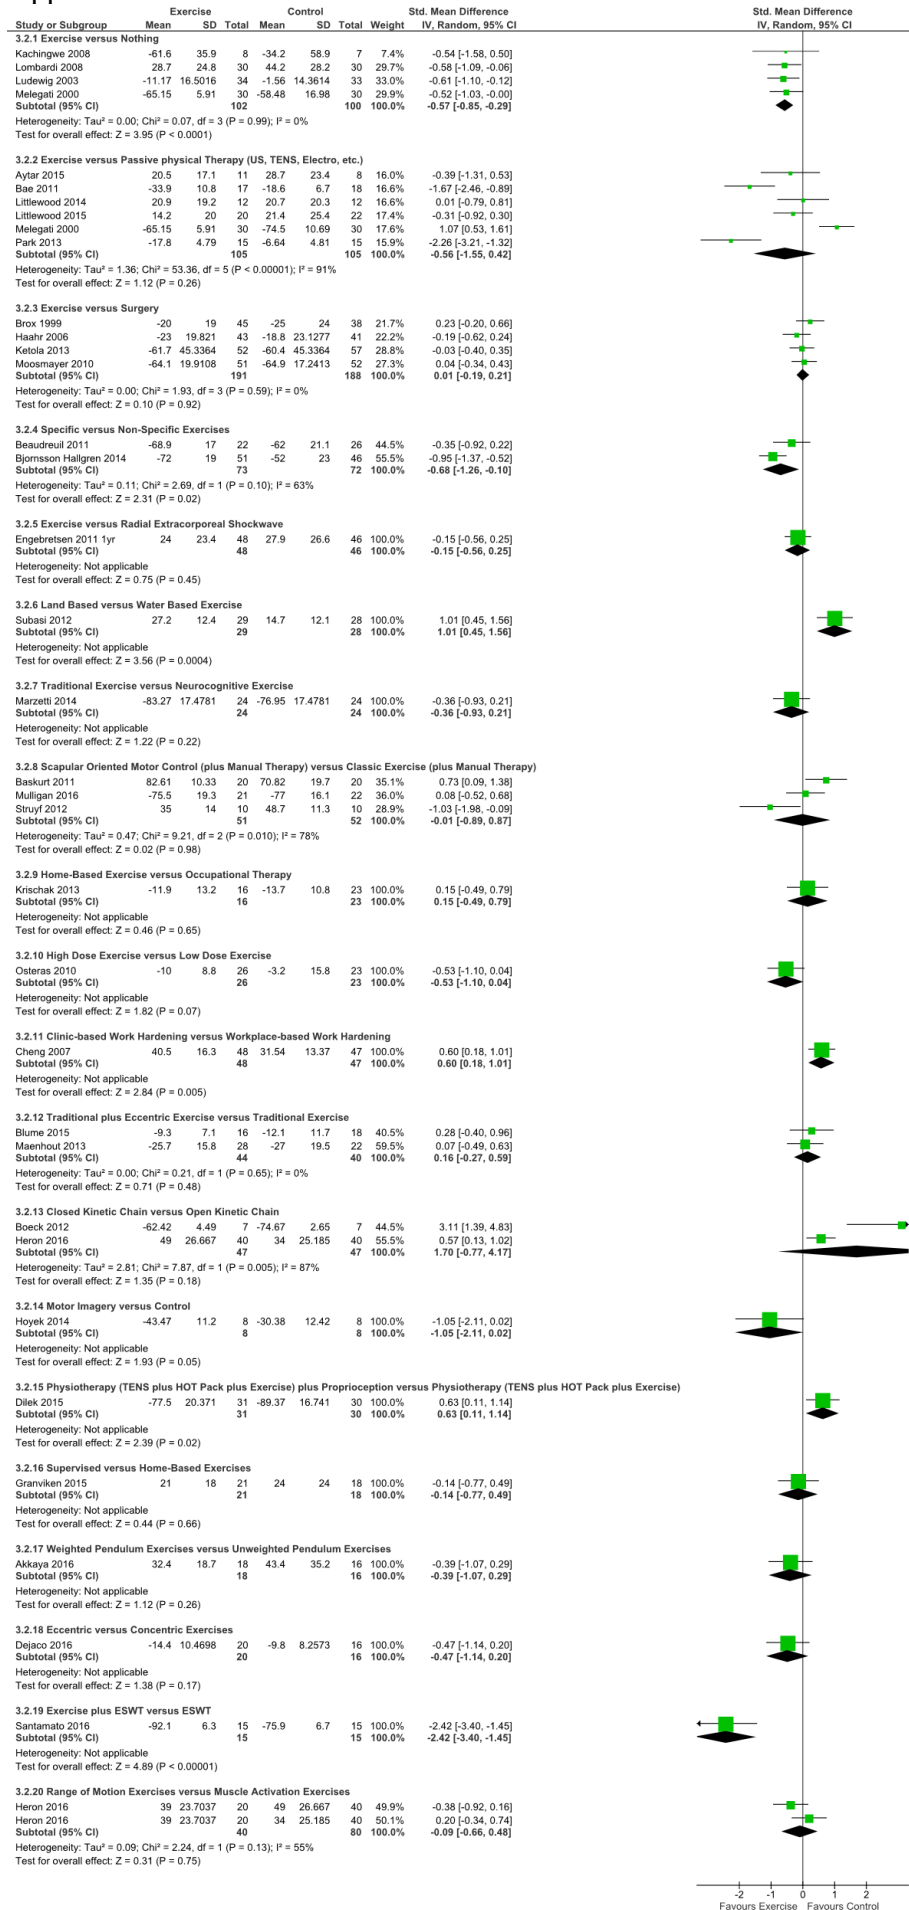

Figure Appendix-4b 5. Exercise: Outcome function at the longest follow-up

# Appendix 4b Forest Plots Function

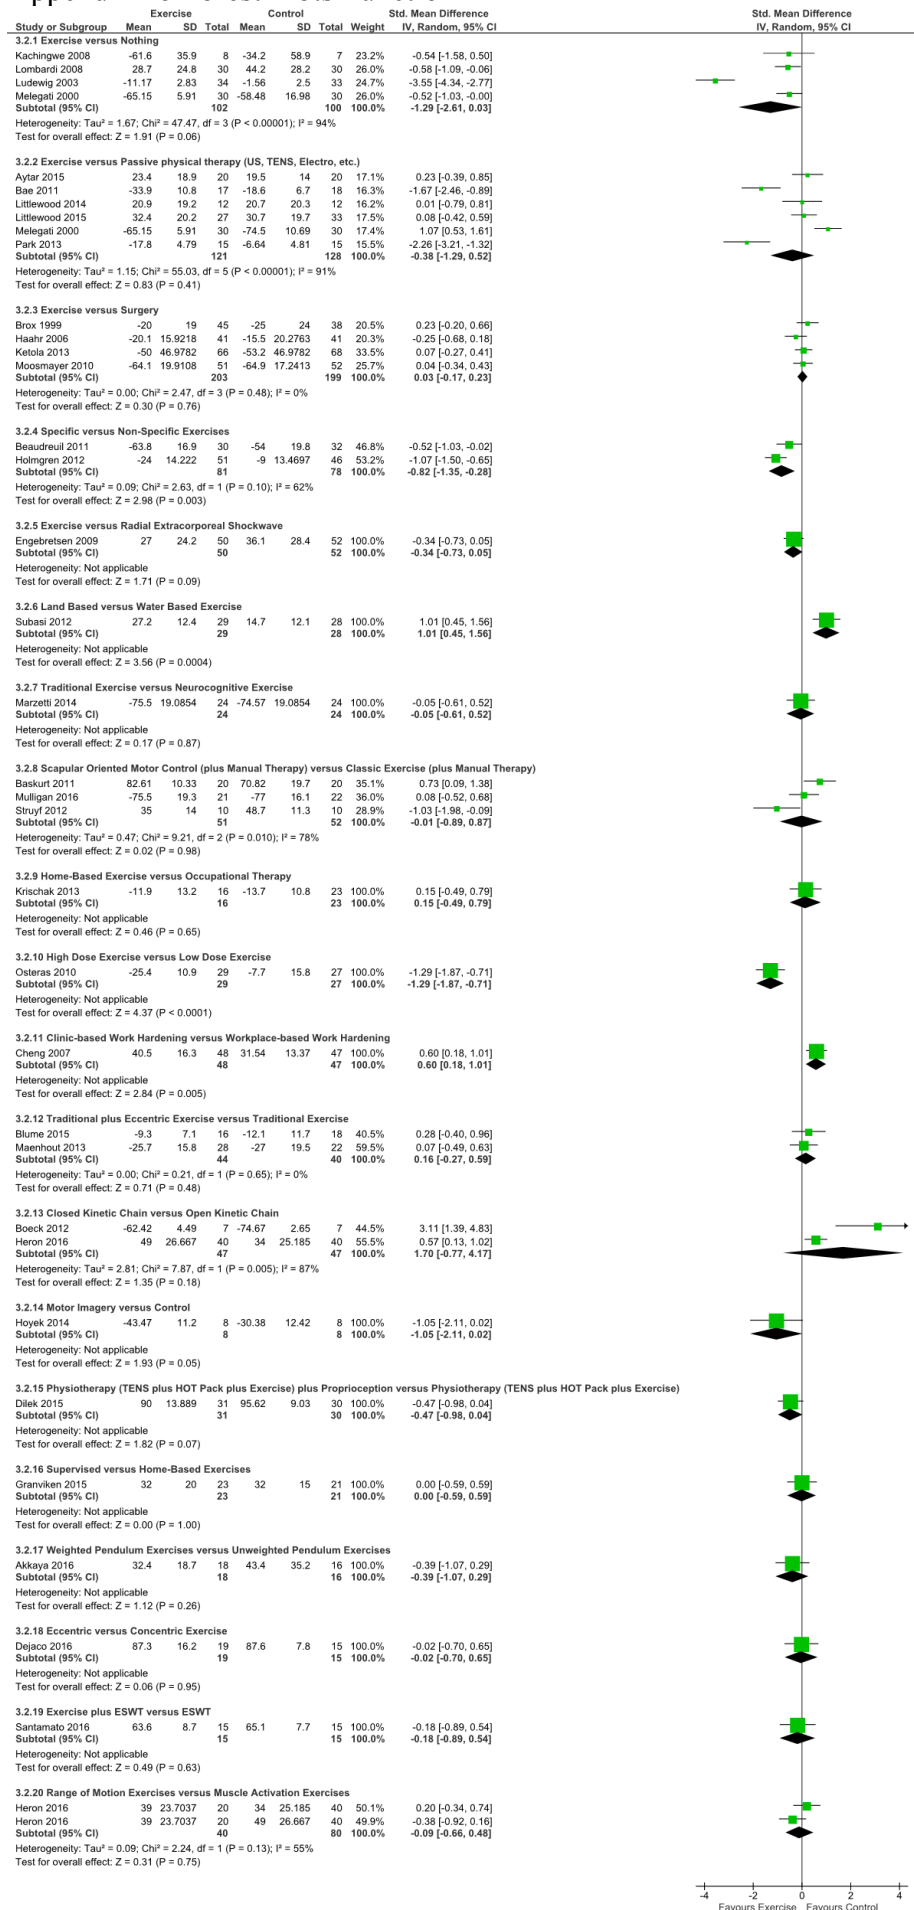

Figure Appendix-4b 6. Exercise: Outcome function at the shortest follow-up

## Appendix 4b Forest Plots Function

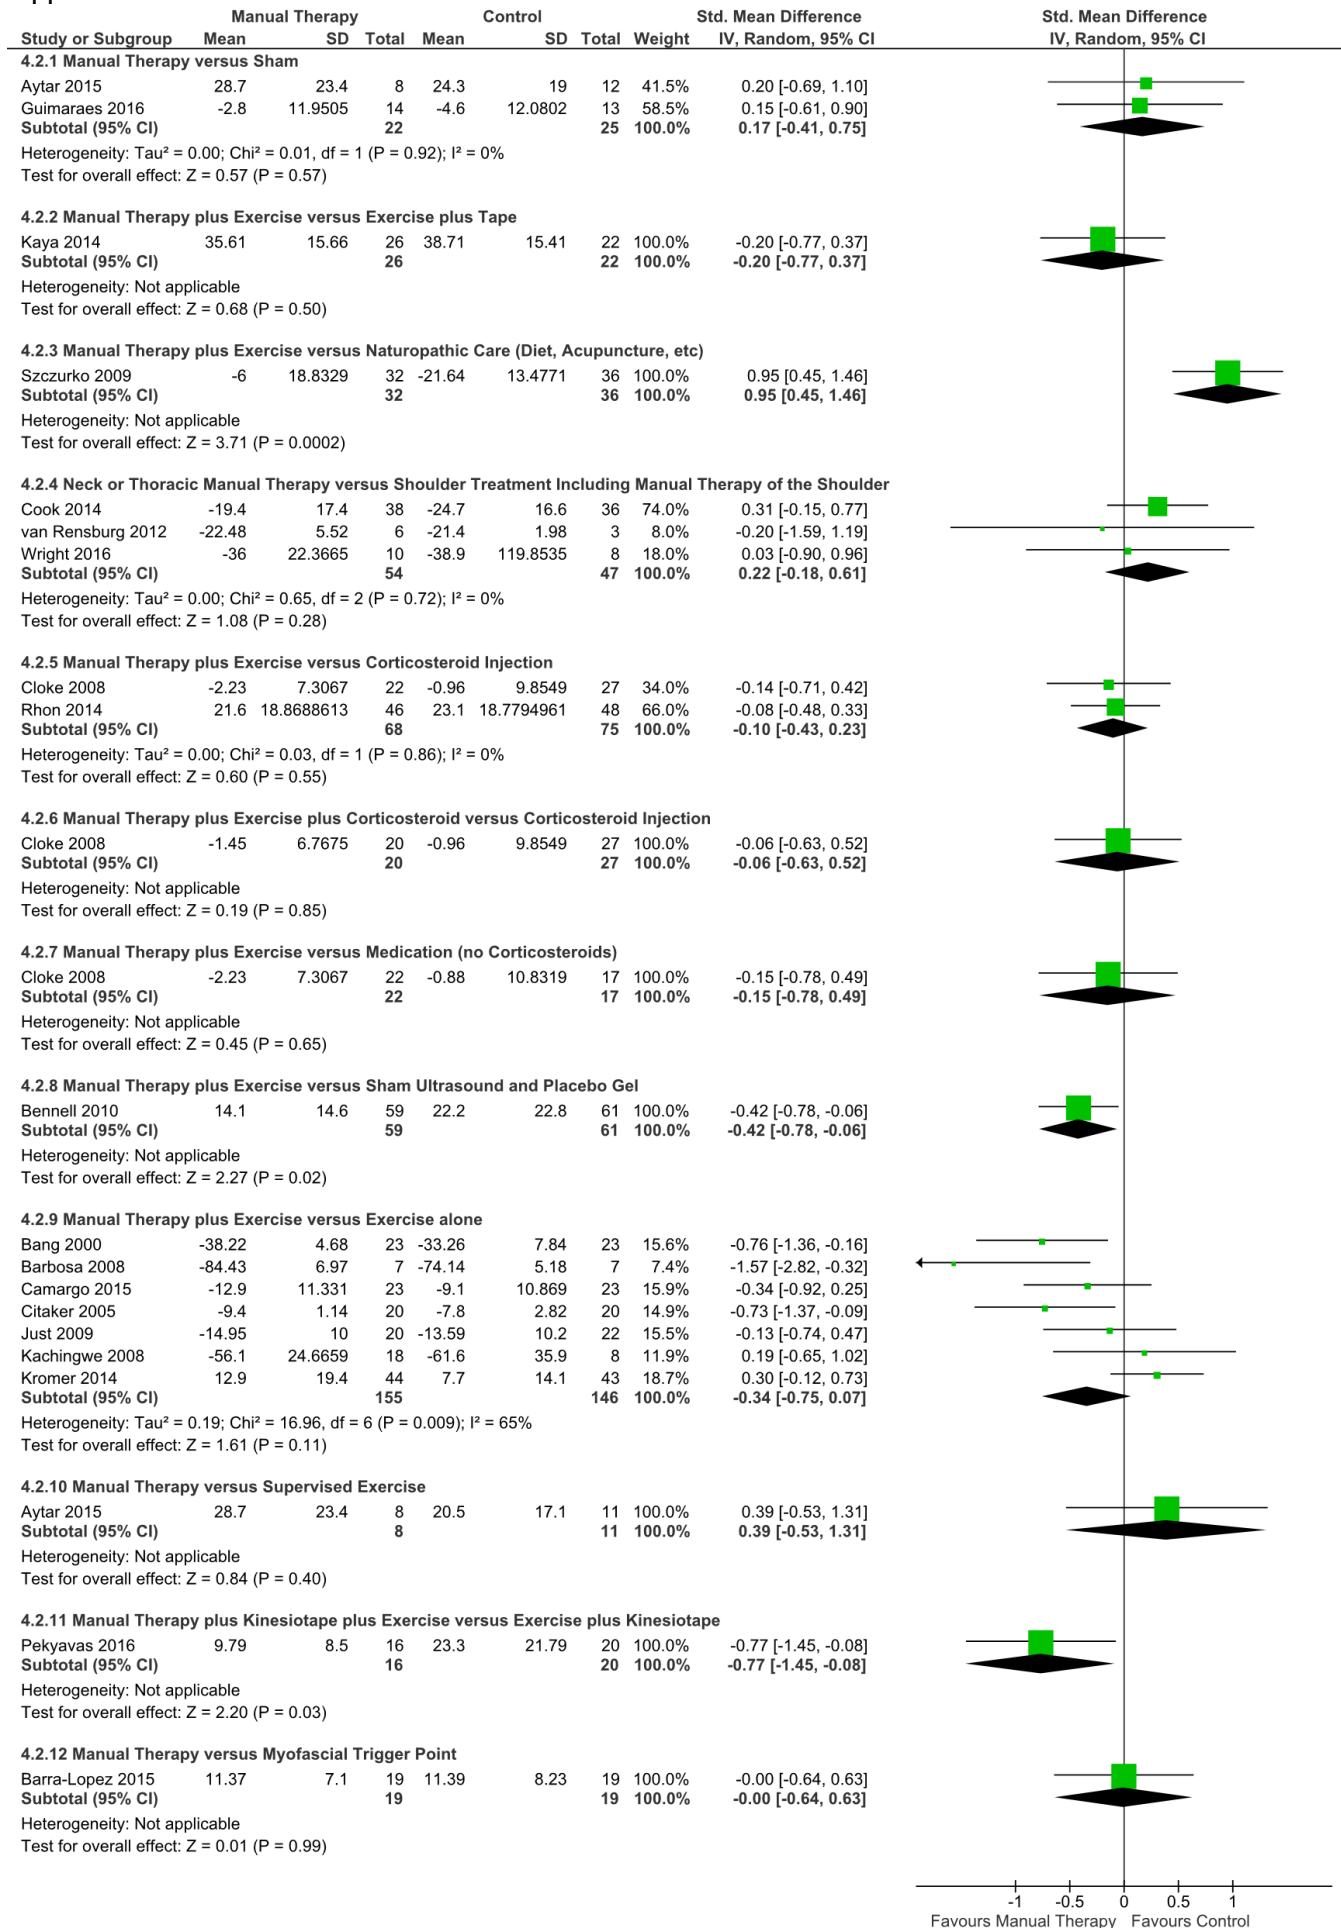

Figure Appendix-4b 7. Manual therapy: Outcome function at the longest follow-up



## Appendix 4b Forest Plots Function

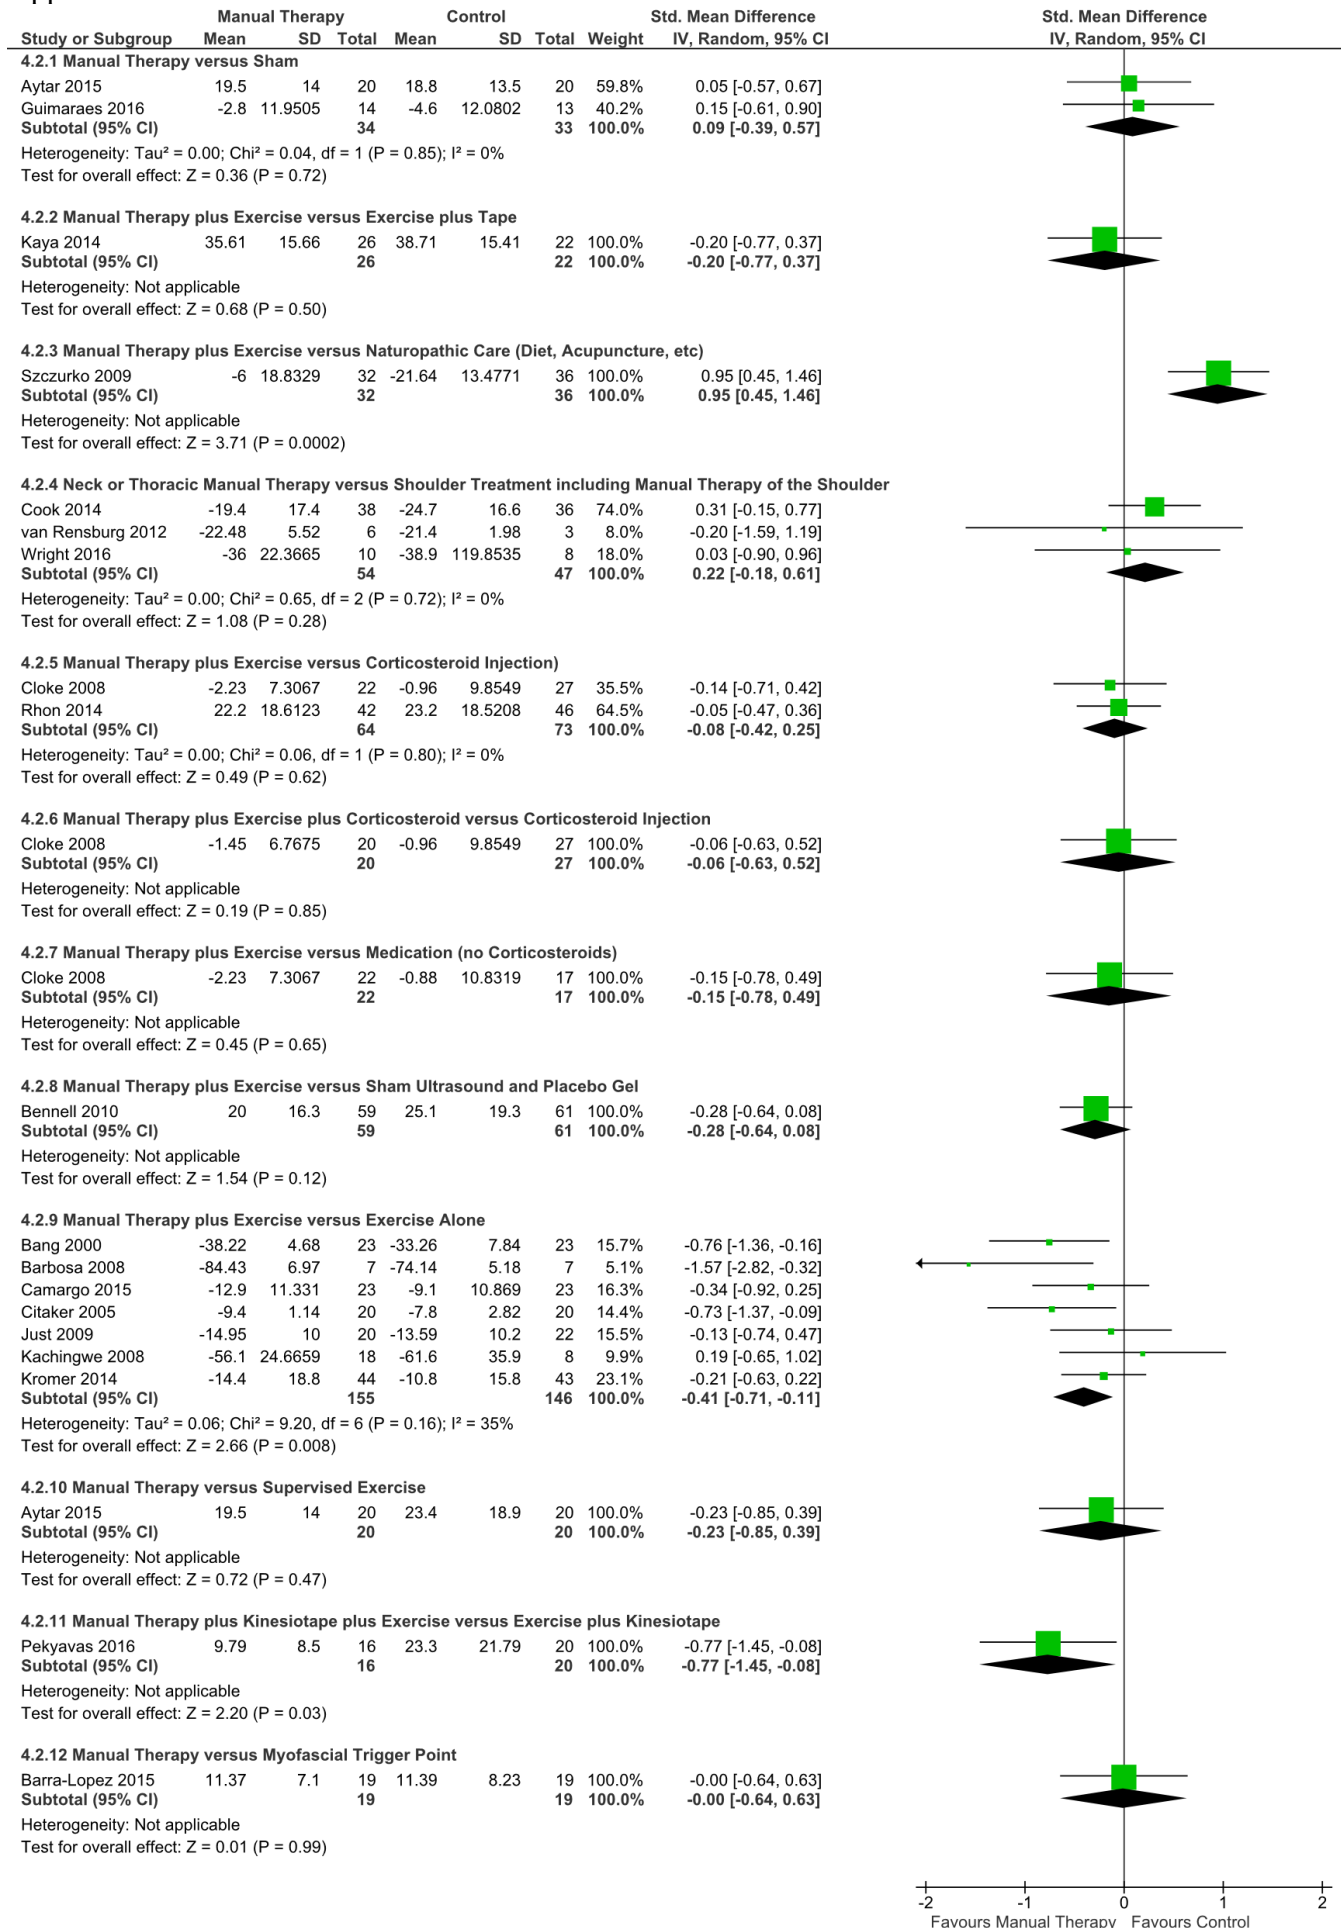

Figure Appendix-4b 8. Manual therapy: Outcome function at the shortest follow-up

## Appendix 4b Forest Plots Function

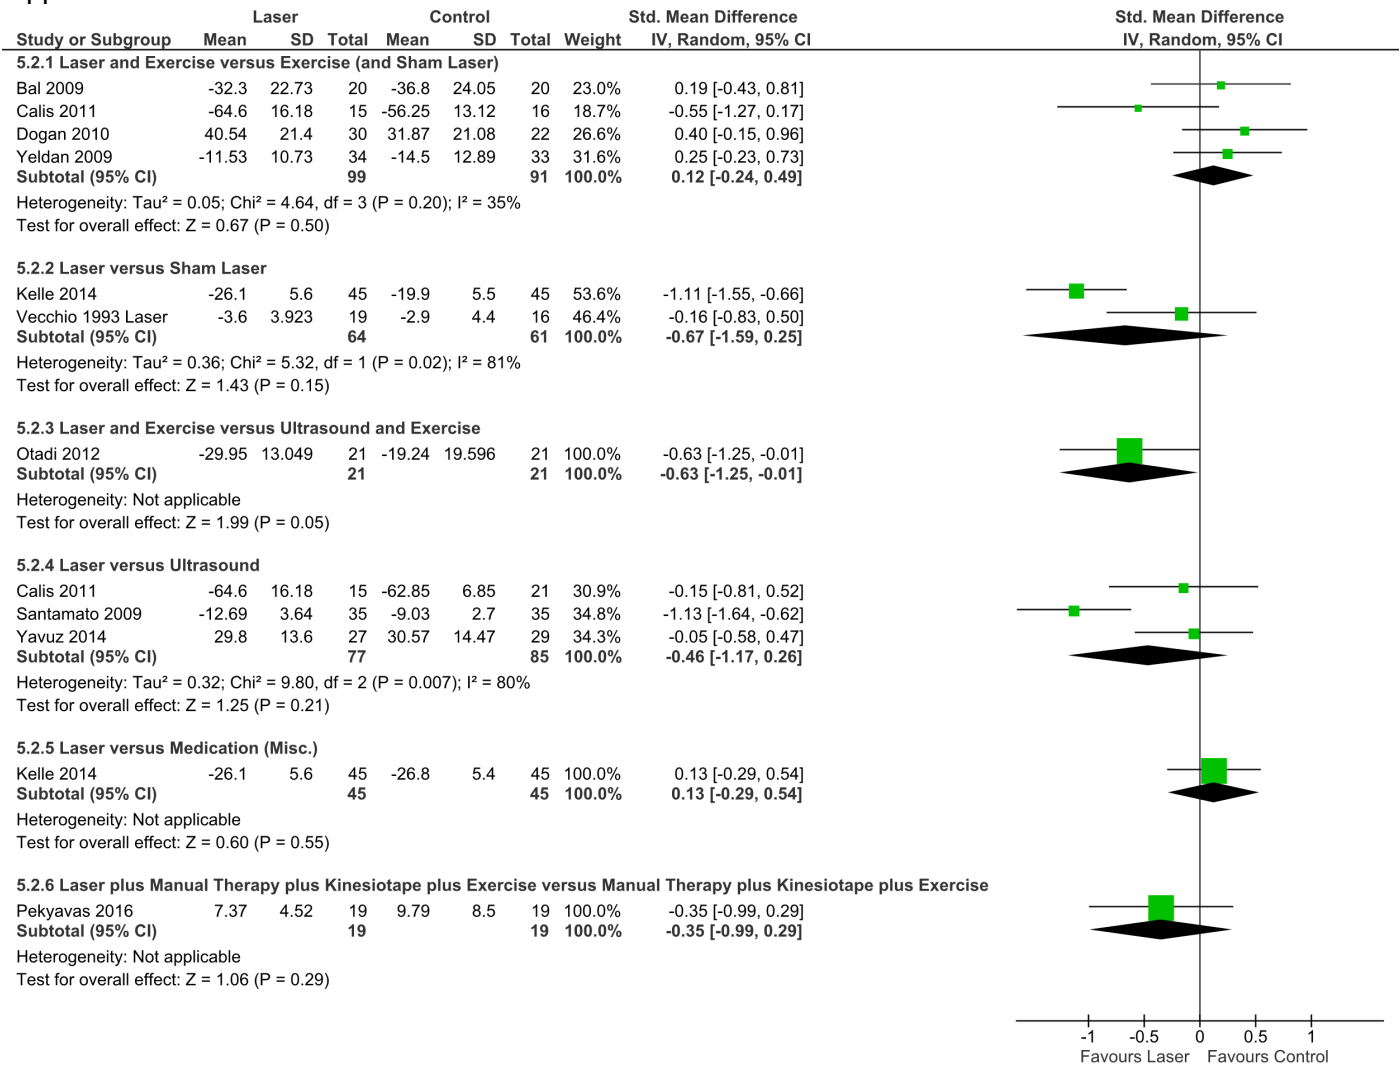

Figure Appendix-4b 9. Laser: Outcome function at the longest follow-up

## Appendix 4b Forest Plots Function

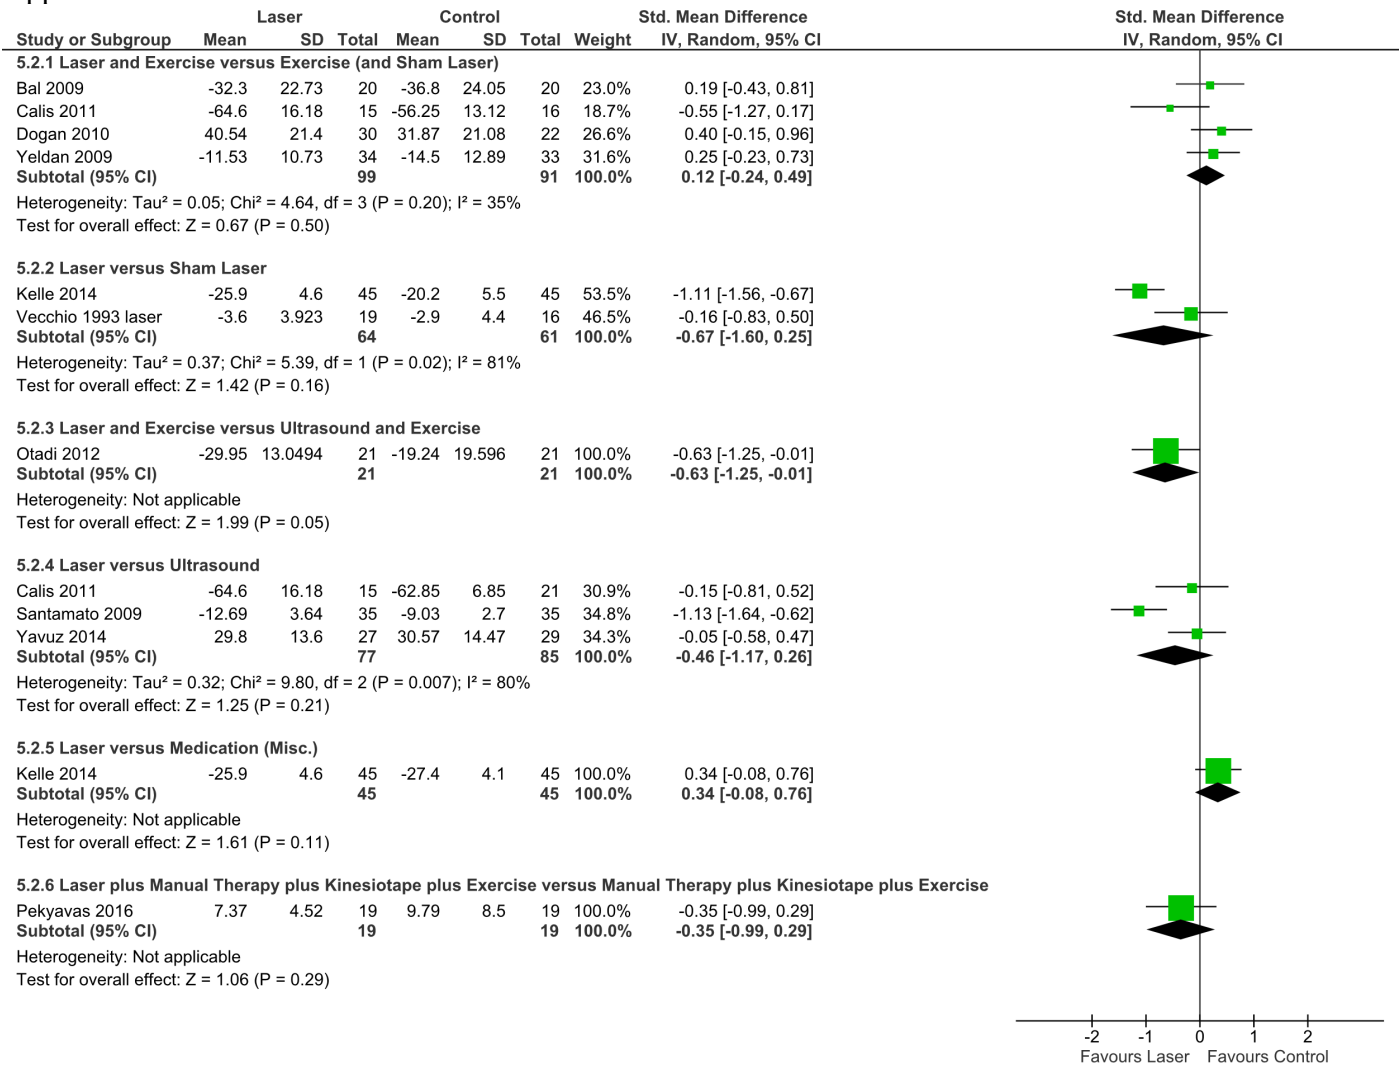

Figure Appendix-4b 10. Laser: Outcome function at the shortest follow-up

## Appendix 4b Forest Plots Function

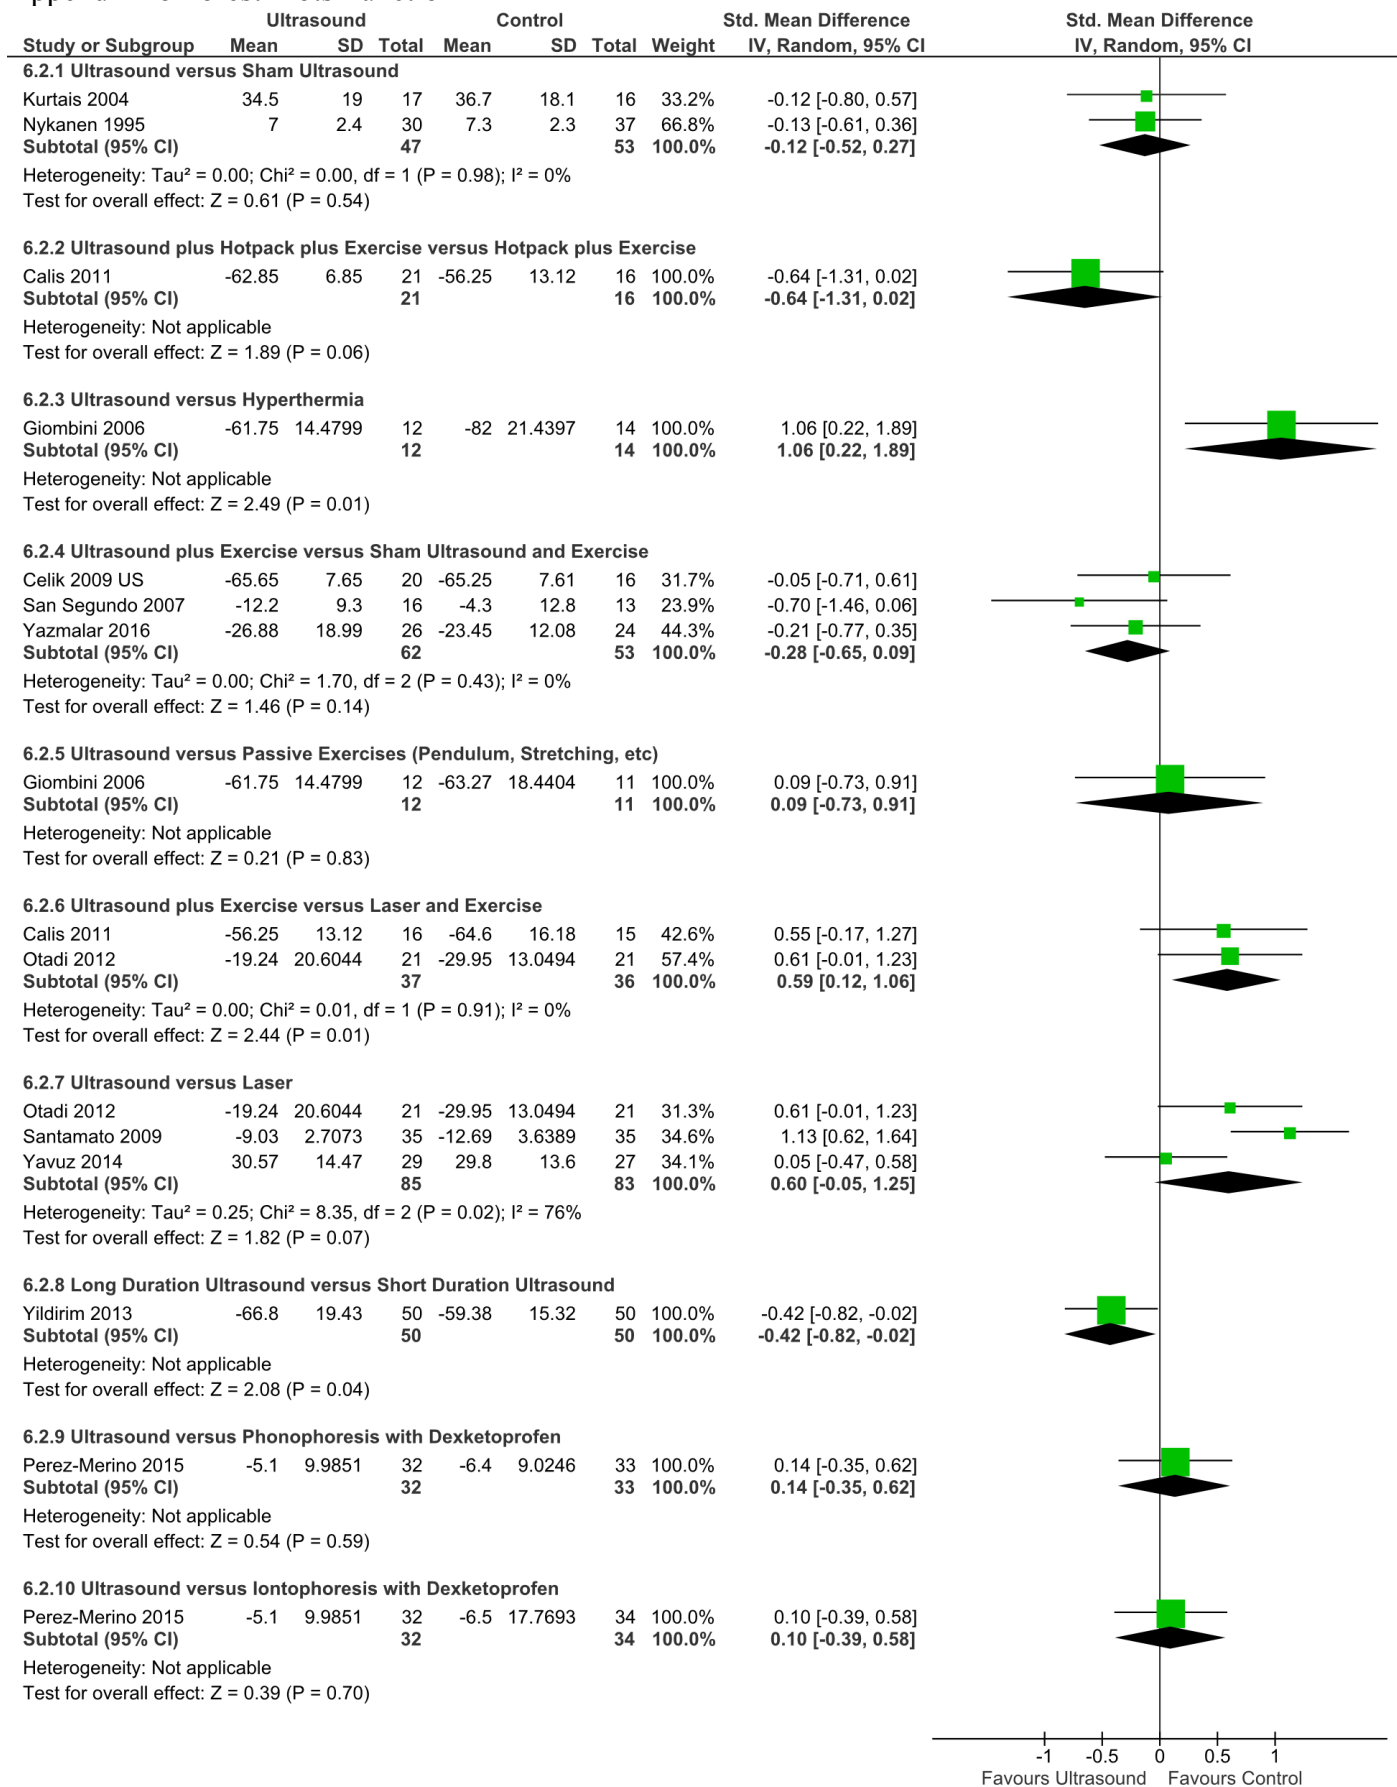

Figure Appendix-4b 11. Ultrasound: Outcome function at the longest follow-up

## Appendix 4b Forest Plots Function

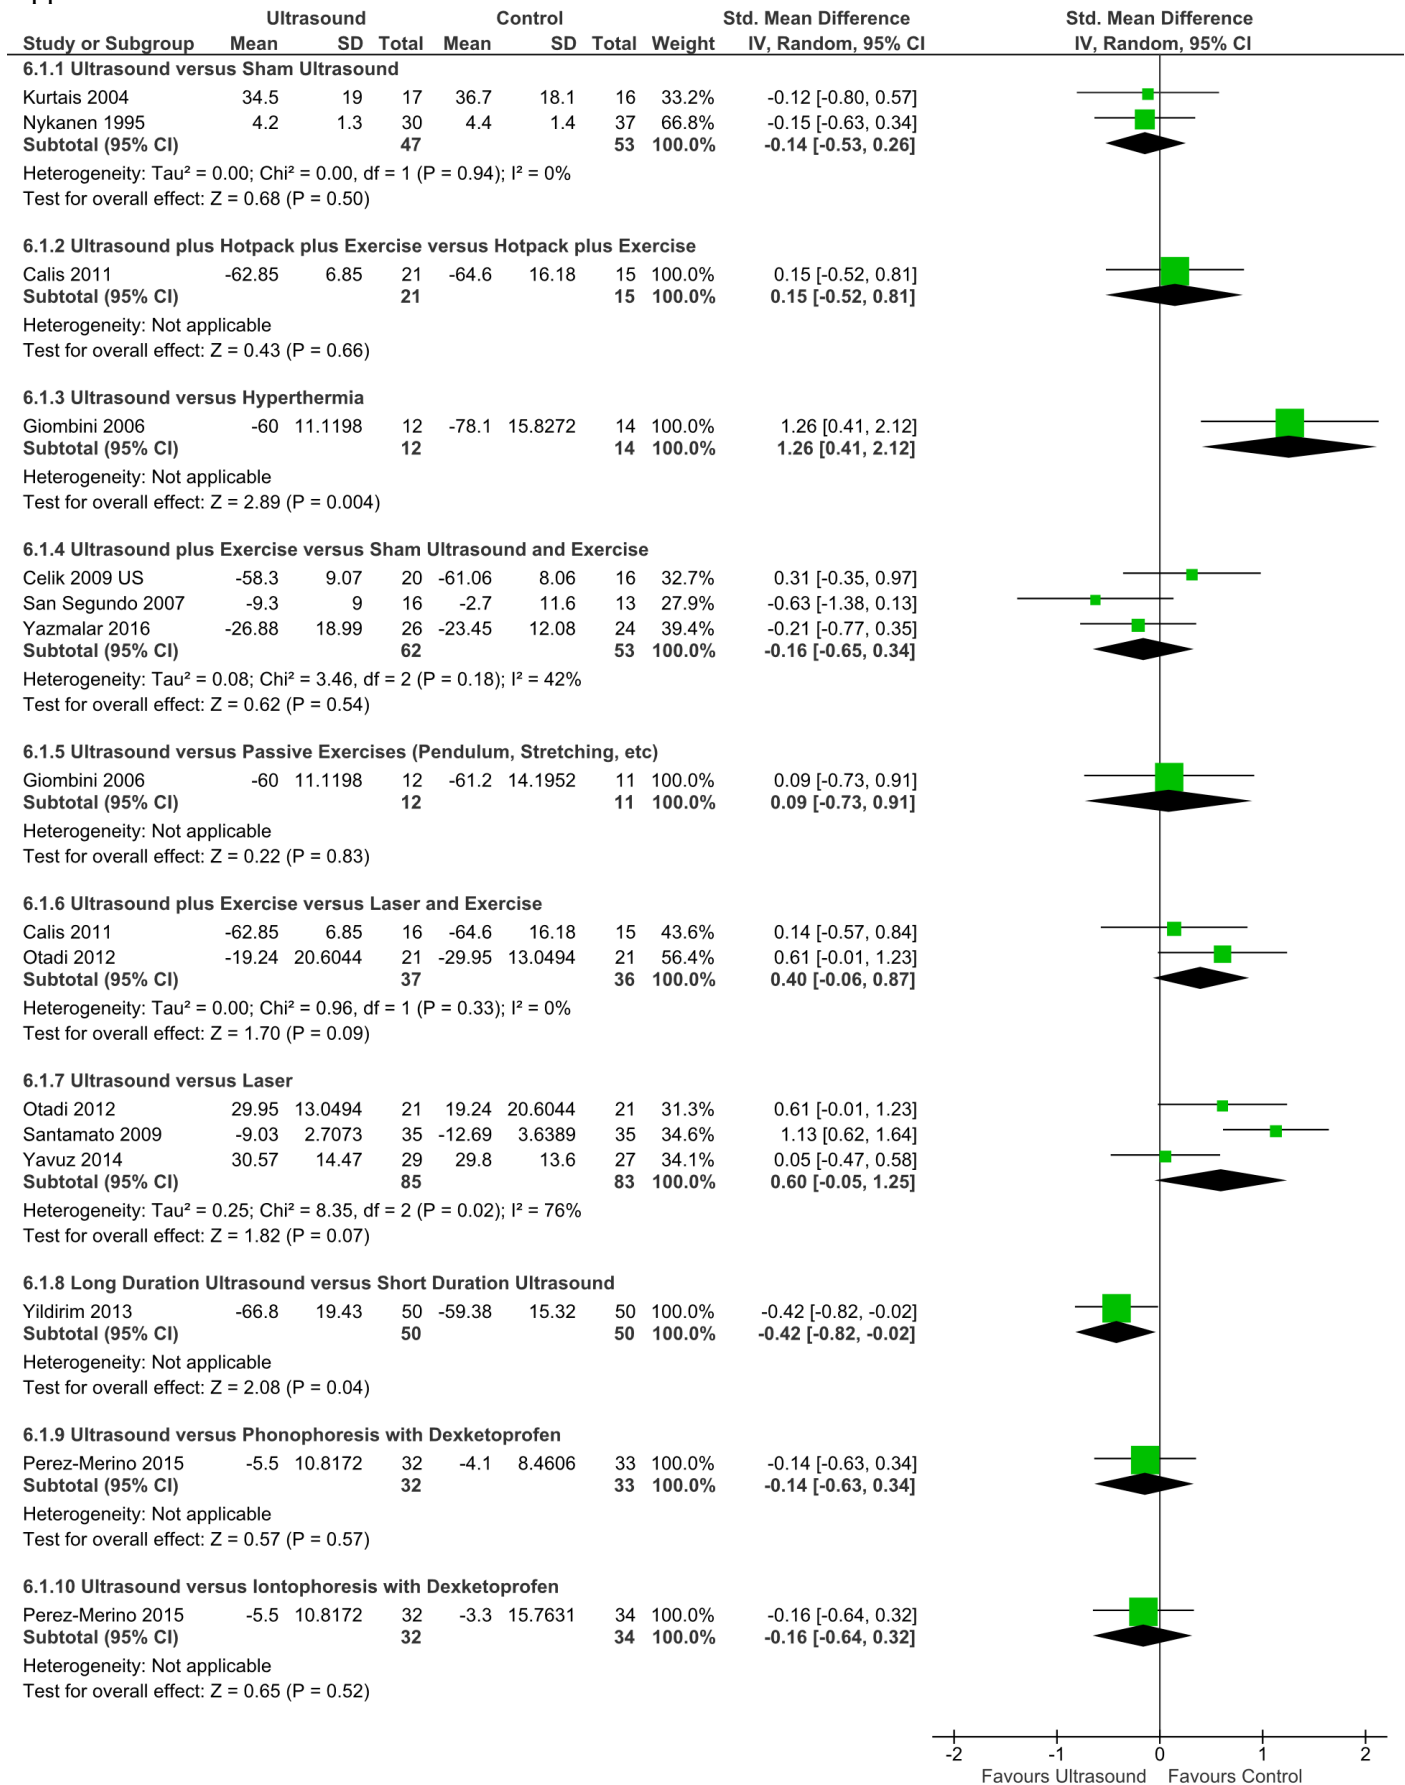

Figure Appendix-4b 12. Ultrasound: Outcome function at the shortest follow-up

## Appendix 4b Forest Plots Function

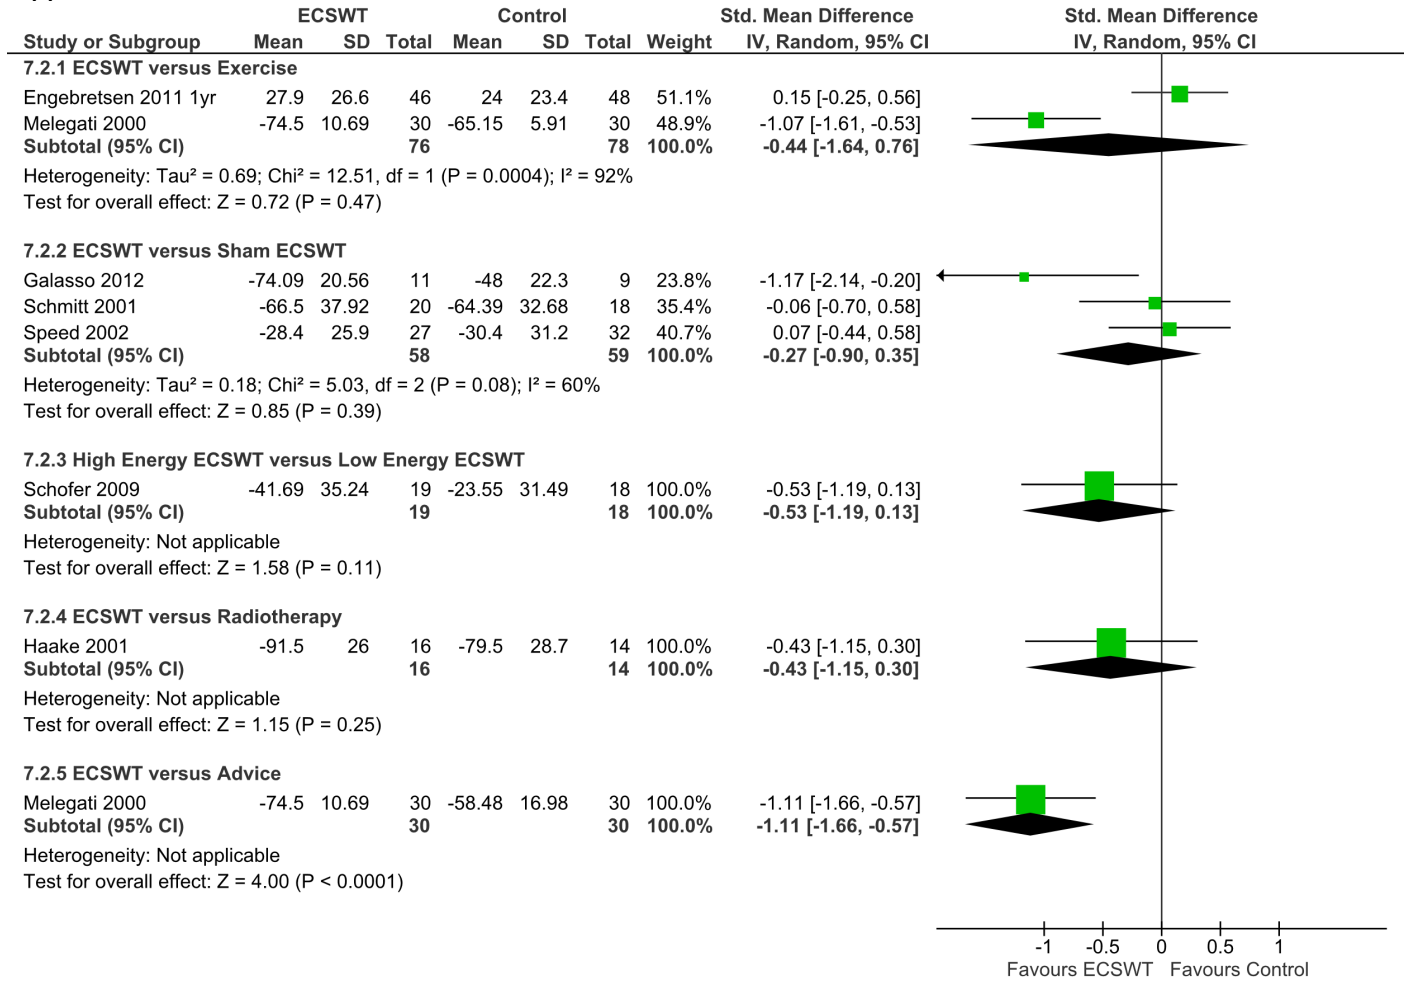

Figure Appendix-4b 13. Extracorporeal shockwave therapy (ECSWT): Outcome function at the longest follow-up

## Appendix 4b Forest Plots Function

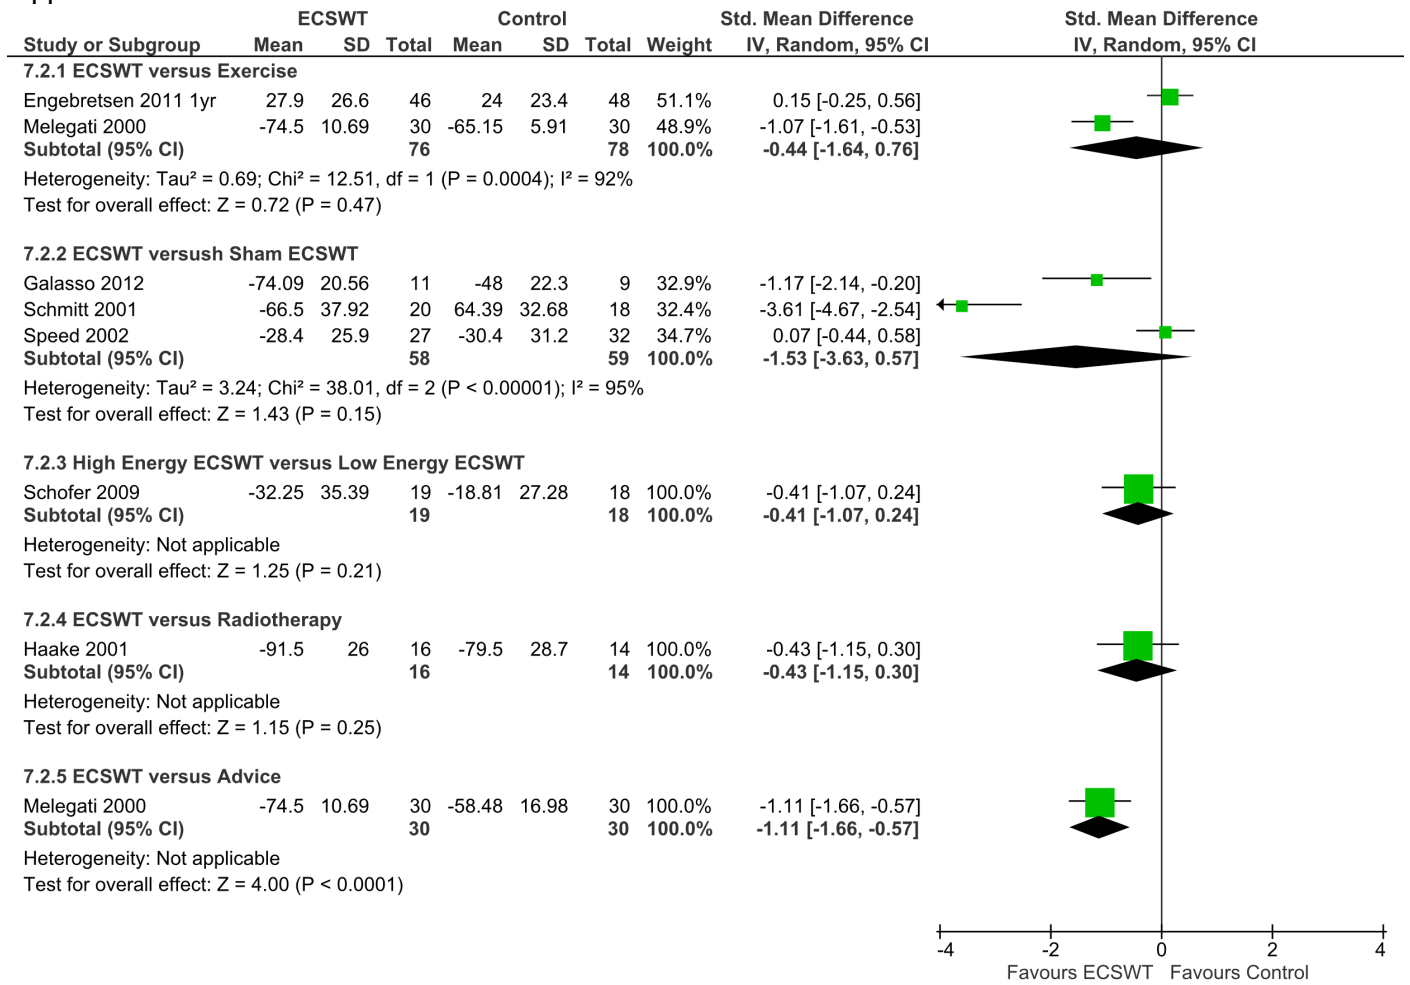

Figure Appendix-4b 14. Extracorporeal shockwave therapy (ECSWT): Outcome function at the shortest follow-up

## Appendix 4b Forest Plots Function

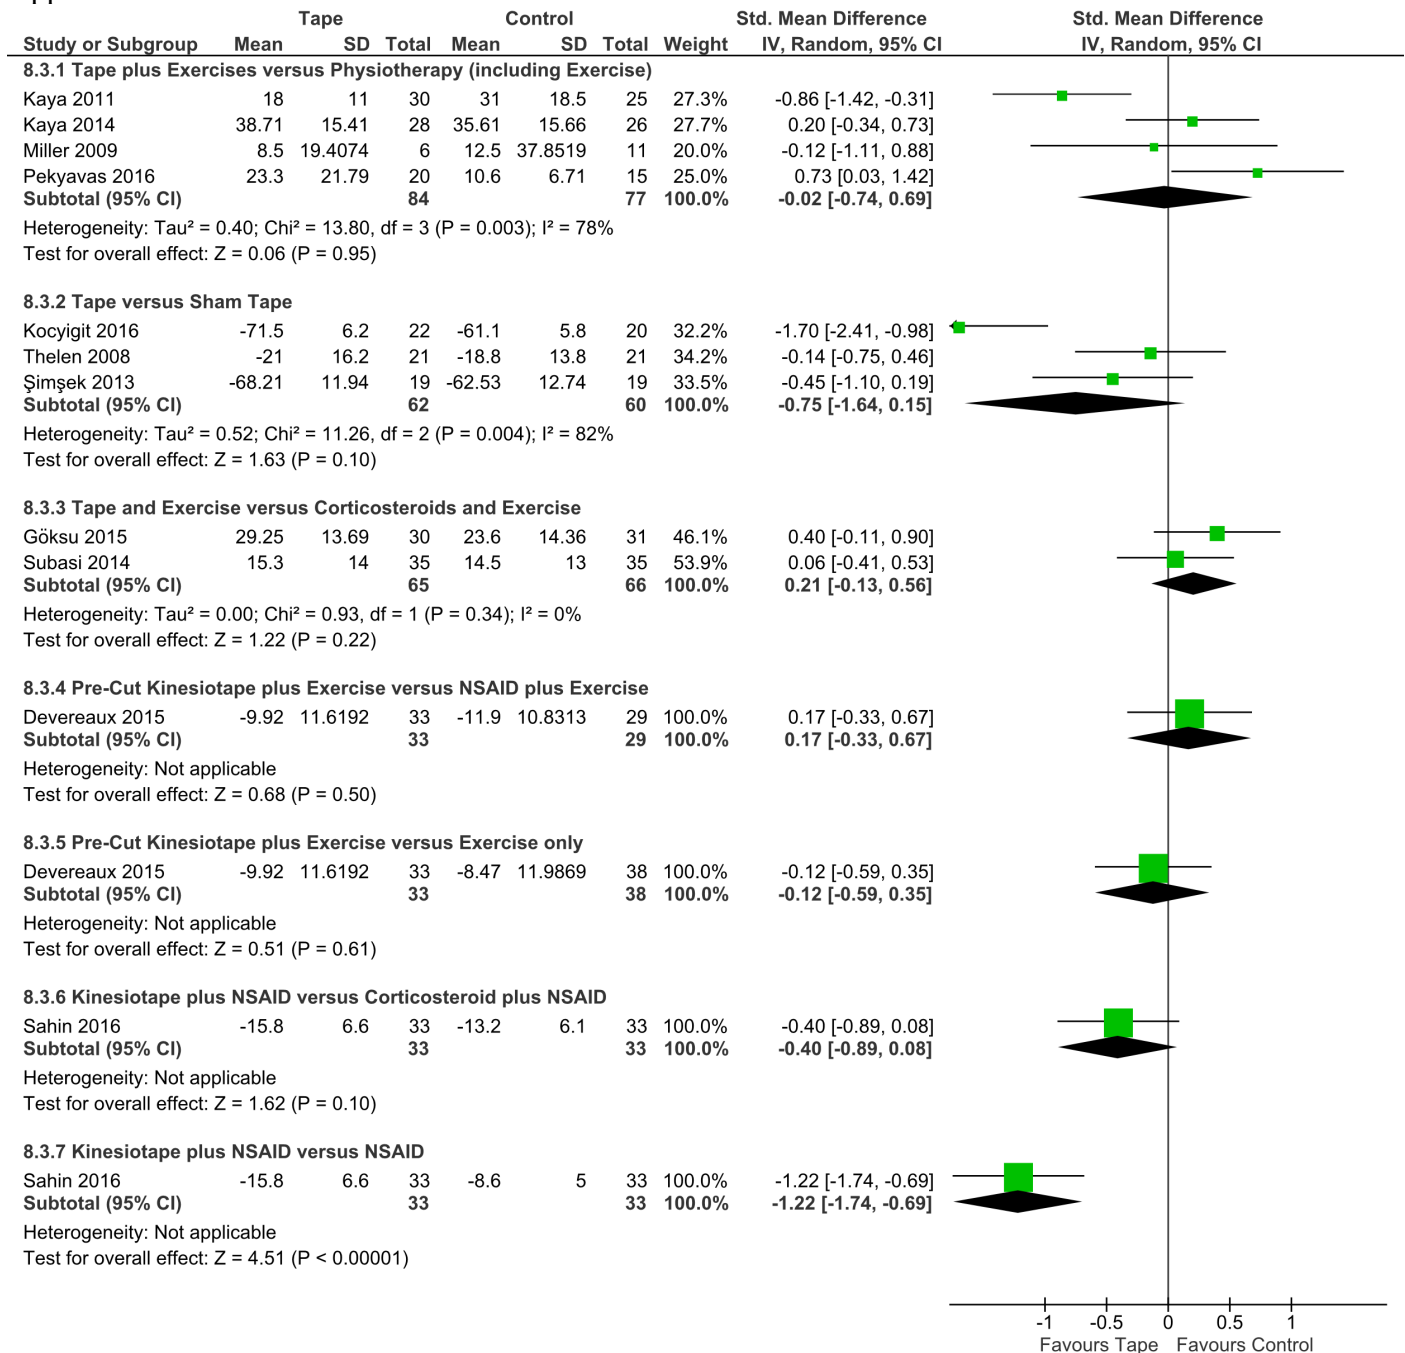

Figure Appendix-4b 15. Tape: Outcome function at the longest follow-up



## Appendix 4b Forest Plots Function

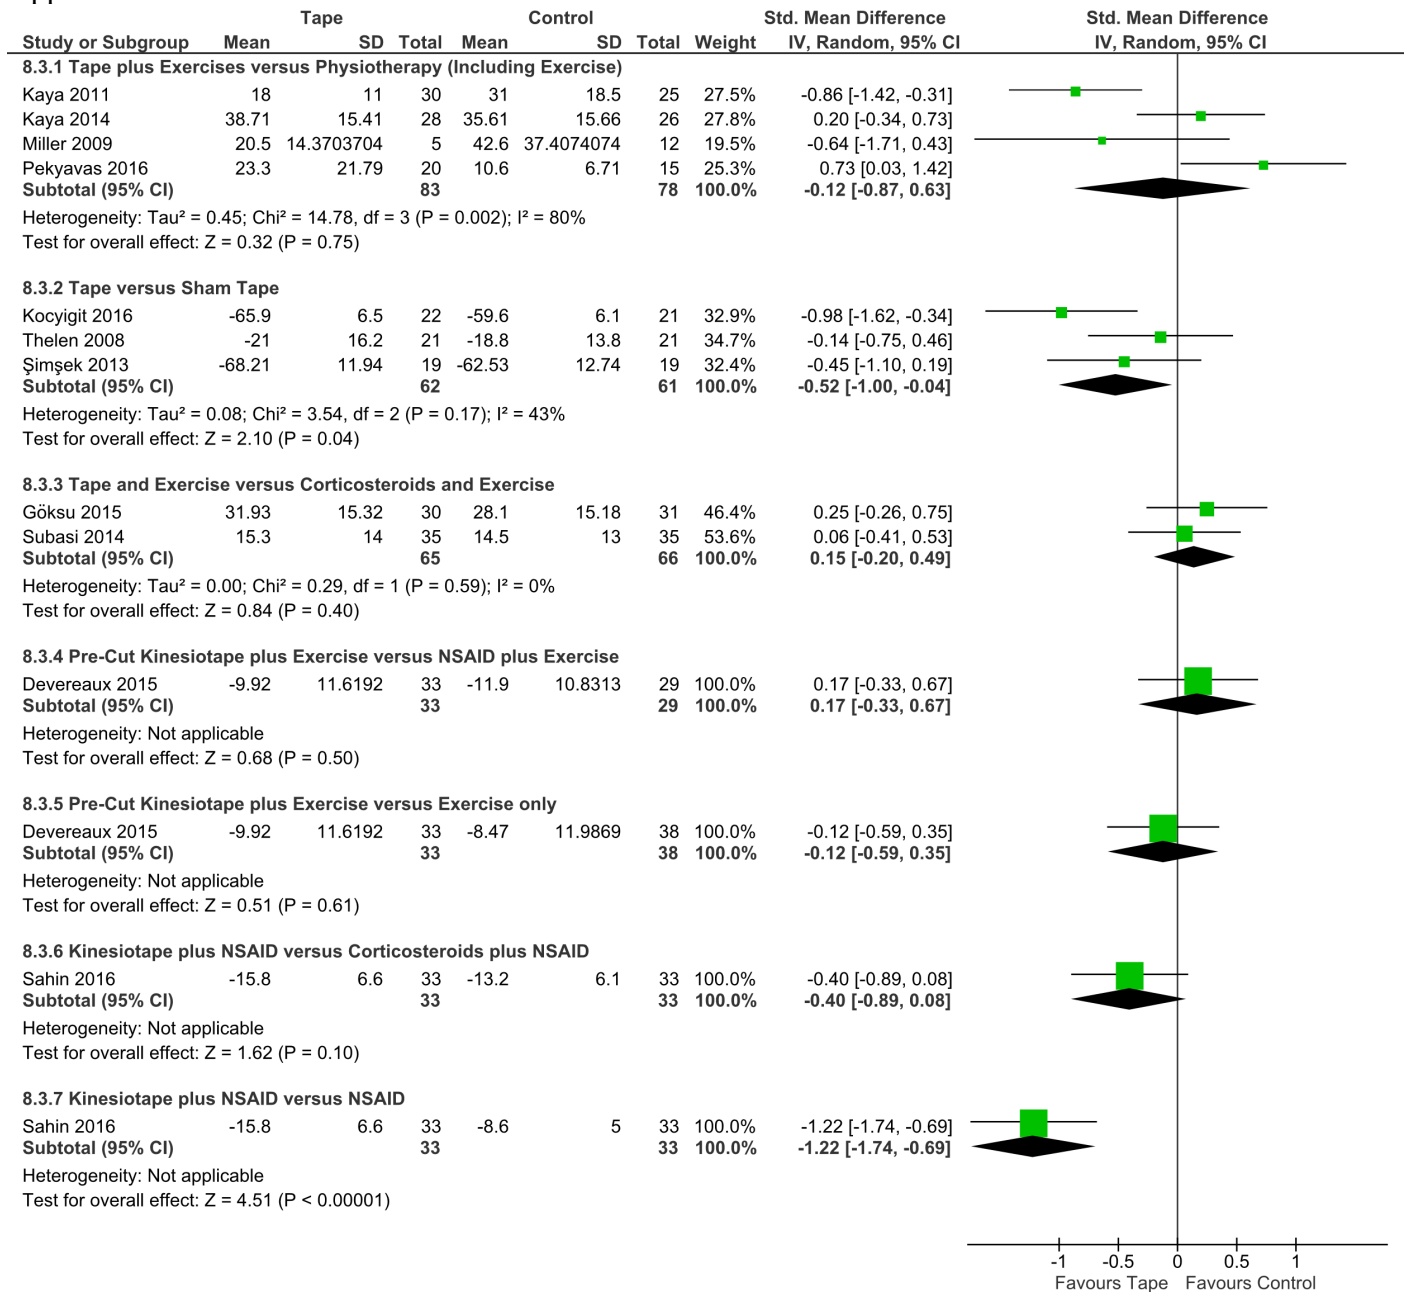

Figure Appendix-4b 16. Tape: Outcome function at the shortest follow-up

## Appendix 4b Forest Plots Function

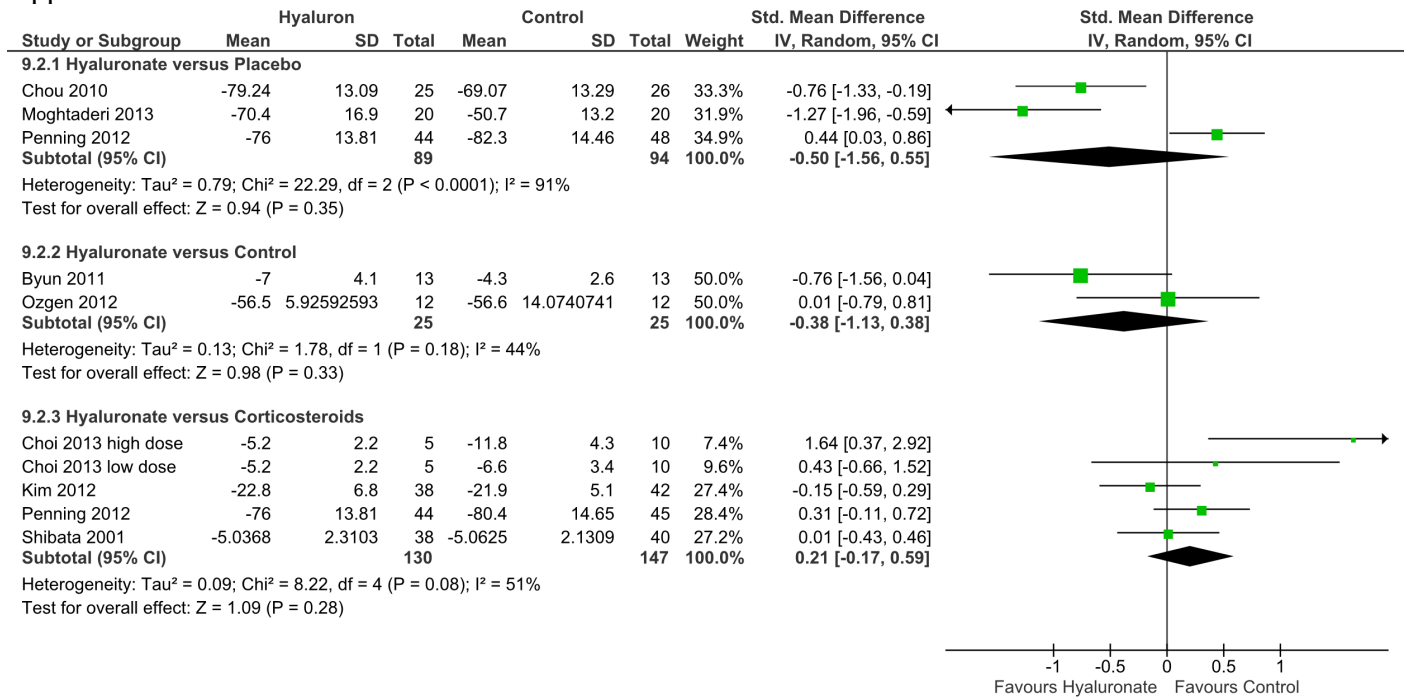

Figure Appendix-4b 17. Hyaluronate: Outcome function at the longest follow-up

## Appendix 4b Forest Plots Function

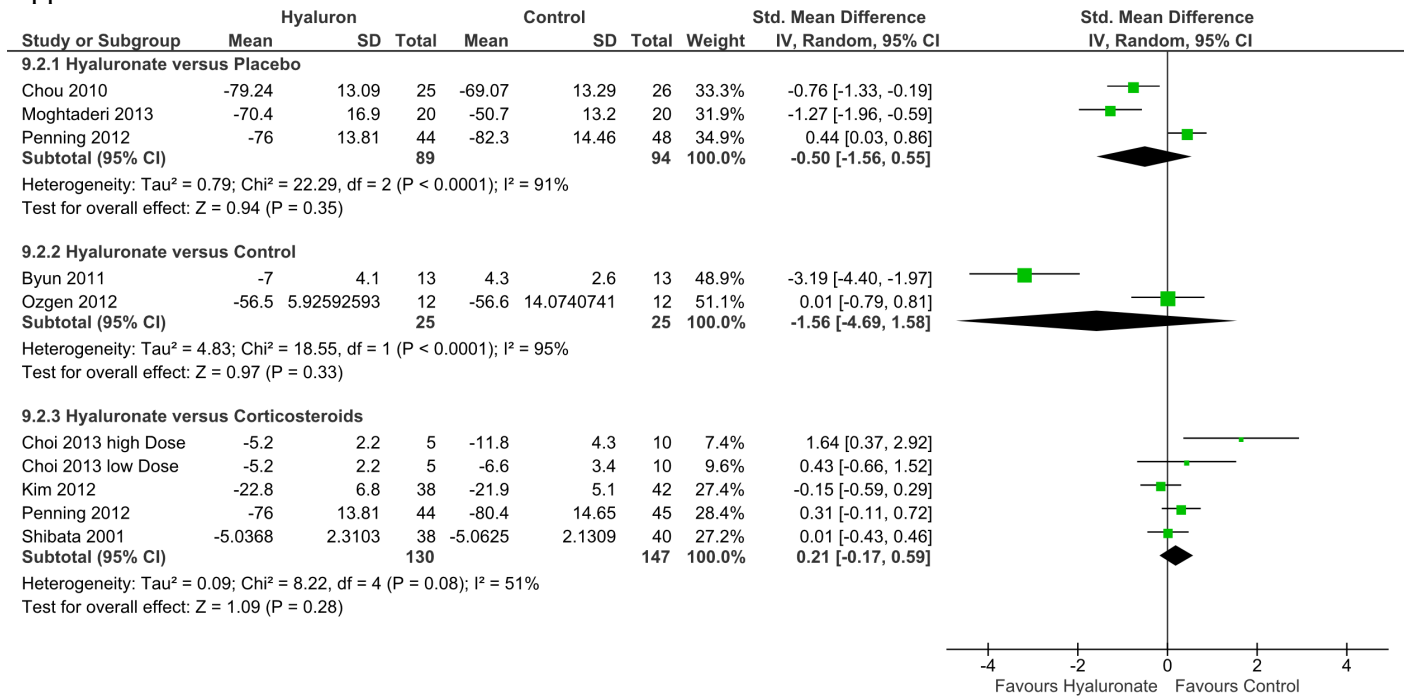

Figure Appendix-4b 18. Hyaluronate: Outcome function at the shortest follow-up

### Appendix 4b Forest Plots Function

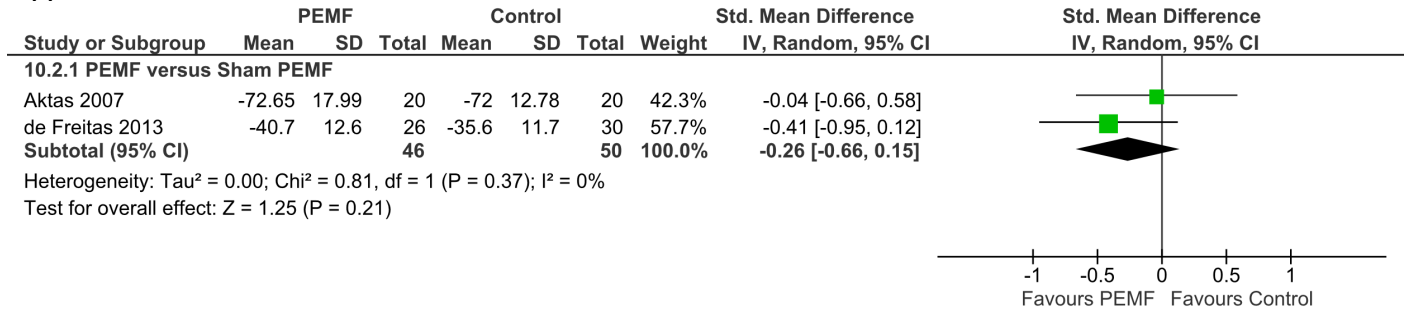

Figure Appendix-4b 19. PEMF: Outcome function at the longest follow-up

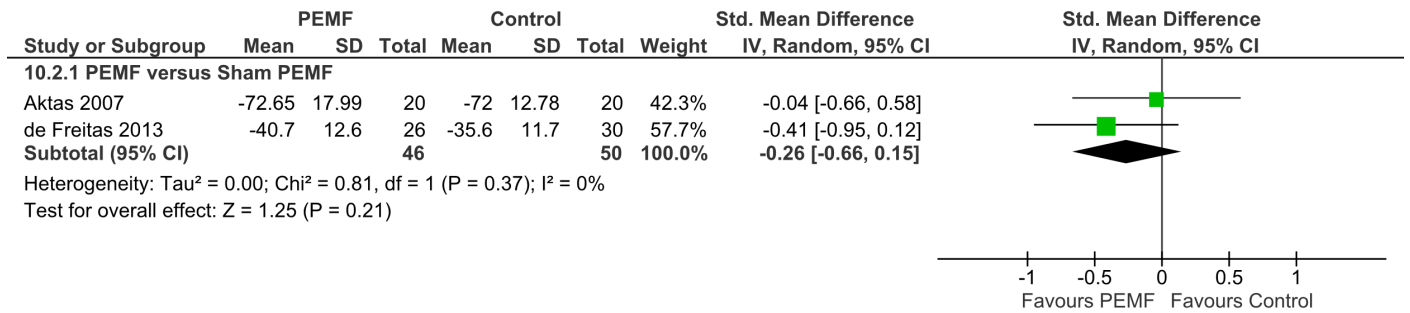

Figure Appendix-4b 20. PEMF: Outcome function at the shortest follow-up

### Appendix 4b Forest Plots Function

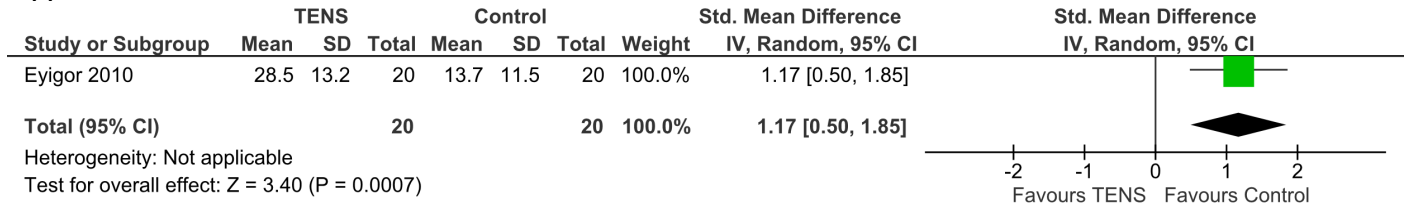

Figure Appendix-4b 21. TENS: Outcome function at the longest follow-up

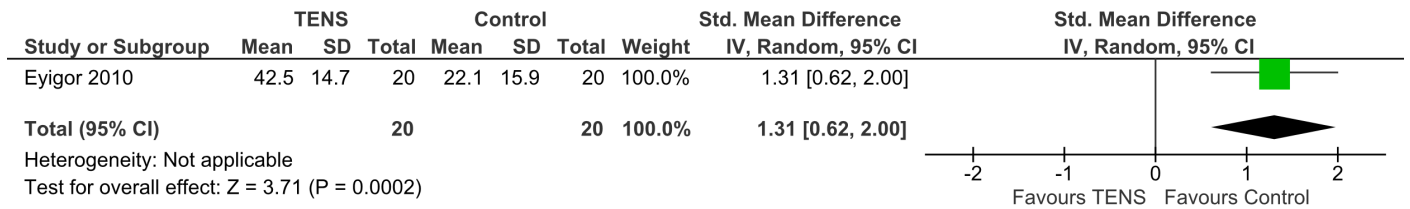

Figure Appendix-4b 22. TENS: Outcome function at the shortest follow-up

## Appendix 4b Forest Plots Function

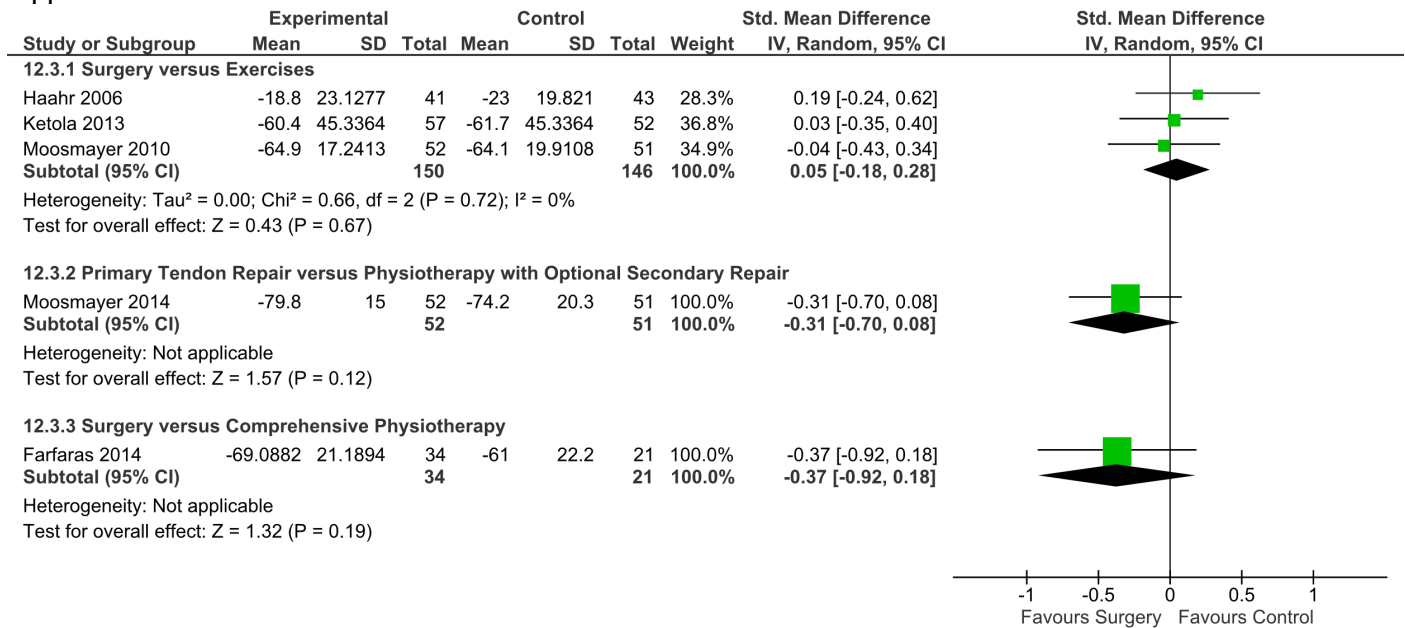

Figure Appendix-4b 23. Surgery: Outcome function at the longest follow-up

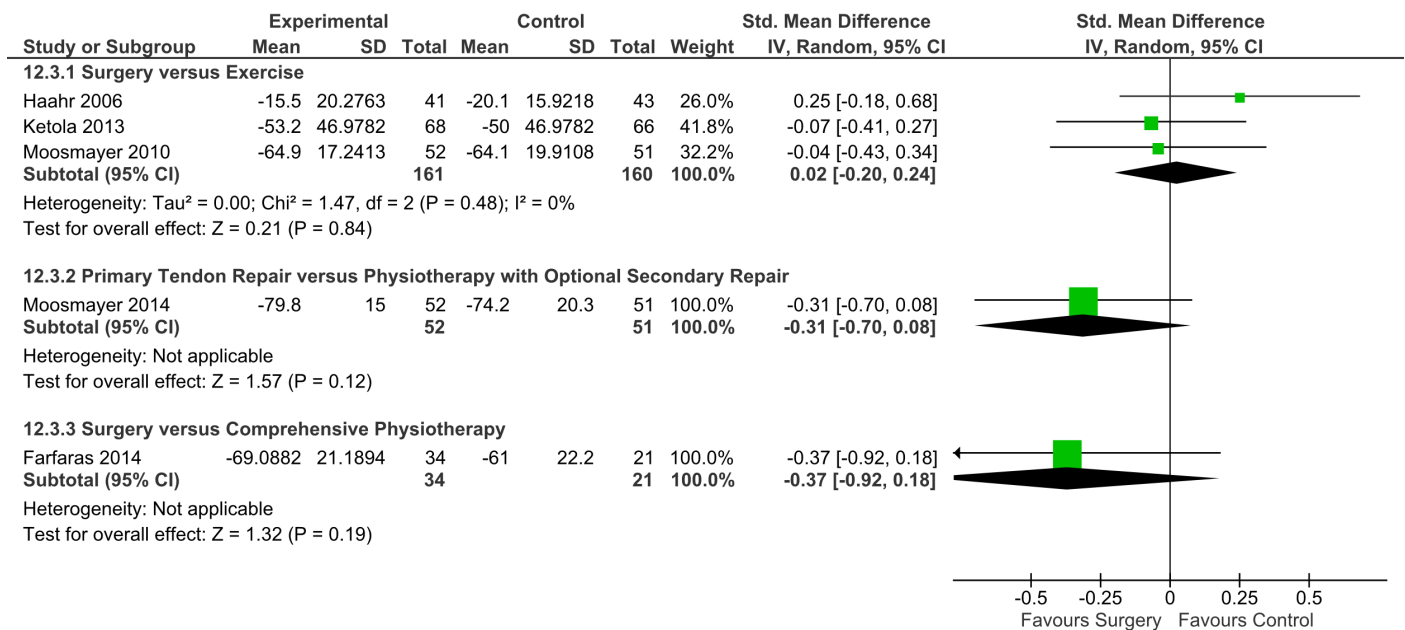

Figure Appendix-4b 24. Surgery: Outcome function at the shortest follow-up

### Appendix 4b Forest Plots Function

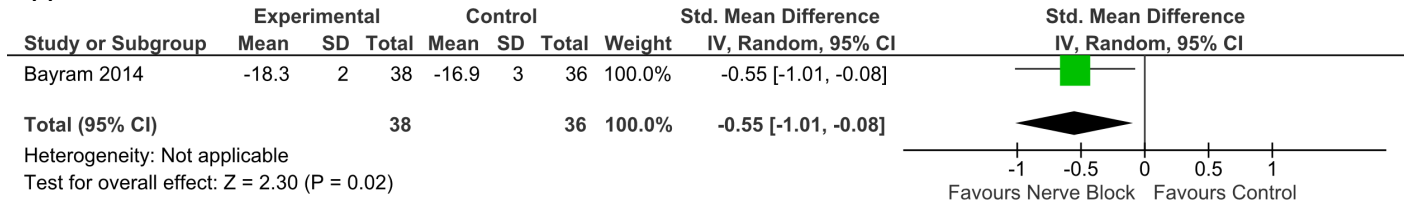

Figure Appendix-4b 25. Nerve block: Outcome function at the longest follow-up

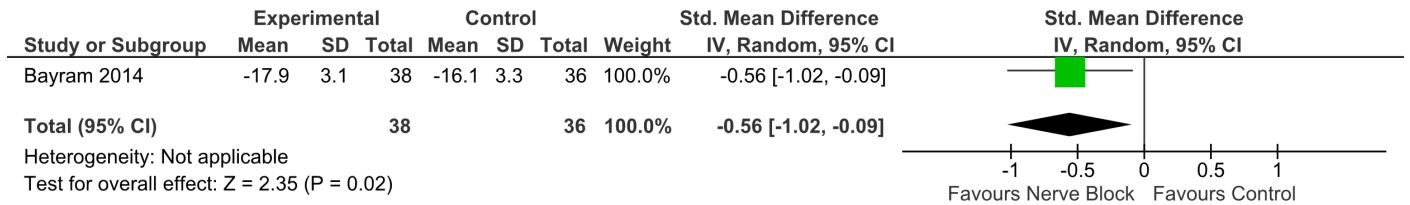

Figure Appendix-4b 26. Nerve block: Outcome function at the shortest follow-up

## Appendix 4b Forest Plots Function

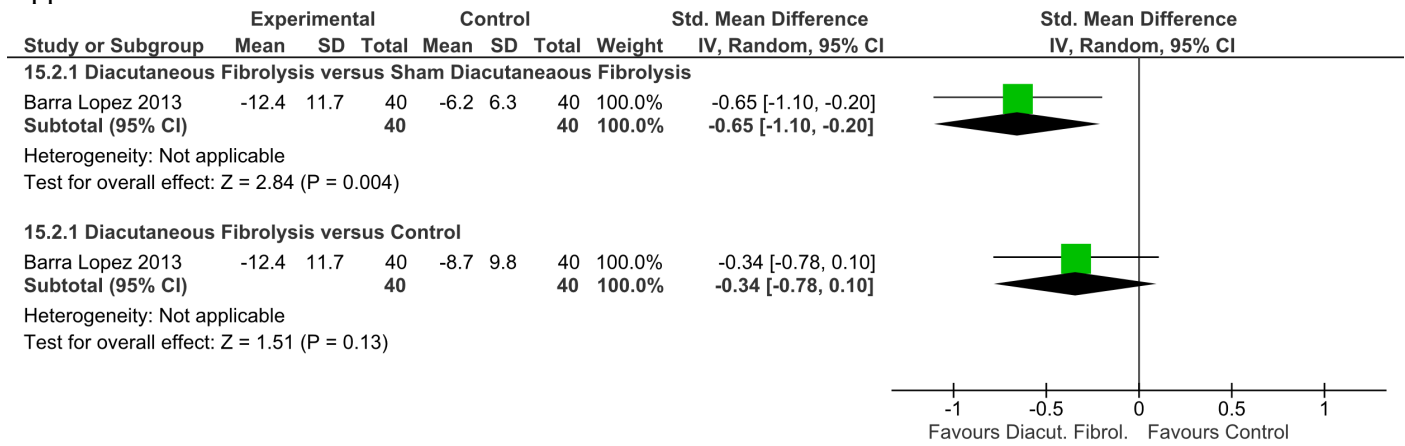

Figure Appendix-4b 27. Diacutaneous Fibrolysis: Outcome function at the longest follow-up

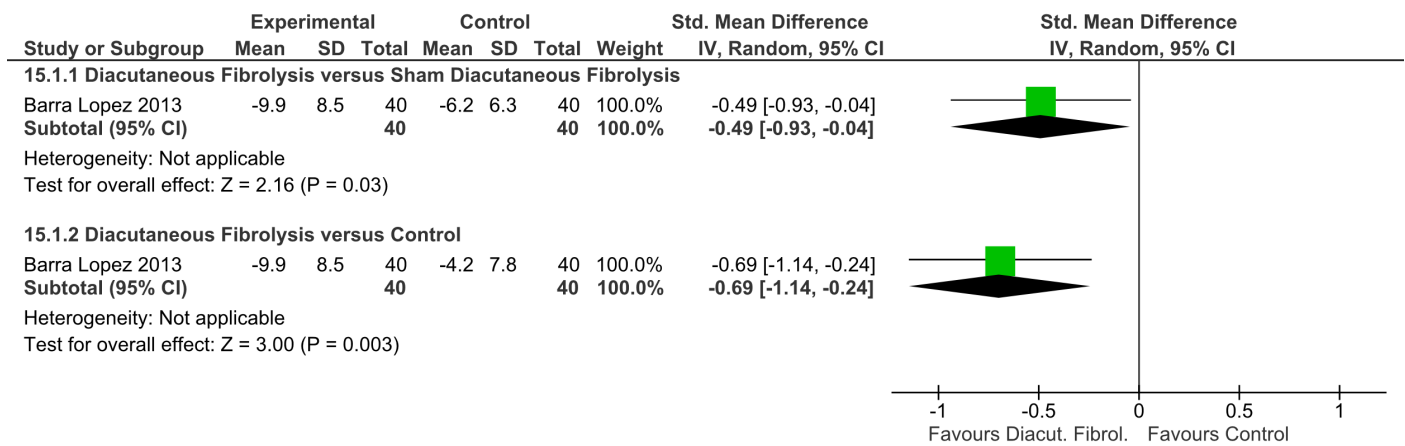

Figure Appendix-4b 28. Diacutaneous Fibrolysis: Outcome function at the shortest follow-up



## Appendix 4b Forest Plots Function

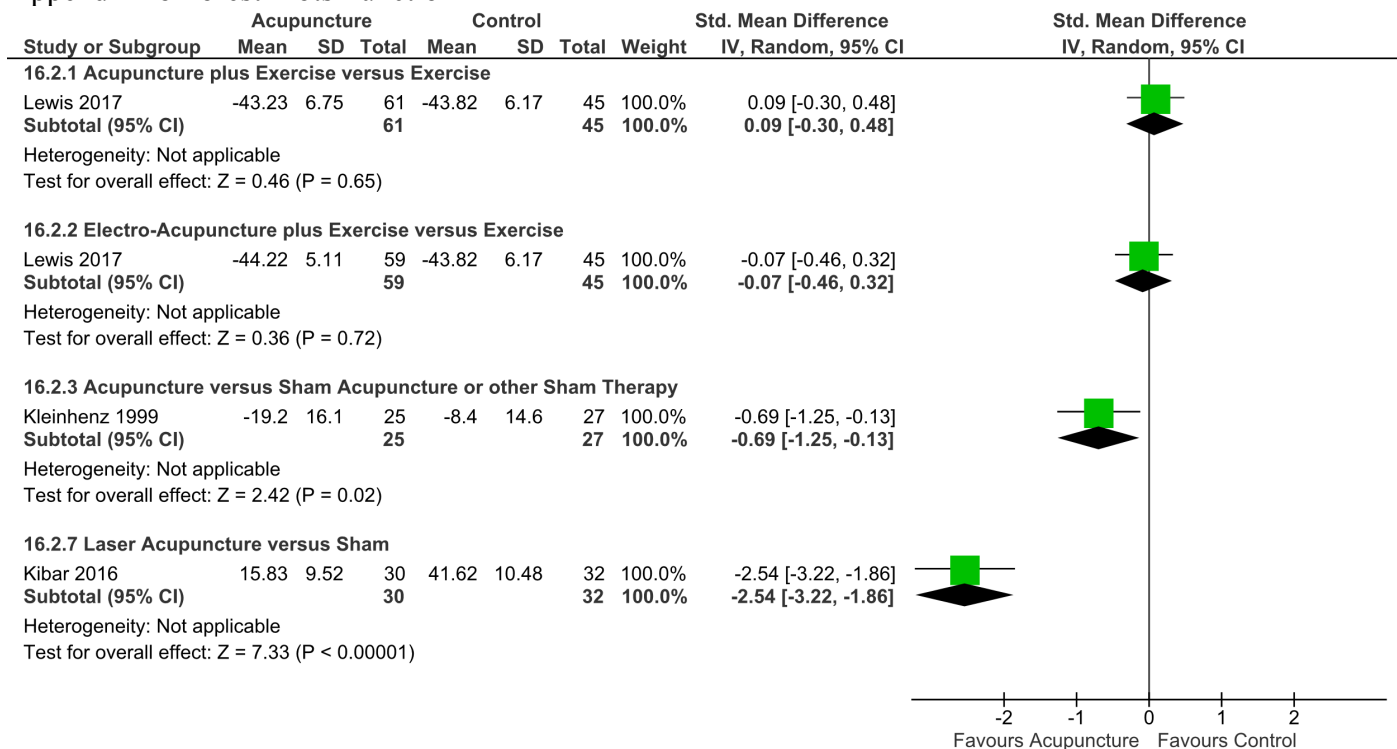

Figure Appendix-4b 29. Acupuncture: Outcome function at the longest follow-up

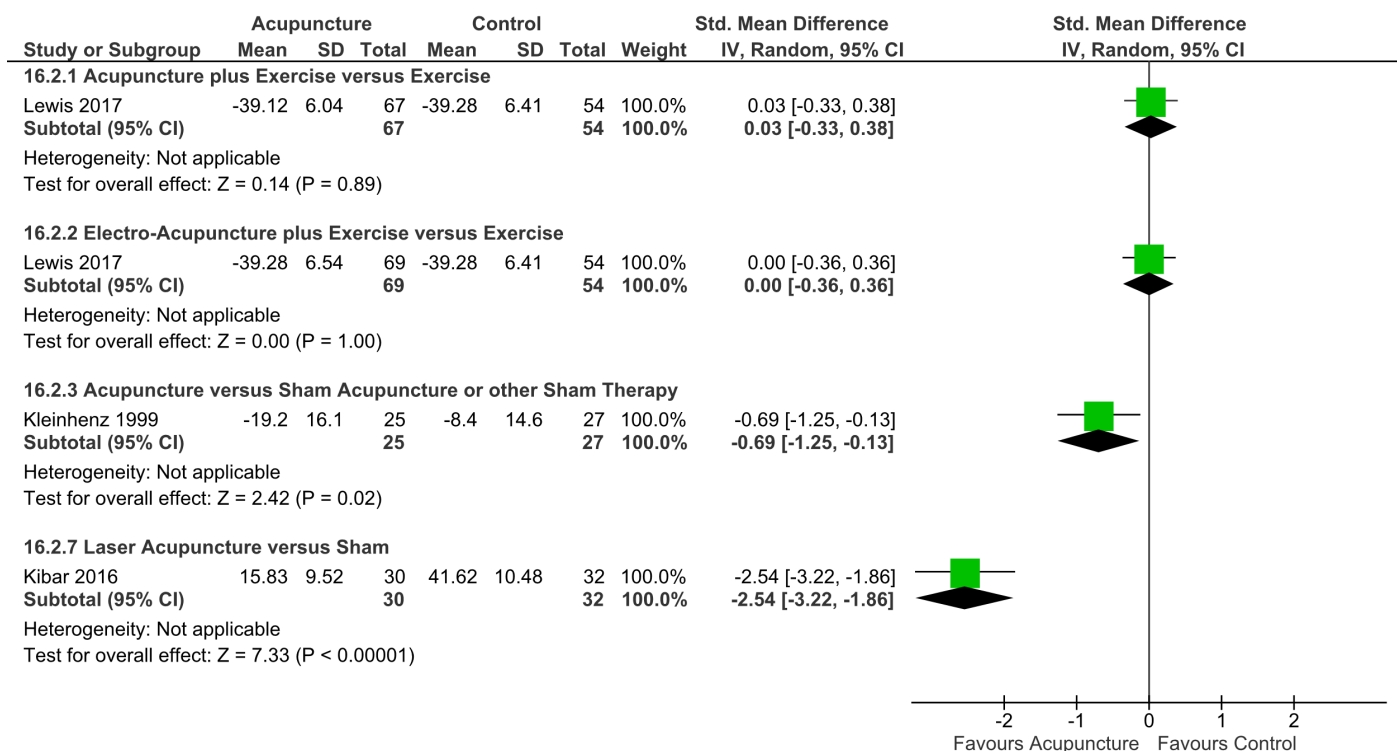

Figure Appendix-4b 30. Acupuncture: Outcome function at the shortest follow-up

### Appendix 4b Forest Plots Function

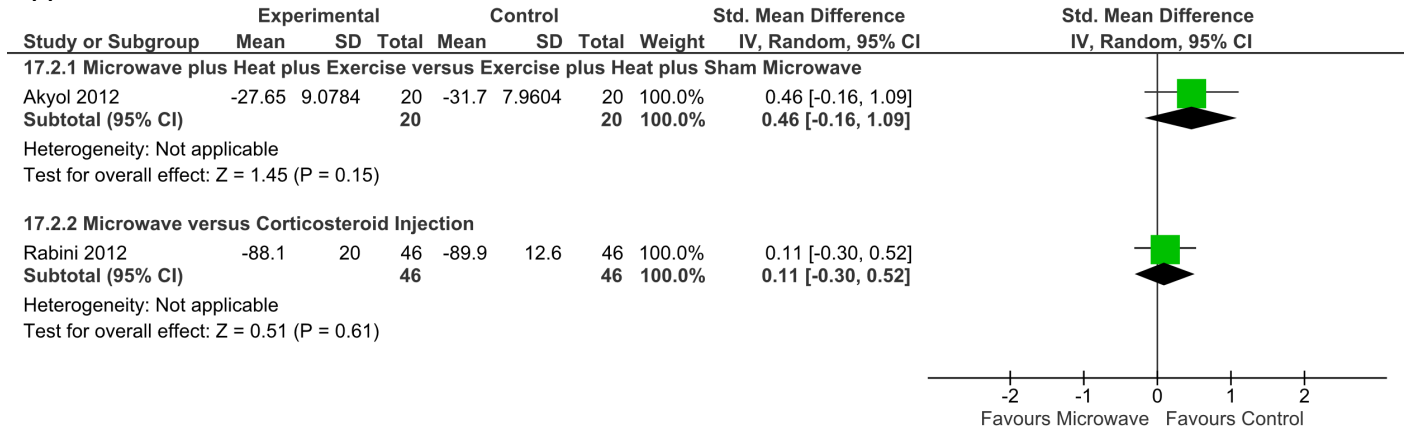

Figure Appendix-4b 31. Microwave: Outcome function at the longest follow-up

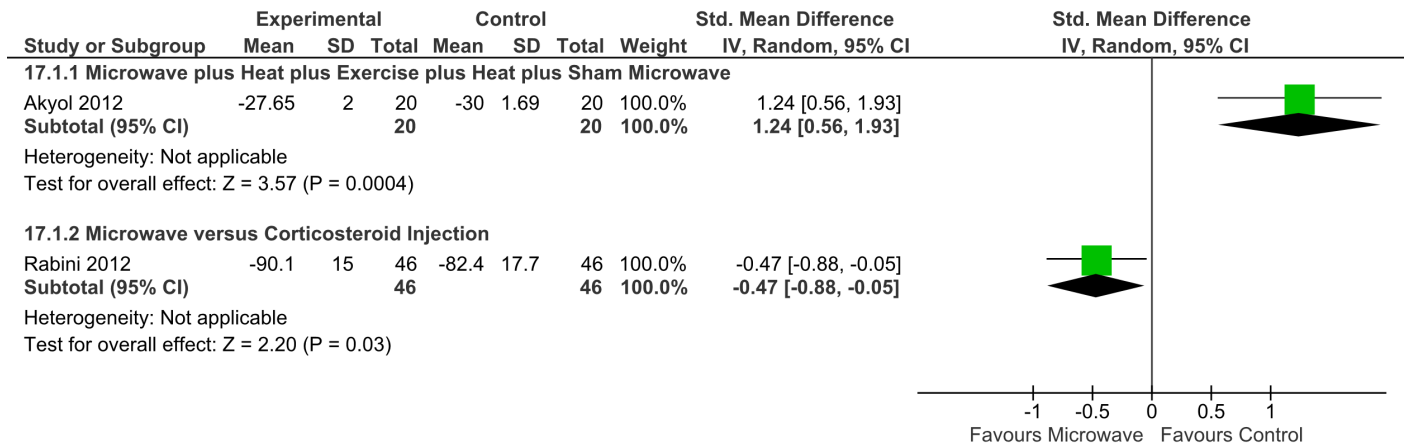

Figure Appendix-4b 32. Microwave: Outcome function at the shortest follow-up

## Appendix 4b Forest Plots Function

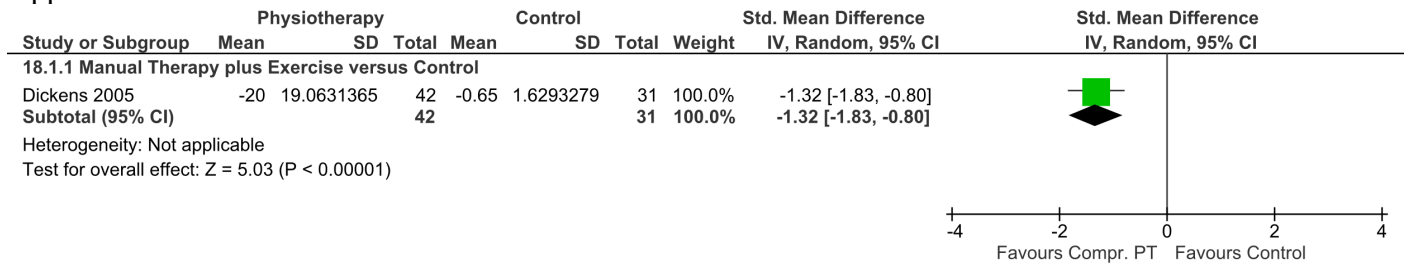

Figure Appendix-4b 33. Comprehensive physiotherapy: Outcome function at the longest follow-up

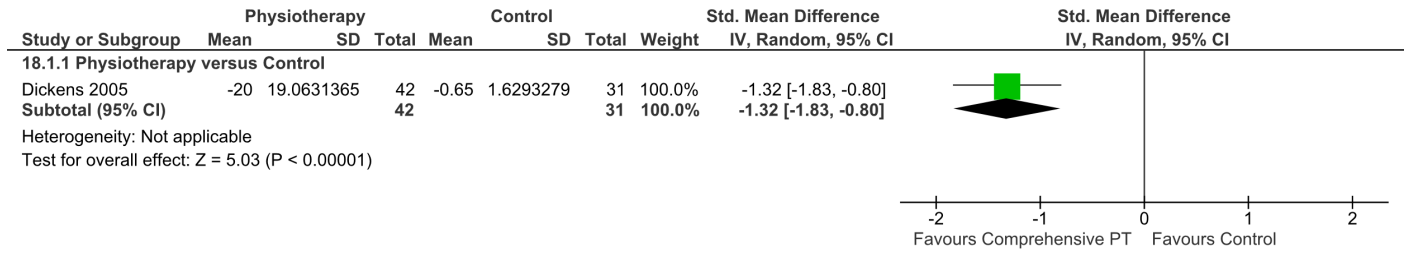

Figure Appendix-4b 34. Comprehensive physiotherapy: Outcome function at the shortest follow-up

## Appendix 4b Forest Plots Function

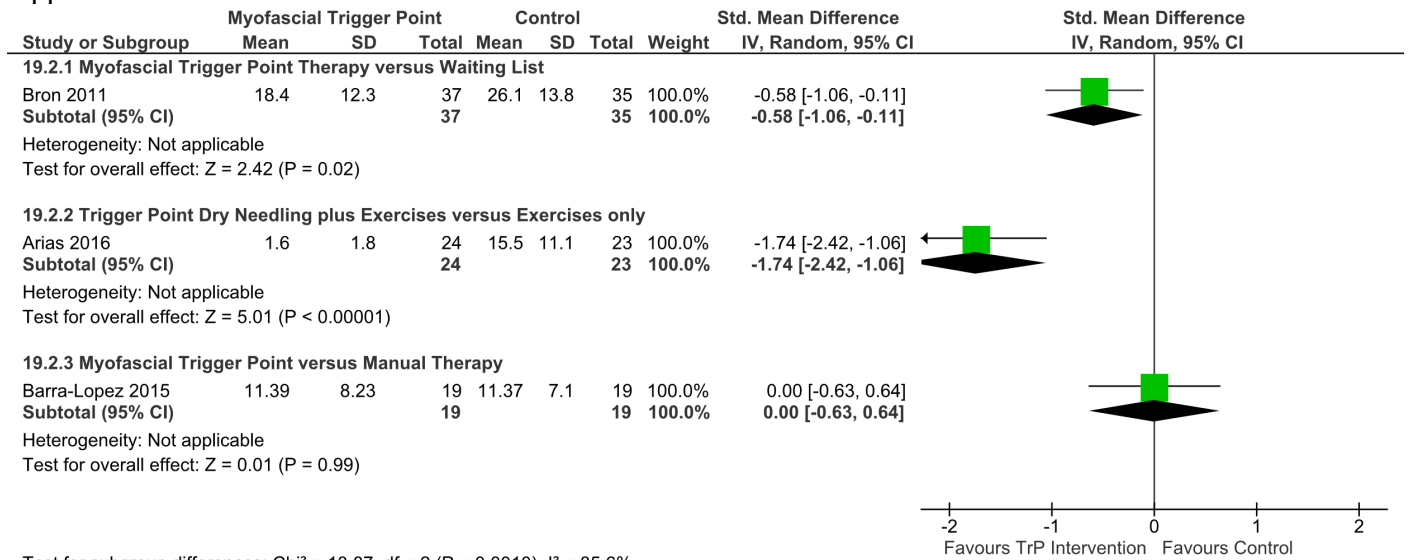

Figure Appendix-4b 35. Myofascial Trigger: Outcome function at the longest follow-up

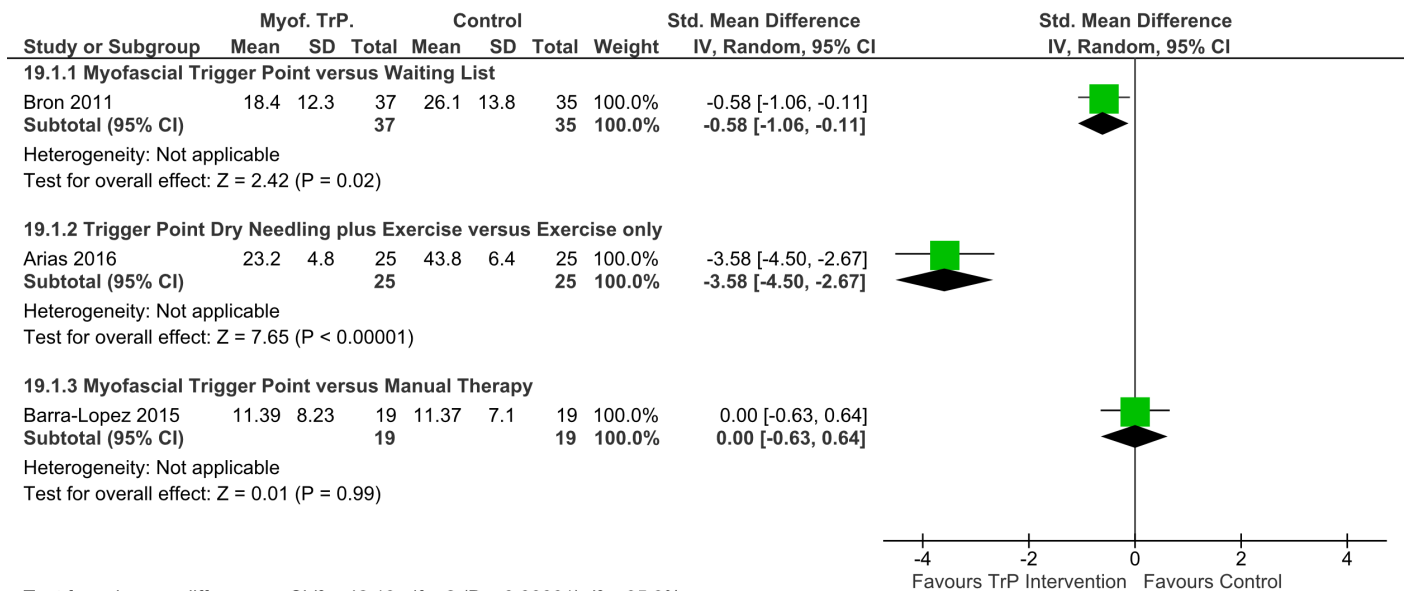

Figure Appendix-4b 36. Myofascial Trigger: Outcome function at the shortest follow-up

## Appendix 4b Forest Plots Function

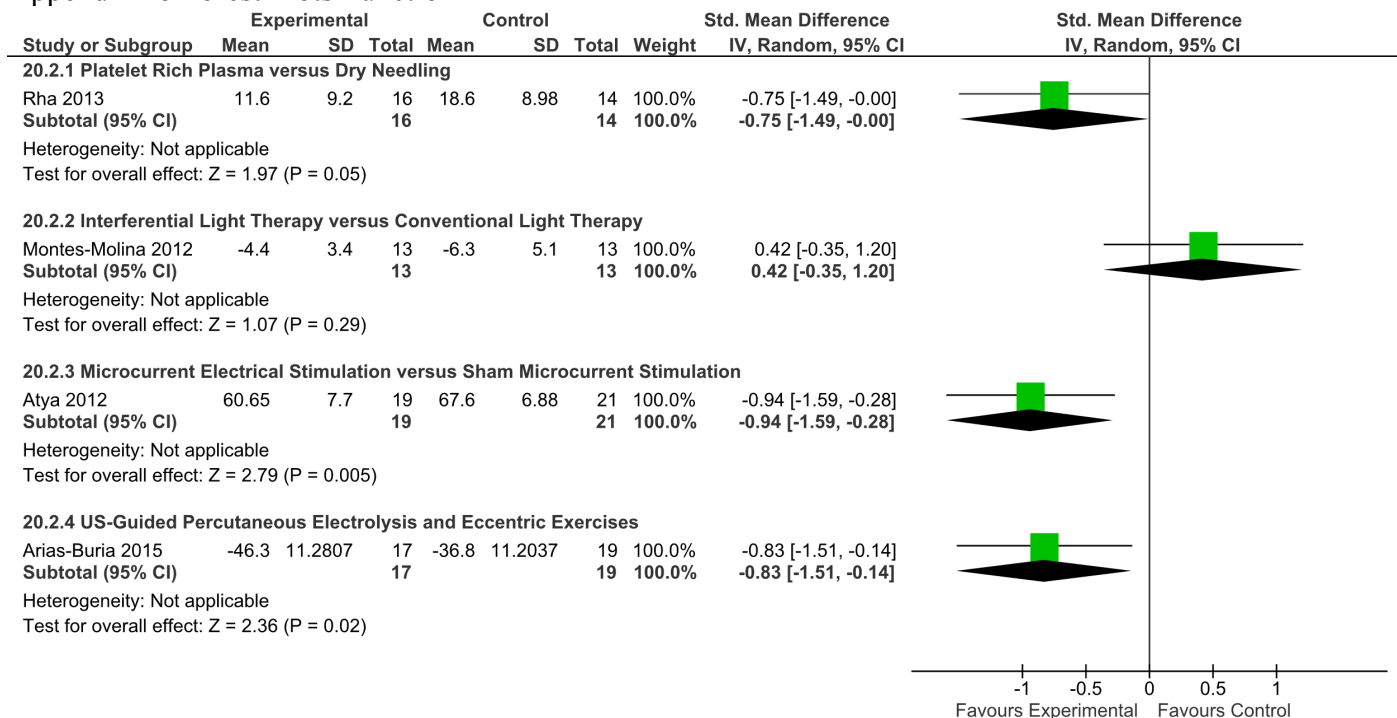

Figure Appendix-4b 37. Miscellaneous interventions: Outcome function at the longest follow-up

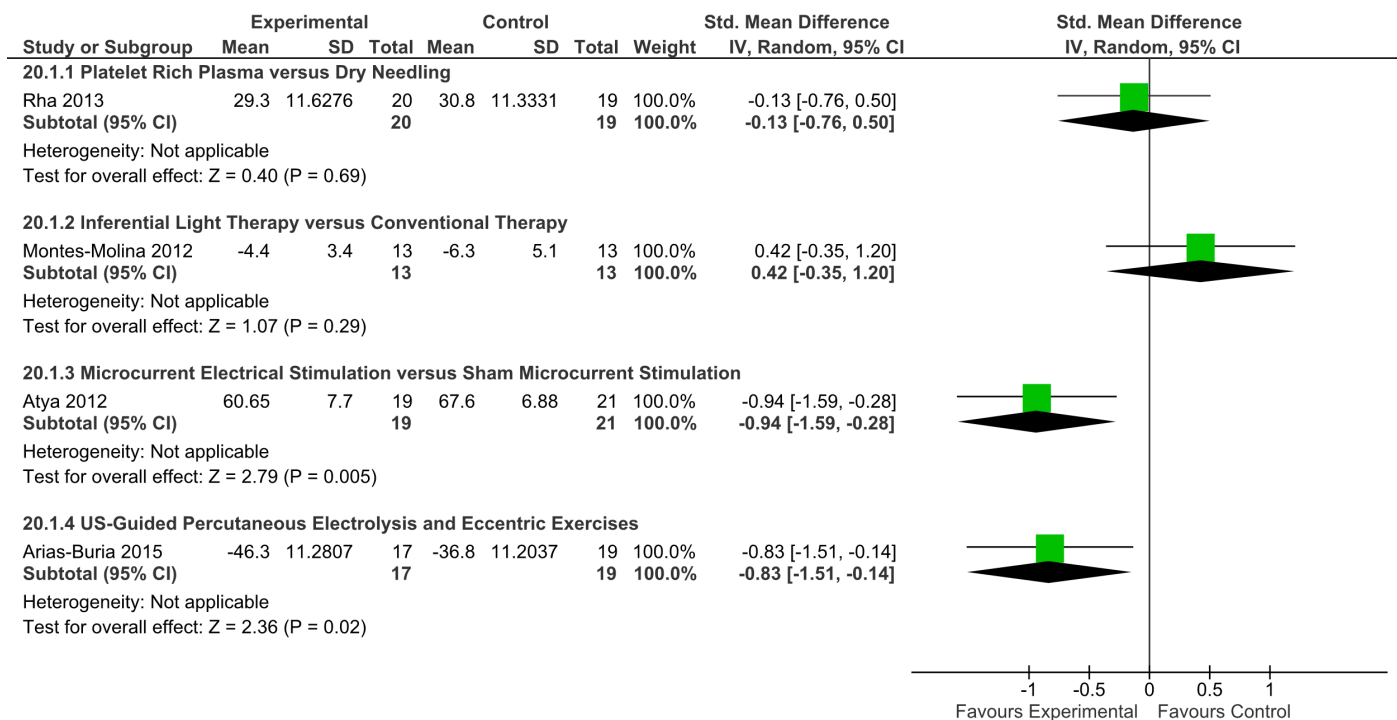

Figure Appendix-4b 39. Miscellaneous interventions: Outcome function at the longest follow-up
