# Supplementary material
Source: HighWire-hosted journal article supplement (https://bjsm.bmj.com/content/bjsports-2016-096515)
Supplement: inline-supplementary-material-7 [file inline-supplementary-material-7.pdf]

## Appendix 4c Forest Plots Active Range of Motion

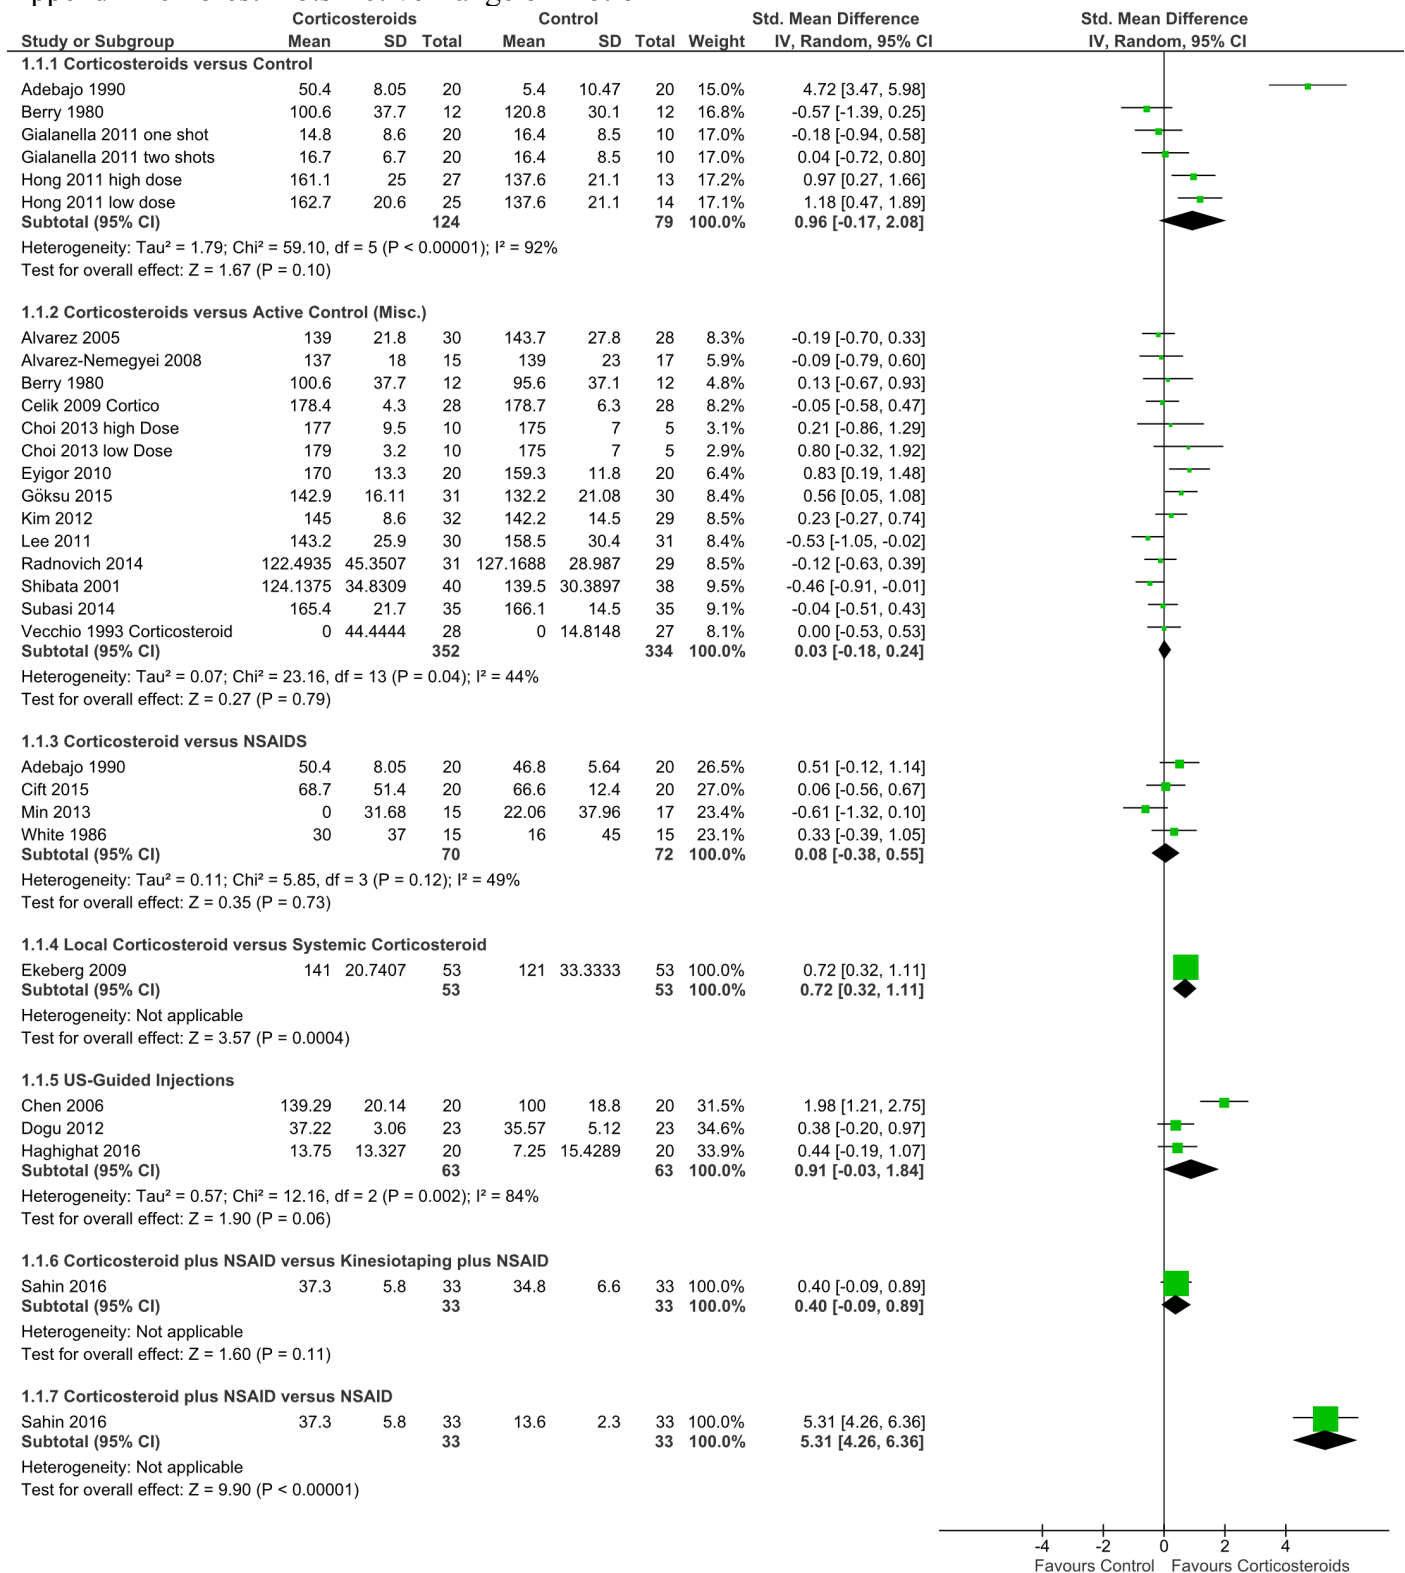

Figure Appendix-4c 1. Steroids: Outcome AROM at the longest follow-up

## Appendix 4c Forest Plots Active Range of Motion

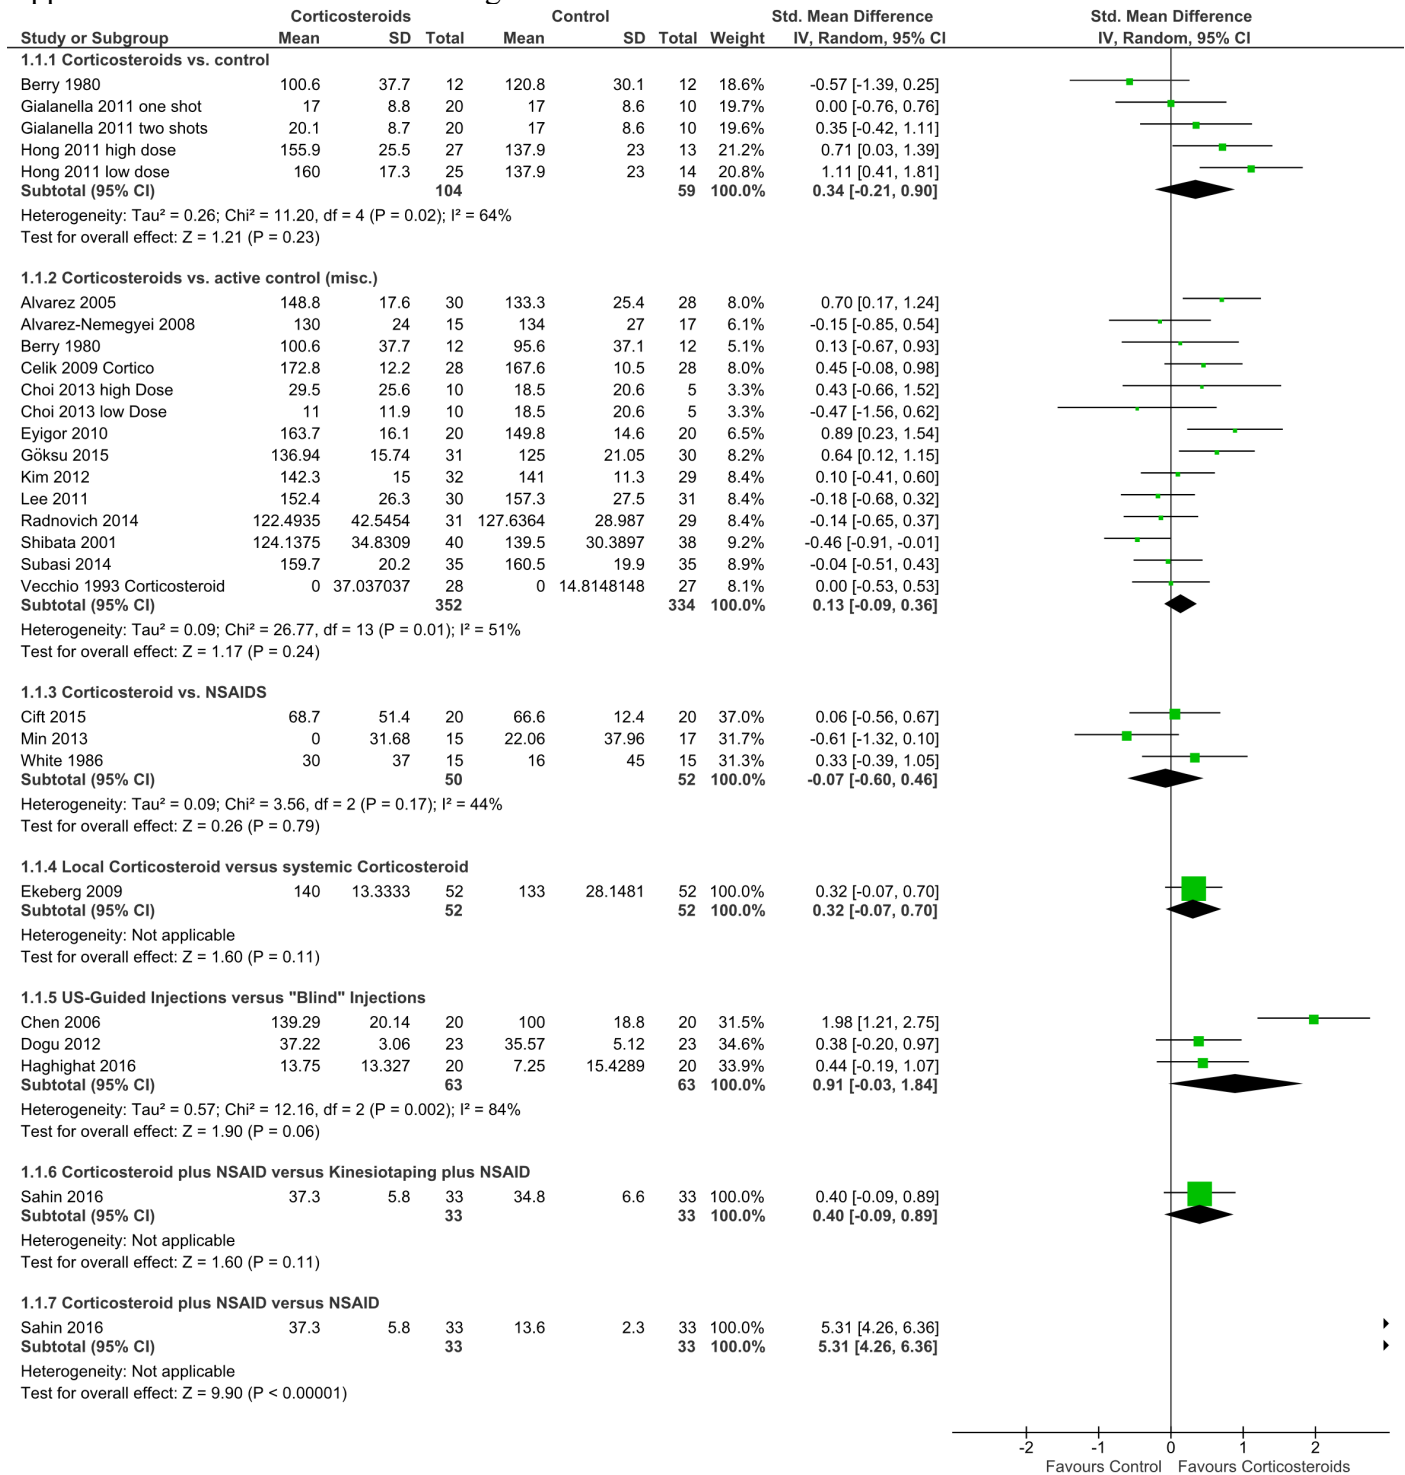

Figure Appendix-4c 2. Steroids: Outcome AROM at the shortest follow-up

## Appendix 4c Forest Plots Active Range of Motion

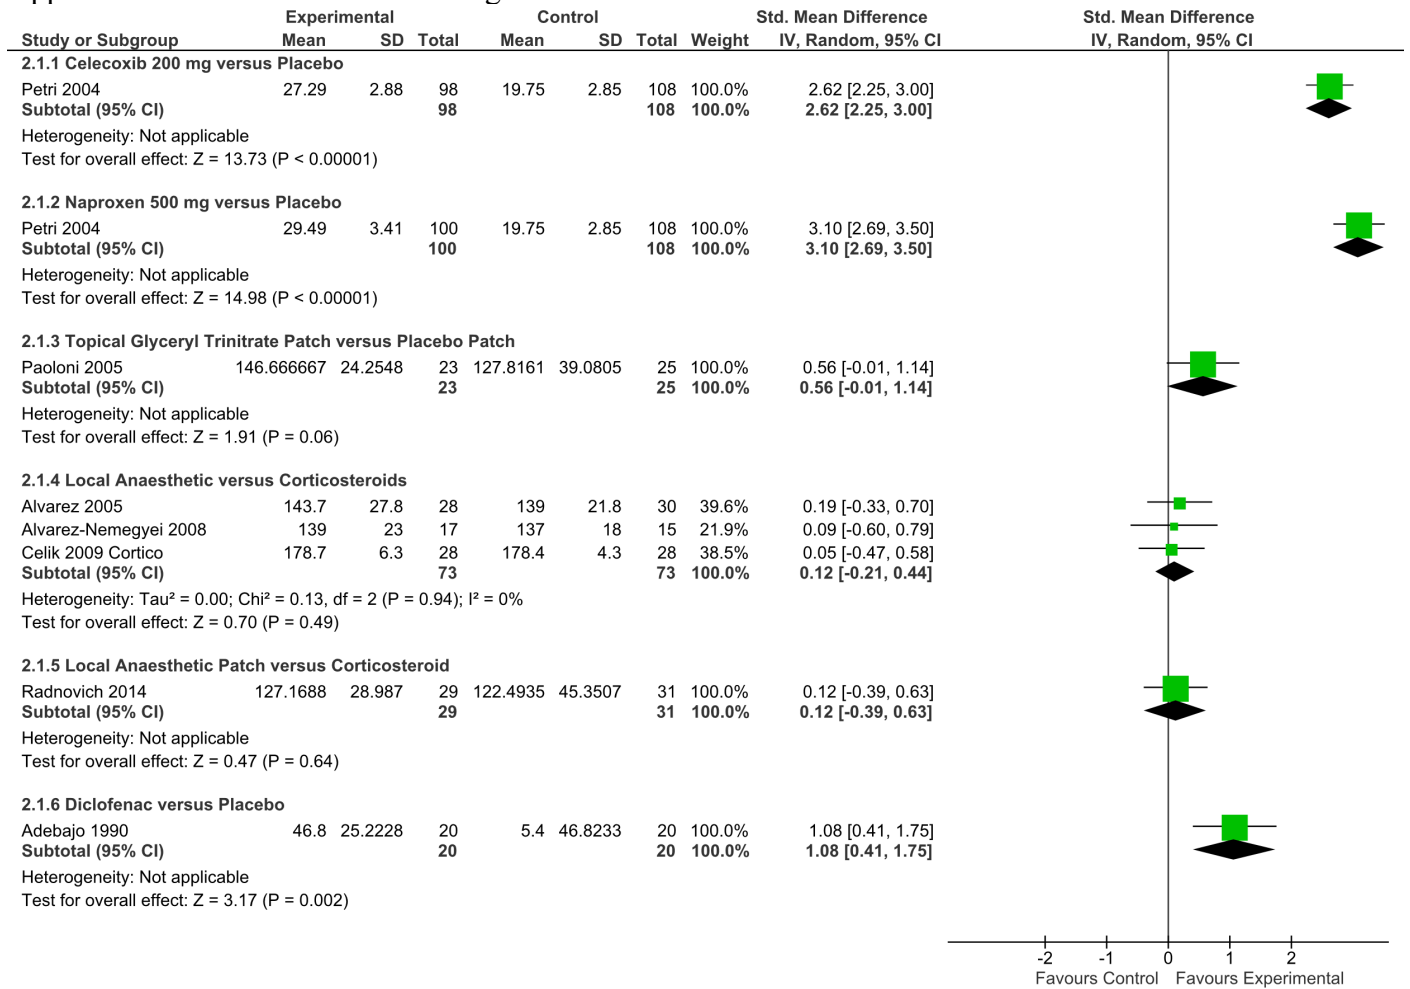

Figure Appendix-4c 3. Medications, and anaesthetic patch: Outcome AROM at the longest follow-up

## Appendix 4c Forest Plots Active Range of Motion

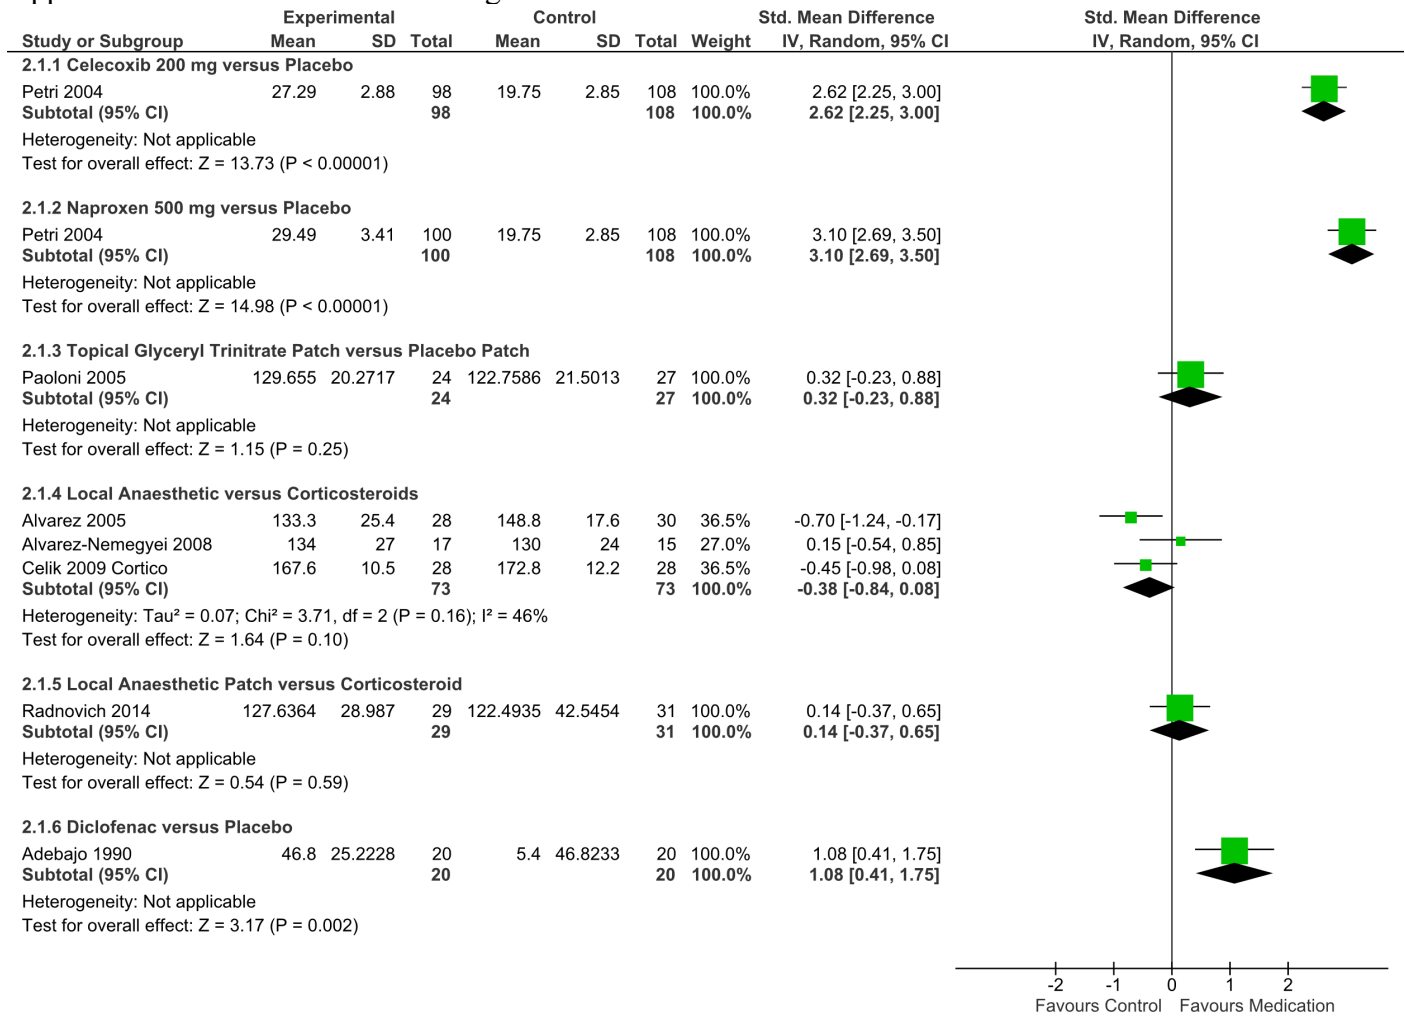

Figure Appendix-4c 4. Medications, and anaesthetic patch: Outcome AROM at the shortest follow-up



## Appendix 4c Forest Plots Active Range of Motion

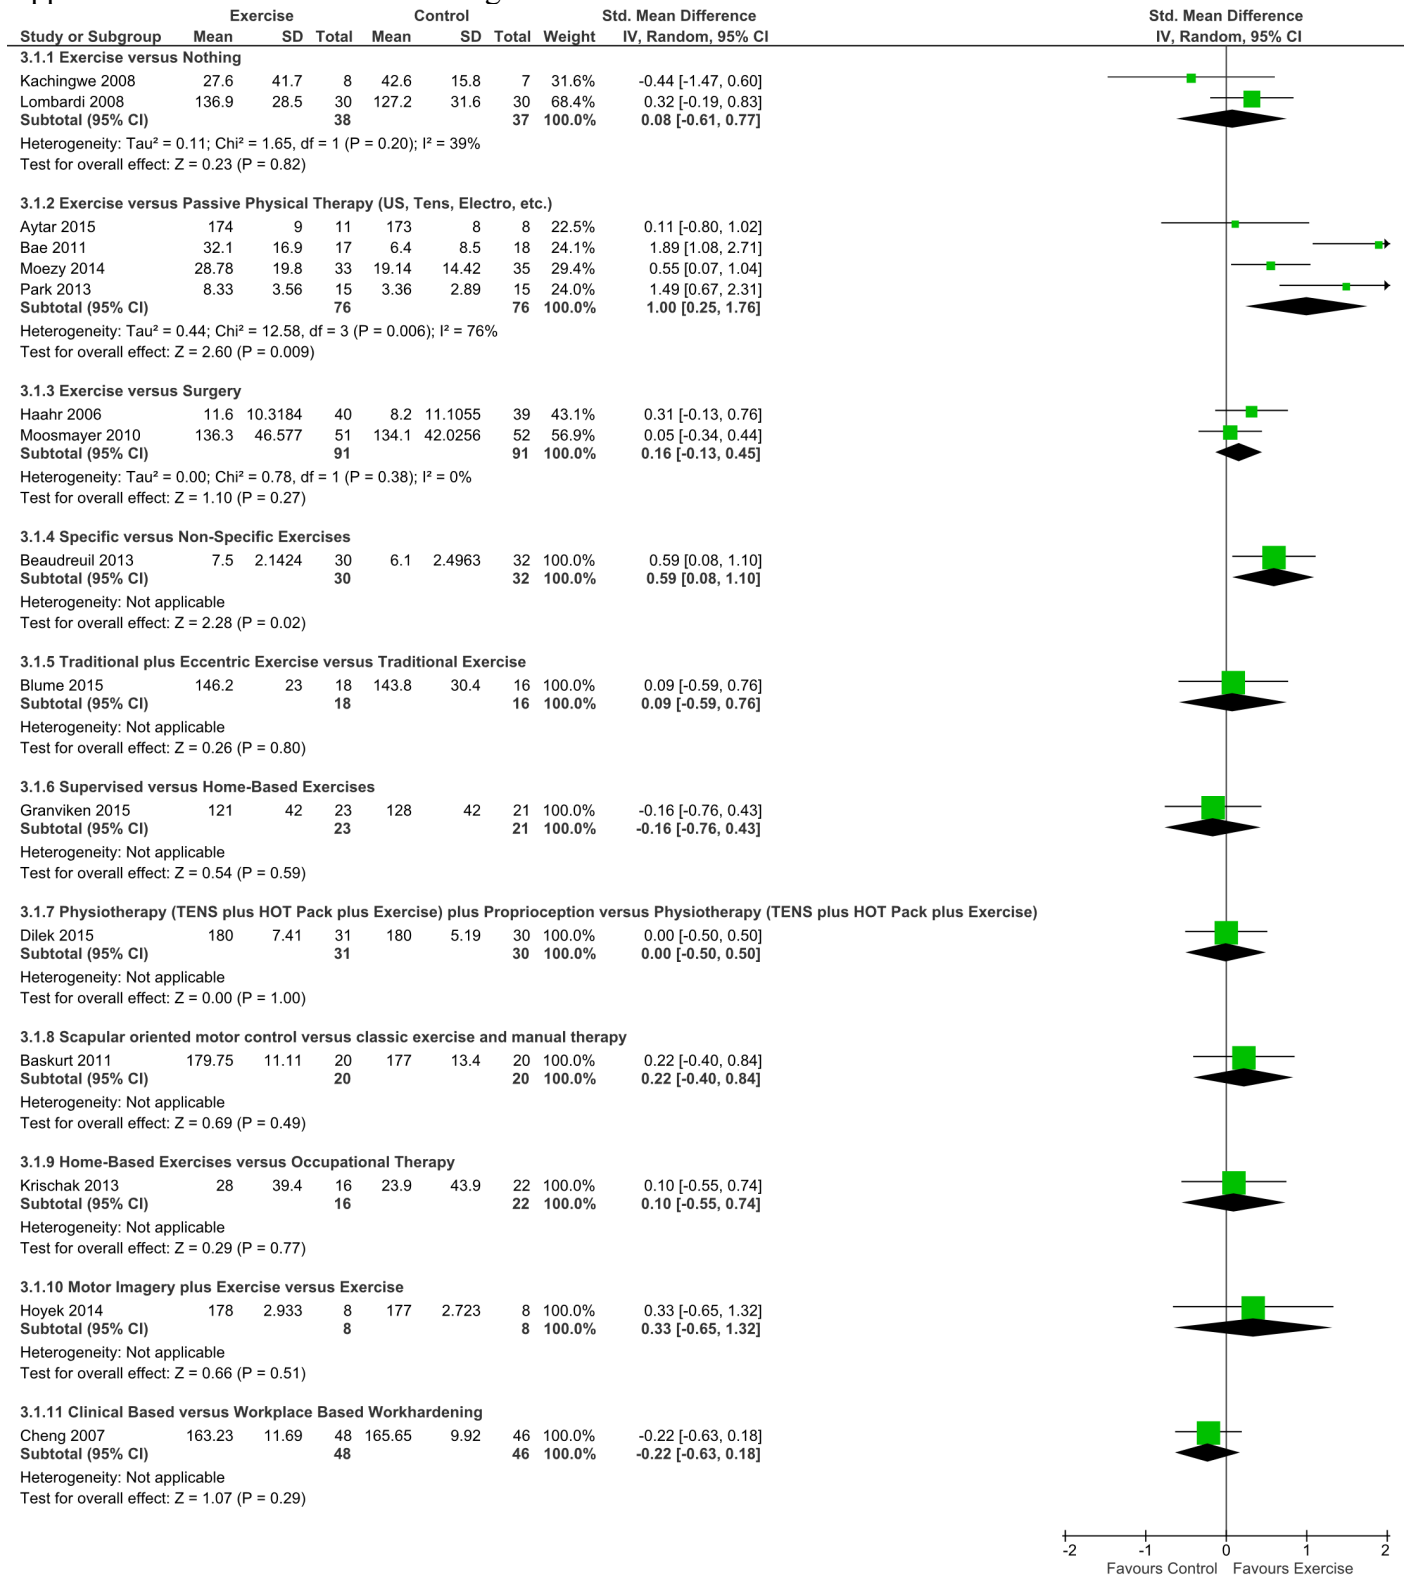

Figure Appendix-4c 5. Exercise: Outcome AROM at the longest follow-up

## Appendix 4c Forest Plots Active Range of Motion

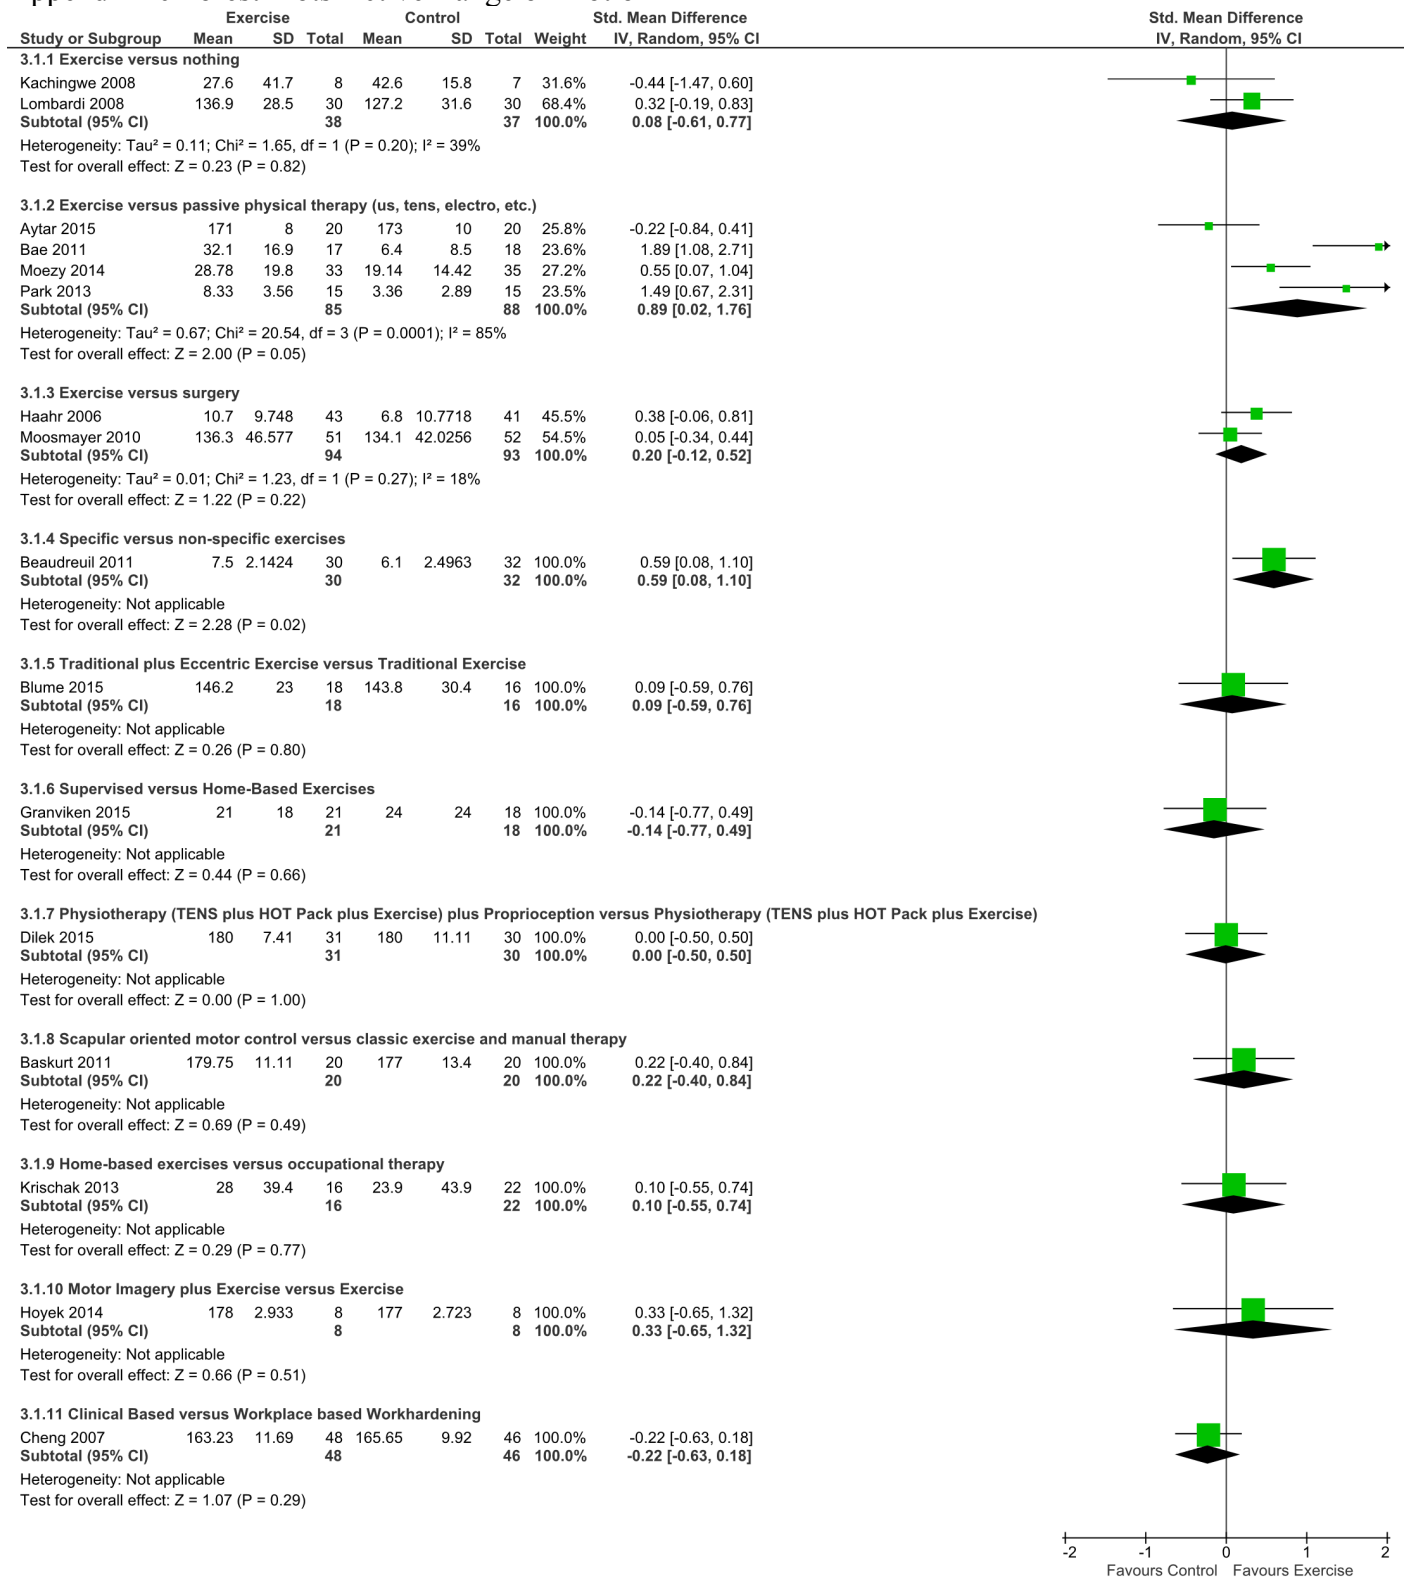

Figure Appendix-4c 6. Exercise: Outcome AROM at the shortest follow-up

## Appendix 4c Forest Plots Active Range of Motion

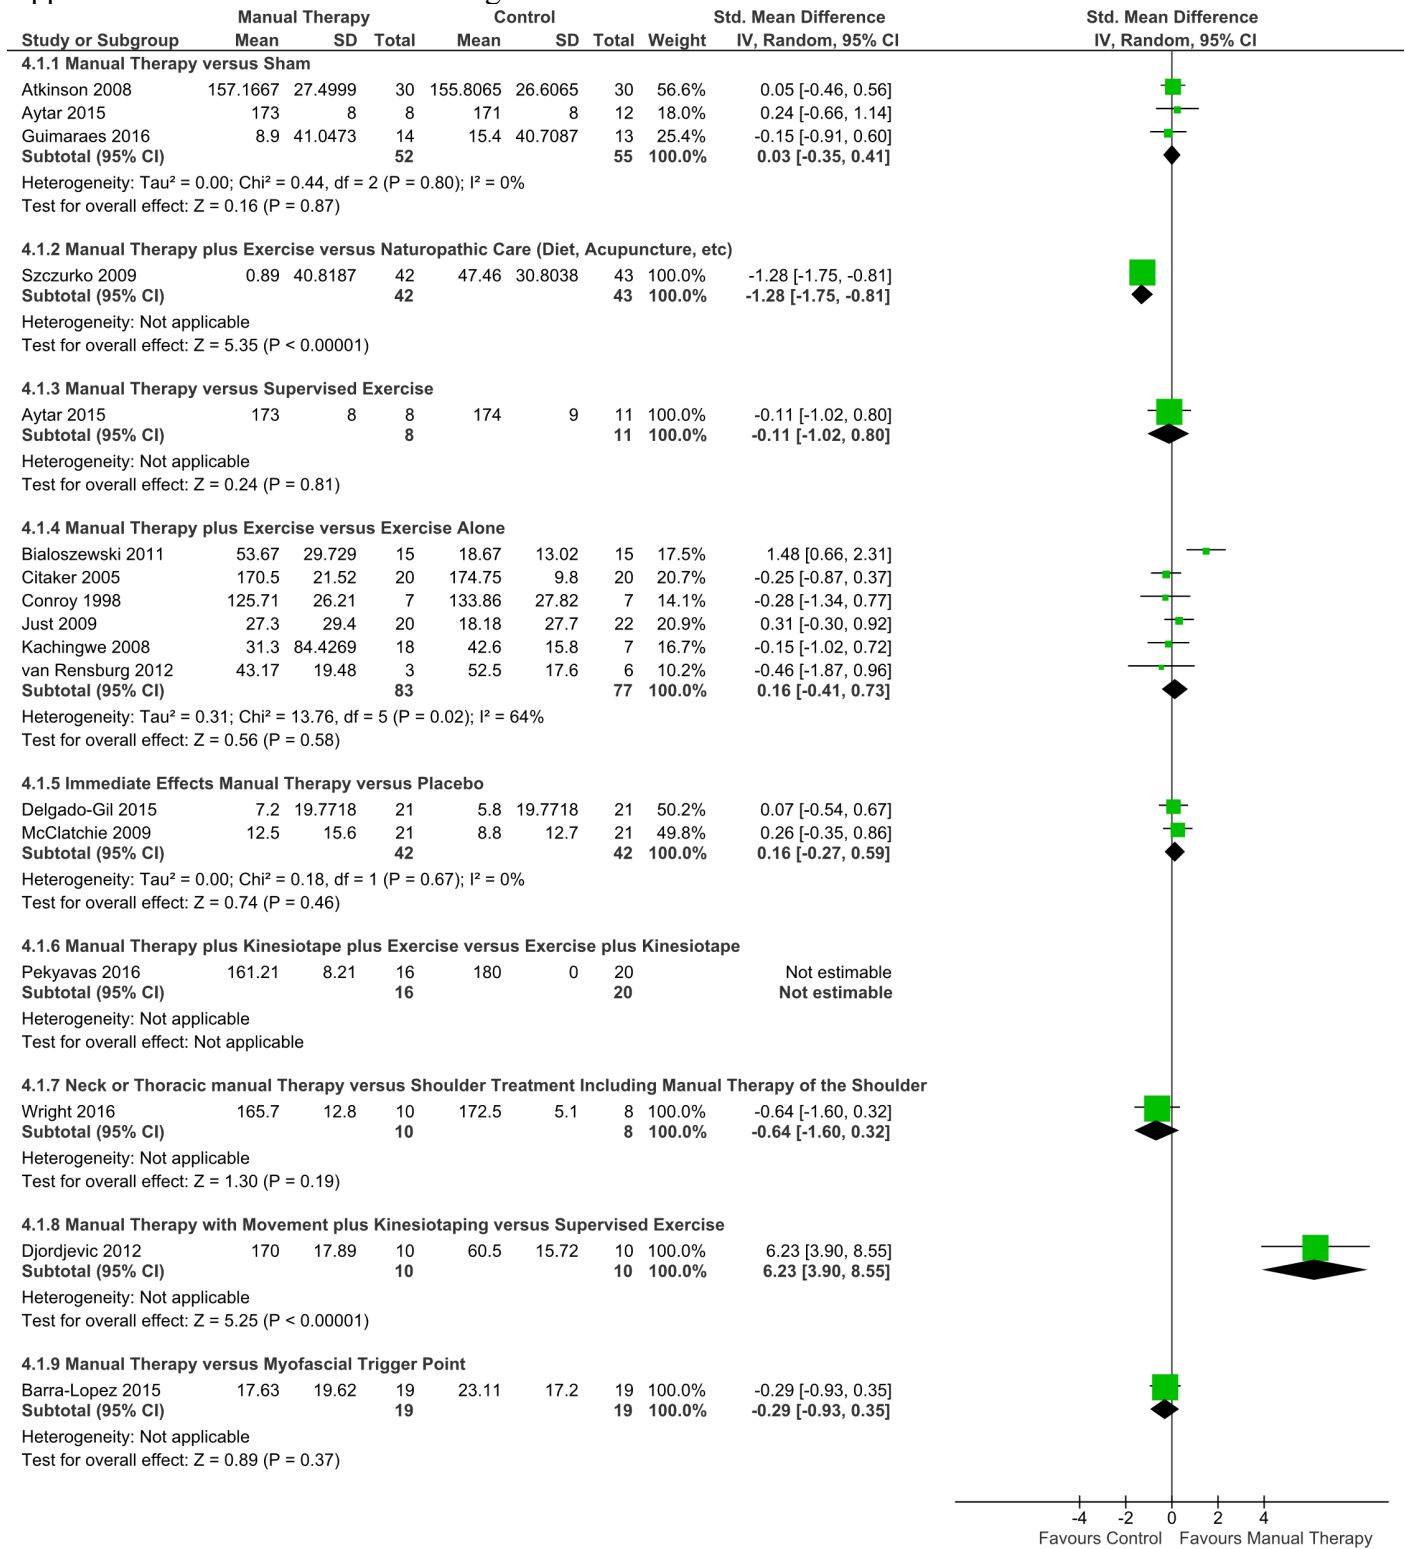

Figure Appendix-4c 7. Manual therapy: Outcome AROM at the longest follow-up

## Appendix 4c Forest Plots Active Range of Motion

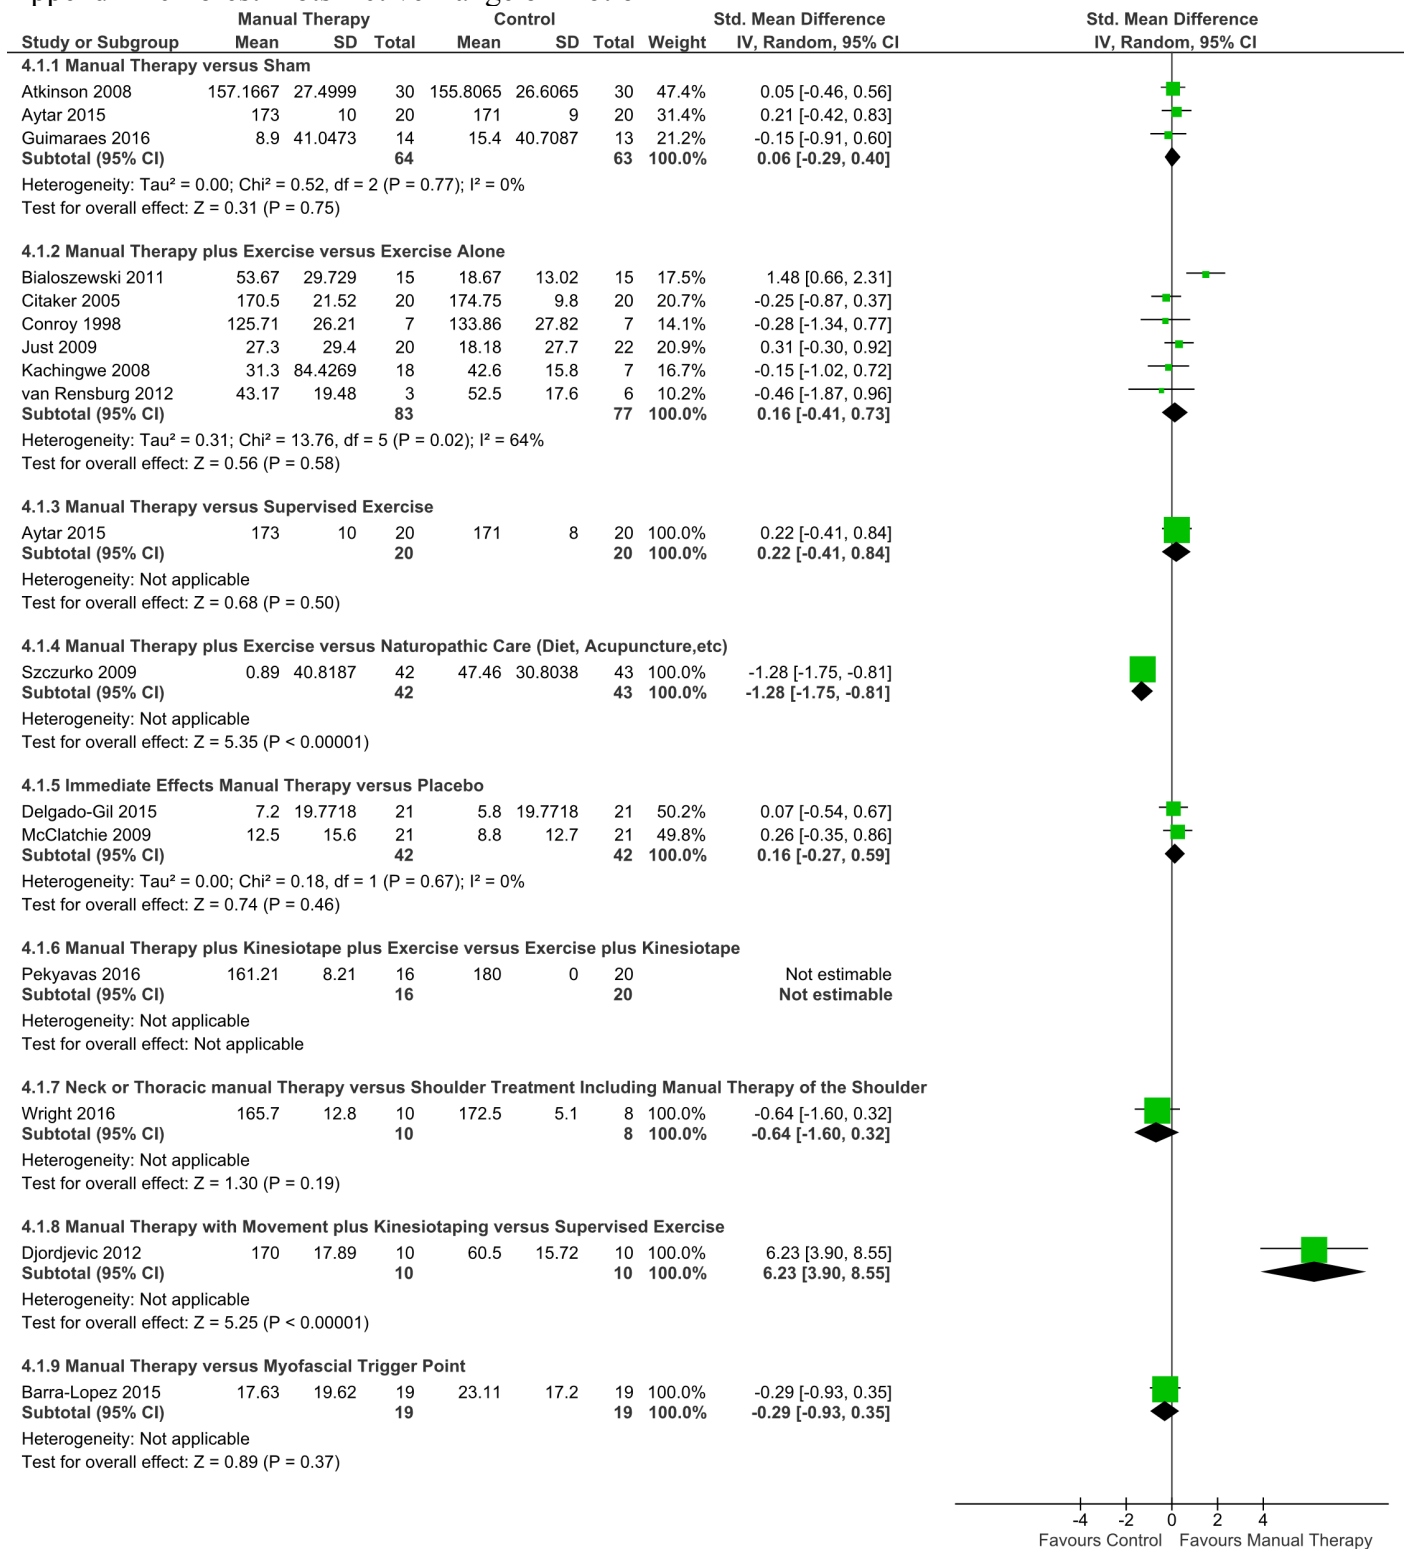

Figure Appendix-4c 8. Manual therapy: Outcome AROM at the shortest follow-up

## Appendix 4c Forest Plots Active Range of Motion

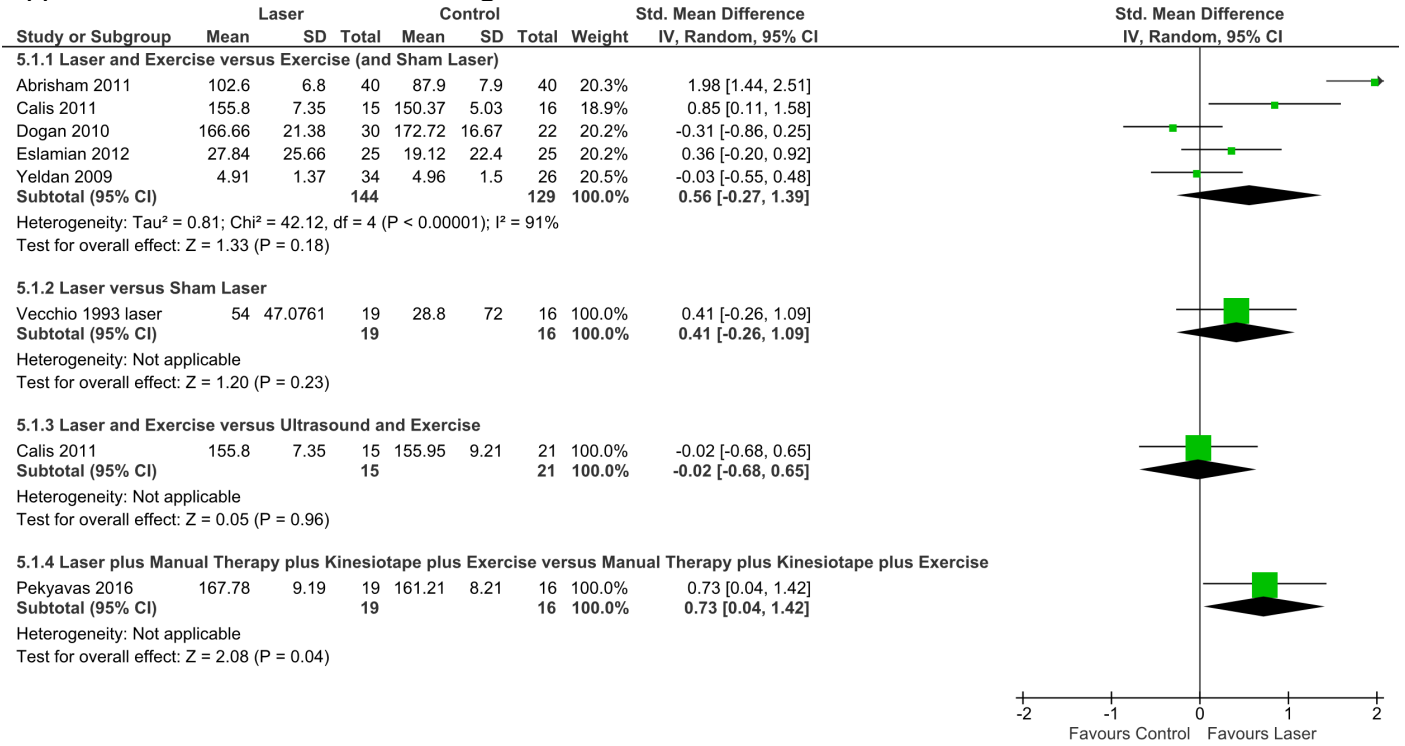

Figure Appendix-4c 9. Laser: Outcome AROM at the longest follow-up

## Appendix 4c Forest Plots Active Range of Motion

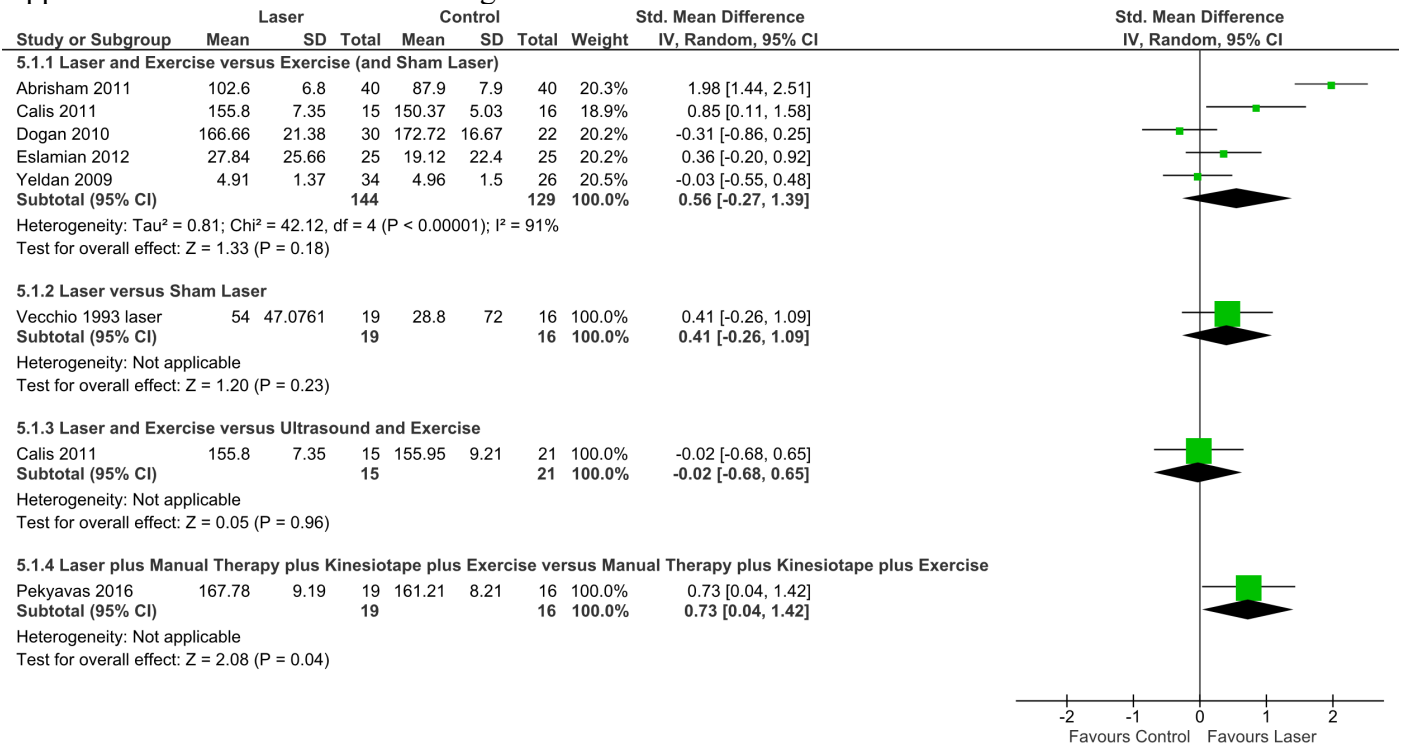

Figure Appendix-4c 10. Laser: Outcome AROM at the shortest follow-up

## Appendix 4c Forest Plots Active Range of Motion

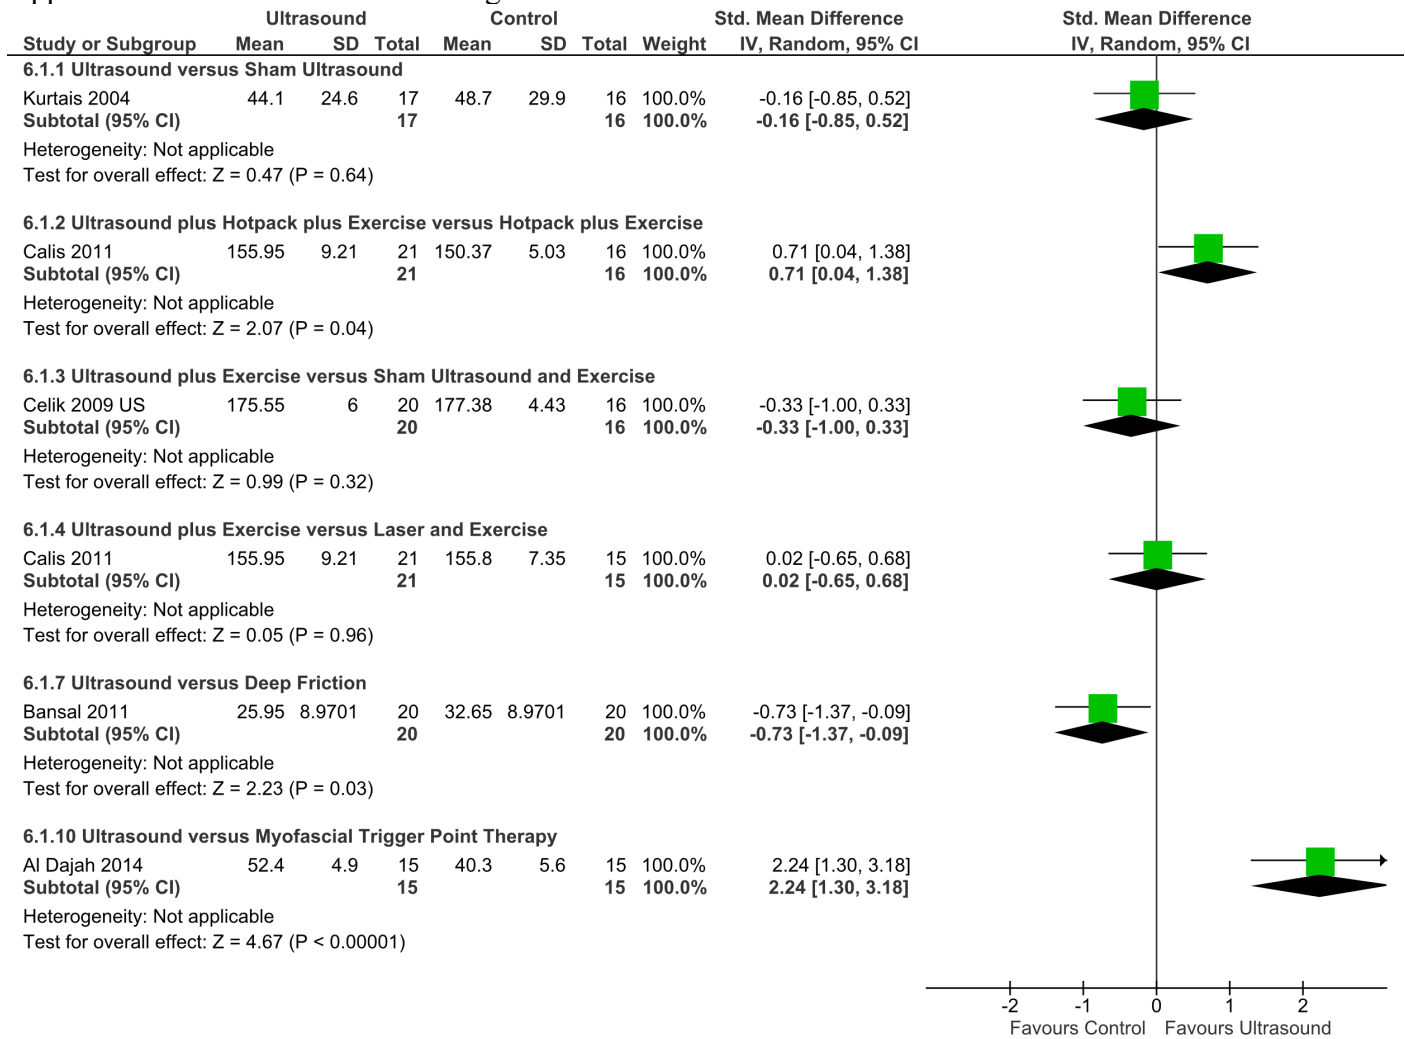

Figure Appendix-4c 11. Ultrasound: Outcome AROM at the longest follow-up



## Appendix 4c Forest Plots Active Range of Motion

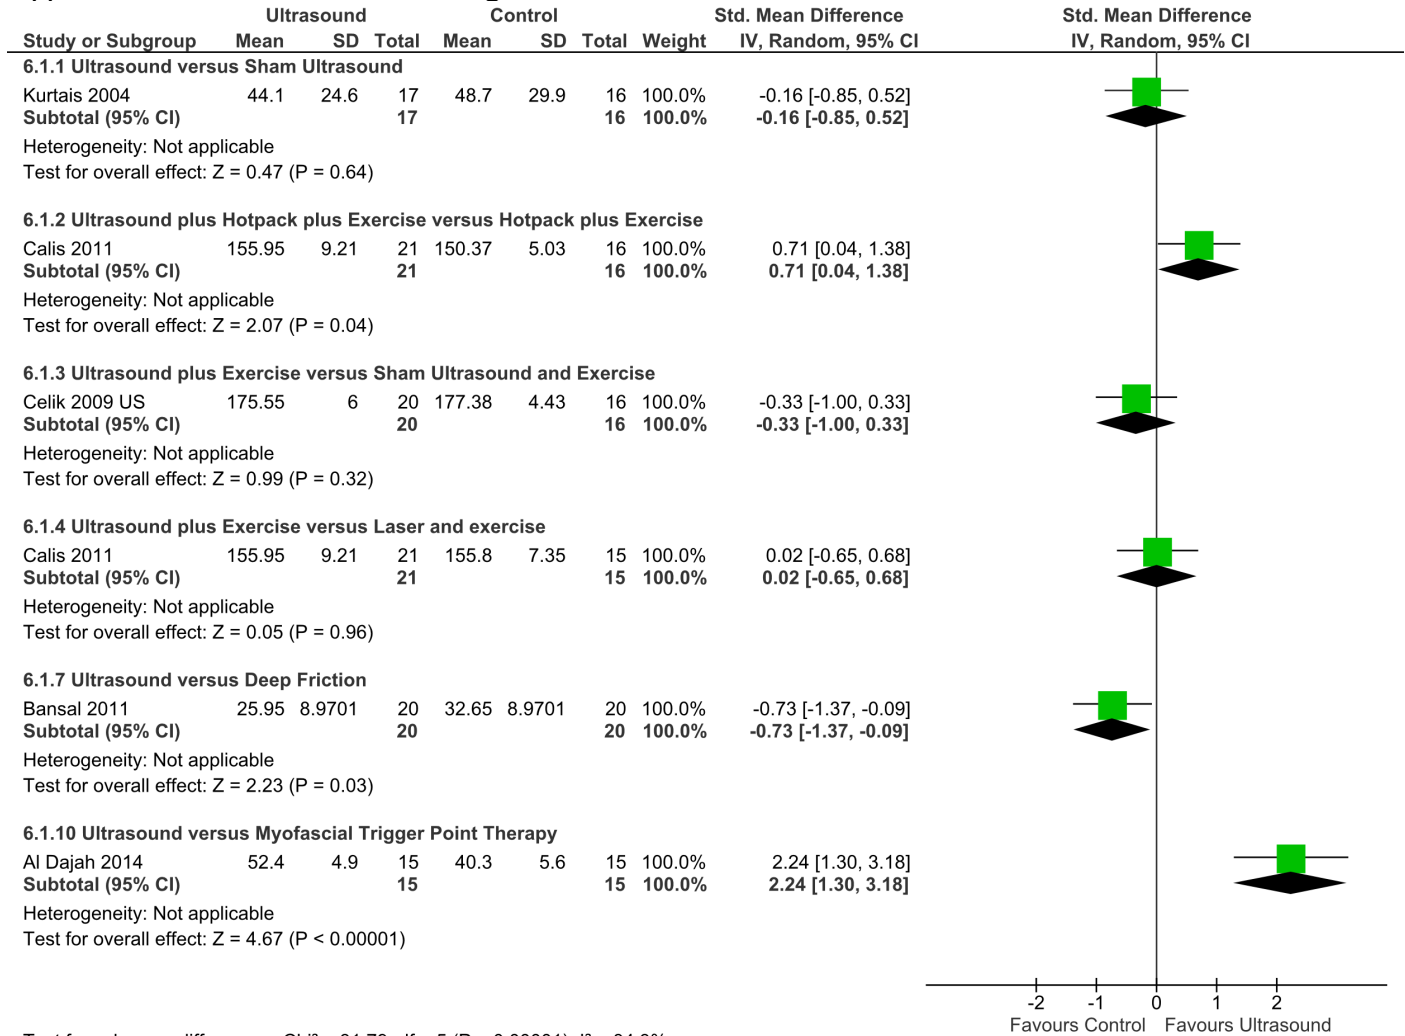

Figure Appendix-4c 12. Ultrasound: Outcome AROM at the shortest follow-up

Appendix 4c Forest Plots Active Range of Motion

Figure Appendix-4c 13. Extracorporeal shockwave therapy (ECSWT): Outcome AROM at the longest follow-up

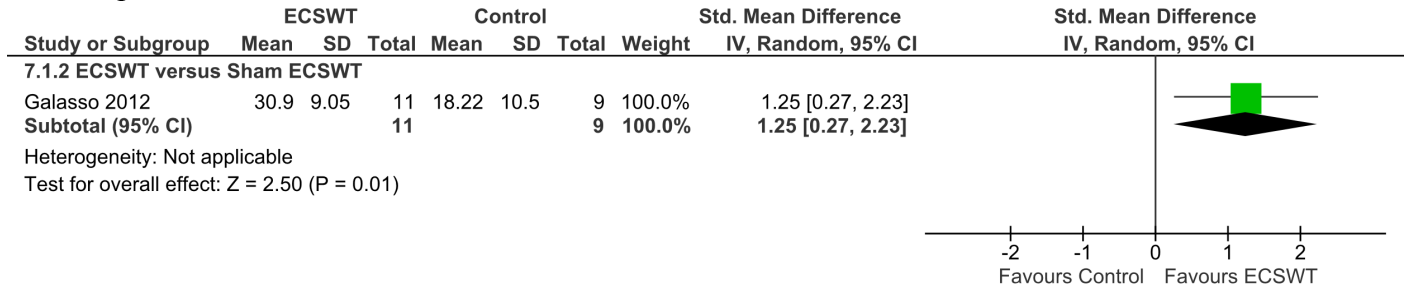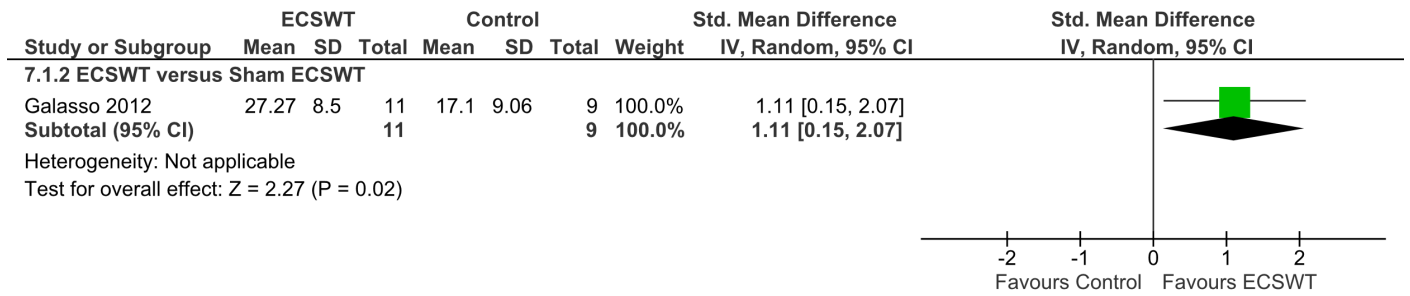

Figure Appendix-4c 14. Extracorporeal shockwave therapy (ECSWT): Outcome AROM at the shortest follow-up

## Appendix 4c Forest Plots Active Range of Motion

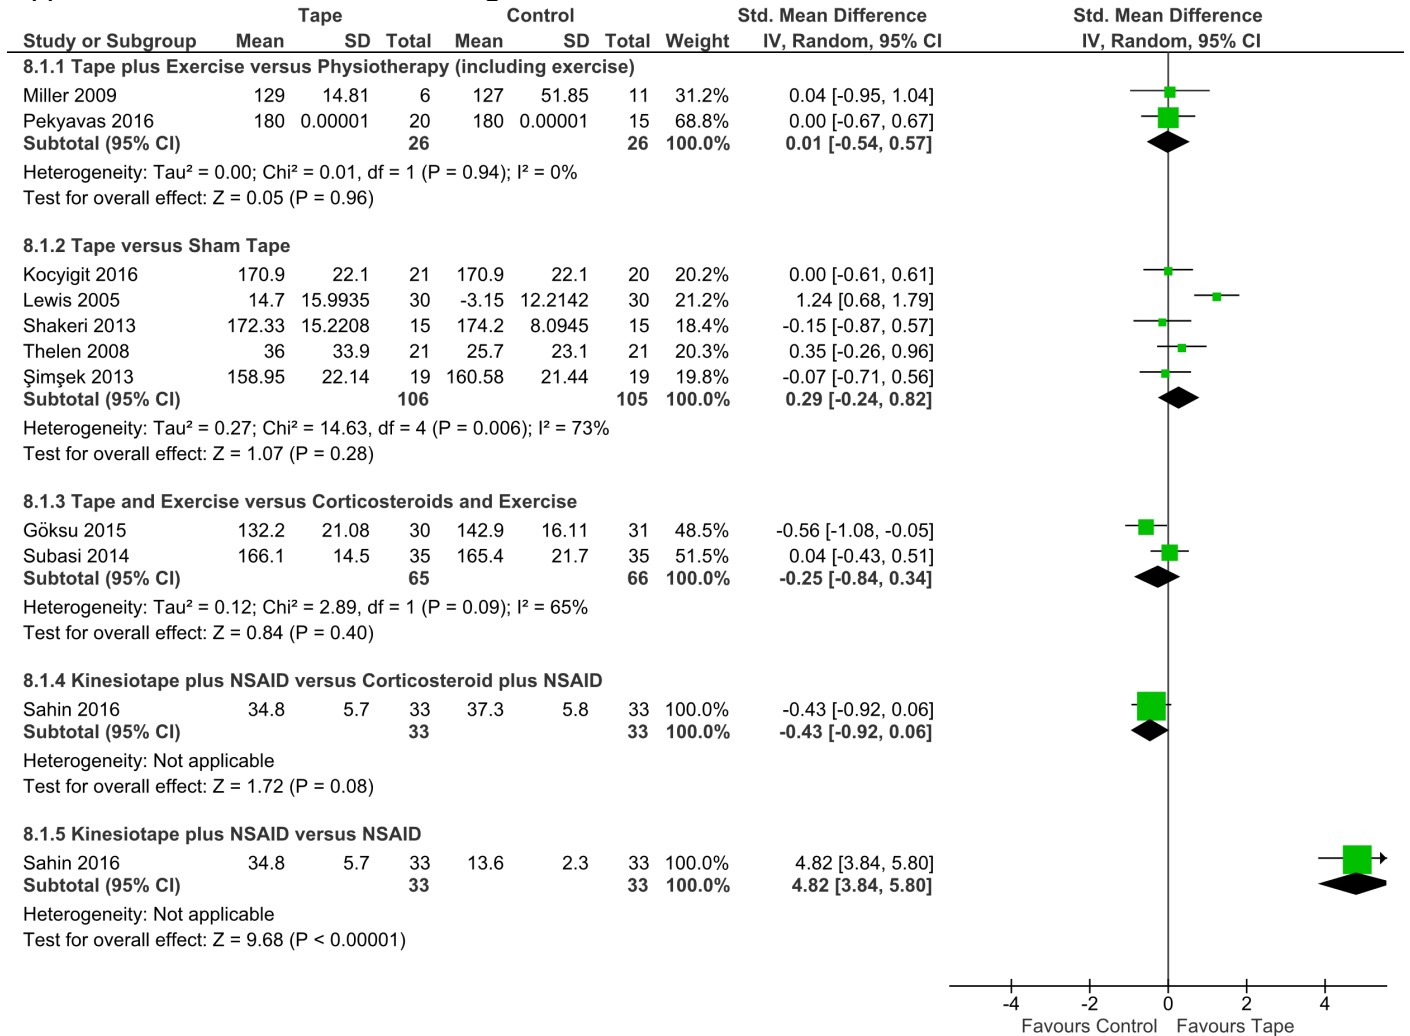

Figure Appendix-4c 15. Tape: Outcome AROM at the longest follow-up

## Appendix 4c Forest Plots Active Range of Motion

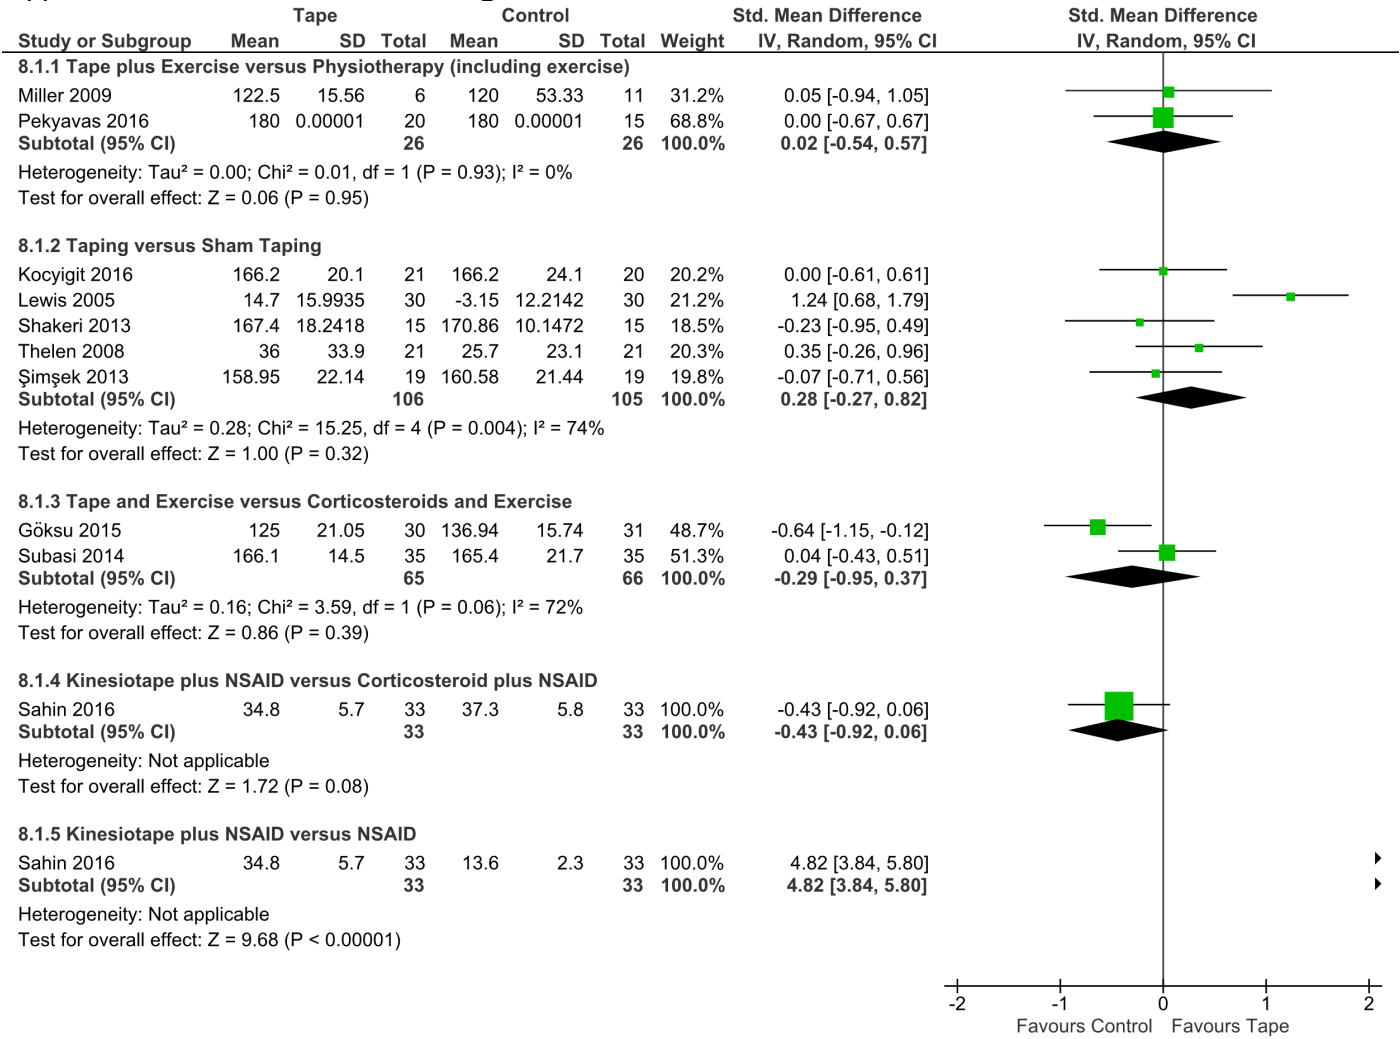

Figure Appendix-4c 16. Tape: Outcome AROM at the shortest follow-up

## Appendix 4c Forest Plots Active Range of Motion

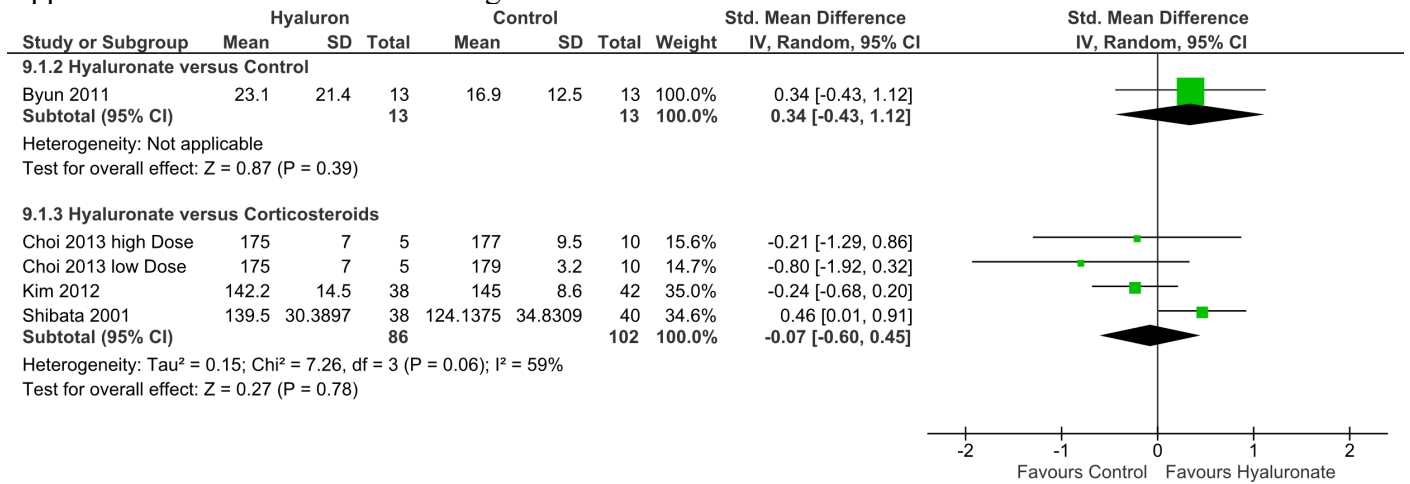

Figure Appendix-4c 17. Hyaluronate: Outcome AROM at the longest follow-up

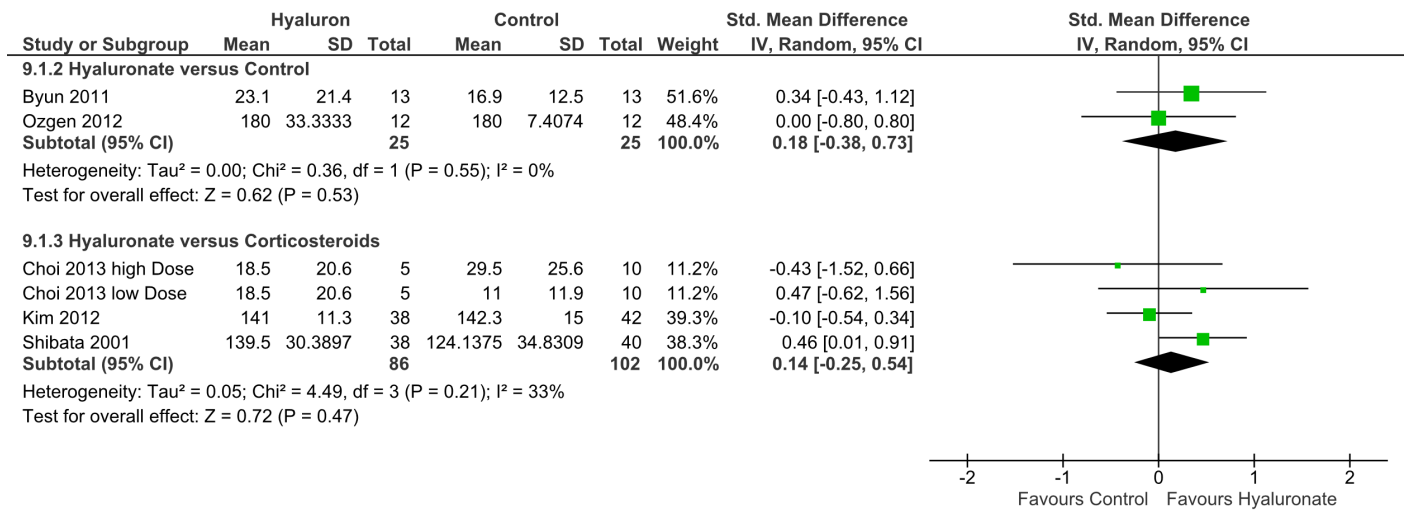

Figure Appendix-4c 18. Hyaluronate: Outcome AROM at the shortest follow-up

### Appendix 4c Forest Plots Active Range of Motion

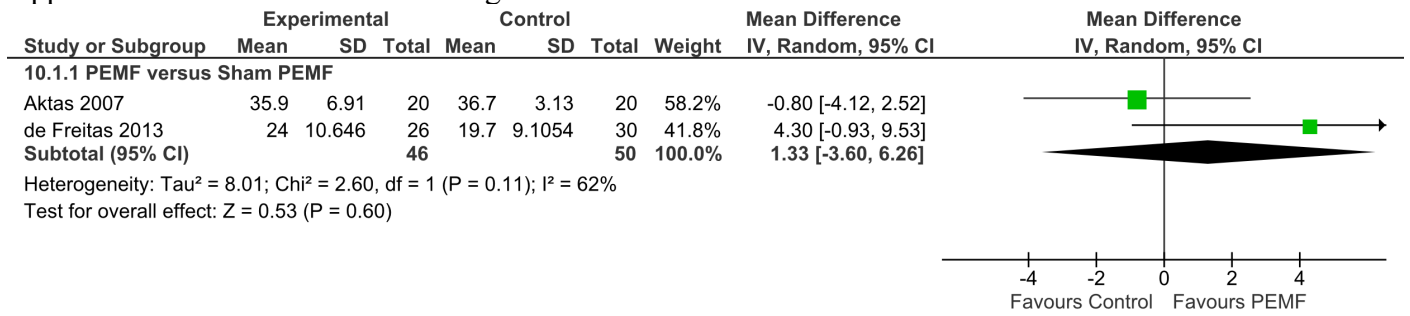

Figure Appendix-4c 19. PEMF: Outcome AROM at the longest follow-up

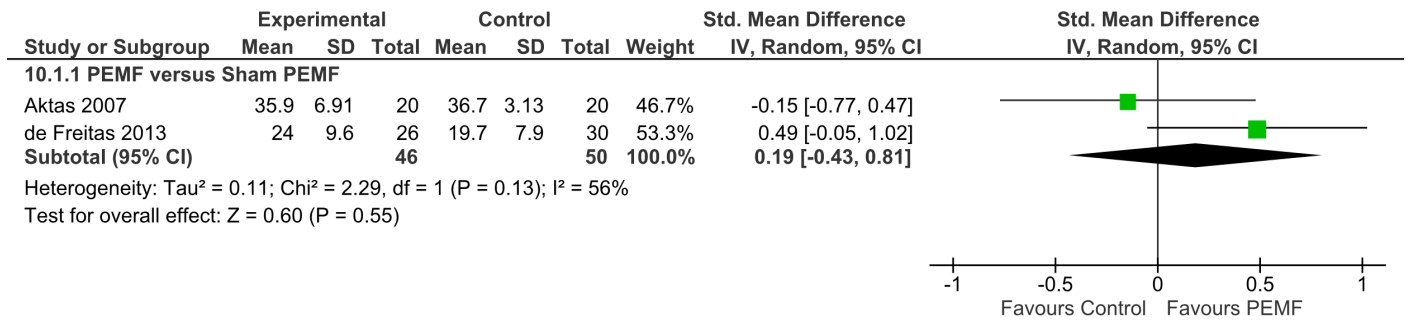

Figure Appendix-4c 20. PEMF: Outcome AROM at the shortest follow-up

### Appendix 4c Forest Plots Active Range of Motion

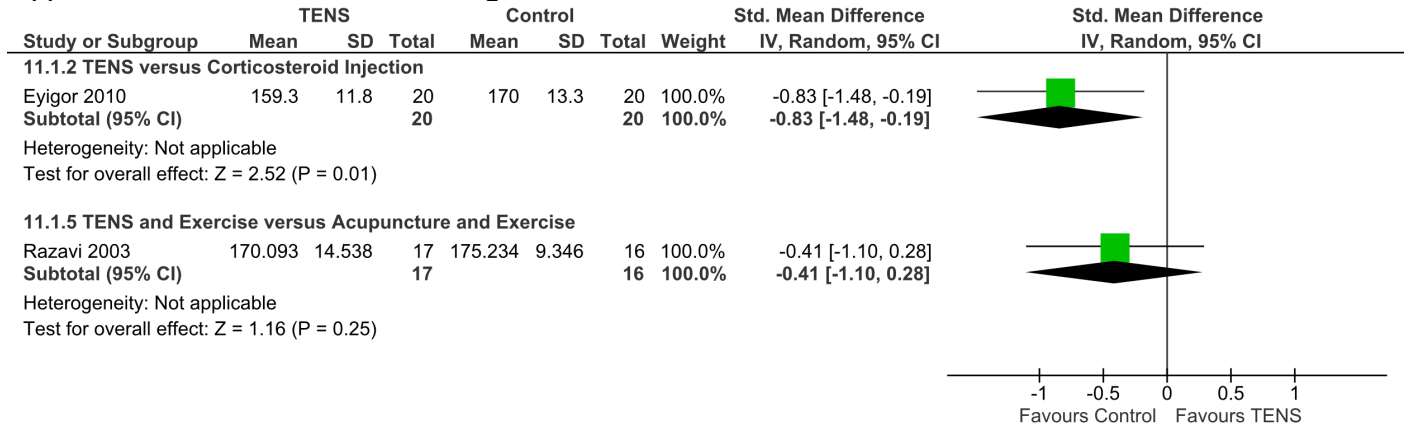

Figure Appendix-4c 21. TENS: Outcome AROM at the longest follow-up

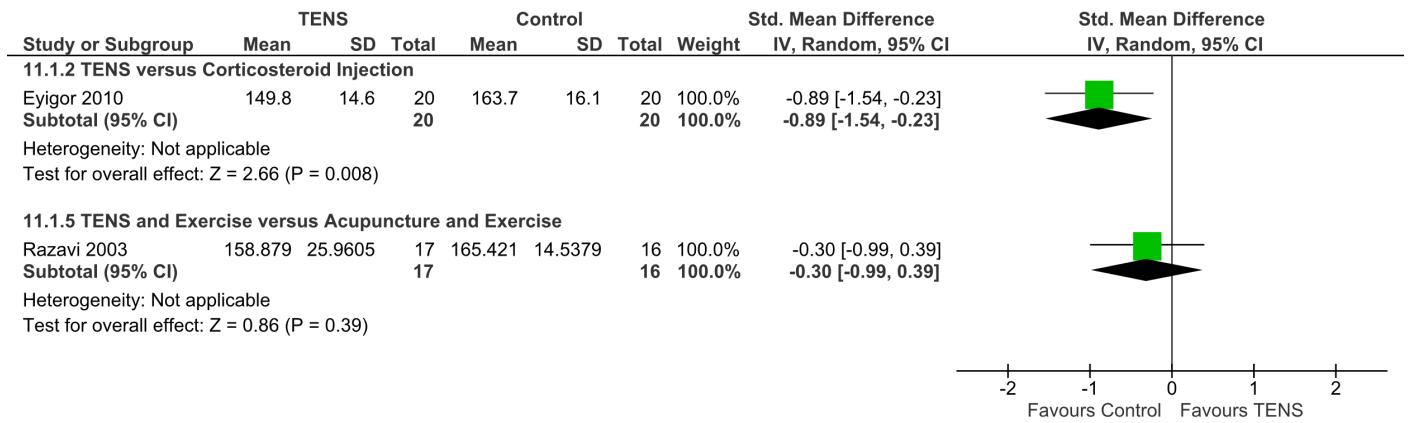

Figure Appendix-4c 22. TENS: Outcome AROM at the shortest follow-up



### Appendix 4c Forest Plots Active Range of Motion

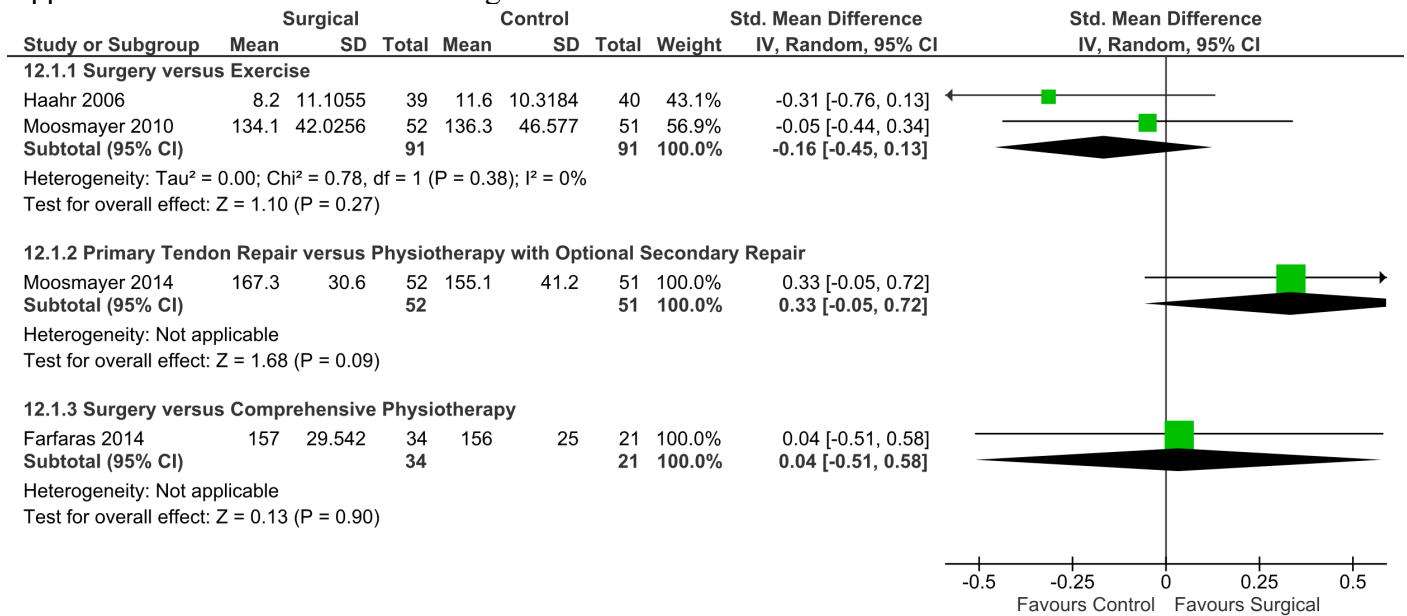

Figure Appendix-4c 23. Surgery: Outcome AROM at the longest follow-up

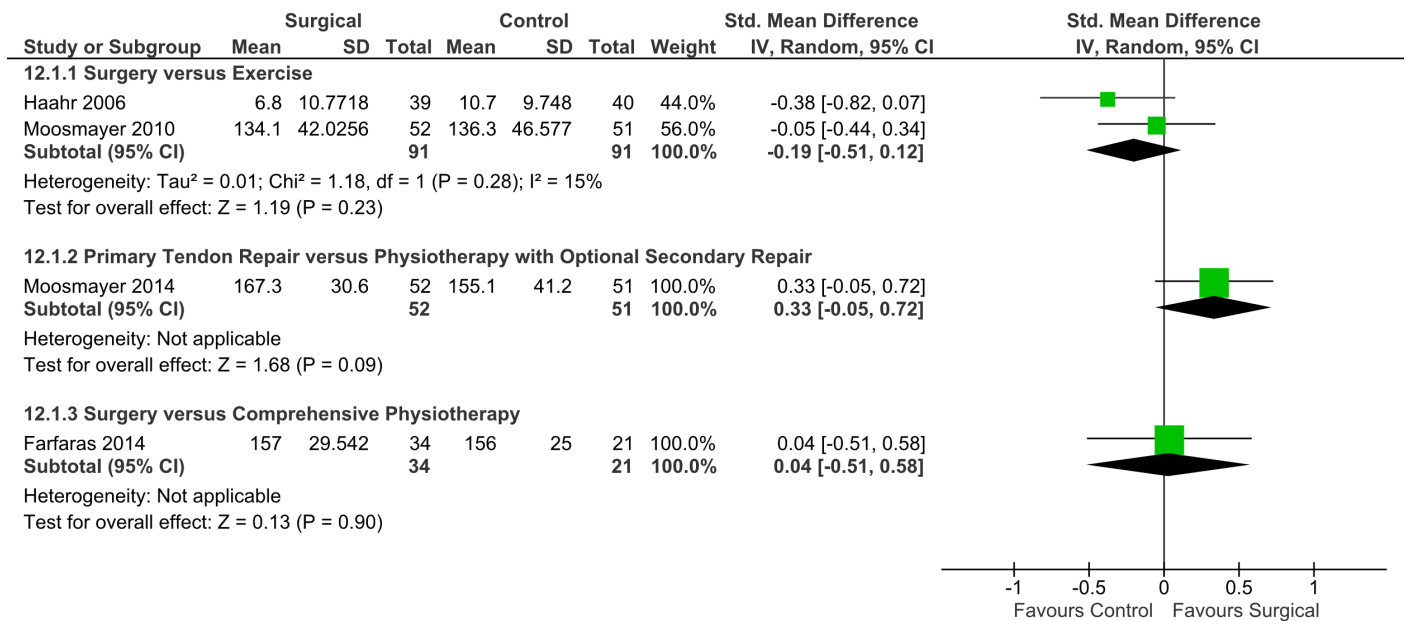

Figure Appendix-4c 24. Surgery: Outcome function at the shortest follow-up

### Appendix 4c Forest Plots Active Range of Motion

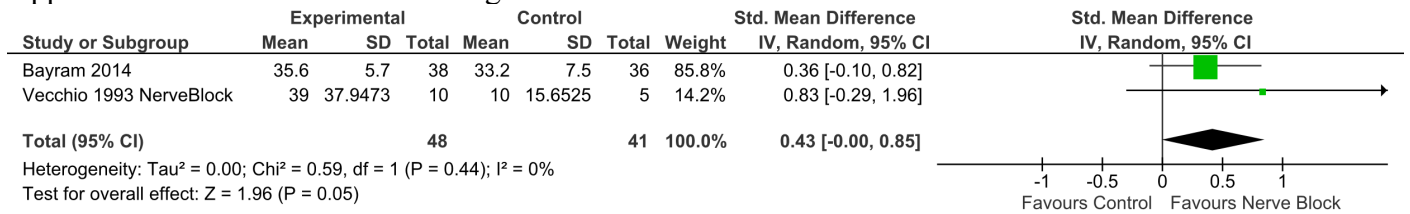

Figure Appendix-4c 25. Nerve block: Outcome AROM at the longest follow-up

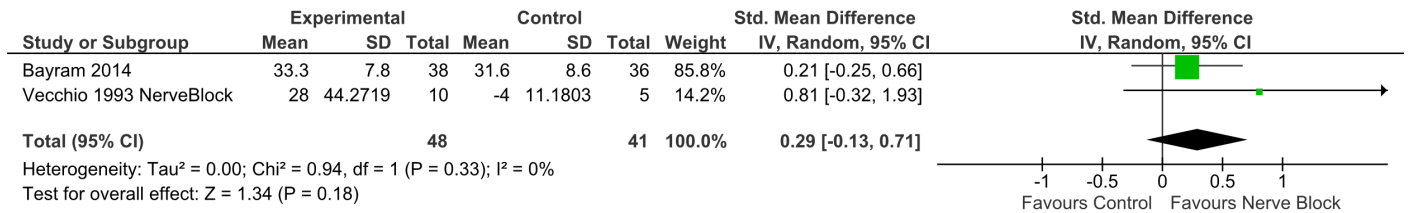

Figure Appendix-4c 26. Nerve block: Outcome AROM at the shortest follow-up

### Appendix 4c Forest Plots Active Range of Motion

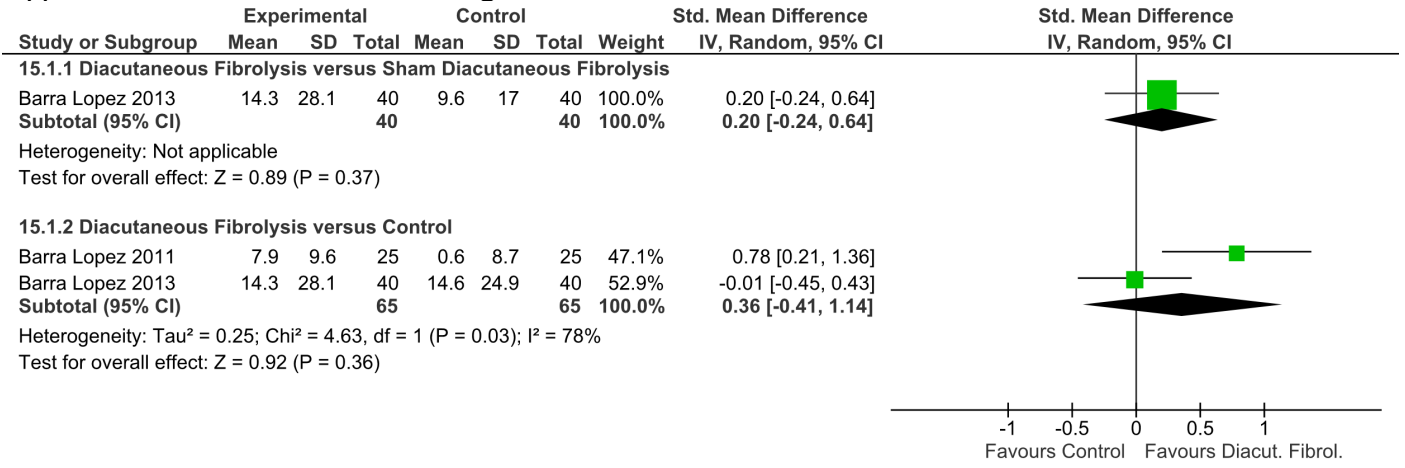

Figure Appendix-4c 27. Diacutaneous Fibrolysis: Outcome AROM at the longest follow-up

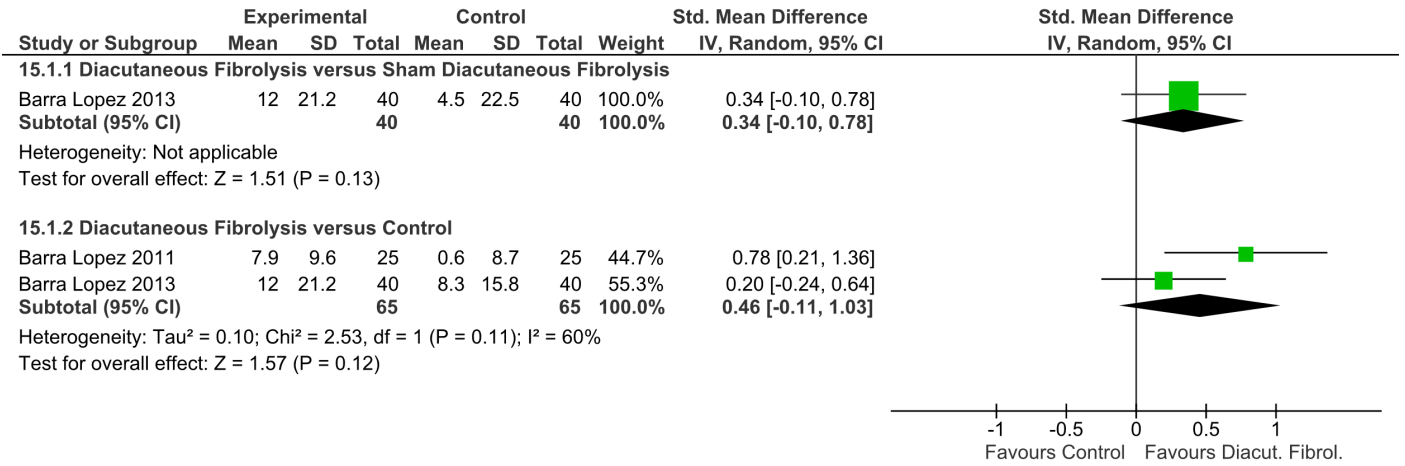

Figure Appendix-4c 28. Diacutaneous Fibrolysis: Outcome AROM at the shortest follow-up

## Appendix 4c Forest Plots Active Range of Motion

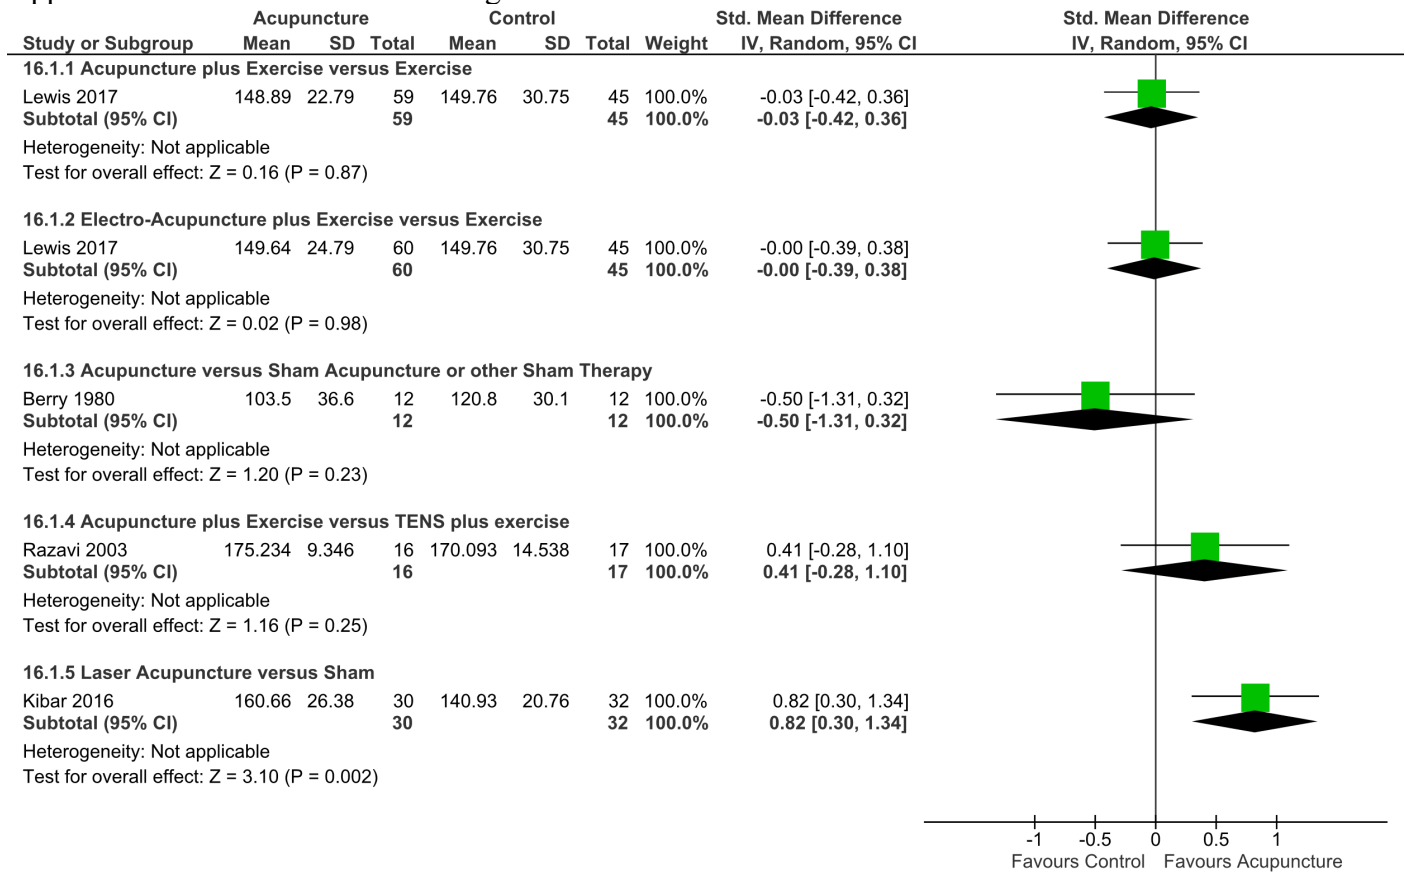

Figure Appendix-4c 29. Acupuncture: Outcome AROM at the longest follow-up

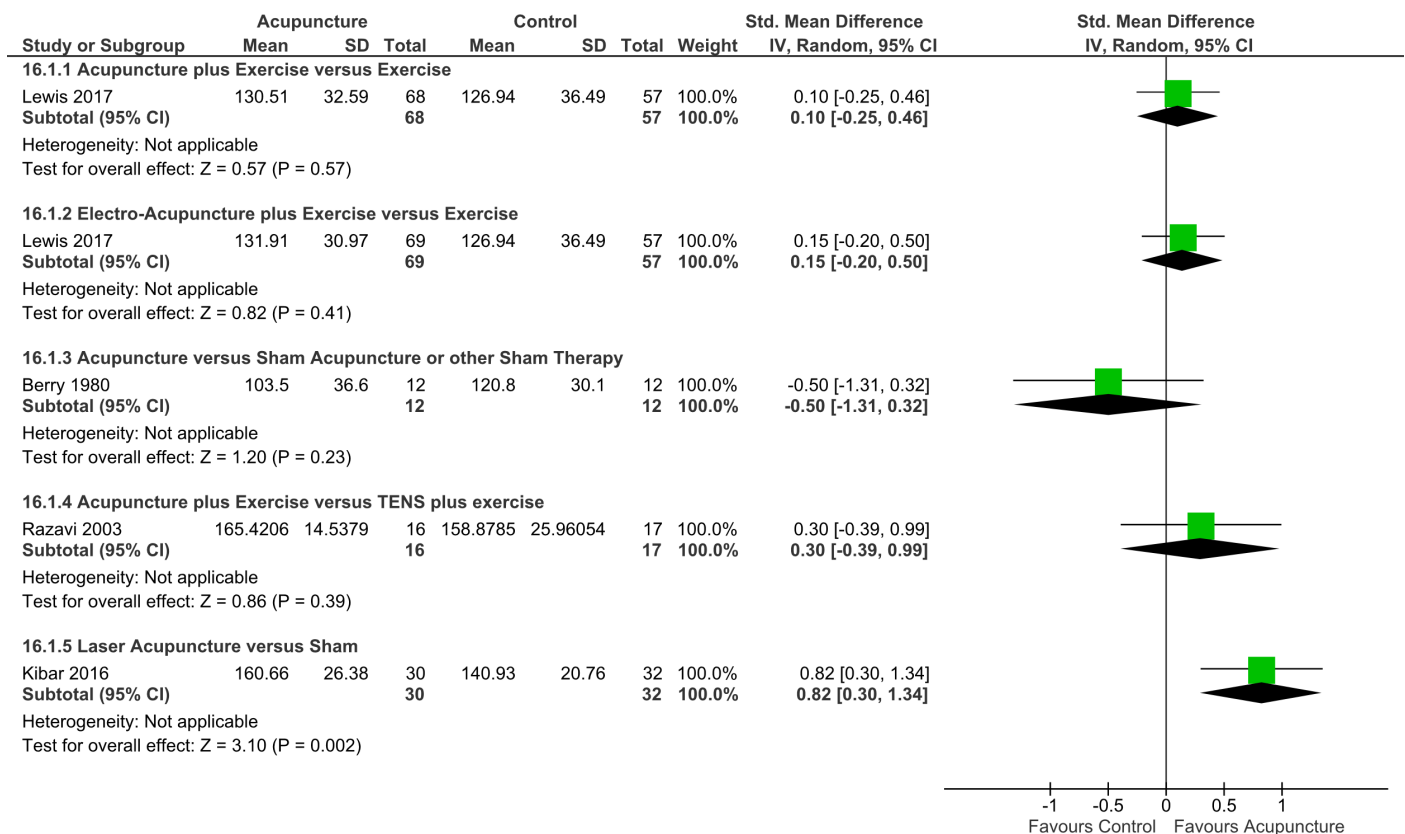

Figure Appendix-4c 30. Acupuncture: Outcome AROM at the shortest follow-up

### Appendix 4c Forest Plots Active Range of Motion

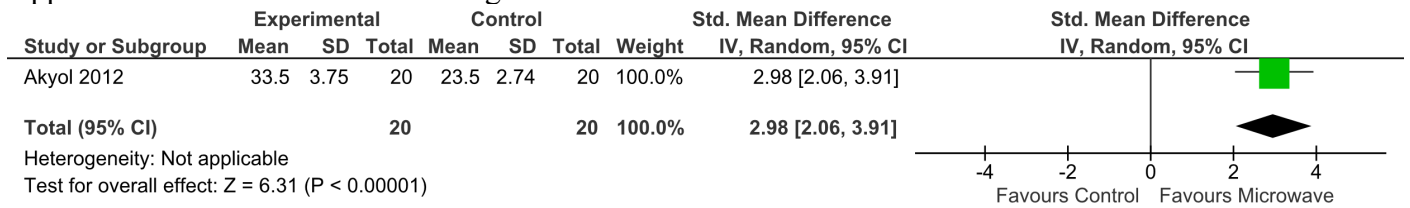

Figure Appendix-4c 31. Microwave: Outcome AROM at the longest follow-up

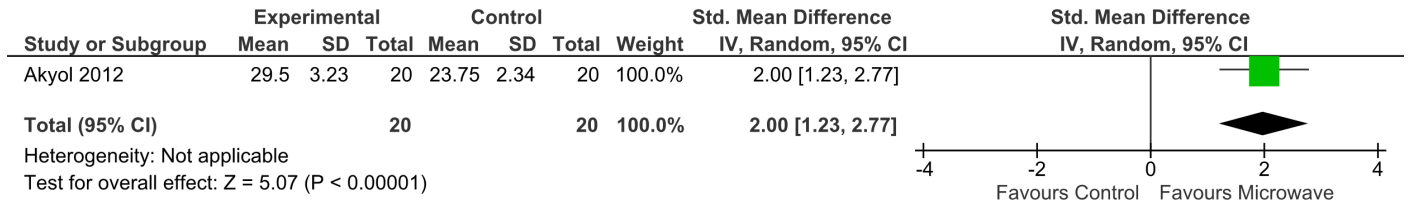

Figure Appendix-4c 32. Microwave: Outcome AROM at the shortest follow-up

### Appendix 4c Forest Plots Active Range of Motion

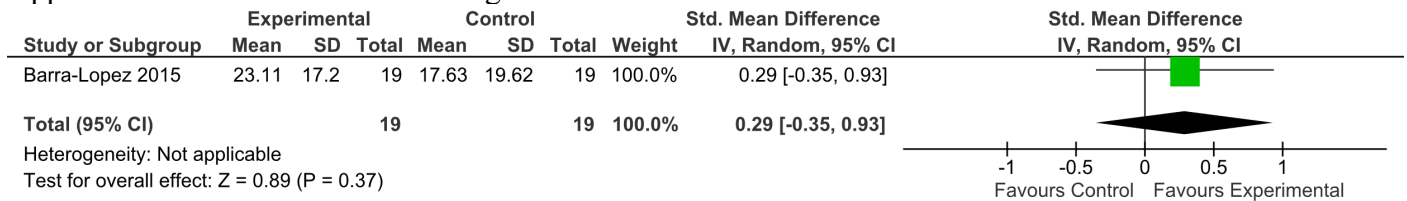

Figure Appendix-4c 33. Myofascial Trigger Point Interventions: Outcome AROM at the longest follow-up

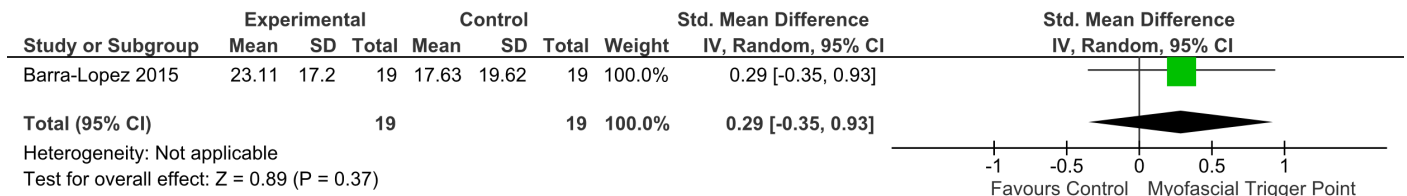

Figure Appendix-4c 34. Myofascial Trigger Point Interventions: Outcome AROM at the longest follow-up

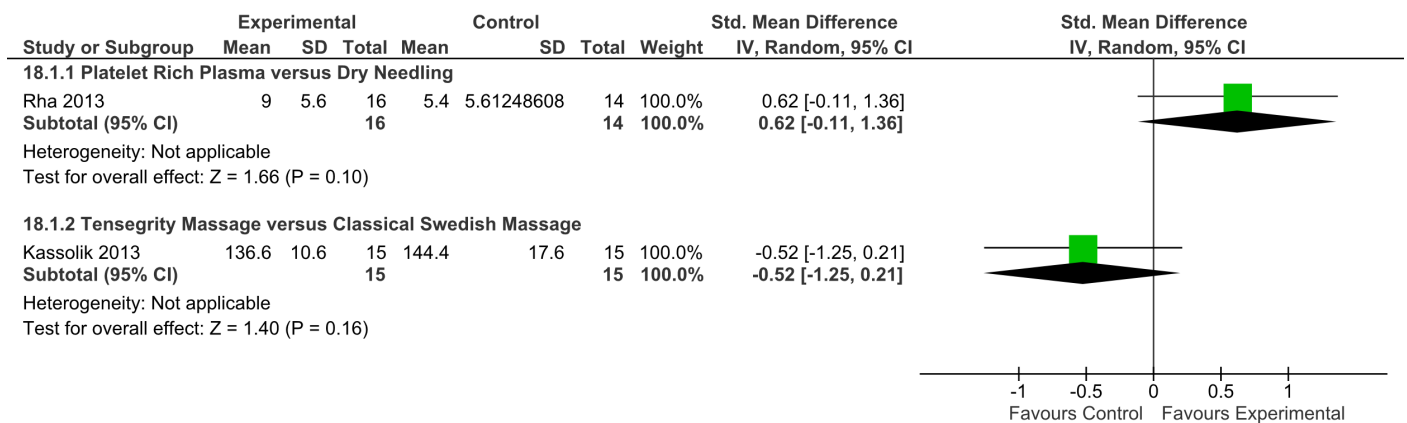

Figure Appendix-4c 35. Miscellaneous interventions: Outcome AROM at the longest follow-up

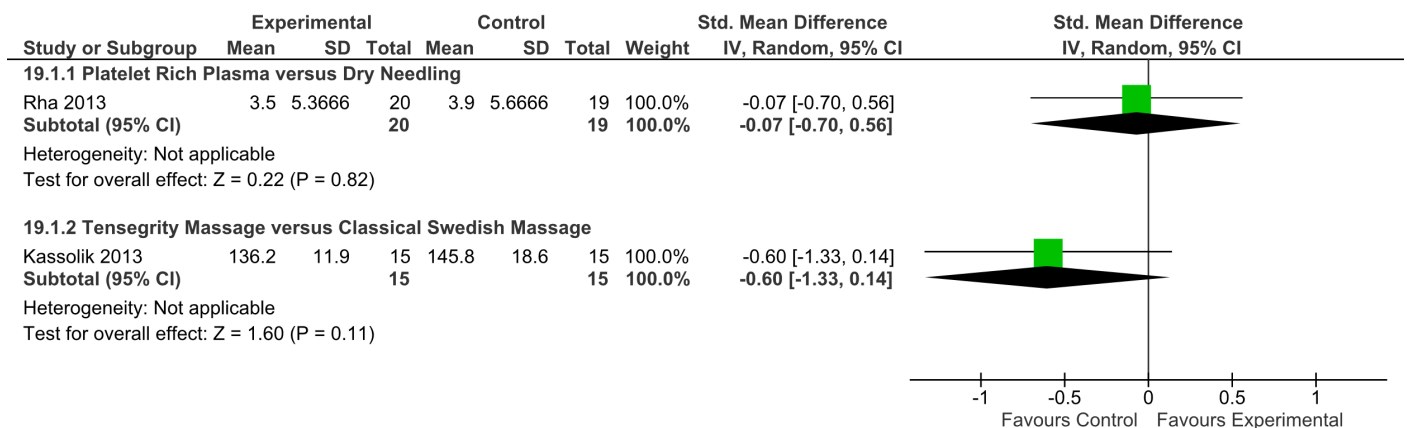

Figure Appendix-4c 36. Miscellaneous interventions: Outcome AROM at the longest follow-up
