# Supplementary material
Source: HighWire-hosted journal article supplement (https://bjsm.bmj.com/content/bjsports-2016-096515)
Supplement: inline-supplementary-material-8 [file inline-supplementary-material-8.pdf]

**Appendix 2:** Characteristics of included studies: Author, year, country, trial arms and intervention, clinical aspects and human sex ratio, applied tests to confirm diagnosis, measured outcome, conclusion of authors, and remarks.

| ID | Authors<br>Year<br>Reference<br>Country         | INTERVENTION/CONTROLS:<br>I: INTERVENTIONS<br>C: CONTROLS<br>1: GROUP 1<br>2: GROUP 2<br>3: GROUP 3<br>4: GROUP 4<br>5: GROUP 5<br><br>F&D: Frequency of Treatment, Duration of Treatment Period     | Clinical Aspects:<br><br>A: Inclusion Age<br>D: Duration of Symptoms (months if not stated otherwise)<br>Co: Comment | N: Included [Randomized]<br><br>Analysed :<br>I:<br>C: | Mean age (SD, Range)                                     | Female/ Male                               | Inclusion based on Test to confirm Diagnosis                     | Relevant Outcome/ Time of assessment      | Conclusion of Study- Authors                                                                                                                                                                                             | Remarks                                   |
|----|-------------------------------------------------|------------------------------------------------------------------------------------------------------------------------------------------------------------------------------------------------------|----------------------------------------------------------------------------------------------------------------------|--------------------------------------------------------|----------------------------------------------------------|--------------------------------------------|------------------------------------------------------------------|-------------------------------------------|--------------------------------------------------------------------------------------------------------------------------------------------------------------------------------------------------------------------------|-------------------------------------------|
| 1  | Abrisham<br>2011<br><br>[1]<br><br>Iran         | I: Low Level Laser + Exercise<br><br>C: Placebo + Exercise<br><br>F&D: 10 Sessions in 2 wks.                                                                                                         | A: >18<br><br>D: Not Specified                                                                                       | 80 [80]<br><br>I: 40<br>C: 40                          | Ø: 52                                                    | 50/30<br><br>I: 24/16<br>C: 26/14          | Hawkins–Kennedy<br>Jobe<br>Neer<br>Speed                         | AROM<br>VAS<br><br>T1                     | “Low level laser (LLL) combined with exercise therapy is more effective than exercise therapy alone.”                                                                                                                    | <b>Female: +</b>                          |
| 2  | Adebajo<br>1990<br><br>[2]<br><br>Great Britain | 1: Oral Diclofenac + Injection of Lignocaine<br><br>2: Placebo Oral + Injection of Lignocaine + Steroid<br><br>3: Oral Placebo + Injection of Lignocaine<br><br>F&D: 50 mg 3 Times daily for 28 days | A: Not Specified<br><br>D: >3<br>1: 7.7 (0.8)<br>2: 8.6 (0.6)<br>3: 8.5 (0.8)                                        | 60 [60]<br><br>1: 20<br>2: 20<br>3: 20                 | Ø<br><br>1: 53.8 (2.9)<br>2: 51.3 (2.5)<br>3: 54.8 (2.8) | 28/32<br><br>1: 11/9<br>2: 8/12<br>3: 9/11 | Cyriax’s Criteria<br>Painful Arc<br>Resisted test                | AROM<br>Function<br>VAS<br><br>T1         | “Oral diclofenac and subacromial triamcinolone are of benefit in the treatment of rotator cuff tendinitis.”                                                                                                              |                                           |
| 3  | Akgun<br>2004<br><br>[3]<br><br>Turkey          | 1. Lignocaine + Methylprednisolone<br><br>2. Lignocaine + Methylprednisolone<br><br>3 Lignocaine<br><br>F&D: Injections 10 Days apart + Home Exercise                                                | A: Not Specified<br><br>D: Not Specified<br><br>Co: Excluded NSAID during the preceding 3 months.                    | 48 [48]<br><br>1: 16<br>2: 16<br>3: 16                 | Ø<br><br>1: 48.5 (8.5)<br>2: 50.5 (7.6)<br>3: 47.5 (9.5) | 33/15<br><br>1. 12/4<br>2. 11/5<br>3. 10/6 | Hawkins-Kennedy<br>Neer<br><br>Painful Arc<br><br>MRI (Stage II) | Constant<br>VAS<br><br>T1                 | “Corticosteroid injections in the acute or sub acute phase of SIS provided additional beneficial effect when used together with NSAIDs and exercise in the short term without any complication.”                         | <b>Female: +</b><br><br><b>Unilateral</b> |
| 4  | Akkaya<br>2016<br><br>[4]<br><br>Turkey         | I: Weighted pendulum exercise<br><br>C: Un-weighted Pendulum exercise<br><br>F&D: 3 times daily for 4 wks.                                                                                           | A: Not Specified<br><br>D:<br>I: 7.2 (4.3)<br>C: 6.6 (4.1)                                                           | 45 [35]<br><br>I: 18<br>C: 16                          | Ø<br><br>I: 42.9 (8.5)<br>C: 40.4 (9.4)                  | 23/11<br><br>I: 15/5<br>C: 15/5            | Hawkins-Kennedy<br>Jobe<br>Neer<br><br>Painful Arc               | AROM<br>SPADI<br>VAS<br><br>AHD<br><br>T1 | “While significant clinical improvements were achieved with both weighted and un-weighted solo pendulum exercises, no significant difference was detected for ultrasonography AHD measurements between exercise groups.” | <b>Female: +</b><br><br><b>Unilateral</b> |

| ID | Authors<br>Year<br>Reference<br>Country         | INTERVENTION/CONTROLS:<br>I: INTERVENTIONS<br>C: CONTROLS<br>1: GROUP 1<br>2: GROUP 2<br>3: GROUP 3<br>4: GROUP 4<br>5: GROUP 5<br><br>F&D: Frequency of Treatment, Duration<br>of Treatment Period | Clinical<br>Aspects:<br><br>A: Inclusion<br>Age<br>D: Duration<br>of<br>Symptoms<br>(months if<br>not stated<br>otherwise)<br>Co:<br>Comment | N:<br>Included<br>[Random<br>ized]<br><br>Analysed<br>:<br>I:<br>C: | Mean<br>age (SD,<br>Range)                                  | Female/<br>Male                   | Inclusion<br>based on Test<br>to confirm<br>Diagnosis                               | Relevant<br>Outcome/<br>Time of<br>assessment   | Conclusion of Study-<br>Authors                                                                                                                                                                                                                                                 | Remarks                                                                 |
|----|-------------------------------------------------|-----------------------------------------------------------------------------------------------------------------------------------------------------------------------------------------------------|----------------------------------------------------------------------------------------------------------------------------------------------|---------------------------------------------------------------------|-------------------------------------------------------------|-----------------------------------|-------------------------------------------------------------------------------------|-------------------------------------------------|---------------------------------------------------------------------------------------------------------------------------------------------------------------------------------------------------------------------------------------------------------------------------------|-------------------------------------------------------------------------|
| 5  | Aksakal<br>2016<br><br>[5]<br><br>Turkey        | I: Injection of 8 mg Lornoxicam<br><br>C: Injection of 7,0 mg Betamethason<br><br>F&D: One single dose injection                                                                                    | A: >18<br><br>D: weeks<br>I: 3 (2-7)<br>C: 3 (2-8)                                                                                           | 70 [70]<br><br>I: 35<br>C: 35                                       | ∅<br><br>I: 53<br>(47-63)<br>C: 53<br>(46-68)               | 44/26<br><br>I: 21/14<br>C: 23/12 | Hawkins-<br>Kennedy<br>Neer<br><br>MRI                                              | Constant<br>UCLA<br><br>T1/T2/T3                | "Although a single subacromial lornoxicam injection provides rapid functional recovery, which partially extends into the intermediate term, its results are inferior to betamethasone and it may be an alternative only in patients where corticosteroids are contraindicated." | <b>Female: +</b><br><br><b>Unilateral</b><br><br>No data<br>Extractable |
| 6  | Aktas<br>2007<br><br>[6]<br><br>Turkey          | I: Pulsed Electromagnetic Field (PEMF)<br><br>C: Sham PEMF<br><br>F&D: 15 Sessions for 3 wks. with active<br>and passive elements                                                                   | A: Not<br>Specified<br><br>D:<br>I: 4.82 (3.75)<br>C: 4.80 (3.47)<br><br>Co: Excluded<br>NSAID during<br>the preceding<br>3 months.          | 46 [46]<br><br>I: 20<br>C: 20                                       | ∅<br><br>I: 48.7<br>(9.0)<br>C: 53.9<br>(11.2)              | 30/10<br><br>I: 15/5<br>C: 15/5   | Hawkins-<br>Kennedy<br>Neer<br><br>Painful Arc<br><br>Injection Test                | Constant<br>VAS<br><br>T1                       | "No convincing evidence that PEMF therapy is of additional benefit in SIS acute phase rehabilitation program."                                                                                                                                                                  | <b>Female: +</b><br><br><b>Unilateral</b>                               |
| 7  | Akyol<br>2012<br><br>[7]<br><br>Turkey          | I: Microwave, Hotpacks + Exercise<br><br>C: Sham Microwave, Hotpacks + Exercise<br><br>F&D: 15 Sessions for 3 wks.                                                                                  | A: Not<br>Specified<br><br>D: >3<br>I: 10.5 (8.59)<br>C: 14.1<br>(18.38)                                                                     | 40 [40]<br><br>I: 20<br>C: 20                                       | ∅ (21-<br>71)<br><br>I: 55.3<br>(14.5)<br>C: 51.2<br>(6.82) | 30/10<br><br>I: 15/5<br>C: 15/5   | Hawkins-<br>Kennedy<br>Neer<br><br>Painful Range<br>of Motion<br><br>MRI: Reference | SDQ<br>SPADI<br>VAS<br><br>T2                   | "No evidence that true microwave diathermy, as compared with sham microwave diathermy, is beneficial."                                                                                                                                                                          | <b>Female: +</b><br><br><b>Unilateral</b>                               |
| 8  | Al Dajah<br>2014<br><br>[8]<br><br>South Arabia | I: Myofascial Trigger Point Therapy (Soft<br>tissue mobilization)<br><br>C: Ultrasound alone<br><br>F&D: One Single Sessions                                                                        | A: 40-60<br><br>D: Not<br>Specified                                                                                                          | 30 [30]<br><br>I: 15<br>C: 15                                       | Not<br>Specified                                            | Not<br>Specified                  | Diagnosis of<br>SIS<br><br>Neer Positive                                            | Active<br>External<br>Rotation<br>VAS<br><br>T1 | "Confirmed the immediate effect of STM with PNF and significant values for reduction in pain, increased glenohumeral external rotation and overhead reach were obtained."                                                                                                       |                                                                         |

| ID | Authors<br>Year<br>Reference<br>Country                | INTERVENTION/CONTROLS:<br>I: INTERVENTIONS<br>C: CONTROLS<br>1: GROUP 1<br>2: GROUP 2<br>3: GROUP 3<br>4: GROUP 4<br>5: GROUP 5<br><br>F&D: Frequency of Treatment, Duration<br>of Treatment Period | Clinical<br>Aspects:<br><br>A: Inclusion<br>Age<br>D: Duration<br>of<br>Symptoms<br>(months if<br>not stated<br>otherwise)<br>Co:<br>Comment | N:<br>Included<br>[Random<br>ized]<br><br>Analysed<br>:<br>I:<br>C: | Mean<br>age (SD,<br>Range)                      | Female/<br>Male                   | Inclusion<br>based on Test<br>to confirm<br>Diagnosis                                                     | Relevant<br>Outcome/<br>Time of<br>assessment               | Conclusion of Study-<br>Authors                                                                                                                                                                                                                                 | Remarks                                                                                                                                          |
|----|--------------------------------------------------------|-----------------------------------------------------------------------------------------------------------------------------------------------------------------------------------------------------|----------------------------------------------------------------------------------------------------------------------------------------------|---------------------------------------------------------------------|-------------------------------------------------|-----------------------------------|-----------------------------------------------------------------------------------------------------------|-------------------------------------------------------------|-----------------------------------------------------------------------------------------------------------------------------------------------------------------------------------------------------------------------------------------------------------------|--------------------------------------------------------------------------------------------------------------------------------------------------|
| 9  | Alvarez<br>2005<br><br>[9]<br><br>Canada               | I: Betamethasone + Xylocaine<br><br>C: Xylocaine alone<br><br>F&D: One Single Shot                                                                                                                  | A: Not<br>Specified<br><br>D:<br>I: 3.8 (3.9)<br>C: 2.5 (3.1)                                                                                | 91 [77]<br><br>I: 28<br>C: 30                                       | ∅<br><br>I: 50 (15)<br>C: 46 (12)               | 31/27<br><br>I: 14/16<br>C: 17/11 | Neer<br><br>Painful Range<br>of Motion<br><br>Pain on<br>Palpation<br><br>US                              | AROM<br>ASES<br>DASH<br>NEER<br>WORC<br><br>T1/T2/T3/<br>T4 | “That the addition of<br>betamethasone to<br>xylocaine improved<br>patient health-related<br>quality of life or other<br>outcome measures<br>during the following 6<br>months to a greater<br>extent than xylocaine<br>alone.”                                  | It was<br>controlled<br>that the<br>placement<br>of the<br>needle was<br>appropriate<br>(n=10).<br><br>14 excluded<br>(full-thick-<br>ness tear) |
| 10 | Alvarez-<br>Nemegyei<br>2008<br><br>[10]<br><br>Mexico | I: Methylprednisolone + Lidocaine +<br>standard physiotherapy program<br><br>C: Lidocaine alone + standard<br>physiotherapy program<br><br>F&D: One Single Injection                                | A: >18<br><br>D: >7 days<br>I: 8.1 (9.0)<br>C: 3.1 (2.4)                                                                                     | 56 [56]<br><br>I: 27<br>C: 29                                       | ∅<br><br>I: 53 (9)<br>C: 52 (9)                 | 43/13<br><br>I: 19/8<br>C: 24/5   | Neer Injection<br>Test<br><br>Rotator cuff<br>tendinitis as<br>proposed by<br>the<br>Southampton<br>group | AROM<br>Spanish-<br>SDQ<br>VAS<br><br>T3/T4                 | „Methylprednisolone<br>acetate was not more<br>effective than the<br>injection of lidocaine by<br>itself. Could be<br>applicable only to<br>patients who receive<br>NSAIDs and are in a<br>physiotherapy and<br>rehabilitation program as<br>co-interventions.“ | <b>Female: +</b>                                                                                                                                 |
| 11 | Ammer<br>1991<br><br>[11]<br><br>Germany               | I: Pulsed Electromagnetic Field (PEMF)<br><br>C: Sham PEMF<br><br>F&D: 10 Sessions                                                                                                                  | A: Not<br>specified<br><br>D: wks.<br>I: 4 (2-8)<br>C: 8 (2-25)                                                                              | 28 [28]<br><br>I: 12<br>C: 10                                       | ∅<br><br>I: 54 (35-<br>76)<br>C: 64 (35-<br>76) | 12/10<br><br>I: 6/6<br>C: 6/4     | Speed<br>Neer Hawkins<br>Painful Arc<br><br>MRI                                                           | Pain<br>(Likert<br>Scale)<br><br>T1                         | „Therefore superiority of<br>therapy with pulsed<br>magnetic fields could not<br>be proved.“                                                                                                                                                                    |                                                                                                                                                  |
| 12 | Analan<br>2015<br><br>[12]<br><br>Turkey               | I: True US and physiotherapy (combined)<br><br>C: Sham US and physiotherapy (combined)<br><br>F&D: 20 sessions in 4 wks.                                                                            | A: Not<br>Specified<br><br>D:<br>I: 27.5<br>C: 18.1                                                                                          | 22 [22]<br><br>I: 11<br>C: 11                                       | ∅<br><br>I: 52.9<br>(11.1)<br>C: 57.1<br>(15)   | 11/11<br><br>I: 5/6<br>C: 6/5     | Neer<br>Hawkins<br><br>Painful Arc<br>MRI                                                                 | VAS<br>Constant<br>UCLA<br><br>T1                           | „Physiotherapy<br>interventions effectively<br>treat the pain, improve<br>the clinical status, and<br>increase the muscle<br>strength of the shoulder.“                                                                                                         | <b>Unilateral</b><br><br>No data<br>Extractable                                                                                                  |

| ID | Authors<br>Year<br>Reference<br>Country          | INTERVENTION/CONTROLS:<br>I: INTERVENTIONS<br>C: CONTROLS<br>1: GROUP 1<br>2: GROUP 2<br>3: GROUP 3<br>4: GROUP 4<br>5: GROUP 5<br><br>F&D: Frequency of Treatment, Duration of Treatment Period | Clinical Aspects:<br><br>A: Inclusion Age<br>D: Duration of Symptoms (months if not stated otherwise)<br>Co:<br>Comment | N:<br>Included [Randomized]<br><br>Analysed<br>I:<br>C: | Mean age (SD, Range)                         | Female/<br>Male                            | Inclusion based on Test to confirm Diagnosis                                         | Relevant Outcome/<br>Time of assessment | Conclusion of Study-<br>Authors                                                                                                                                                                                                                                            | Remarks                                               |
|----|--------------------------------------------------|--------------------------------------------------------------------------------------------------------------------------------------------------------------------------------------------------|-------------------------------------------------------------------------------------------------------------------------|---------------------------------------------------------|----------------------------------------------|--------------------------------------------|--------------------------------------------------------------------------------------|-----------------------------------------|----------------------------------------------------------------------------------------------------------------------------------------------------------------------------------------------------------------------------------------------------------------------------|-------------------------------------------------------|
| 13 | Arias-Buria<br>2015<br><br>[13]<br><br>Spain     | I: US-guided percutaneous electrolysis + Eccentric training<br><br>C: Eccentric training only<br><br>F&D:<br>I: Once a week for 4 wks. + Home training                                           | A: 18-65<br><br>D: >3<br>I: 11.2 (2.7)<br>C: 10.6 (2.6)                                                                 | 50 [36]<br><br>I: 17<br>C: 19                           | ∅<br><br>I:<br>C:                            | 27/9<br><br>I: 13/4<br>C: 14/5             | Neer Hawkins<br><br>Painful Arc MRI                                                  | NPRS<br>DASH<br><br>T1                  | „US-guided percutaneous electrolysis combined with eccentric exercises resulted in small better outcomes at short term compared to when only eccentric exercises were applied in SAIS.“                                                                                    | <b>Unilateral</b>                                     |
| 14 | Arias-Buria<br>2016<br><br>[14]<br><br>Spain     | I: Trigger Point Dry Needling and exercise<br><br>C: Exercise only<br><br>F&D: 2 Sessions of Dry Needling; exercise program twice daily for 5 wks.                                               | A: 18-65<br><br>D: >3<br>I: 6.2 (1.9)<br>C: 5.8(1.7)                                                                    | 60 [50]<br><br>I: 25<br>C: 25                           | ∅<br><br>I: 48 (6)<br>C: 49 (5)              | 13/37<br><br>I: 6/19<br>C: 7/18            | Neer Hawkins<br>Jobe<br><br>Painful Arc                                              | DASH<br><br>T1/T3/T4/T5                 | „This study found that the inclusion of two sessions of trigger point dry needling into an exercise program was effective for improving shoulder pain-related disability at short-, medium- and long-term; however, no greater improvement in shoulder pain was observed.“ | <b>Unilateral</b>                                     |
| 15 | Atkinson<br>2008<br><br>[15]<br><br>South Africa | I: Chirotherapy, High velocity, low Amplitude<br><br>C: Placebo Laser<br><br>F&D: 6 Visits                                                                                                       | A: Not Specified<br><br>D: Not Specified                                                                                | 68 [65]<br><br>I: 30<br>C: 35                           | ∅<br><br>I: 41.53 (18-63)<br>C: 42.0 (20-70) | 17/43<br><br>I: 8/22<br>C: 9/21            | 3 of 4 Findings: Overhead activity<br>Painful Arc Impingement Test<br>Empty can Test | AROM<br>NRS<br><br>T1                   | „For short term relief of rotator cuff tendinopathy vs. placebo showing an improved algometry, goniometric ROM, and clinically meaningful decrease in the pain.“                                                                                                           | Male: +<br><br>In control group: 5 drop outs replaced |
| 16 | Atya<br>2012<br><br>[16]<br><br>Egypt            | I: Micro Current Electrical Stimulation (MENS)<br><br>C: Placebo MENS<br><br>F&D: 18 Visits, 3 Sessions a week                                                                                   | A: 30-55<br><br>D:<br>I: 5 67 (3.13)<br>C: 6.55 (2.21)                                                                  | 68 [40]<br><br>I: 19<br>C: 21                           | ∅<br><br>I: 48.8 (6.0)<br>C: 49.1 (3.3)      | 21/19<br><br>I: 9/10<br>C: 12/9            | 2 of 4 Tests: Hawkins-Kennedy<br>Neer<br>Painful Arc Resistance Test                 | VAS<br>SDQ<br><br>T1                    | “Suggested that micro current electrical stimulation at the selected parameters could be an effective modality in reducing pain and improving functional disability in patients with SIS.“                                                                                 |                                                       |
| 17 | Aytar<br>2015<br><br>[17]<br><br>Turkey          | 1: Scapular mobilization + Hot Pack + TENS<br>2: Sham scapular mobilization + Hot Pack + TENS<br>3: Supervised exercise + Hot Pack + TENS<br><br>F&D: 9 Visits, 3 Sessions per week              | A: Not Specified<br><br>D: Not Specified                                                                                | 69 [66]<br><br>1: 22<br>2: 22<br>3: 22                  | ∅ 52<br><br>1: 52<br>2: 52<br>3: 51          | 51/15<br><br>1: 18/4<br>2: 14/8<br>3: 19/3 | Hawkins-Kennedy<br>Neer<br>Painful Arc Resistance Test                               | VAS<br>Quick<br>DASH<br><br>T2/T3       | “There was not a significant advantage of scapular mobilization for shoulder function, pain, range of motion, and satisfaction compared with sham or exercise.“                                                                                                            | <b>Female: +</b>                                      |

| ID | Authors<br>Year<br>Reference<br>Country   | INTERVENTION/CONTROLS:<br>I: INTERVENTIONS<br>C: CONTROLS<br>1: GROUP 1<br>2: GROUP 2<br>3: GROUP 3<br>4: GROUP 4<br>5: GROUP 5<br><br>F&D: Frequency of Treatment, Duration of Treatment Period                            | Clinical Aspects:<br><br>A: Inclusion Age<br>D: Duration of Symptoms (months if not stated otherwise)<br>Co:<br>Comment | N:<br>Included [Randomized]<br><br>Analysed<br>I:<br>C: | Mean age (SD, Range)                                    | Female/<br>Male                   | Inclusion based on Test to confirm Diagnosis                                                                                   | Relevant Outcome/<br>Time of assessment | Conclusion of Study-<br>Authors                                                                                                                                                          | Remarks                  |
|----|-------------------------------------------|-----------------------------------------------------------------------------------------------------------------------------------------------------------------------------------------------------------------------------|-------------------------------------------------------------------------------------------------------------------------|---------------------------------------------------------|---------------------------------------------------------|-----------------------------------|--------------------------------------------------------------------------------------------------------------------------------|-----------------------------------------|------------------------------------------------------------------------------------------------------------------------------------------------------------------------------------------|--------------------------|
| 18 | Bae<br>2011<br><br>[18]<br><br>Turkey     | I: Motor Control, Strength + Conservative Physical Therapy<br><br>C: Conservative Physical Therapy<br><br>F&D:<br>I: Same as Control and 30min extra<br>C: 12 Sessions for 45min in 4 wks.                                  | A: Not Specified<br><br>D: Not Specified                                                                                | 35 [35]<br><br>I: 17<br>C: 18                           | Ø<br><br>I: 49.9 (5.5)<br>C: 48.3 (4.3)                 | 23/12<br><br>I: 11/6<br>C: 12/6   | Hawkins-Kennedy<br>Jobe<br>Neer<br><br>Painful Arc<br>Resistance<br>Test                                                       | AROM<br>SPADI<br><br>T1                 | “Motor control and strengthening exercise program improved pain, function, strength and the range of motion.”                                                                            | Female: +                |
| 19 | Bal<br>2009<br><br>[19]<br><br>Turkey     | I: Low Level Laser + Hot/Cold Pack Therapy + Exercise<br><br>C: Hot /Cold Pack Therapy + Exercise alone<br><br>F&D: 10 Sessions Laser + 12 wks.<br>Comprehensive Home Exercise                                              | A: 18-70<br><br>D: 6 wks. - 6 mos.                                                                                      | 44 [44]<br><br>I: 22<br>C: 22                           | Ø<br><br>I: 51.7 (14.1)<br>C: 53.1 (8.4)                | 28/12<br><br>I: 15/5<br>C: 13/7   | Hawkins-Kennedy<br>Neer<br>Painful range of motion<br>Injection Test                                                           | SPADI<br>UCLA<br>VAS<br><br>T1          | „Failed to show a distinct advantage of low level laser (LLLT) over exercise alone.“                                                                                                     | Female: +                |
| 20 | Bang<br>2000<br><br>[20]<br><br>USA       | I: Manual therapy + Exercise<br><br>C: Exercise<br><br>F&D: Twice weekly for 3 wks.                                                                                                                                         | A: 18–65<br><br>D:<br>I: 5.6 (3.7)<br>C: 44.4 (2.8)                                                                     | 52 [52]<br><br>I: 27<br>C: 23                           | Ø<br><br>I: 42 (10.1)<br>C: 45 (8.4)                    | 22/30<br><br>I: 10/18<br>C: 12/12 | 1 of the 2<br>Tests:<br>Active shoulder<br>abduction<br>Resisted Tests                                                         | Pain<br>composite<br>score<br><br>T3    | „Manual physical therapy combined with supervised shoulder exercise is superior. Provides evidence that effective outcomes are attainable after relatively few physical therapy visits.“ |                          |
| 21 | Bansal<br>2011<br><br>[21]<br><br>India   | I: Therapeutic Ultrasound (pulsed mode)<br><br>C: Deep Friction Massage<br><br>F&D: 10 Sessions within 10 Days and<br>Codman Exercises                                                                                      | A: Not Specified<br><br>D: Not Specified                                                                                | 40 [40]<br><br>I: 20<br>C: 20                           | Ø<br><br>I: 30.35 (5.76)<br>C: 30.90 (5.33)             | 19/21<br><br>I: 11/9<br>C: 8/12   | Painful Arc<br>Empty can Test                                                                                                  | AROM<br>VAS<br><br>T1                   | “Both the interventions reduce pain and increase Abduction AROM but DFM has slight edge over US.“                                                                                        |                          |
| 22 | Barbosa<br>2008<br><br>[22]<br><br>Brasil | I: Therapeutic Ultrasound, eccentric Muscle Training + Joint Mobilization for the Accessory Movements of the Shoulder<br><br>C: Therapeutic Ultrasound + eccentric Training<br><br>F&D: 10 Sessions with 3 Sessions per wk. | A: Not Specified<br><br>D: >6                                                                                           | 14 [14]<br><br>I: 7<br>C: 7                             | Ø 46.1 (7.62)<br><br>I: 43.52 (7.59)<br>C: 48.71 (7.27) | 9/5<br><br>I: 4/3<br>C: 5/2       | One or more<br>special tests for<br>detecting<br>shoulder<br>dysfunction:<br>Pain on<br>Palpation<br>Jobe<br>Speed<br>Yergason | Constant<br>DASH<br><br>T1              | „The associated use of joint mobilization seemed to offer better functional results.“                                                                                                    | Small<br>Sample<br>Study |

| ID | Authors<br>Year<br>Reference<br>Country       | INTERVENTION/CONTROLS:<br>I: INTERVENTIONS<br>C: CONTROLS<br>1: GROUP 1<br>2: GROUP 2<br>3: GROUP 3<br>4: GROUP 4<br>5: GROUP 5<br><br>F&D: Frequency of Treatment, Duration of Treatment Period                                                                                                                 | Clinical Aspects:<br><br>A: Inclusion Age<br>D: Duration of Symptoms (months if not stated otherwise)<br>Co:<br>Comment | N:<br>Included [Randomized]<br><br>Analysed :<br>I:<br>C: | Mean age (SD, Range)                                                 | Female/<br>Male                                 | Inclusion based on Test to confirm Diagnosis | Relevant Outcome/<br>Time of assessment | Conclusion of Study-<br>Authors                                                                                                                          | Remarks            |
|----|-----------------------------------------------|------------------------------------------------------------------------------------------------------------------------------------------------------------------------------------------------------------------------------------------------------------------------------------------------------------------|-------------------------------------------------------------------------------------------------------------------------|-----------------------------------------------------------|----------------------------------------------------------------------|-------------------------------------------------|----------------------------------------------|-----------------------------------------|----------------------------------------------------------------------------------------------------------------------------------------------------------|--------------------|
| 23 | Barra Lopez<br>2011<br><br>[23]<br><br>Spain  | 1: Diacutaneous Fibrolysis + Therapeutic Exercises + Electrotherapy + Cryotherapy<br><br>2: Sham Diacutaneous Fibrolysis + Therapeutic Exercises + Electrotherapy + Cryotherapy<br><br>F&D: Single Sessions                                                                                                      | A: >18<br><br>D:<br>1. 14.5 (16.2)<br>2. 17.9 (27.6)<br><br>Co: Pilot study                                             | 50 [50]<br><br>1: 25<br>2: 25                             | Ø<br><br>1. 56.8 (10.3)<br>2. 60.8 (10.1)                            | 29/21<br><br>1: 16/9<br>2: 13/12                | Hawkins–Kennedy<br>Neer<br>Yergason          | AROM<br>Constant<br>VAS<br><br>T1       | „Diacutaneous Fibrolysis may be an effective and safe therapeutic option to improve active range of motion in patients suffering from painful shoulder.“ | “A few had trauma” |
| 24 | Barra Lopez.<br>2013<br><br>[24]<br><br>Spain | 1: Diacutaneous Fibrolysis (DF) + Therapeutic Exercises + Electrotherapy + Cryotherapy<br>2: Therapeutic Exercises + Electrotherapy + Cryotherapy<br>3: Sham Diacutaneous Fibrolysis + Therapeutic Exercises + Electrotherapy + Cryotherapy<br><br>F&D: 5 Sessions per Week for 3 wks.; 6 Sessions (2/wk.) of DF | A: >18<br><br>D:<br>1. 17.4 (24.9)<br>2. 24.2 (59.1)<br>3. 14.7 (21.6)                                                  | 147 [120]<br><br>1: 40<br>2. 40<br>3. 40                  | Ø<br><br>1. 56.2 (12.0)<br>2. 60.0 (10.0)<br>3. 59.1 (11.5)          | 75/45<br><br>1: 25/15<br>2.: 27/13<br>3.: 23/17 | Hawkins–Kennedy<br>Neer<br>Yergason          | AROM<br>Constant<br>VAS<br><br>T1/T3    | „Hypothesis that Diacutaneous Fibrolysis treatment adds a positive effect to conventional Physiotherapeutic treatment of SAIS.“                          | <b>Female: +</b>   |
| 25 | Barra Lopez<br>2015<br><br>[25]<br><br>Spain  | 1: Functional Massage Group<br>2: Passive Mobilisation<br><br>F&D: Daily sessions for three weeks Including exercise, electro and cryotherapy                                                                                                                                                                    | A: >18<br><br>D:<br>I: 15.05<br>C: 12.37                                                                                | 43 [38]<br><br>1: 23<br>2: 20                             | Ø<br><br>1: 56.37 (10.61)<br>2: 59.84 (12.08)                        | 26/12<br><br>1: 10/9<br>2: 16/3                 | Hawkins–Kennedy<br>Neer                      | AROM<br>Constant<br>VAS<br><br>T1       | “Functional Massage of trigger points in teres major muscle provides better clinical outcomes than passive mobilization towards the muscle stretch.“     | <b>Female: +</b>   |
| 26 | Baskurt<br>2006<br><br>[26]<br><br>Turkey     | 1: Heat<br>2: TENS<br>3: Heat + TENS<br><br>F&D: Heat for 20 min., TENS for 20 min.                                                                                                                                                                                                                              | A: Not Specified<br><br>D: Not Specified                                                                                | 92 [92]<br><br>1: 31<br>2: 30<br>3: 31                    | Ø 56.9<br><br>1: 56.54 (9.99)<br>2: 57.10 (4.43)<br>3: 57.32 (10.61) | 60/32<br><br>1: 22/9<br>2: 20/10<br>3: 18/13    | Stage I                                      | PPT<br>VAS<br><br>T1                    | “No statistically significant difference was found in VAS scores before and immediately after the application among the groups.”                         | <b>Female: +</b>   |

| ID | Authors<br>Year<br>Reference<br>Country      | INTERVENTION/CONTROLS:<br>I: INTERVENTIONS<br>C: CONTROLS<br>1: GROUP 1<br>2: GROUP 2<br>3: GROUP 3<br>4: GROUP 4<br>5: GROUP 5<br><br>F&D: Frequency of Treatment, Duration of Treatment Period | Clinical Aspects:<br><br>A: Inclusion Age<br>D: Duration of Symptoms (months if not stated otherwise)<br>Co:<br>Comment | N: Included [Randomized]<br><br>Analysed :<br>I:<br>C:            | Mean age (SD, Range)                        | Female/<br>Male                   | Inclusion based on Test to confirm Diagnosis                                               | Relevant Outcome/<br>Time of assessment | Conclusion of Study-<br>Authors                                                                                                                                                                           | Remarks                                                           |
|----|----------------------------------------------|--------------------------------------------------------------------------------------------------------------------------------------------------------------------------------------------------|-------------------------------------------------------------------------------------------------------------------------|-------------------------------------------------------------------|---------------------------------------------|-----------------------------------|--------------------------------------------------------------------------------------------|-----------------------------------------|-----------------------------------------------------------------------------------------------------------------------------------------------------------------------------------------------------------|-------------------------------------------------------------------|
| 27 | Baskurt<br>2011<br><br>[27]<br><br>Turkey    | 1: Stretching + Strengthening<br><br>2: Stretching + Strengthening + „Scapular Stabilization“<br><br>F&D: 18 Sessions in 6 wks.                                                                  | A: Not Specified<br><br>D:<br>I: 11.60 (9.52)<br>C: 8.55 (10.78)                                                        | 40 [40]<br><br>1: 20<br>2: 20                                     | ∅<br><br>1: 51.25 (11.55)<br>2: 51.50 (8.4) | 27/13                             | Hawkins–Kennedy<br>Neer<br>Jobe<br><br>US                                                  | AROM<br>WORC<br>VAS<br><br>T1           | “Scapular stabilization exercises, given with stretching and strengthening exercises can be more effective in increasing the muscle strength, developing the JPS and decreasing the scapular dyskinesia.” | <b>Female: +</b>                                                  |
| 28 | Bayram<br>2014<br><br>[28]<br><br>Turkey     | I: Nerve Block with 9 ml. of 2 % Prilocaine + 1 ml. of 40 mg Triamcinolone acetate<br><br>C: Placebo Injection<br><br>F&D: One Single Shot                                                       | A: >18<br><br>D: >3<br>I: 8.8 (9.8)<br>C: 9.7 (9.5)                                                                     | 96 [96]<br><br>I: 38<br>C: 36                                     | ∅<br><br>I: 53.2 (11.8)<br>C: 53.2 (10.5)   | 27/69<br><br>I: 16/35<br>C: 11/34 | Painful Range of Motion<br><br>MRI:<br>Zlatkin's                                           | VAS<br>AROM<br>Constant<br><br>T1/T3    | „Suprascapular nerve block (SSNB) is an effective treatment modality for the patients with chronic shoulder pain form impingement syndrome.“                                                              | Male: +<br><br><b>Unilateral</b>                                  |
| 29 | Beaudreuil<br>2011<br><br>[29]<br><br>France | I: Dynamic Humeral Centring (DHC)<br><br>C: Non-specific Mobilization Program<br><br>F&D: 15 Sessions for 6 wks.                                                                                 | A: >30<br><br>D: >1<br>I: 35.7 (81.6)<br>C: 20.9 (27.6)                                                                 | 149 [70]<br><br>I: 35<br>C: 35<br><br>At 3 mos:<br>I: 30<br>C: 32 | ∅<br><br>I: 57.9 (10.7)<br>C: 59.4 (10.0)   | 47/22<br><br>I: 21/13<br>C: 26/9  | At least two positive tests:<br>Hawkins-Kennedy<br>Neer<br>Yocum<br><br>Constant score <80 | Constant<br><br>T2/T5                   | „There was no difference in the total Constant score between DHC and controls.“                                                                                                                           | <b>Female: +</b>                                                  |
| 30 | Beaudreuil<br>2013<br><br>[30]<br><br>France | I: Dynamic humeral Centring (DHC)<br><br>C: Non-specific Mobilization Program<br><br>F&D: 15 Sessions for 6 wks.                                                                                 | A: >30<br><br>D: >1<br>I: 35.7 (81.6)<br>C: 20.9 (27.6)                                                                 | 69 [69]<br><br>I: 34<br>C: 35<br><br>At 3 mos:<br>I: 30<br>C: 32  | ∅<br><br>I: 57.9 (10.7)<br>C: 59.4 (10.0)   | 47/22<br><br>I: 21/13<br>C: 26/9  | At least two positive Tests:<br>Hawkins–Kennedy<br>Neer<br>Yocum<br><br>Constant Score <80 | AROM<br><br>T2                          | „Dynamic humeral centring is an effective modality of physiotherapy.“                                                                                                                                     | <b>Female: +</b><br><br>Secondary analysis from Beaudreuil (2011) |

| ID | Authors<br>Year<br>Reference<br>Country         | INTERVENTION/CONTROLS:<br>I: INTERVENTIONS<br>C: CONTROLS<br>1: GROUP 1<br>2: GROUP 2<br>3: GROUP 3<br>4: GROUP 4<br>5: GROUP 5<br><br>F&D: Frequency of Treatment, Duration of Treatment Period                                                                                                                                                                                         | Clinical Aspects:<br><br>A: Inclusion Age<br>D: Duration of Symptoms (months if not stated otherwise)<br>Co:<br>Comment | N:<br>Included [Randomized]<br><br>Analysed<br>I:<br>C: | Mean age (SD, Range)                                                                            | Female/<br>Male                                             | Inclusion based on Test to confirm Diagnosis                             | Relevant Outcome/<br>Time of assessment   | Conclusion of Study-<br>Authors                                                                                                                                                                                              | Remarks             |
|----|-------------------------------------------------|------------------------------------------------------------------------------------------------------------------------------------------------------------------------------------------------------------------------------------------------------------------------------------------------------------------------------------------------------------------------------------------|-------------------------------------------------------------------------------------------------------------------------|---------------------------------------------------------|-------------------------------------------------------------------------------------------------|-------------------------------------------------------------|--------------------------------------------------------------------------|-------------------------------------------|------------------------------------------------------------------------------------------------------------------------------------------------------------------------------------------------------------------------------|---------------------|
| 31 | Bennell<br>2010<br><br>[31]<br><br>Australia    | I: Manual Therapy + Home Exercises<br><br>C: Sham Ultrasound Therapy + Light Application of a non-therapeutic Gel to the shoulder region for 10 minutes each. No Instruction in Exercise Techniques and no Manual Therapy<br><br>F&D: "10 Visits, 30-45 min. each twice weekly for the first fortnight, once a week for the next four wks., then once a fortnight in the last four wks." | A: >18<br><br>D: >3<br><br>I: 24 (6-54)<br>C: 14 (6-24)                                                                 | 438 [120]<br><br>I: 59<br>C: 61                         | ∅<br><br>I: 59.3 (10.1)<br>C: 60.8 (12.4)                                                       | 56/64<br><br>I: 25/34<br>C: 31/30                           | Positive quick Test<br><br>Pain on active abduction or external rotation | SPADI<br>VAS<br><br>T1/T3                 | „Particular manual therapy and home exercise program tested conferred no additional benefit immediately after treatment compared with a realistic placebo in middle aged to older adults with chronic rotator cuff disease.“ |                     |
| 32 | Berry<br>1980<br><br>[32]<br><br>Great Britain  | 1: Acupuncture<br>2: Steroid (40 mg prednisolone) Injection + Placebo Tolmetin Sodium<br>3: Steroid (40 mg prednisolone) Injection + active Tolmetin Sodium<br>4: Ultrasound<br>5: Placebo Ultrasound + Placebo Tolmetin Sodium<br><br>F&D: Tolmetin Sodium (NSAID)<br>1: Once a week for 4 wks.                                                                                         | A: Not Specified<br><br>D: wks<br>1: 20.3 (16.9)<br>2: 23.6 (27.9)<br>3: 28.3 (15.2)<br>4: 16.3 (14.5)<br>5: 27.5 (35)  | 60 [60]<br><br>In each group: 12                        | ∅<br><br>1: 52.3 (10.8)<br>2: 54.1 (16.7)<br>3: 51.2 (14.6)<br>4: 55.1 (12.7)<br>5: 56.2 (11.2) | 31/29<br><br>1: 4/8<br>2: 6/6<br>3: 8/4<br>4: 7/5<br>5: 6/6 | Painful Arc<br><br>Painful stiff but not frozen shoulders.               | AROM<br>VAS<br><br>T1                     | “There does not seem to be any definite advantage of any particular treatment for the painful shoulder.”                                                                                                                     |                     |
| 33 | Bialoszewski<br>2011<br><br>[33]<br><br>Poland  | I: Manual Therapy + TENS, US + Physiotherapy<br><br>C: TENS + US + Physiotherapy<br><br>F&D: 10 Sessions in 2 wks.                                                                                                                                                                                                                                                                       | A: Not Specified<br><br>D:<br>4.6 (2-9)<br>I: 4.8<br>C: 4.4                                                             | 30 [30]<br><br>I: 15<br>C: 15                           | ∅<br><br>51.3 (38-61)<br>I: 52.6 (38-61)<br>C: 50 (38-60)                                       | 12/18<br><br>I: 5/10<br>C: 7/8                              | Confirmed chronic rotator cuff injury<br>Painful Arc                     | AROM<br>VAS<br><br>T1                     | “Inclusion of manual therapy in the standard comprehensive physiotherapy used in the rehabilitation of patients with chronic rotator cuff injuries significantly improves treatment effectiveness.”                          |                     |
| 34 | Binder<br>1984<br><br>[34]<br><br>Great Britain | I: Pulsed electromagnetic field therapy (active coils)<br><br>C: Placebo (dummy coils)<br><br>F&D:<br>I: 5-9 hours/d.<br>C: One Sessions lasted one hour.                                                                                                                                                                                                                                | A: Not Specified<br><br>D: >3<br>I: 9.2 (3-24)<br>C: 9.5 (3-24)                                                         | 29 [29]<br><br>I: 15<br>C: 14                           | ∅<br><br>I: 54.4<br>C: 53.2                                                                     | 8/21<br><br>I: 5/10<br>C: 3/11                              | Painful Arc<br><br>According to Cyriax                                   | AROM<br>VAS<br><br>Time:<br>Not Specified | “PEMF therapy may thus be useful in the treatment of severe and persistent rotator cuff.”                                                                                                                                    | No data Extractable |



| ID | Authors<br>Year<br>Reference<br>Country                 | INTERVENTION/CONTROLS:<br>I: INTERVENTIONS<br>C: CONTROLS<br>1: GROUP 1<br>2: GROUP 2<br>3: GROUP 3<br>4: GROUP 4<br>5: GROUP 5<br><br>F&D: Frequency of Treatment, Duration of Treatment Period                                          | Clinical Aspects:<br><br>A: Inclusion Age<br>D: Duration of Symptoms (months if not stated otherwise)<br>Co:<br>Comment | N: Included [Randomized]<br><br>Analysed :<br>I:<br>C:           | Mean age (SD, Range)                                         | Female/Male                       | Inclusion based on Test to confirm Diagnosis                                           | Relevant Outcome/ Time of assessment                                         | Conclusion of Study- Authors                                                                                              | Remarks                                                                                                                                      |
|----|---------------------------------------------------------|-------------------------------------------------------------------------------------------------------------------------------------------------------------------------------------------------------------------------------------------|-------------------------------------------------------------------------------------------------------------------------|------------------------------------------------------------------|--------------------------------------------------------------|-----------------------------------|----------------------------------------------------------------------------------------|------------------------------------------------------------------------------|---------------------------------------------------------------------------------------------------------------------------|----------------------------------------------------------------------------------------------------------------------------------------------|
| 35 | Bjornsson<br>Hallgren<br>2014<br><br>[35]<br><br>Sweden | I: Specific Exercise<br><br>C: Unspecific Exercises<br><br>After 3 mos.: Whether they still wanted surgery<br><br>F&D: 7 Sessions<br>Weekly for both groups during the first 2 weeks and then every other week over the following 10 wks. | A: Not Specified<br><br>D: >6<br>I: 24 (6–120)<br>C: 12 (6–156)                                                         | 97 [97]<br><br>I: 51<br>C: 46<br><br>At 1 yr.:<br>I: 45<br>C: 50 | Ø<br><br>I: 52 (33–65)<br>C: 52 (37–65)                      | 36/61<br><br>I: 14/37<br>C: 22/24 | 3 positive Criteria:<br>Hawkins-Kennedy<br>Jobe<br>Neer<br>Patte<br><br>Injection Test | Constant<br>DASH<br>VAS<br><br>T3                                            | „Specific exercises reduced the need for surgery for subacromial pain. Results are maintained after 1 year.“              | Same study as Holmgren (2012)<br><br>Male: +<br><br>Patients were offered surgery after 3 months. Therefore we take the values for 12 weeks. |
| 36 | Blair<br>1996<br><br>[36]<br><br>Sweden                 | I: Triamcinolone acetonide + Lidocaine without Epinephrine<br><br>C: Lidocaine without Epinephrine<br><br>F&D: One Single Injection                                                                                                       | A: Not Specified<br><br>D: >3<br>I: 8 m (3–24)<br>C: 8 m (3–22)                                                         | 40 [40]<br><br>I: 19<br>C: 21                                    | Ø<br><br>I: 56 (32–80)<br>C: 57 (33–81)                      | 32/8<br><br>I: 15/4<br>C: 17/4    | Lidocaine Injection Test                                                               | AROM<br>VAS<br><br>T not clear:<br>In weeks<br>I: 28 (12–52)<br>C: 33(12–55) | „Such injections are effective in the short term for alleviating pain and improving the range of motion of the shoulder.“ | No data Extractable                                                                                                                          |
| 37 | Blume<br>2015<br><br>[37]<br><br>USA                    | I: Eccentric progressive resistance exercise (PRE)<br><br>C: Concentric progressive resistance exercise<br><br>F&D: 20 Sessions for 6 wks.                                                                                                | A: >18<br><br>D:<br>I: 28.2 (23.6)<br>C: 20.6 (26.6)                                                                    | 55 [38]<br><br>I: 18<br>C: 20                                    | Ø:<br><br>I: 50.1 (16.9)<br>C: 48.6 (14.6)                   | 20/14<br><br>I: 10/8<br>C: 10/6   | 3 positive tests:<br>Hawkins-Kennedy<br>Neer<br>ADD-Test                               | AROM<br>Constant<br>UCLA<br><br>T1                                           | „Both eccentric and concentric PRE programs resulted in improved function, AROM, and strength in patients with SAIS.“     | Some tests used to rule out RC tears (excluded)                                                                                              |
| 38 | Boeck<br>2012<br><br>[38]<br><br>Brasil                 | I: Exercises in Closed Kinetic Chain<br><br>C: Exercises in Open Kinetic Chain<br><br>F&D: 20 Sessions for 6 wks.                                                                                                                         | A: Not Specified<br><br>D: Not Specified                                                                                | 20 [14]<br><br>I: 7<br>C: 7                                      | Ø: 55.57 (11.85)<br><br>I: 54.71 (12.84)<br>C: 56.43 (11.74) | 13/1<br><br>I: 7/0<br>C: 6/1      | 3 positive tests:<br>Hawkins-Kennedy<br>Jobe<br>Neer<br>Yocum<br><br>MRI (stage I/II)  | DASH<br>AROM<br><br>T1                                                       | „Closed kinetic chain exercises have major improvements in mobility, functionality and strength.“                         | Small Sample Study<br><br>For AROM: No data Extractable                                                                                      |

| ID | Authors<br>Year<br>Reference<br>Country     | INTERVENTION/CONTROLS:<br>I: INTERVENTIONS<br>C: CONTROLS<br>1: GROUP 1<br>2: GROUP 2<br>3: GROUP 3<br>4: GROUP 4<br>5: GROUP 5<br><br>F&D: Frequency of Treatment, Duration<br>of Treatment Period | Clinical<br>Aspects:<br><br>A: Inclusion<br>Age<br>D: Duration<br>of<br>Symptoms<br>(months if<br>not stated<br>otherwise)<br>Co:<br>Comment | N:<br>Included<br>[Random<br>ized]<br><br>Analysed<br>:<br>I:<br>C: | Mean<br>age (SD,<br>Range)                                           | Female/<br>Male                               | Inclusion<br>based on Test<br>to confirm<br>Diagnosis    | Relevant<br>Outcome/<br>Time of<br>assessment | Conclusion of Study-<br>Authors                                                                                                                                                                                                                                                                                                                          | Remarks                                       |
|----|---------------------------------------------|-----------------------------------------------------------------------------------------------------------------------------------------------------------------------------------------------------|----------------------------------------------------------------------------------------------------------------------------------------------|---------------------------------------------------------------------|----------------------------------------------------------------------|-----------------------------------------------|----------------------------------------------------------|-----------------------------------------------|----------------------------------------------------------------------------------------------------------------------------------------------------------------------------------------------------------------------------------------------------------------------------------------------------------------------------------------------------------|-----------------------------------------------|
| 39 | Bron<br>2011<br><br>[39]<br><br>Netherlands | I: Comprehensive Treatment of Muscle<br>Trigger Points (MTrPt) in Shoulder Muscles<br><br>C: A Wait-and-See Approach<br><br>F&D: 12 Sessions once weekly for a<br>maximum of 12 wks.                | A: 18-65<br><br>D: >6                                                                                                                        | 75 [72]<br><br>I: 37<br>C: 35<br><br>ITT<br>I: 34<br>C: 31          | Ø<br><br>I: 42.8<br>(11.7)<br>C: 45.0<br>(13.2)                      | 44/21<br><br>I: 21/13<br>C: 23/8              | Only mentioned<br>in the<br>introduction                 | DASH<br>VAS<br><br>T1                         | „Intervention group had<br>better outcomes on all<br>outcome measures after<br>12 weeks of a<br>comprehensive MTrPt<br>treatment program than<br>did those on the waiting<br>list. Justifies a search for<br>an alternative<br>explanation of shoulder<br>pain, regardless of<br>whether the patient is<br>diagnosed with SIS.”                          | <b>Female: +</b><br><br><b>Unilateral</b>     |
| 40 | Brox<br>1993<br><br>[40]<br><br>Norway      | 1: Surgery + Exercise<br><br>2: Supervised Exercise<br><br>3: Detuned Laser<br><br>F&D: 12 Sessions, twice weekly for 6 wks.                                                                        | A: 18-66<br><br>D: >3                                                                                                                        | 195 [125]<br><br>ITT<br>I: 45 (13)<br>2: 50<br>3: 30 (8)            | Ø<br><br>1: 48<br>2: 47<br>3: 48<br>3: 2                             | 59/79<br><br>I: 16/29<br>2: 15/30<br>3: 28/20 | 2 of 3 isometric<br>Tests positive<br><br>Injection Test | VAS<br><br>T1/T3                              | „After six months both<br>active treatments were<br>significantly better than<br>placebo in reducing pain<br>and improving function,<br>but neither was<br>significantly better than<br>the other.“                                                                                                                                                      | No data<br>Extractable                        |
| 41 | Brox<br>1999<br><br>[41]<br><br>Norway      | 1: Surgery + Exercise<br><br>2: Supervised Exercises<br><br>3: Detuned Laser<br><br>F&D: 12 Sessions, twice weekly for 6 wks.                                                                       | A: 18-66<br><br>D: >3                                                                                                                        | 195 [125]<br><br>I: 39<br>2: 45<br>3: 29                            | Ø<br><br>1: 48 (26-<br>66)<br>2: 47 (23<br>-65)<br>3: 48 (24-<br>65) | 59/79<br><br>I: 16/29<br>2: 15/30<br>3: 28/20 | 2 of 3 isometric<br>Tests positive<br><br>Injection Test | NEER<br>score<br>VAS<br><br>T6<br>(>2 yrs.)   | „After 2 1/2-years of<br>follow-up, both<br>arthroscopic surgery and<br>supervised exercises are<br>better treatments than<br>placebo. Patients who do<br>not improve on a<br>supervised exercise<br>regimen should be<br>considered for surgery,<br>but the prognosis is poor<br>in patients receiving<br>regular pain medication<br>or on sick leave.“ | Data<br>extracted for<br>longest<br>follow-up |

| ID | Authors<br>Year<br>Reference<br>Country     | INTERVENTION/CONTROLS:<br>I: INTERVENTIONS<br>C: CONTROLS<br>1: GROUP 1<br>2: GROUP 2<br>3: GROUP 3<br>4: GROUP 4<br>5: GROUP 5<br><br>F&D: Frequency of Treatment, Duration<br>of Treatment Period                                                                         | Clinical<br>Aspects:<br><br>A: Inclusion<br>Age<br>D: Duration<br>of<br>Symptoms<br>(months if<br>not stated<br>otherwise)<br>Co:<br>Comment | N:<br>Included<br>[Random<br>ized]<br><br>Analysed<br>:<br>I:<br>C: | Mean<br>age (SD,<br>Range)                                                         | Female/<br>Male                            | Inclusion<br>based on Test<br>to confirm<br>Diagnosis                                             | Relevant<br>Outcome/<br>Time of<br>assessment | Conclusion of Study-<br>Authors                                                                                                                                                                 | Remarks                |
|----|---------------------------------------------|-----------------------------------------------------------------------------------------------------------------------------------------------------------------------------------------------------------------------------------------------------------------------------|----------------------------------------------------------------------------------------------------------------------------------------------|---------------------------------------------------------------------|------------------------------------------------------------------------------------|--------------------------------------------|---------------------------------------------------------------------------------------------------|-----------------------------------------------|-------------------------------------------------------------------------------------------------------------------------------------------------------------------------------------------------|------------------------|
| 42 | Byun<br>2011<br><br>[42]<br><br>South Korea | I: Triamcinolone acetone + Lidocaine +<br>Hyaluronate<br><br>C: Triamcinolone acetone + Lidocaine<br><br>F&D: Once weekly for 3 wks.                                                                                                                                        | A: Not<br>Specified<br><br>D: Not<br>Specified<br><br>Co:<br>Comment                                                                         | 26 [26]<br><br>I: 13<br>C: 13                                       | Ø: 55.4<br>(10.9)<br><br>I: 55.5<br>(12.1)<br>C: 55.4<br>(10:0)                    | 20/6<br><br>I: 10/3<br>C: 10/3             | Hawkins–<br>Kennedy<br>Neer<br><br>Painful Arc<br><br>US                                          | AROM<br>SDQ<br>SFA<br>VAS<br><br>T1           | „There is an additive<br>effectiveness in<br>improving shoulder<br>movement and function,<br>including active internal<br>rotation when<br>Hyaluronate are used<br>adjunctively with steroid.“  | <b>Female: +</b>       |
| 43 | Byun<br>2014<br><br>[43]<br><br>South Korea | 1: injection of triamcinolone and lidocaine<br>2: 2 injections of triamcinolone and<br>lidocaine, two wks. apart<br>3: 2 injections of triamcinolone and<br>lidocaine, one week apart<br><br>F&D: 40 mg (1.0 mL) of triamcinolone and<br>5.0 mL 0.5% lidocaine (total 6 mL) | A: Not<br>Specified<br><br>D: Not<br>Specified<br><br>Co: Full<br>thickness<br>tears                                                         | 26 [30]<br><br>1: 10<br>2: 10<br>3: 10                              | Ø: 55.4<br>(10.9)<br><br>1: 63.3<br>(10.0)<br>2: 63.9<br>(8.0)<br>3: 60.2<br>(7.9) | 14/16<br><br>1: 5/5<br>2: 4/6<br>3: 5/5    | Hawkins–<br>Kennedy<br>Neer<br><br>Painful Arc<br><br>US                                          | AROM<br>SDQ<br>VAS<br><br>T1/T2               | „It may be more effective<br>in pain relief for patients<br>with periarticular disorder<br>to receive subacromial<br>bursa injections twice with<br>2-wk interval, as opposed<br>to once.“      | No data<br>Extractable |
| 44 | Calis<br>2011<br><br>[44]<br><br>Turkey     | 1: Moist Heat + US + Exercise<br>2: Moist Heat + Laser + Exercise<br>3: Moist Heat + Exercise<br><br>F&D: 15 Sessions for 3 wks.                                                                                                                                            | A: 18–65<br><br>D:<br>1: 3 (1-12)<br>2: 3 (1-24)<br>3: 3 (1-24)                                                                              | 52 [52]<br><br>1: 21<br>2: 15<br>3: 16                              | Ø<br><br>1: 55.42<br>(12.4)<br>2: 46.2<br>(12.14)<br>3: 50.34<br>(13.69)           | 35/17<br><br>1: 14/7<br>2: 10/5<br>3: 11/5 | Diagnostic test<br>for SIS were<br>applied.<br><br>MRI:<br>Stage 2<br>(according to<br>Zlatkin's) | AROM<br>Constant<br>VAS<br><br>T1             | „Laser and ultrasound<br>could not be found<br>superior to each other in<br>the treatment of SIS.<br>Exercise treatment forms<br>the base for the<br>conservative treatment.“                   | <b>Female: +</b>       |
| 45 | Camargo<br>2015<br><br>[45]<br><br>Brazil   | I: Exercise + manual therapy<br><br>C: Exercise alone<br><br>F&D: 4 wks.                                                                                                                                                                                                    | A: 18–65<br><br>D:<br>I: 47.1 (57.82)<br>C: 38.4 (51.1)                                                                                      | 93 [46]<br><br>I: 23<br>C: 23                                       | Ø<br><br>I: 35.9<br>(12.08)<br>C: 32.6<br>(10.73)                                  | 22/24<br><br>I: 13/10<br>C: 9/14           | Hawkin's<br>Kennedy<br>Jobe<br>Neer<br>Resisted tests<br><br>Painful arc                          | AROM<br>DASH<br>VAS<br><br>T1                 | „Adding manual therapy<br>to an exercise protocol<br>did not enhance<br>improvements in scapular<br>kinematics, function, and<br>pain in individuals with<br>shoulder impingement<br>syndrome.“ |                        |

| ID | Authors<br>Year<br>Reference<br>Country        | INTERVENTION/CONTROLS:<br>I: INTERVENTIONS<br>C: CONTROLS<br>1: GROUP 1<br>2: GROUP 2<br>3: GROUP 3<br>4: GROUP 4<br>5: GROUP 5<br><br>F&D: Frequency of Treatment, Duration of Treatment Period            | Clinical Aspects:<br><br>A: Inclusion Age<br>D: Duration of Symptoms (months if not stated otherwise)<br>Co:<br>Comment | N: Included [Randomized]<br><br>Analysed :<br>I:<br>C: | Mean age (SD, Range)                                   | Female/Male                     | Inclusion based on Test to confirm Diagnosis                                     | Relevant Outcome/ Time of assessment | Conclusion of Study- Authors                                                                                                                                                                                                                | Remarks                |
|----|------------------------------------------------|-------------------------------------------------------------------------------------------------------------------------------------------------------------------------------------------------------------|-------------------------------------------------------------------------------------------------------------------------|--------------------------------------------------------|--------------------------------------------------------|---------------------------------|----------------------------------------------------------------------------------|--------------------------------------|---------------------------------------------------------------------------------------------------------------------------------------------------------------------------------------------------------------------------------------------|------------------------|
| 46 | Celik<br>2009<br><br>[46]<br><br>Turkey        | I: Exercise based on Shoulder Flexion below 90° of Abduction + Ice + TENS + US<br><br>C: Exercise based on Shoulder Flexion Exercise over 90° Abduction + Ice + TENS + US<br><br>F&D: 10 Sessions in 2 wks. | A: Not Specified<br><br>D: >6                                                                                           | 30 [30]<br><br>I: 17/15<br>C: 16/15                    | Ø 52                                                   | 23/7                            | Hawkins– Kennedy<br>Neer<br>Jobe                                                 | VAS<br>Constant<br><br>T1/T4         | “The exercise program below 90 degrees (painfree range of motion) resulted in additional improvements in VAS and face scores in SIS.”                                                                                                       | <b>Female: +</b>       |
| 47 | Celik<br>2009<br><br>[47]<br><br>Turkey        | I: 9 ml Bupivacaine + 1 ml Betamethasone + Exercise + TENS + Ice + US<br><br>C: Exercise + TENS + Ice + US<br><br>F&D: 15 Sessions for 3 wks.                                                               | A: 30-70<br><br>D: >6                                                                                                   | 56 [56]<br><br>I: 28<br>C: 28                          | Ø 50 (31-68)<br><br>I: 50.8 (31-68)<br>C: 49.2 (31-68) | 40/16<br><br>I: 21/7<br>C: 19/9 | Neer<br>Hawkins– Kennedy<br>Jobe                                                 | VAS<br>AROM<br>Constant<br><br>T2    | „The use of sub-acromial injection for pain control in the subacromial space provided better result in exercise program and it was found successful results in functional score and in range of motion when compared to the control group.“ |                        |
| 48 | Celik<br>2009<br><br>[48]<br><br>Turkey        | I: Intermittent US + Exercise + TENS + Ice<br><br>C: Placebo US + Exercise + TENS + Ice<br><br>F&D: 15 Sessions for 3 wks.                                                                                  | A: >40<br><br>D: >6                                                                                                     | 36<br><br>I: 20<br>C: 16                               | Ø 51 (40-69)                                           | 29/7                            | Hawkins– Kennedy<br>Jobe<br>Neer<br><br>MRI (stage II)                           | VAS<br>AROM<br>Constant<br><br>T1/T2 | “There is no need to add intermittent ultrasound to the standard treatment of patients with a diagnosis of SIS.”                                                                                                                            | <b>Female: +</b>       |
| 49 | Cha<br>2014<br><br>[49]<br><br>Korea           | I: Rehabilitation Exercise (Warm-up, Work-out, and Cool-down)<br><br>C: Controls without Rehabilitation Exercise<br><br>F&D: 3 times weekly for 12 wks.                                                     | Young baseball players<br><br>D:<br>I: 5.64 (1.22)<br>C: 6.06 (1.44)                                                    | 30 [30]<br><br>I: 16<br>C: 14                          | Ø<br><br>I: 22.57 (1.79)<br>C: 21.31 (1.74)            | Males only                      | Pain during Apprehension Relocation Test<br><br>Hawkins– Kennedy<br>Neer<br>Jobe | VAS<br><br>T1                        | „It was found that the Rehab program balanced between internal and external rotators and lowered the fatigue level.“                                                                                                                        | Athletes<br>Males only |
| 50 | Chard<br>1988<br><br>[50]<br><br>Great Britain | Portable Pulsed Electromagnetic Fields (PPEF)<br><br>I: Low dose (2 hrs.) (PPEF)<br><br>C: High dose (8 hrs.) (PPEF)<br><br>F&D: For 8 wks.                                                                 | A: >18<br><br>D: >3                                                                                                     | 49 [49]<br><br>I: 25/19<br>C: 24                       | Ø<br><br>I: 50.8<br>C: 52.8                            | 18/25<br><br>I: 10/9<br>C: 8/16 | Pain aggravated by movement and against resistance                               | VAS<br><br>T1                        | „Patient choice might lie between intensive treatment for a shorter time, or less consuming treatment over a longer period.“                                                                                                                |                        |

| ID | Authors<br>Year<br>Reference<br>Country        | INTERVENTION/CONTROLS:<br>I: INTERVENTIONS<br>C: CONTROLS<br>1: GROUP 1<br>2: GROUP 2<br>3: GROUP 3<br>4: GROUP 4<br>5: GROUP 5<br><br>F&D: Frequency of Treatment, Duration of Treatment Period      | Clinical Aspects:<br><br>A: Inclusion Age<br>D: Duration of Symptoms (months if not stated otherwise)<br>Co:<br>Comment           | N:<br>Included [Randomized]<br><br>Analysed :<br>I:<br>C: | Mean age (SD, Range)                                     | Female/<br>Male                         | Inclusion based on Test to confirm Diagnosis                                                       | Relevant Outcome/<br>Time of assessment | Conclusion of Study-<br>Authors                                                                                                                                                                                                                                    | Remarks                                     |
|----|------------------------------------------------|-------------------------------------------------------------------------------------------------------------------------------------------------------------------------------------------------------|-----------------------------------------------------------------------------------------------------------------------------------|-----------------------------------------------------------|----------------------------------------------------------|-----------------------------------------|----------------------------------------------------------------------------------------------------|-----------------------------------------|--------------------------------------------------------------------------------------------------------------------------------------------------------------------------------------------------------------------------------------------------------------------|---------------------------------------------|
| 51 | Chavez-Lopez<br>2009<br><br>[51]<br><br>Mexico | Blind or Ultrasound-guided Injection of<br><br>I: Methylprednisolone (MTP)<br><br>C: Triamcinolone (TMC)<br><br>F&D: One Single Injection                                                             | A: Not Specified<br><br>D: wks.<br>I: 26<br>C: 28<br><br>Co: 3 in each group with rheumatoid arthritis. (mentioned in discussion) | 24 [24]<br><br>I: 12<br>C: 12                             | ∅<br><br>I: 50.5 (38–68)<br>C: 52 (38–77)                | 21/3<br><br>I: 10/2<br>C: 11/1          | Neer<br>Yergason                                                                                   | AROM<br>VAS<br><br>T1                   | „In the 2 weeks post injection the results concerning pain and functional impairment in our study were the same between MTP and TMC. Treatment with MTP tend to have a more rapid effect in relief of pain than TMC in patients with painful shoulder.“            | <b>Female: +</b><br><br>No data Extractable |
| 52 | Chen<br>2006<br><br>[52]<br><br>Taiwan         | I: Ultrasound guided Injection<br><br>C: Blind Injections<br><br>F&D: Combination of 1 ml of Betamethasone + 1 ml of 1% Lidocaine. One Single Injection                                               | A: Not Specified<br><br>D: >1                                                                                                     | 40 [40]<br><br>I: 20<br>C: 20                             | ∅ 53 (30-66)                                             | Female<br>33%                           | Painful Arc<br>Reduced ROM                                                                         | AROM<br><br>T1                          | „Ultrasound guided injection can result in significant improvement in shoulder abduction.“                                                                                                                                                                         | Male: +                                     |
| 53 | Cheng<br>2007<br><br>[53]<br><br>Hong Kong     | I: Clinic based Work Hardening (CWH)<br><br>C: Work based Hardening<br><br>F&D: 4 wks.                                                                                                                | A: Not Specified<br><br>D: Not Specified                                                                                          | 103 [94]<br><br>I: 48<br>C: 46                            | ∅<br><br>I: 32.1 (10.33)<br>C: 32.6 (10.13)              | 22/72<br><br>I: 13/35<br>C: 9/37        | Work-related rotator cuff tendinitis: Confirm the sign and symptoms for the diagnosis of disorders | AROM<br>SPADI<br><br>T1                 | „Showed that workplace-based rehab intervention is more effective than conventional clinic-based rehabilitation programs in terms of decrease in perceived pain and disability, improvement in functional capabilities and prevention of further work disability.“ | Male: +<br><br>No data for VAS Extractable  |
| 54 | Choi<br>2013<br><br>[54]<br><br>South Korea    | 1: Triamcinolone 20 mg + Info + Exercise<br><br>2: Hyaluronidase 1,500 IU + Triamcinolone 20 mg + Info + Exercises<br><br>3: Triamcinolone 40 mg + Info + Exercise<br><br>F&D: Once a week for 2 wks. | A: Not Specified<br><br>D: Not Specified                                                                                          | 30 [30]<br><br>1: 10<br>2: 10<br>3: 10                    | ∅<br><br>1: 56.3 (6.8)<br>2: 55.7 (8.0)<br>3: 56.2 (7.9) | 15/15<br><br>1: 4/6<br>2: 6/4<br>3: 5/5 | Hawkins–Kennedy<br>Neer<br><br>Painful Arc<br><br>US                                               | AROM<br>SDQ<br>VAS<br><br>T1/T2         | „Hyaluronidase has little additive effect in subacromial bursa injection for reducing the dosage of steroid.“                                                                                                                                                      |                                             |

| ID | Authors<br>Year<br>Reference<br>Country        | INTERVENTION/CONTROLS:<br>I: INTERVENTIONS<br>C: CONTROLS<br>1: GROUP 1<br>2: GROUP 2<br>3: GROUP 3<br>4: GROUP 4<br>5: GROUP 5<br><br>F&D: Frequency of Treatment, Duration of Treatment Period | Clinical Aspects:<br><br>A: Inclusion Age<br>D: Duration of Symptoms (months if not stated otherwise)<br>Co:<br>Comment | N:<br>Included [Randomized]<br><br>Analysed :<br>I:<br>C: | Mean age (SD, Range)                        | Female/<br>Male                  | Inclusion based on Test to confirm Diagnosis                                   | Relevant Outcome/<br>Time of assessment | Conclusion of Study-<br>Authors                                                                                                                                                                                                                                                                                               | Remarks          |
|----|------------------------------------------------|--------------------------------------------------------------------------------------------------------------------------------------------------------------------------------------------------|-------------------------------------------------------------------------------------------------------------------------|-----------------------------------------------------------|---------------------------------------------|----------------------------------|--------------------------------------------------------------------------------|-----------------------------------------|-------------------------------------------------------------------------------------------------------------------------------------------------------------------------------------------------------------------------------------------------------------------------------------------------------------------------------|------------------|
| 55 | Chou<br>2010<br><br>[55]<br><br>Taiwan         | I: Sodium Hyaluronate<br><br>C: Placebo NACL<br><br>F&D: 5 Injections for 5 wks.                                                                                                                 | A: 35-80<br><br>D: >3<br>I: 12.5 (15.1)<br>C: 11.7 (17.86)                                                              | 65 [54]<br><br>I: 27/25<br>C: 27/26                       | ∅<br><br>I: 51.16 (7.84)<br>C: 52.38 (8.95) | 32/19<br><br>I: 16/9<br>C: 16/10 | Pain around the shoulder<br>Positive impingement sign<br><br>Imaging diagnosis | Constant VAS<br><br>T1/T2               | „The ARTZ @Dispo group had a better constant score and VAS score than those in the placebo group 6 weeks after.“                                                                                                                                                                                                              | <b>Female: +</b> |
| 56 | Cift<br>2015<br><br>[56]<br><br>Turkey         | I: Tenoxicam (NSAID)<br><br>C: Methylprednisolone acetate<br><br>F&D: Home based Exercise for all. 3 injection of Tenoxicam, a week apart                                                        | A: Not Specified<br><br>D: Not Specified                                                                                | 40 [40]<br><br>I: 20<br>C: 20                             | ∅<br><br>I: 45.3 (32-67)<br>C: 46.5 (29-73) | 22/18<br><br>I: 10/10<br>C: 12/8 | Hawkins–Kennedy<br>Neer<br>Painful Arc<br><br>MRI                              | AROM<br>DASH<br>VAS<br><br>T2/T5        | „Both subacromial tenoxicam and steroid injections may be successfully used in the treatment of patients with impingement syndrome.“                                                                                                                                                                                          |                  |
| 57 | Citaker<br>2005<br><br>[57]<br><br>Turkey      | I: Mobilizations + Hotpacks + Theraband + Exercise<br><br>C: PNF + Theraband + Exercise<br><br>F&D: 20 Sessions followed by 3 wks. of Theraband-Exercise in both groups.                         | A: Not Specified<br><br>D: Not Specified                                                                                | 40 [40]<br><br>I: 20<br>C: 20                             | ∅<br><br>I: 52.80 (9.86)<br>C: 55.5 (8.95)  | Not specified                    | Clinically and Radiological documented                                         | AROM<br>UCLA<br>VAS<br><br>T1           | „Mobilization and PNF methods are both effective, but mobilization is a painless technique and therefore was better tolerated than PNF.“                                                                                                                                                                                      |                  |
| 58 | Cloke<br>2008<br><br>[58]<br><br>Great Britain | 1: Exercise + Manual Therapy (EMTP)<br><br>2: Steroids<br><br>3: Exercise + Manual Therapy (EMTP) + Steroids<br><br>4: Control<br><br>F&D: 6 Sessions in 18 wks.                                 | A: >18<br><br>D: <6                                                                                                     | 186 [112]<br><br>1: 29<br>2: 28<br>3: 29<br>4: 27         | ∅: 54.8 (23-88)                             | 64/48                            | Painful Arc<br><br>Pain during active ABD without Resistance                   | OSS<br><br>T1                           | „No significant changes in the OSS in any of our groups at intervention end or trial end. There was a trend toward improved OSS in all groups at 1 year but an interesting decline in scores at trial end in those who had received injections as a sole treatment or along with Exercise and Manual Therapy Package (EMTP).“ |                  |

| ID | Authors<br>Year<br>Reference<br>Country           | INTERVENTION/CONTROLS:<br>I: INTERVENTIONS<br>C: CONTROLS<br>1: GROUP 1<br>2: GROUP 2<br>3: GROUP 3<br>4: GROUP 4<br>5: GROUP 5<br><br>F&D: Frequency of Treatment, Duration of Treatment Period | Clinical Aspects:<br><br>A: Inclusion Age<br>D: Duration of Symptoms (months if not stated otherwise)<br>Co:<br>Comment | N: Included [Randomized]<br><br>Analysed :<br>I:<br>C:                | Mean age (SD, Range)                                   | Female/Male                           | Inclusion based on Test to confirm Diagnosis                                         | Relevant Outcome/ Time of assessment   | Conclusion of Study- Authors                                                                                                                                                                                                                          | Remarks                         |
|----|---------------------------------------------------|--------------------------------------------------------------------------------------------------------------------------------------------------------------------------------------------------|-------------------------------------------------------------------------------------------------------------------------|-----------------------------------------------------------------------|--------------------------------------------------------|---------------------------------------|--------------------------------------------------------------------------------------|----------------------------------------|-------------------------------------------------------------------------------------------------------------------------------------------------------------------------------------------------------------------------------------------------------|---------------------------------|
| 59 | Cole<br>2015<br><br>[59]<br><br>Australia         | I: Ultrasound-guided steroid injection<br><br>C: Blind steroid injection<br><br>F&D: One single Injection of methylprednisolone and lidocaine.                                                   | A: >18<br><br>D: wks.<br>I: 16 (2-108)<br>C: 26 (1-108)                                                                 | 55 [51]<br><br>I: 25<br>C: 26                                         | ∅<br><br>I: 42 (23-62)<br>C: 46 (19-68)                | 28 / 23                               | Clinical signs of impingement<br><br>US                                              | VAS<br>ASES<br><br>T2                  | „No significant differences were found in the clinical outcome when comparing ultrasound-guided subacromial injections to blind subacromial injections for SIS.“                                                                                      | Bilateral included and treated. |
| 60 | Conroy<br>1998<br><br>[60]<br><br>USA             | I: Joint mobilization + Comprehensive Treatment<br><br>C: Comprehensive Treatment<br><br>F&D: 3 Times in 3 wks.                                                                                  | A: Not Specified<br><br>D: Not Specified                                                                                | 14 [14]<br><br>I: 7<br>C: 7                                           | ∅<br><br>I: 55.0 (10.2)<br>C: 50.7 (16.5)              | 6/8                                   | Hawkins–Kennedy Neer<br><br>Painful Arc<br><br>Subacromial compression test          | AROM<br>Pain<br><br>T1                 | „Preliminary evidence that the use of joint mobilization relieves pain over a 24 hour.“                                                                                                                                                               | Small Sample Study              |
| 61 | Cook<br>2014<br><br>[61]<br><br>USA               | I: Shoulder + Neck Treatment<br><br>C: Shoulder Treatment only<br><br>F&D: 3 Times in 3 wks.                                                                                                     | A: >18<br><br>D: wks.<br>I: 11.7 (4.6)<br><br>I: 12.9 (17.6)<br>C: 10.4 (10.6)                                          | 78 [74]<br><br>I: 36<br>C: 32                                         | ∅: 52.6 (14.1)<br><br>I: 54.1 (12.9)<br>C: 51.0 (15.5) | 31/37<br><br>I: 13/23<br>C: 18/14     | Hawkins–Kennedy Neer<br><br>Painful Arc<br><br>Pain during active shoulder movements | Quick<br>DASH<br>PASS<br>VAS<br><br>T1 | „Subjects did not experience additional benefit when a cervical mobilization on a tender cervical segmental level was added to a comprehensive shoulder treatment.“                                                                                   |                                 |
| 62 | Crawshaw<br>2010<br><br>[62]<br><br>Great Britain | I: Injection combined + Exercise + Manual Therapy<br><br>C: Exercise + Manual Therapy alone<br><br>F&D: One Single Shot and Comprehensive Therapy as many Sessions as deemed necessary           | A: >40<br><br>D: wks.<br>I: 14 (10–26)<br>C: 17 (12–28)                                                                 | 1132 [232]<br><br>I: 115<br>C: 117<br><br>Week 12:<br>I: 99<br>C: 106 | ∅<br><br>I: 57.2<br>C: 54.9                            | 127/302<br><br>I: 60/115<br>C: 67/117 | Hawkins–Kennedy Neer<br><br>A non-capsular pattern of restriction                    | SPADI (Pain and Disability)<br><br>T4  | „Steroid injection combined with exercise is of similar effectiveness to exercise only at 12 weeks. A third of patients treated with exercise and manual therapy alone do not improve sufficiently by 12 weeks and will opt for a steroid injection.“ | Male: +                         |

| ID | Authors<br>Year<br>Reference<br>Country      | INTERVENTION/CONTROLS:<br>I: INTERVENTIONS<br>C: CONTROLS<br>1: GROUP 1<br>2: GROUP 2<br>3: GROUP 3<br>4: GROUP 4<br>5: GROUP 5<br><br>F&D: Frequency of Treatment, Duration of Treatment Period | Clinical Aspects:<br><br>A: Inclusion Age<br>D: Duration of Symptoms (months if not stated otherwise)<br>Co:<br>Comment | N:<br>Included [Randomized]<br><br>Analysed :<br>I:<br>C: | Mean age (SD, Range)                                        | Female/<br>Male                            | Inclusion based on Test to confirm Diagnosis             | Relevant Outcome/<br>Time of assessment | Conclusion of Study-<br>Authors                                                                                                                                                                                                          | Remarks                                               |
|----|----------------------------------------------|--------------------------------------------------------------------------------------------------------------------------------------------------------------------------------------------------|-------------------------------------------------------------------------------------------------------------------------|-----------------------------------------------------------|-------------------------------------------------------------|--------------------------------------------|----------------------------------------------------------|-----------------------------------------|------------------------------------------------------------------------------------------------------------------------------------------------------------------------------------------------------------------------------------------|-------------------------------------------------------|
| 63 | De Freitas<br>2014<br><br>[63]<br><br>Brasil | I: Pulsed Electromagnetic Field (PEMF)<br><br>C: Placebo Group<br><br>F&D: 9 Sessions in 3 wks.                                                                                                  | A: 35-67<br><br>D:<br>I: 22.0 (17.7)<br>C: 21.2 (19)<br><br>CO:<br>Unilateral shoulder                                  | 61 [56]<br><br>I: 26<br>C: 30                             | Ø<br><br>I: 50.0 (8.2)<br>C: 50.8 (8.2)                     | 36/20<br><br>I: 16/10<br>C: 20/10          | Neer<br><br>US                                           | Constant<br>UCLA<br>VAS<br><br>T3       | „Pulsed electro-magnetic field (PEMF) proved to be effective in improving function and pain in individuals with SIS.“                                                                                                                    | <b>Unilateral</b>                                     |
| 64 | Dejaco<br>2016<br><br>[64]<br><br>Netherland | I: Eccentric exercise<br><br>C: Conventional exercise<br><br>F&D: physio session 9 in 12 wks., 12 weeks of daily exercise training                                                               | A: 18-65<br><br>D:<br>I: 16.9 (16.8)<br>C: 23.1 (23.8)<br><br>CO:<br>Unilateral shoulder                                | 41 [36]<br><br>I: 20<br>C: 16                             | Ø<br><br>I: 50.2 (10.8)<br>C: 48.6 (12.3)                   | 19/17<br><br>I: 10/10<br>C: 9/7            | Empty can test<br>Hawkins–<br>Kennedy<br>Neer            | AROM<br>Constant<br>VAS<br><br>T2/T3/T4 | „Based on the results, clinicians should take into account that performing two eccentric exercises twice a day is as effective as performing six concentric/ eccentric exercises once a day in patients with rotator cuff tendinopathy.“ | <b>Unilateral</b>                                     |
| 65 | Delgado-Gil<br>2015<br><br>[65]<br><br>Spain | I: Mobilization with Movement<br><br>C: Sham Manual Contact<br><br>F&D: 4 Sessions in 2 wks.                                                                                                     | A: Not Specified<br><br>D: >3<br>I: 9.2 (6.7)<br>C: 11.7 (7.9)                                                          | 87 [42]<br><br>I: 21<br>C: 21                             | Ø 45.65<br><br>I: 55.4 (7.8)<br>C: 54.3 (7.9)               | 34/8<br><br>I: 17/4<br>C: 17/4             | 2 positive Tests:<br>Hawkins-<br>Kennedy<br>Jobe<br>Neer | AROM<br>VAS<br><br>T1                   | „Who received 4 sessions of MWM exhibited significantly better outcomes for pain during shoulder flexion, pain-free range of shoulder flexion motion.“                                                                                   | <b>Female: +<br/>Unilateral<br/>Immediate effects</b> |
| 66 | Devereaux<br>2015<br><br>[66]<br><br>Canada  | I: Pre-cut kinesiology tape + Exercise<br><br>2: NSAID + Exercise<br><br>3: Exercise only<br><br>F&D: 4 Session in two wks.                                                                      | A: > 18<br><br>D: Not Specified                                                                                         | 106 [100]<br><br>1: 33<br>2: 29<br>3: 38                  | Ø<br><br>1: 50.0 (11.9)<br>2: 44.0 (10.5)<br>3: 50.0 (13.3) | 39/61<br><br>1:11/22<br>2: 8/21<br>3:20/18 | Hawkins-<br>Kennedy<br>Neer<br><br>Painful arc           | Constant<br>NPRS<br>SST<br><br>T1       | „The improvements in pain and function observed with an NSAID or Pre-cut Tape as adjuvant treatments were no greater than with rehab exercise alone.“                                                                                    |                                                       |



| ID | Authors<br>Year<br>Reference<br>Country          | INTERVENTION/CONTROLS:<br>I: INTERVENTIONS<br>C: CONTROLS<br>1: GROUP 1<br>2: GROUP 2<br>3: GROUP 3<br>4: GROUP 4<br>5: GROUP 5<br><br>F&D: Frequency of Treatment, Duration of Treatment Period                                      | Clinical Aspects:<br><br>A: Inclusion Age<br>D: Duration of Symptoms (months if not stated otherwise)<br>Co:<br>Comment | N: Included [Randomized]<br><br>Analysed :<br>I:<br>C: | Mean age (SD, Range)                                | Female/Male                       | Inclusion based on Test to confirm Diagnosis                                                  | Relevant Outcome/ Time of assessment | Conclusion of Study- Authors                                                                                                                                                                                    | Remarks          |
|----|--------------------------------------------------|---------------------------------------------------------------------------------------------------------------------------------------------------------------------------------------------------------------------------------------|-------------------------------------------------------------------------------------------------------------------------|--------------------------------------------------------|-----------------------------------------------------|-----------------------------------|-----------------------------------------------------------------------------------------------|--------------------------------------|-----------------------------------------------------------------------------------------------------------------------------------------------------------------------------------------------------------------|------------------|
| 67 | Di Lorenzo<br>2006<br><br>[67]<br><br>Italy      | I: Suprascapular Nerve Block and Rehabilitation (SSNB)<br><br>C: Rehabilitation<br><br>F&D: SSNB: 2 Shots in 2 wks.                                                                                                                   | A: Not Specified<br><br>D: <2 out of 4 weeks at the time of diagnosis<br><br>Co:<br>Crossover                           | 200 [40]<br><br>I: 20<br>C: 20                         | Ø 45.65<br><br>I: 46.02 (12.69)<br>C: 45.10 (12.01) | 22/18<br><br>I: 13/7<br>C: 9/11   | Painful Arc<br>Gerber<br>Jobe<br>Pate<br><br>Positive Impingement Test                        | VAS<br><br>T1                        | „During early rehabilitation phases nerve blocks allow a reduction painkiller assumption, a return to more normal sleep pattern, and an increase in the overall rehab process comfort, collaboration and mood.“ |                  |
| 68 | Dickens<br>2005<br><br>[68]<br><br>Great Britain | I: Physiotherapy prior to Surgery<br><br>C: Controls prior to Surgery<br><br>Patients who were placed on the Waiting List for Surgery were asked.<br><br>F&D: 1-2 Times per week until they felt, that they need no more supervision. | A: Not Specified<br><br>D: Not Specified                                                                                | 85 [85]<br><br>I: 45<br>C: 40                          | Ø<br><br>I: 55 (27-68)<br>C: 54 (26-73)             | 37/48<br><br>I: 19/26<br>C: 18/22 | Clinical findings<br><br>Injection Test:<br>3 blind steroids injections at 6 weekly intervals | Constant<br><br>T3                   | „It confirms that a physiotherapy program is of benefit.“                                                                                                                                                       |                  |
| 69 | Dilek<br>2015<br><br>[69]<br><br>Turkey          | I: Proprioceptive exercise + Conventional physiotherapy<br><br>C: Conventional physiotherapy<br><br>F&D: 2 Sessions per week for 6 wks.                                                                                               | A: 25-65<br><br>D:<br>I: 16.96 (22.18)<br>C: 17.10 (24.55)                                                              | 136 [63]<br><br>I: 31<br>C: 30                         | Ø<br><br>I: 50.06 (10.83)<br>C: 48.2 (9.74)         | 42/19<br><br>I: 23/8<br>C: 19/11  | Hawkins-Kennedy<br>Neer<br><br>MRI                                                            | VAS<br>WORC<br>ASES<br><br>T1        | „No additional positive effect on other clinical parameters was observed.“                                                                                                                                      | <b>Female: +</b> |
| 70 | Djordjevic<br>2012<br><br>[70]<br><br>Serbia     | I: Mobilization with Movement + Kinesiotaping<br><br>C: Supervised Exercise<br><br>F&D: 10 Sessions in 2 wks.                                                                                                                         | A: Not Specified<br><br>D:<br>I: 4.7 (0.6)<br>C: 4.8 (0.9)                                                              | 20 [20]<br><br>I: 10<br>C: 10                          | Ø<br><br>I: 51.80 (5.3)<br>C: 54.1 (6.8)            | 7/13<br><br>I: 4/6<br>C: 3/7      | Hawkins-Kennedy<br>Neer                                                                       | AROM<br><br>T1                       | „MWM and KT may be useful therapy modalities in improving active ROM in painful shoulder.“                                                                                                                      |                  |

| ID | Authors<br>Year<br>Reference<br>Country        | INTERVENTION/CONTROLS:<br>I: INTERVENTIONS<br>C: CONTROLS<br>1: GROUP 1<br>2: GROUP 2<br>3: GROUP 3<br>4: GROUP 4<br>5: GROUP 5<br><br>F&D: Frequency of Treatment, Duration of Treatment Period                                                                                                    | Clinical Aspects:<br><br>A: Inclusion Age<br>D: Duration of Symptoms (months if not stated otherwise)<br>Co:<br>Comment | N:<br>Included [Randomized]<br><br>Analysed<br>I:<br>C: | Mean age (SD, Range)                                      | Female/<br>Male                   | Inclusion based on Test to confirm Diagnosis                                              | Relevant Outcome/<br>Time of assessment | Conclusion of Study-<br>Authors                                                                                                                                                                                     | Remarks           |
|----|------------------------------------------------|-----------------------------------------------------------------------------------------------------------------------------------------------------------------------------------------------------------------------------------------------------------------------------------------------------|-------------------------------------------------------------------------------------------------------------------------|---------------------------------------------------------|-----------------------------------------------------------|-----------------------------------|-------------------------------------------------------------------------------------------|-----------------------------------------|---------------------------------------------------------------------------------------------------------------------------------------------------------------------------------------------------------------------|-------------------|
| 71 | Dogan<br>2010<br><br>[71]<br><br>Turkey        | I: Low Level Laser (LLL) Therapy + Exercise + Cold Pack<br><br>C: Placebo LLL Therapy + Exercise + Cold Pack<br><br>F&D: 14 Sessions, 5 Times a wk. for 3 wks.                                                                                                                                      | A: Not Specified<br><br>D:<br>I: 11.66 (18.04)<br>C: 15.27 (25.13)                                                      | 52 [52]<br><br>I: 30<br>C: 22                           | Ø: 53.59 (11.34)<br><br>I: 53.7 (12.6)<br>C: 53.45 (9.64) | 33/19<br><br>I: 20/10<br>C: 13/9  | Detailed physical and neurologic examination<br><br>MRI                                   | AROM<br>SPADI<br>VAS<br><br>T1          | „Results showed improvements on pain severity, ROM and functional status of the patients with SAIS. However no superiority over placebo laser therapy was observed.“                                                |                   |
| 72 | Dogu<br>2012<br><br>[72]<br><br>Turkey         | I: Ultrasound Guided Corticosteroid Injection<br><br>C: Blind Corticosteroid Injection<br><br>F&D: One Single Shot                                                                                                                                                                                  | A: Not Specified<br><br>D: >3<br>I: 7.43 (5.37)<br>C: 9.74 (7.67)                                                       | 50 [46]<br><br>I: 23<br>C: 23                           | Ø<br><br>I: 55.17 (9.24)<br>C: 56.74 (8.02)               | 31/15<br><br>I: 15/8<br>C: 16/7   | Hawkins–Kennedy<br>Jobe<br>Neer<br><br>MRI                                                | Constant<br>VAS<br><br>T2               | „Blind injections given in the subacromial region were as reliable as US-guided injection accuracy and could therefore be used in daily routines.“                                                                  |                   |
| 73 | Ekeberg<br>2009<br><br>[73]<br><br>Norway      | I: Local group: Ultrasound Guided Corticosteroid + Lidocaine Injection in the subacromial Bursa + Lidocaine Injection in the Gluteal Region<br><br>C: Systemic group: Corticosteroid + Lidocaine Injection in the Gluteal Region and Ultrasound Guided Lidocaine Injection in the subacromial Bursa | A: >18<br><br>D: >3<br>50% >1 yr.<br><br><1 yr.:<br>I: 32 of 53<br>C: 30 of 52                                          | 312 [106]<br><br>I: 53<br>C: 52                         | Ø<br><br>I: 51 (11)<br>C: 50                              | 65/41<br><br>I: 32/21<br>C: 33/20 | Pain on two of 3 isometric tests<br>Hawkins–Kennedy                                       | SPADI<br>WORC<br><br>T1/T2              | „Local ultrasound guided corticosteroid injection is unlikely to be substantially more effective than systemic corticosteroid injection for short term improvement of pain and disability in rotator cuff disease.“ |                   |
| 74 | Engebreetsen<br>2009<br><br>[74]<br><br>Norway | I: Supervised Exercise<br><br>C: Radio Corporeal Shock Wave Therapy (ESWT)<br><br>F&D: Two 45-min. Sessions weekly for 12 wks.                                                                                                                                                                      | A: 18-70<br><br>D: >3<br><br>50% >1yr<br>I: 34 von 52<br>C: 30 von 52<br><br>CO:<br>Unilateral pain                     | 141 [104]<br><br>I: 52<br>C: 52                         | Ø<br><br>I: 48.8 (20.6)<br>C: 45.1 (22.1)                 | 52/52<br><br>I: 26/26<br>C: 26/26 | Hawkins – Kennedy<br><br>Dysfunction or pain on ABD<br><br>Pain on 2 of 3 isometric tests | SPADI<br>VAS<br><br>T1/T2               | „After 18 weeks, supervised exercises were better than radial extracorporeal shock-wave treatment (ESWT) in terms of the primary outcome variable SPADI.“                                                           | <b>Unilateral</b> |

| ID | Authors<br>Year<br>Reference<br>Country          | INTERVENTION/CONTROLS:<br>I: INTERVENTIONS<br>C: CONTROLS<br>1: GROUP 1<br>2: GROUP 2<br>3: GROUP 3<br>4: GROUP 4<br>5: GROUP 5<br><br>F&D: Frequency of Treatment, Duration of Treatment Period        | Clinical Aspects:<br><br>A: Inclusion Age<br>D: Duration of Symptoms (months if not stated otherwise)<br>Co:<br>Comment | N:<br>Included [Randomized]<br><br>Analysed :<br>I:<br>C:          | Mean age (SD, Range)                                     | Female/<br>Male                           | Inclusion based on Test to confirm Diagnosis                                              | Relevant Outcome/<br>Time of assessment      | Conclusion of Study-<br>Authors                                                                                                                                                                          | Remarks                                                   |
|----|--------------------------------------------------|---------------------------------------------------------------------------------------------------------------------------------------------------------------------------------------------------------|-------------------------------------------------------------------------------------------------------------------------|--------------------------------------------------------------------|----------------------------------------------------------|-------------------------------------------|-------------------------------------------------------------------------------------------|----------------------------------------------|----------------------------------------------------------------------------------------------------------------------------------------------------------------------------------------------------------|-----------------------------------------------------------|
| 75 | Engebretsen<br>2011<br><br>[75]<br><br>Norway    | I: Supervised Exercise<br><br>C: Radio corporeal Shock Wave Therapy (ESWT)<br><br>F&D: Two 45-minute Sessions weekly for 12 wks. Once a week for 4 to 6 weeks, treating 3 to 5 tender points each time. | A: 18-70<br><br>D: >3<br>50% >1yr<br>I: 34 of 52<br>C: 30 of 52<br><br>Co: Unilateral pain                              | 141 [104]<br><br>I: 52<br>C: 52<br><br>At 1 yr.:<br>I: 49<br>C: 48 | Ø<br><br>I: 49 (9.3)<br>C: 47 (11.7)                     | 52/52<br><br>I: 26/26<br>C: 26/26         | Hawkins – Kennedy<br><br>Dysfunction or pain on ABD<br><br>Pain on 2 of 3 isometric tests | SPADI<br>VAS<br><br>T5                       | „ No significant difference between the supervised exercise (SE) and radial extra-corporeal shock-wave treatment (ESWT) groups at the 1-year follow-up.“                                                 | <b>Unilateral</b><br><br>Same study as Engebretsen (2009) |
| 76 | England<br>1989<br><br>[76]<br><br>Great Britain | 1: Active Laser Therapy<br><br>2: Dummy Laser Therapy<br><br>3: Drug Therapy (Naproxen)<br><br>F&D: 6 Sessions in 2 wks.                                                                                | A: >18<br><br>D: >4 wks.<br>12.5 wks.<br>(5-56)                                                                         | 30 [30]<br><br>I: 10<br>C: 10                                      | Ø 48 (18-78)                                             | 15/15<br><br>Not specified                | Pain on resisted Abduction                                                                | AROM<br>VAS<br><br>Not specified             | „These results demonstrate the effectiveness of laser therapy in tendonitis of the shoulder.“                                                                                                            | Small Sample Study<br><br>No data Extractable             |
| 77 | Eslamian<br>2012<br><br>[77]<br><br>Iran         | I: Gallium-arsenide Low Power Laser + Physiotherapy<br><br>C: Physiotherapy only<br><br>F&D: 10 Sessions, 3 Times a wk.                                                                                 | A:<br>I: 25-68<br>C: 25-75<br><br>D: Not Specified                                                                      | 50 [50]<br><br>I: 25<br>C: 25                                      | Ø<br><br>I: 50.16 (12.10)<br>C: 50.28 (11.74)            | 26/24<br><br>I: 10/15<br>C: 16/9          | Impingement Test<br><br>Hawkins– Kennedy<br><br>Painful Arc                               | AROM<br>VAS<br><br>T3                        | „Gallium-arsenide low power laser combined with conventional physiotherapy is superior to routine physiotherapy from the view of decreasing pain and improving patient's function.“                      |                                                           |
| 78 | Eyigor<br>2010<br><br>[78]<br><br>Turkey         | I: Steroids + Exercise<br><br>C: TENS + Exercise<br><br>F&D: 15 Sessions, 5 Times per wk. for 3 wks.                                                                                                    | A: 18-80<br><br>D: >3<br>I: 8.9 (5.1)<br>C: 8.6 (4.5)                                                                   | 50 [40]<br><br>I: 20<br>C: 20                                      | Ø<br><br>I: 60.8 (12.5)<br>C: 57.6 (9.92)                | 29/11<br><br>I: 15/5<br>C: 14/6           | US                                                                                        | AROM<br>SDQ<br>SF36<br>VAS<br><br>T1/T3      | „Conventional TENS and intra-articular injection of corticosteroid are efficient application in terms of pain, ROM, disability and quality of life in the treatment of rotator cuff tendinitis.“         | <b>Female: +</b>                                          |
| 79 | Farfaras<br>2014<br><br>[79]<br><br>Sweden       | 1: Physiotherapy according to Böhmer<br>2: Open acromioplasty<br>3: Arthroscopic acromioplasty<br><br>F&D: 5 local physiotherapy centres                                                                | A: 18-80<br><br>D: > 6<br>Most more than 13 mos.                                                                        | 95 [87]<br><br>1: 34<br>2: 24<br>3: 29                             | Ø<br><br>1: 49.9 (9.3)<br>2: 52.4 (9.5)<br>3: 48.9 (8.9) | 28/27<br><br>1: 8/13<br>2: 8/7<br>3: 12/7 | Subacromial Pain longer than 6mths.<br><br>US                                             | AROM<br>Constant<br>SF36<br>Watson<br><br>T6 | „The Constant score, other clinical assessments and subjective health-related QoL revealed no significant differences between the 3 groups two to three years after intervention in patients with SAIS.“ |                                                           |

| ID | Authors<br>Year<br>Reference<br>Country     | INTERVENTION/CONTROLS:<br>I: INTERVENTIONS<br>C: CONTROLS<br>1: GROUP 1<br>2: GROUP 2<br>3: GROUP 3<br>4: GROUP 4<br>5: GROUP 5<br><br>F&D: Frequency of Treatment, Duration<br>of Treatment Period          | Clinical<br>Aspects:<br><br>A: Inclusion<br>Age<br>D: Duration<br>of<br>Symptoms<br>(months if<br>not stated<br>otherwise)<br>Co:<br>Comment | N:<br>Included<br>[Random<br>ized]<br><br>Analysed<br>:<br>I:<br>C: | Mean<br>age (SD,<br>Range)                                           | Female/<br>Male                            | Inclusion<br>based on Test<br>to confirm<br>Diagnosis                          | Relevant<br>Outcome/<br>Time of<br>assessment | Conclusion of Study-<br>Authors                                                                                                                                                                                        | Remarks                                                                     |
|----|---------------------------------------------|--------------------------------------------------------------------------------------------------------------------------------------------------------------------------------------------------------------|----------------------------------------------------------------------------------------------------------------------------------------------|---------------------------------------------------------------------|----------------------------------------------------------------------|--------------------------------------------|--------------------------------------------------------------------------------|-----------------------------------------------|------------------------------------------------------------------------------------------------------------------------------------------------------------------------------------------------------------------------|-----------------------------------------------------------------------------|
| 80 | Galasso<br>2012<br><br>[80]<br><br>Italy    | I: Extracorporeal Shock Wave Therapy<br>(ESWT)<br><br>C: Sham Extracorporeal Shock Wave<br>Therapy<br><br>F&D: 2 Sessions 7 days apart                                                                       | A: >18<br><br>D:<br>I: 45.36<br>(34.33)<br>C: 61.22<br>(24.04)                                                                               | 20 [20]<br><br>I: 11<br>C: 9                                        | Ø<br><br>I: 50.7<br>(8.44)<br>C: 51.11<br>(13.26)                    | 9/11<br><br>I: 4/7<br>C: 5/4               | MRI                                                                            | Constant<br><br>T2/T3                         | „Demonstrated that<br>patients suffering from<br>NCST (non calcific<br>tendinopathy of the<br>supraspinatus) may<br>benefit from low energy<br>shock waves, at least in<br>the short-term.”                            | Small<br>Sample<br>Study<br><br><b>Unilateral</b>                           |
| 81 | Garcia<br>2015<br><br>[81]<br><br>Spain     | I: Ultrasound + Exercise<br><br>2: Iontophoresis + Exercise<br><br>3: Exercise<br><br>F&D: 15 Sessions in 3 wks.                                                                                             | A: >18<br><br>D:<br><br>For all:<br>60% >6 mos.                                                                                              | 175 [88]<br><br>I: 30<br>2: 26<br>3: 32                             | Ø<br><br>1: 61.9<br>(13.0)<br>2: 57.7<br>(17.3)<br>3: 56.9<br>(12.3) | 47/31<br><br>1:15/12<br>2: 13/9<br>3:19/10 | Hawkins–<br>Kennedy<br><br>Painful Arc<br>Isometric tests<br>Palpation         | Constant<br>DASH<br><br>T2/T3                 | „In patients with SIS<br>improvements in pain,<br>strength, range of<br>motion, and vitality<br>showed that a<br>combination of<br>ultrasonophoresis and an<br>exercise program are<br>better than exercise<br>alone.” | <b>Female: +</b><br><br>Not possible<br>to extract<br>standardize<br>d data |
| 82 | Gialanella<br>2011<br><br>[82]<br><br>Italy | 1: Steroid Injection of 40 mg Triamcinolone<br>acetate (TA)<br><br>2: 2 Steroid Injection of 40 mg<br>Triamcinolone 21 days apart<br><br>3: No Treatment                                                     | A: >75<br><br>D:<br>1: 6.6 (5.2)<br>2: 4.4 (2.7)<br>3: 5.2 (2.6)<br><br>Co: Full<br>thickness<br>RCT                                         | 60 [60]<br><br>1: 20<br>2: 20<br>3: 20                              | Ø<br><br>1: 78.7<br>(6.6)<br>2: 77.3<br>(4.9)<br>3: 79.4<br>(4.5)    | 55/5<br><br>1: 18/2<br>2: 19/1<br>3: 18/2  | MRI<br>US                                                                      | Constant<br>VAS<br><br>T3/T4                  | „We found that<br>intraarticular injection of<br>TA improves pain relief<br>in RCT for up to 3<br>months and additional<br>injections after 21 days<br>do not increase TA<br>therapeutic effect.”                      | <b>Female: +</b><br><br>Full<br>thickness<br>RCT                            |
| 83 | Giombini<br>2006<br><br>[83]<br><br>England | 1: Hyperthermia<br><br>2: Ultrasound<br><br>C: Passive Exercise<br><br>F&D:<br>1: 12 Sessions, 3/a week for 4 wks.<br>2: 3/a week Ultrasound<br>3: Passive Exercises 5 min. a day, twice a<br>day for 4 wks. | A: >18<br><br>D:<br>4 8 (2.3)                                                                                                                | 159 [37]<br><br>1: 14<br>2: 12<br>3: 11                             | Ø<br><br>1: 25.3<br>(4.8)<br>2: 28.6<br>(6.6)<br>3: 26.3<br>(6.2)    | 8/29<br><br>1: 2/12<br>2: 4/8<br>3: 2/9    | Hawkins–<br>Kennedy<br>Neer<br><br>Empty can<br><br>Resisted testing<br><br>US | Constant<br>VAS<br><br>T1/T2                  | „Hyperthermia is<br>effective in the<br>management of<br>established<br>supraspinatus<br>tendinopathy.”                                                                                                                | Male: +                                                                     |

| ID | Authors<br>Year<br>Reference<br>Country     | INTERVENTION/CONTROLS:<br>I: INTERVENTIONS<br>C: CONTROLS<br>1: GROUP 1<br>2: GROUP 2<br>3: GROUP 3<br>4: GROUP 4<br>5: GROUP 5<br><br>F&D: Frequency of Treatment, Duration of Treatment Period | Clinical Aspects:<br><br>A: Inclusion Age<br>D: Duration of Symptoms (months if not stated otherwise)<br>Co:<br>Comment | N:<br>Included [Randomized]<br><br>Analysed :<br>I:<br>C: | Mean age (SD, Range)                                      | Female/<br>Male                   | Inclusion based on Test to confirm Diagnosis           | Relevant Outcome/<br>Time of assessment | Conclusion of Study-<br>Authors                                                                                                                                                                                                  | Remarks           |
|----|---------------------------------------------|--------------------------------------------------------------------------------------------------------------------------------------------------------------------------------------------------|-------------------------------------------------------------------------------------------------------------------------|-----------------------------------------------------------|-----------------------------------------------------------|-----------------------------------|--------------------------------------------------------|-----------------------------------------|----------------------------------------------------------------------------------------------------------------------------------------------------------------------------------------------------------------------------------|-------------------|
| 84 | Goeksu<br>2015<br><br>[84]<br><br>Turkey    | I: Subacromial Injection/local anaesthetic + home exercise<br><br>C: Kinesio Taping + home exercise<br><br>F&D:<br>I: One single shot<br>C: Taping three times with 3 days interval              | A: 20-50<br><br>D: >12 wks.<br>I: 2.33 (0.78)<br>C: 2.37 (0.81)                                                         | 81 [67]<br><br>I: 34<br>C: 33                             | Ø<br><br>I: 42.63 (6.88)<br>C: 43.45 (6.39)               | 48/13<br><br>I: 25/5<br>C: 23/8   | Hawkins – Kennedy<br>Jobe<br>Painful arc<br><br>MRI    | AROM<br>VAS<br>SPADI<br><br>T1/T2       | „Although the improvement in pain at rest, abduction ROM measures and disability were better with local injection, KT may be an alternative non invasive method to local subacromial injection for patients suffering from SIS.“ | <b>Female: +</b>  |
| 85 | Granviken<br>2015<br><br>[85]<br><br>Norway | I: Home exercises<br><br>C: Supervised exercises + home exercises<br><br>F&D: C: 10 supervised treatments for 6 wks.                                                                             | A: 18-65<br><br>D: >12 wks.<br>I: 12 (6-36)<br>C: 17 (10-48)                                                            | 509 [46]<br><br>I: 23<br>C: 23                            | Ø<br><br>I: 48.2 (9.8)<br>C: 47.6 (10.0)                  | 10/12<br><br>I: 5/6<br>C: 5/6     | Hawkins – Kennedy<br>Infraspinatus test<br>Painful arc | AROM<br>NPRS<br>SPADI<br><br>T1         | „Home exercises and supervised exercises are similarly effective for people with SAIS.“                                                                                                                                          | <b>Unilateral</b> |
| 86 | Guimaraes<br>2015<br><br>[86]<br><br>Brasil | I: Mobilisation with Movements<br><br>C: Sham Technique<br><br>F&D: 4 session of treatment<br>Crossover                                                                                          | A: 18-65<br><br>D: >1 week<br>I: 31.9 (21.6)<br>C: 31.0 (37.9)                                                          | 92 [27]<br><br>I: 14<br>C: 13                             | Ø<br><br>I: 30.3 (6.9)<br>C: 31.9 (9.2)                   | 15/12<br><br>I: 8/6<br>C: 7/6     | Hawkins – Kennedy<br>Neer<br>Jobe<br>Painful arc       | AROM<br>SPADI<br><br>T1                 | „The MWM technique was no more effective than a sham intervention in improving shoulder ROM during external rotation and abduction, pain, and function in patients with shoulder impingement syndrome.“                          |                   |
| 87 | Guler<br>2009<br><br>[87]<br><br>Turkey     | I: Ketoprofen + Lidocaine Phonophoresis + Rehab Program (TENS + Hot Pack + Exercise)<br><br>C: Ketoprofen Phonophoresis + Rehab Program (TENS + Hot Pack + Exercises)<br><br>F&D: 15 Sessions    | A: Not Specified<br><br>D:<br>I: 12 (2-24)<br>C: 8 (1-24)                                                               | 70 [70]<br><br>I: 37<br>C: 33                             | Ø 55.54 (9.97)<br><br>I: 54.29 (8.06)<br>C: 56.93 (11.72) | 39/31<br><br>I: 24/13<br>C: 15/18 | Hawkins – Kennedy<br>Neer<br><br>MRI                   | AROM<br>UCLA<br>VAS<br><br>T1/T3        | „Ketoprofen and lidocaine prilocaine phonophoresis were more effective on pain and ROM than ketoprofen phonophoresis alone in the 3rd month after treatment in patients with SIS.“                                               |                   |

| ID | Authors<br>Year<br>Reference<br>Country   | INTERVENTION/CONTROLS:<br>I: INTERVENTIONS<br>C: CONTROLS<br>1: GROUP 1<br>2: GROUP 2<br>3: GROUP 3<br>4: GROUP 4<br>5: GROUP 5<br><br>F&D: Frequency of Treatment, Duration<br>of Treatment Period | Clinical<br>Aspects:<br><br>A: Inclusion<br>Age<br>D: Duration<br>of<br>Symptoms<br>(months if<br>not stated<br>otherwise)<br>Co:<br>Comment | N:<br>Included<br>[Random<br>ized]<br><br>Analysed<br>:<br>I:<br>C: | Mean<br>age (SD,<br>Range)                        | Female/<br>Male                   | Inclusion<br>based on Test<br>to confirm<br>Diagnosis        | Relevant<br>Outcome/<br>Time of<br>assessment | Conclusion of Study-<br>Authors                                                                                                                                                                                                                          | Remarks                          |
|----|-------------------------------------------|-----------------------------------------------------------------------------------------------------------------------------------------------------------------------------------------------------|----------------------------------------------------------------------------------------------------------------------------------------------|---------------------------------------------------------------------|---------------------------------------------------|-----------------------------------|--------------------------------------------------------------|-----------------------------------------------|----------------------------------------------------------------------------------------------------------------------------------------------------------------------------------------------------------------------------------------------------------|----------------------------------|
| 88 | Haahr<br>2005<br><br>[88]<br><br>Denmark  | I: Physiotherapy<br><br>C: Surgery Arthroscopy<br><br>F&D: 19 Sessions in 12 wks.                                                                                                                   | A: 18-55<br><br>D:<br><1 yr.<br>I: 13/43<br>C: 7/41<br><br>>1 yr.<br>I: 29/43<br>C: 34/41                                                    | 90 [90]<br><br>I: 43<br>C: 41                                       | Ø<br><br>I: 44.5<br>(1.2)<br>C: 44.3<br>(1.3)     | 58/26<br><br>1: 29/14<br>C: 29/12 | Painful Arc<br><br>Hawkins–<br>Kennedy<br><br>Injection Test | VAS<br>Constant<br><br>T1/T3/T5               | „Found similar<br>improvements in the two<br>treatment groups, as<br>measured by the<br>Constant score and the<br>pain and dysfunction<br>score.”                                                                                                        |                                  |
| 89 | Haahr<br>2006<br><br>[89]<br><br>Denmark  | I: Physiotherapy<br><br>C: Surgery arthroscopy<br><br>F&D: 19 Sessions in 12 wks.                                                                                                                   | A: 18-55<br><br>D:<br><1 yr.<br>I: 13/43<br>C: 7/41<br><br>>1 yr.<br>I: 29/43<br>C: 34/41                                                    | 90 [90]<br><br>I: 43<br>C: 41                                       | Ø<br><br>I: 44.5<br>(1.2)<br>C: 44.3<br>(1.3)     | 58/26<br><br>1: 29/14<br>C: 29/12 | Hawkins–<br>Kennedy<br><br>Painful Arc<br><br>Injection Test | Constant<br><br>T6                            | „Found similar<br>improvements in the two<br>treatment groups, as<br>measured by the<br>Constant score and the<br>pain and dysfunction<br>score. Greatest gain<br>occurred within the first 3<br>months.”                                                | Same study<br>as Haahr<br>(2005) |
| 90 | Haake<br>2001<br><br>[90]<br><br>Germany  | I: Extracorporeal Shock Wave Therapy<br>(ESWT)<br><br>C: Radiotherapy<br><br>F&D: I: ESWT 3 Sessions in 3 wks.                                                                                      | A: Not<br>Specified<br><br>D: >6<br>I: 29 (9-120)<br>C: 24 (6-72)                                                                            | 50 [50]<br><br>I: 16<br>C: 14                                       | Ø<br><br>I: 52.1<br>(32-64)<br>C: 53.6<br>(39-66) | 15/15<br><br>I: 8/8<br>C: 7/7     | Supraspinatus<br>tendinitis                                  | Constant<br><br>T2/T3/T5                      | „No statistically<br>significant differences<br>were proven between<br>ESWT and<br>radiotherapy.”                                                                                                                                                        |                                  |
| 91 | Haghighat<br>2015<br><br>[91]<br><br>Iran | I: Ultrasound-guided steroid injection<br><br>C: Blind injection<br><br>F&D: 40mg methylprednisolone with 1cc<br>lidocaine 2%                                                                       | A: Not<br>Specified<br><br>D:<br>I: 1.8 (0.54)<br>C: 1.87 (0.48)                                                                             | 48 [40]<br><br>I: 20<br>C: 20                                       | Ø<br><br>I: 50.45<br>(6.78)<br>C: 52.3<br>(7.48)  | 25/15<br><br>I: 12/8<br>C: 13/7   | Hawkins-<br>Kennedy<br>Neer<br><br>Painful Arc<br><br>US     | AROM<br>SPADI<br>VAS<br><br>T2                | “Our findings suggest that<br>US image guided can<br>improve the shoulder<br>function of patients with<br>impingement syndrome,<br>and can be considered in<br>comprehensive care<br>programs of these<br>patients for fast speed of<br>rehabilitation.” |                                  |

| ID | Authors<br>Year<br>Reference<br>Country        | INTERVENTION/CONTROLS:<br>I: INTERVENTIONS<br>C: CONTROLS<br>1: GROUP 1<br>2: GROUP 2<br>3: GROUP 3<br>4: GROUP 4<br>5: GROUP 5<br><br>F&D: Frequency of Treatment, Duration<br>of Treatment Period | Clinical<br>Aspects:<br><br>A: Inclusion<br>Age<br>D: Duration<br>of<br>Symptoms<br>(months if<br>not stated<br>otherwise)<br>Co:<br>Comment | N:<br>Included<br>[Random<br>ized]<br><br>Analysed<br>:<br>I:<br>C:    | Mean<br>age (SD,<br>Range)                                          | Female/<br>Male                               | Inclusion<br>based on Test<br>to confirm<br>Diagnosis                                                                     | Relevant<br>Outcome/<br>Time of<br>assessment | Conclusion of Study-<br>Authors                                                                                                                                                                                                                                                 | Remarks                                                            |
|----|------------------------------------------------|-----------------------------------------------------------------------------------------------------------------------------------------------------------------------------------------------------|----------------------------------------------------------------------------------------------------------------------------------------------|------------------------------------------------------------------------|---------------------------------------------------------------------|-----------------------------------------------|---------------------------------------------------------------------------------------------------------------------------|-----------------------------------------------|---------------------------------------------------------------------------------------------------------------------------------------------------------------------------------------------------------------------------------------------------------------------------------|--------------------------------------------------------------------|
| 92 | Haik<br>2014<br><br>[92]<br><br>Brasil         | I: Mid Thoracic Spine Manipulation<br><br>C: Sham Thoracic Manipulation<br><br>F&D: One Sessions with up to 3<br>Manipulations                                                                      | A: Not<br>Specified<br><br>D:<br>I: 49 (96)<br>C: 42.6 (66)<br><br>Co:<br>Asymptomatic<br>also<br>controlled                                 | 50 [50]<br><br>I: 25<br>C: 25                                          | ∅<br><br>I: 33.8<br>(12.2)<br>C:29.7<br>(9.3)                       | 18/32<br><br>I: 11/14<br>C: 7/18              | Hawkins-<br>Kennedy<br>Jobe<br>Neer<br><br>Painful Arc<br><br>Resisted testing                                            | NPRS<br><br>T1                                | „Results suggest that<br>shoulder pain<br>immediately decreases<br>in subjects with SIS after<br>thoracic spine<br>manipulation.“                                                                                                                                               | Male: +                                                            |
| 93 | Heron<br>2016<br><br>[93]<br><br>Great Britain | 1: Open chain resisted band exercise<br><br>2: Closed chain exercises<br><br>3: Minimally loaded range of movement<br>exercise<br><br>F&D: 3 sessions in 6 wks., home exercises<br>twice daily      | A: Not<br>Specified<br><br>D: > 3mths.<br>1: 49 (96)<br>2: 42.6 (66)<br>3:                                                                   | 120 [120]<br><br>1: 40<br>2: 40<br>3: 40                               | ∅<br><br>1: 50.4<br>2: 49.8<br>3: 49.5                              | 18/32<br><br>1: 16/24<br>2: 18/22<br>3: 15/25 | Empty can test<br>Hawkins-<br>Kennedy<br><br>Resisted testing                                                             | SPADI<br><br>T1                               | „Open chain, closed<br>chain and range of<br>movement exercises all<br>seem to be effective in<br>bringing about short term<br>changes in pain and<br>disability in patients with<br>rotator cuff<br>tendinopathy.“                                                             |                                                                    |
| 94 | Holmgren<br>2012<br><br>[94]<br><br>Sweden     | I: Specific Exercise<br><br>C: Control Exercise<br><br>F&D: 6-7 Sessions in 10 wks.                                                                                                                 | A: 30-65<br><br>D:<br>I: 24 (6-120)<br>C: 12 (6-156)                                                                                         | 152 [102]<br><br>I: 51<br>C: 46                                        | ∅<br><br>I: 52 (9)<br>C: 52 (8)                                     | 36/61<br><br>I: 14/37<br>C: 22/24             | 3 positive Tests<br>of:<br>Hawkins-<br>Kennedy<br>Jobe<br>Neer<br>Patte<br><br>Injection Test                             | Constant<br>DASH<br>EQ-5d<br>VAS<br><br>T1    | „This specific exercise<br>strategy is effective in<br>improving shoulder<br>function and pain in<br>patients with persistent<br>SAIS, in whom earlier<br>conservative treatment<br>has failed. By extension,<br>this could reduce the<br>need for surgery within 3<br>months.“ | Same study<br>as<br>Björnsson<br>Hallgren<br>(2014)<br><br>Male: + |
| 95 | Hong<br>2011<br><br>[95]<br><br>South Korea    | 1: 40 mg Triamcinolone<br><br>2: 20 mg Triamcinolone<br><br>3: Placebo                                                                                                                              | A: 20-70<br><br>D: >1<br>1: 8.9 (10.6)<br>2:13 (12.1)<br>3:8.6 (9.2)                                                                         | 271 [90]<br><br>1: 30<br>2: 30<br>3: 30<br><br>1: 27<br>2: 25<br>3: 27 | ∅<br><br>1: 50.8<br>(9.9)<br>2: 48.6<br>(13.0)<br>3: 51.0<br>(10.0) | 47/32<br><br>1: 17/10<br>2: 15/10<br>3: 15/12 | Hawkins-<br>Kennedy<br>Jobe<br>Neer<br>Yocum<br>Clinically<br>diagnosed peri-<br>articular<br>disorder of the<br>shoulder | AROM<br>SDQ<br>VAS<br><br>T1/T2/T3            | „Initial use of a low dose<br>is encouraged because<br>there was no difference<br>in efficacy according to<br>dose, and the effect of<br>corticosteroid lasted up<br>to 8 wks.“                                                                                                 |                                                                    |

| ID | Authors<br>Year<br>Reference<br>Country     | INTERVENTION/CONTROLS:<br>I: INTERVENTIONS<br>C: CONTROLS<br>1: GROUP 1<br>2: GROUP 2<br>3: GROUP 3<br>4: GROUP 4<br>5: GROUP 5<br><br>F&D: Frequency of Treatment, Duration<br>of Treatment Period | Clinical<br>Aspects:<br><br>A: Inclusion<br>Age<br>D: Duration<br>of<br>Symptoms<br>(months if<br>not stated<br>otherwise)<br>Co:<br>Comment | N:<br>Included<br>[Random<br>ized]<br><br>Analysed<br>:<br>I:<br>C:                     | Mean<br>age (SD,<br>Range)                                                | Female/<br>Male                   | Inclusion<br>based on Test<br>to confirm<br>Diagnosis                        | Relevant<br>Outcome/<br>Time of<br>assessment                              | Conclusion of Study-<br>Authors                                                                                                                                    | Remarks                  |
|----|---------------------------------------------|-----------------------------------------------------------------------------------------------------------------------------------------------------------------------------------------------------|----------------------------------------------------------------------------------------------------------------------------------------------|-----------------------------------------------------------------------------------------|---------------------------------------------------------------------------|-----------------------------------|------------------------------------------------------------------------------|----------------------------------------------------------------------------|--------------------------------------------------------------------------------------------------------------------------------------------------------------------|--------------------------|
| 96 | Hoyek<br>2004<br><br>[96]<br><br>France     | I: Motor imagery (MI) and Comprehensive<br>Physiotherapy<br><br>C: Comprehensive Physiotherapy<br><br>F&D: 10 Sessions of 1 hr.; 3 Times a wk.                                                      | A: 35-65<br><br>D: Not<br>Specified                                                                                                          | 16 [16]<br><br>I: 8<br>C: 8                                                             | Ø 46.31<br>(9.02)                                                         | 8/8<br><br>I: 4 /4<br>C: 4/4      | MRI<br>(Stage II)                                                            | AROM<br>Constant<br>VAS<br><br>T1                                          | „MI may help in relieving<br>pain and enhancing<br>shoulder mobility in a<br>stage II impingement<br>syndrome.“                                                    | Small<br>Sample<br>Study |
| 97 | Jensen<br>2014<br><br>[97]<br><br>USA       | I: Corticosteroid Injection<br><br>C: Heated Lidocaine + Tetracaine Patch<br><br>F&D:<br>I: One Single Shot<br>C: Twice daily for 4 hrs. for 2 wks., one for<br>the next 2 wks.                     | A: >18<br><br>D: >2 wks.<br><br>Co: Unilateral                                                                                               | 60 [46]<br><br>I: 23<br>C: 23                                                           | Ø<br><br>I: 51.5<br>(10.0)<br>(18-68)<br><br>C: 50.5<br>(12.4)<br>(28-72) | 15/31<br><br>I: 6/17<br>C: 9/14   | Hawkins–<br>Kennedy<br>Neer<br><br>Average pain:<br>>4 on NRS 10             | PQAS<br><br>T1                                                             | „The findings support the<br>importance of assessing<br>both pain qualities and<br>time course of treatment<br>as outcome domains.“                                | <b>Unilateral</b>        |
| 98 | Johansson<br>2005<br><br>[98]<br><br>Sweden | 1: Acupuncture + Home Exercise<br><br>C: Ultrasound + Home Exercise<br><br>F&D: Twice a week for 10 Sessions                                                                                        | A: 30-65<br><br>D: >2                                                                                                                        | 88 [85]<br><br>I: 44<br>C: 41<br><br>3 mo.<br>I: 42<br>C: 34<br>6 mo.<br>I: 37<br>C: 32 | Ø<br><br>I: 49<br>C: 49 (8)                                               | 59/26<br><br>I: 32/12<br>C: 27/14 | Painful Arc<br><br>Hawkins–<br>Kennedy<br>Jobe<br>Neer<br><br>Injection Test | Combined<br>score of<br>UCLA, AL<br>and<br>Constant<br><br>T1/T3/T4/<br>T5 | „Indicates that a physical<br>therapy strategy with a<br>combination of<br>acupuncture and home<br>exercises is more<br>beneficial for most<br>patients with SIS.“ | <b>Female: +</b>         |



| ID  | Authors<br>Year<br>Reference<br>Country     | INTERVENTION/CONTROLS:<br>I: INTERVENTIONS<br>C: CONTROLS<br>1: GROUP 1<br>2: GROUP 2<br>3: GROUP 3<br>4: GROUP 4<br>5: GROUP 5<br><br>F&D: Frequency of Treatment, Duration<br>of Treatment Period                                                             | Clinical<br>Aspects:<br><br>A: Inclusion<br>Age<br>D: Duration<br>of<br>Symptoms<br>(months if<br>not stated<br>otherwise)<br>Co:<br>Comment                                 | N:<br>Included<br>[Random<br>ized]<br><br>Analysed<br>:<br>I:<br>C: | Mean<br>age (SD,<br>Range)                        | Female/<br>Male                                   | Inclusion<br>based on Test<br>to confirm<br>Diagnosis                                 | Relevant<br>Outcome/<br>Time of<br>assessment                       | Conclusion of Study-<br>Authors                                                                                                                                                                                                                                                                                                                                                         | Remarks |
|-----|---------------------------------------------|-----------------------------------------------------------------------------------------------------------------------------------------------------------------------------------------------------------------------------------------------------------------|------------------------------------------------------------------------------------------------------------------------------------------------------------------------------|---------------------------------------------------------------------|---------------------------------------------------|---------------------------------------------------|---------------------------------------------------------------------------------------|---------------------------------------------------------------------|-----------------------------------------------------------------------------------------------------------------------------------------------------------------------------------------------------------------------------------------------------------------------------------------------------------------------------------------------------------------------------------------|---------|
| 99  | Johansson<br>2011<br><br>[99]<br><br>Sweden | I: Corticosteroid Injection (40 mg<br>Methylprednisolone) + 8–10 ml 1 %<br>Prilocaine.<br><br>C: Acupuncture + Home Exercise<br><br>F&D: Twice weekly (30 min) for 5 wks.                                                                                       | A: Not<br>Specified<br><br>D: >2<br><br><3 mos.<br>I: 12 /49<br>C: 20/42<br><br>4-6 mos.<br>I: 23/49<br>C: 13/42<br><br>7-12 mos.<br>I: 9 /49<br>C: 7/42<br>Rest >12<br>mos. | 233 [123]<br><br>I: 49<br>C: 42                                     | Ø<br><br>I: 50 (9)<br>C: 51 (9)                   | 53/38<br><br>I: 27/22<br>C: 26/16                 | Hawkins –<br>Kennedy<br>Neer<br><br>Injection Test<br>(1 and 2)                       | Adolfsson–<br>Lysholm<br>shoulder<br>scale<br><br>T2/ T3/ T4/<br>T5 | „Both treatments can be<br>recommended for<br>patients with SIS<br>attending primary care<br>facilities.“                                                                                                                                                                                                                                                                               |         |
| 100 | Just<br>2009<br><br>[100]<br><br>Germany    | I: Physiotherapy + Manual Therapy<br><br>C: Physiotherapy<br><br>F&D: 6 Sessions (30 min) in 4 wks.                                                                                                                                                             | A: >18–80<br><br>D: >6 wks.                                                                                                                                                  | 46 [42]<br><br>I: 20<br>C: 22                                       | Ø<br><br>I: 52.7<br>C: 57.1                       | 22/20<br><br>I: 9/11<br>C: 13/9                   | Clinical Tests<br>for Bursitis and<br>Impingement                                     | Constant<br>VAS<br><br>T1                                           | „The subjects with<br>manual therapy showed<br>a significant<br>improvement of shoulder<br>flexion arm mobility.“                                                                                                                                                                                                                                                                       |         |
| 101 | Kachingwe<br>2008<br><br>[101]<br><br>USA   | 1: Supervised Exercise only<br><br>2. Supervised Exercise with Glenohumeral<br>Mobilizations<br><br>3: Supervised Exercise with Movement<br>Technique (MWM Mulligan)<br><br>4: Control Group receiving only Advice<br><br>F&D: One Sessions per week for 6 wks. | A: 18-74<br><br>D:<br>1. 32.5 (60.2)<br>2. 19.2 (24.6)<br>3. 22.6 (17.4)<br>4. 70.0 (92.4)                                                                                   | 33 [33]<br><br>1: 8<br>2: 9<br>3: 9<br>4: 7                         | Ø<br><br>1: 47.3<br>2: 43.4<br>3: 48.9<br>4: 45.6 | 16/17<br><br>1: 4/4<br>2: 5/4<br>3: 4/5<br>4: 3/4 | Painful<br>movement<br>Hand behind<br>back or head<br><br>Hawkins–<br>Kennedy<br>Neer | AROM<br>SPADI<br>VAS<br><br>T1                                      | “Physical therapy inter-<br>ventions of glenohumeral<br>mobilizations and MWM<br>in combination with a<br>supervised exercise<br>program resulted in a<br>higher percentage of<br>change (but not<br>statistically significant)<br>from pre- to post-<br>treatment in decreasing<br>pain and improving<br>function com-pared to<br>the supervised exercise<br>only and control groups.” |         |

| ID  | Authors<br>Year<br>Reference<br>Country               | INTERVENTION/CONTROLS:<br>I: INTERVENTIONS<br>C: CONTROLS<br>1: GROUP 1<br>2: GROUP 2<br>3: GROUP 3<br>4: GROUP 4<br>5: GROUP 5<br><br>F&D: Frequency of Treatment, Duration<br>of Treatment Period             | Clinical<br>Aspects:<br><br>A: Inclusion<br>Age<br>D: Duration<br>of<br>Symptoms<br>(months if<br>not stated<br>otherwise)<br>Co:<br>Comment | N:<br>Included<br>[Random<br>ized]<br><br>Analysed<br>:<br>I:<br>C: | Mean<br>age (SD,<br>Range)                                              | Female/<br>Male                               | Inclusion<br>based on Test<br>to confirm<br>Diagnosis         | Relevant<br>Outcome/<br>Time of<br>assessment                            | Conclusion of Study-<br>Authors                                                                                                                                                                          | Remarks          |
|-----|-------------------------------------------------------|-----------------------------------------------------------------------------------------------------------------------------------------------------------------------------------------------------------------|----------------------------------------------------------------------------------------------------------------------------------------------|---------------------------------------------------------------------|-------------------------------------------------------------------------|-----------------------------------------------|---------------------------------------------------------------|--------------------------------------------------------------------------|----------------------------------------------------------------------------------------------------------------------------------------------------------------------------------------------------------|------------------|
| 102 | Karthikeyan<br>2010<br><br>[102]<br><br>Great Britain | I: 40 mg Methylprednisolone<br><br>C: 20 mg Tenoxicam<br><br>F&D: One Single Shot                                                                                                                               | A: >18<br><br>D: >3<br>I: 8 (2-12)<br>C: 10 (2.12)                                                                                           | 58 [58]<br><br>I: 27/26<br>C: 31/30                                 | Ø<br><br>I: 60<br>(36-88)<br>C: 58 (36-<br>75)                          | 26/32<br><br>I: 11/16<br>C: 15/16             | Painful Arc<br><br>Hawkins –<br>Kennedy                       | Constant<br>DASH<br>OSS<br><br>T1/T2                                     | “A single sub-acromial<br>corticosteroid injection of<br>40 mg of<br>methylprednisolone<br>provided a significantly<br>better outcome than a<br>single injection of 20 mg<br>of Tenoxicam.”              |                  |
| 103 | Kassolik<br>2013<br><br>[103]<br><br>Poland           | I: Classical Swedish Massage<br><br>C: Massage based on Tensegrity Principle<br><br>F&D: 10 Sessions in 2 weeks, each lasted<br>20 min.                                                                         | A: >18<br><br>D: <3                                                                                                                          | 47 [35]<br><br>I: 15<br>C: 15                                       | Ø<br><br>Not<br>Specified                                               | Not<br>specified                              | Painful Arc                                                   | AROM<br>McGill PQ<br><br>T1/T2                                           | “Increases in passive<br>and active ROMs for<br>flexion and abduction in<br>patients who had<br>massage based on the<br>tensegrity principle<br>compared with those<br>who received classic<br>massage.” |                  |
| 104 | Kaya<br>2011<br><br>[104]<br><br>Turkey               | I: Kinesiotaping and Home Exercise<br><br>C: Physiotherapy (US + TENS +Hot Pack) +<br>Home Exercise<br><br>F&D: 3 tapes in 2 weeks or Program for 2<br>wks.                                                     | A: 18-70<br><br>D: >6<br>I: 6.3 (4.3)<br>C: 7.2 (4.9)                                                                                        | 60 [60]<br><br>I: 30<br>C: 30                                       | Ø<br><br>I: 56.2<br>(7.2)<br>C: 59.5<br>(7.9)                           | Not<br>specified                              | Painful Arc<br>Empty can<br><br>Hawkins–<br>Kennedy           | DASH<br>VAS<br><br>T1                                                    | “Kinesiotaping (KT) has<br>been found to be more<br>effective than the local<br>modalities at the first<br>week and was similarly<br>effective at the second<br>week of the treatment.”                  |                  |
| 105 | Kaya<br>2014<br><br>[105]<br><br>Turkey               | I: Exercise + Manual Therapy<br><br>C: Exercise + Kinesiotaping<br><br>F&D: 6 wks. of related Interventions                                                                                                     | A: 30-60<br><br>D:<br>I: 6-28<br>C: 6-26                                                                                                     | 89 [60]<br><br>I: 26<br>C: 28                                       | Ø<br><br>I: 47.15<br>(9.44)<br>C: 50.85<br>(5.17)                       | 33/21<br><br>I: 16/10<br>C: 17/11             | Hawkins-<br>Kennedy<br>Neer<br><br>Painful Arc<br>Sulcus Sign | DASH<br>VAS<br><br>T1                                                    | “Kinesiotaping may have<br>an adjunct effect of<br>reducing night pain.”                                                                                                                                 |                  |
| 106 | Kelle<br>2014<br><br>[106]<br><br>Turkey              | 1: Steroid + Home Exercise<br><br>2: Low Level Laser Therapy + Home<br>Exercise<br><br>3: Sham Laser + Home Exercise<br><br>F&D: 2 Injection with Interval of 10 Days<br>2 and 3: 9 Sessions of Low Level Laser | A: >18<br><br>D: >3<br>1:16.6 (1-<br>120)<br>2: 18.7 (1-<br>120)<br>3: 15.0 (2-<br>120)                                                      | 135 [135]<br><br>1: 45/45<br>2.: 45/38<br>3.: 45/31                 | Ø<br><br>1: 48.7<br>(18-77)<br>2: 50.7<br>(29-74)<br>3: 48.0<br>(19-76) | 105/30<br><br>1: 35/10<br>2: 36/9<br>2: 34/11 | Impingement<br>Test<br><br>Neer<br><br>MRI<br>(stage I/II)    | Nottingha<br>m health<br>profile<br>(NHP)<br>UCLA<br>VAS<br><br>T1/T3/T4 | „Study demonstrated the<br>positive effects of both<br>low-level laser treatment<br>and local corticosteroid<br>injection in patients with<br>SIS.“                                                      | <b>Female: +</b> |

| ID  | Authors<br>Year<br>Reference<br>Country       | INTERVENTION/CONTROLS:<br>I: INTERVENTIONS<br>C: CONTROLS<br>1: GROUP 1<br>2: GROUP 2<br>3: GROUP 3<br>4: GROUP 4<br>5: GROUP 5<br><br>F&D: Frequency of Treatment, Duration of Treatment Period | Clinical Aspects:<br><br>A: Inclusion Age<br>D: Duration of Symptoms (months if not stated otherwise)<br>Co:<br>Comment | N: Included [Randomized]<br><br>Analysed :<br>I:<br>C: | Mean age (SD, Range)                      | Female/Male                       | Inclusion based on Test to confirm Diagnosis                               | Relevant Outcome/ Time of assessment     | Conclusion of Study- Authors                                                                                                                                                                                                                                               | Remarks                                                    |
|-----|-----------------------------------------------|--------------------------------------------------------------------------------------------------------------------------------------------------------------------------------------------------|-------------------------------------------------------------------------------------------------------------------------|--------------------------------------------------------|-------------------------------------------|-----------------------------------|----------------------------------------------------------------------------|------------------------------------------|----------------------------------------------------------------------------------------------------------------------------------------------------------------------------------------------------------------------------------------------------------------------------|------------------------------------------------------------|
| 107 | Kesikburun<br>2013<br><br>[107]<br><br>Turkey | I: Platelet-Rich Plasma Injection + Exercise<br><br>C: Saline Injection + Exercise<br><br>F&D: The exercise program lasted a total of 6 wks.                                                     | A: 18-70<br><br>D: >3<br>I: 8.5 (3-36)<br>C: 10 (2-48)                                                                  | 40 [40]<br><br>I: 20<br>C: 20                          | ∅<br><br>I: 45.5 (11.8)<br>C: 51.4 (10.0) | 27/13<br><br>I: 13/7<br>C: 14/6   | Pain on movement<br><br>Overhead throwing activity<br><br>MRI              | AROM<br>SPADI<br>WORC<br><br>T1/T2/T3/T5 | „Platelet rich plasma (PRP) injection was found to be no more effective in improving quality of life, pain, disability, and shoulder range of motion than placebo in patients with chronic RCT who were treated with an exercise program during a 1-year follow-up study.“ | <b>Female: +</b><br><br>No data Extractable                |
| 108 | Ketola<br>2009<br><br>[108]<br><br>Finland    | I: Supervised Exercise<br><br>C: Arthroscopy followed by a similar Exercise                                                                                                                      | A: 18-60<br><br>D: >3                                                                                                   | 140 [140]<br>I: 70<br>C: 70                            | ∅ 47.1 (23-60)                            | 88/52<br><br>I: 47/23<br>C: 41/29 | Clinical sign of shoulder impingement<br>Neer<br><br>Lidocaine test<br>MRI | SDQ<br>VAS<br><br>T5                     | „Structured exercise treatment seems to be the treatment of choice for SIS.“                                                                                                                                                                                               | <b>Female: +</b>                                           |
| 109 | Ketola<br>2013<br><br>[109]<br><br>Finland    | I: Supervised Exercise<br><br>C: Arthroscopy followed by a similar Exercise                                                                                                                      | A: 18-60<br><br>D: >3                                                                                                   | 140 [140]<br>I: 70<br>C: 70                            | ∅ 47.1 (23-60)                            | 88/52<br><br>I: 47/23<br>C: 41/29 | Clinical sign of shoulder impingement<br>Neer<br><br>Lidocaine test<br>MRI | SDQ<br>VAS<br><br>T6                     | „The effects of the arthroscopic acromioplasty may have been overestimated due to regression to the mean and the natural long-term course of the SIS.“                                                                                                                     | <b>Female: +</b><br><br>Follow up study from Ketola (2009) |
| 110 | Kibar<br>2016<br><br>[110]<br><br>Turkey      | I: Laser acupuncture<br><br>C: Sham laser acupuncture<br><br>F&D: 15 sessions in 3 wks.                                                                                                          | A: >18-70<br><br>D: >3                                                                                                  | 125 [73]<br><br>I: 36<br>C: 37                         | ∅<br><br>I: 64.5 (31-75)<br>C: 63 (32-70) | 43/19<br><br>I: 21/9<br>C: 22/10  | Hawkins–Kennedy<br>Neer<br><br>MRI<br>Stage I or II                        | AROM<br>SPADI<br>VAS<br><br>T1           | „The positive results of the present study should lead to further laser acupuncture studies with combinations of different acupuncture points, at different wavelengths, and with long-term follow-up periods.“                                                            | <b>Female: +</b>                                           |

| ID  | Authors<br>Year<br>Reference<br>Country       | INTERVENTION/CONTROLS:<br>I: INTERVENTIONS<br>C: CONTROLS<br>1: GROUP 1<br>2: GROUP 2<br>3: GROUP 3<br>4: GROUP 4<br>5: GROUP 5<br><br>F&D: Frequency of Treatment, Duration<br>of Treatment Period | Clinical<br>Aspects:<br><br>A: Inclusion<br>Age<br>D: Duration<br>of<br>Symptoms<br>(months if<br>not stated<br>otherwise)<br>Co:<br>Comment | N:<br>Included<br>[Random<br>ized]<br><br>Analysed<br>:<br>I:<br>C: | Mean<br>age (SD,<br>Range)                        | Female/<br>Male                   | Inclusion<br>based on Test<br>to confirm<br>Diagnosis                              | Relevant<br>Outcome/<br>Time of<br>assessment | Conclusion of Study-<br>Authors                                                                                                                                                                                | Remarks                                             |
|-----|-----------------------------------------------|-----------------------------------------------------------------------------------------------------------------------------------------------------------------------------------------------------|----------------------------------------------------------------------------------------------------------------------------------------------|---------------------------------------------------------------------|---------------------------------------------------|-----------------------------------|------------------------------------------------------------------------------------|-----------------------------------------------|----------------------------------------------------------------------------------------------------------------------------------------------------------------------------------------------------------------|-----------------------------------------------------|
| 111 | Kim<br>2012<br><br>[111]<br><br>South Korea   | I: Corticosteroid injection<br><br>C: Hyaluronate injection<br><br>F&D: Once a week for 3 wks.                                                                                                      | A: >40<br><br>D: >3<br><br>Co:<br>Comment                                                                                                    | 105 [105]<br><br>I: 42<br>C: 38                                     | ∅<br><br>I: 55.9<br>(7.9)<br>C: 54.1<br>(7.7)     | 52/28<br><br>I: 25/17<br>C: 27/11 | Hawkins–<br>Kennedy<br>Neer<br><br>US<br>MRI                                       | AROM<br>ASES<br>VAS<br><br>T1/T2/T3           | „Hyaluronate injection<br>can improve the<br>functional outcomes in<br>impingement syndrome<br>and can be a more<br>effective means of pain<br>relief than<br>corticosteroids, at least<br>in the short term.” | <b>Female: +</b>                                    |
| 112 | Kleinhenz<br>1999<br><br>[112]<br><br>Germany | I: Acupuncture<br><br>C: Placebo Needling<br><br>F&D: 8 Sessions in 4 wks.                                                                                                                          | A: 18-50<br><br>D: >1<br><br>Co: Athletes                                                                                                    | 109 [52]<br><br>I: 25<br>C: 27<br><br>I: 22<br>C: 23                | ∅<br><br>I: 33.72<br>(7.91)<br>C: 37.37<br>(10)   | 21/31<br><br>I: 12/13<br>C: 9/18  | RCT due to<br>sport<br><br>US<br>(Stage I or II)                                   | Modified<br>Constant<br><br>T1                | „Acupuncture with<br>penetration of the skin<br>was shown to be more<br>effective than a similar<br>therapeutic setting with<br>placebo needling in the<br>treatment of pain.”                                 | Same data<br>as in<br>Streitberger<br>et al. (2000) |
| 113 | Kocyigit,<br>2012<br><br>[113]<br><br>Turkey  | I: Low-Frequency TENS<br><br>C: Sham TENS<br><br>F&D: Within one treatment of 30 min.                                                                                                               | A: 25-65<br><br>D:<br>I: 5.5 (1.5-12)<br>C: 7.8 (1-24)                                                                                       | 20 [20]<br><br>I: 10<br>C: 10                                       | ∅<br><br>I: 49.2<br>(40-55)<br>C: 44.7<br>(24-64) | 12/8<br><br>I: 5/5<br>C: 7/3      | 3 positive<br>Tests:<br><br>Painful Arc<br><br>Hawkins–<br>Kennedy<br>Jobe<br>Neer | VAS<br><br>T1                                 | „We suggest that a 1-<br>Sessions low-frequency<br>TENS may induce<br>analgesic effect through<br>modulation of<br>discriminative, affective<br>and motor aspects of<br>central pain perception.”              |                                                     |
| 114 | Kocyigit,<br>2016<br><br>[114]<br><br>Turkey  | I: Kinesio Taping<br><br>C: Sham Taping<br><br>F&D: Taping was repeated every four days,<br>three times.                                                                                            | A: 18-70<br><br>D: wks.<br>(range 4-204)                                                                                                     | 55 [45]<br><br>I: 22 (21)<br>C: 23 (20)                             | ∅<br><br>I: 50.6<br>(10.1)<br>C: 49.2<br>(8.8)    | 28/13<br><br>I: 15/6<br>C: 13/7   | 3 positive<br>Tests:<br><br>Painful Arc<br><br>Hawkins–<br>Kennedy<br>Jobe<br>Neer | AROM<br>Constant<br>NHP<br>VAS<br><br>T1/T2   | „Kinesio Taping and sham<br>taping generated similar<br>results regarding pain and<br>Constant Scores.”                                                                                                        | <b>Female: +</b>                                    |

| ID  | Authors<br>Year<br>Reference<br>Country            | INTERVENTION/CONTROLS:<br>I: INTERVENTIONS<br>C: CONTROLS<br>1: GROUP 1<br>2: GROUP 2<br>3: GROUP 3<br>4: GROUP 4<br>5: GROUP 5<br><br>F&D: Frequency of Treatment, Duration<br>of Treatment Period | Clinical<br>Aspects:<br><br>A: Inclusion<br>Age<br>D: Duration<br>of<br>Symptoms<br>(months if<br>not stated<br>otherwise)<br>Co:<br>Comment | N:<br>Included<br>[Random<br>ized]<br><br>Analysed<br>:<br>I:<br>C: | Mean<br>age (SD,<br>Range)                                            | Female/<br>Male                   | Inclusion<br>based on Test<br>to confirm<br>Diagnosis                 | Relevant<br>Outcome/<br>Time of<br>assessment | Conclusion of Study-<br>Authors                                                                                                                                                                                                                                                                      | Remarks                                            |
|-----|----------------------------------------------------|-----------------------------------------------------------------------------------------------------------------------------------------------------------------------------------------------------|----------------------------------------------------------------------------------------------------------------------------------------------|---------------------------------------------------------------------|-----------------------------------------------------------------------|-----------------------------------|-----------------------------------------------------------------------|-----------------------------------------------|------------------------------------------------------------------------------------------------------------------------------------------------------------------------------------------------------------------------------------------------------------------------------------------------------|----------------------------------------------------|
| 115 | Krischak<br>2013<br><br>[115]<br><br>Great Britain | I: Occupational Therapy<br><br>C: Home Based Exercise Therapy<br><br>F&D: 3x/week for 8 wks.<br>Exercise: Guide Booklet                                                                             | A: 18 -75<br><br>D: >6<br><6 mos.: 6/10<br>>6 mos.: 4/4<br><br>Co:<br>Unilateral,<br>Full<br>Thickness<br>Tear                               | 65 [43]<br><br>I: 23<br>C: 20<br><br>I: 22<br>C: 16                 | Ø<br><br>I: 53.7<br>(12.9)<br>C: 56.4<br>(10.8)                       | 12/24<br><br>I: 8/8<br>C: 4/16    | One positive<br>Sign of<br>Impingement                                | AROM<br>Constant<br>VAS<br><br>T1             | “Using home-based<br>exercises, improvements<br>in pain, ROM, and<br>strength, comparable to<br>prescribed occupational<br>therapy, can be<br>expected.”                                                                                                                                             | <b>Unilateral</b>                                  |
| 116 | Kromer<br>2013<br><br>[116]<br><br>Germany         | I: Individually Adapted Exercises (IAEX) +<br>Individualized Manual Physiotherapy (IMPT)<br><br>C: Individually Adapted Exercises (IAEX)<br>only<br><br>F&D: 10 Sessions in 5 wks.                  | A: 18-75<br><br>D: >4 wks.<br><br>I: 27.4 (28.4)<br>C: 40.8 (53.4)                                                                           | 188 [90]<br><br>I: 46<br>C: 44                                      | Ø<br><br>I: 50.1<br>(12,2)<br>C: 53.7<br>(9.9)                        | 46/44<br><br>I: 22/24<br>C: 24/20 | Painful Arc<br>Resistance<br>Test<br><br>Hawkins –<br>Kennedy<br>Neer | SPADI<br>VAS<br><br>T1/T2                     | „Individually adapted<br>exercises were effective<br>in the treatment of<br>patients with shoulder<br>impingement syndrome.<br>Individualized manual<br>physiotherapy<br>contributed only a minor<br>amount to the<br>improvement in pain.“                                                          |                                                    |
| 117 | Kromer<br>2014<br><br>[117]<br><br>Germany         | I: Individually Adapted Exercises (IAEX) +<br>Individualized Manual Physiotherapy (IMPT)<br><br>C: Individually Adapted Exercises (IAEX)<br>only<br><br>F&D: 10 Sessions in 5 wks.                  | A: 18-75<br><br>D: >4 wks.<br><br>I: 27.4 (28.4)<br>C: 40.8 (53.4)                                                                           | 188 [90]<br><br>I: 46<br>C: 44                                      | Ø<br><br>I: 50.1<br>(12,2)<br>C: 53.7<br>(9.9)                        | 46/44<br><br>I: 22/24<br>C: 24/20 | Painful Arc<br>Resistance<br>Test<br><br>Hawkins –<br>Kennedy<br>Neer | SPADI<br>VAS<br><br>T5                        | „Although the results of<br>this study suggest that<br>additionally applied<br>manual interventions are<br>of no benefit. Exercises<br>should be considered a<br>basic treatment, because<br>they are less expensive<br>and carry less risk than,<br>for example, shock-wave<br>therapy or surgery.“ | Follow up<br>study from<br>Kromer et<br>al. (2013) |
| 118 | Kurtais<br>2004<br><br>[118]<br><br>Turkey         | I: US + Hot Packs + Electrotherapy +<br>Exercise<br><br>C: Sham Us + Hot Packs + Electrotherapy +<br>Exercise<br><br>F&D: 15 Sessions in 3 wks.                                                     | A: Not<br>Specified<br><br>D: >4 wks.<br><br>I: 8.68 (8.84)<br>(1-36)<br>C: 8.11<br>(10.81)<br>(1-42)                                        | 40 [40]<br><br>I: 19<br>C: 19                                       | Ø<br><br>I: 54.16<br>(8.22)<br>(38-69)<br>C: 54.0<br>(9.8)<br>(35-69) | 26/12<br><br>I: 12/7<br>C: 14/5   | Painful<br>shoulder<br><br>MRI/US                                     | HAQ<br>SDQ<br>VAS<br><br>T1                   | „It is apparent that<br>adding US to a well-<br>planned intervention<br>regimen has no benefit.“                                                                                                                                                                                                     | <b>Female: +</b>                                   |

| ID  | Authors<br>Year<br>Reference<br>Country         | INTERVENTION/CONTROLS:<br>I: INTERVENTIONS<br>C: CONTROLS<br>1: GROUP 1<br>2: GROUP 2<br>3: GROUP 3<br>4: GROUP 4<br>5: GROUP 5<br><br>F&D: Frequency of Treatment, Duration<br>of Treatment Period                                                                                                                | Clinical<br>Aspects:<br><br>A: Inclusion<br>Age<br>D: Duration<br>of<br>Symptoms<br>(months if<br>not stated<br>otherwise)<br>Co:<br>Comment | N:<br>Included<br>[Random<br>ized]<br><br>Analysed<br>:<br>I:<br>C: | Mean<br>age (SD,<br>Range)                                                 | Female/<br>Male                                 | Inclusion<br>based on Test<br>to confirm<br>Diagnosis | Relevant<br>Outcome/<br>Time of<br>assess-<br>ment | Conclusion of Study-<br>Authors                                                                                                                                                                                                                                                                                        | Remarks           |
|-----|-------------------------------------------------|--------------------------------------------------------------------------------------------------------------------------------------------------------------------------------------------------------------------------------------------------------------------------------------------------------------------|----------------------------------------------------------------------------------------------------------------------------------------------|---------------------------------------------------------------------|----------------------------------------------------------------------------|-------------------------------------------------|-------------------------------------------------------|----------------------------------------------------|------------------------------------------------------------------------------------------------------------------------------------------------------------------------------------------------------------------------------------------------------------------------------------------------------------------------|-------------------|
| 119 | Lee<br>2011<br><br>[119]<br><br>Korea           | I: Botulinum Toxin (BT)<br><br>C: Steroids injection (2 mL 0.5 % Lidocaine<br>and Triamcinolone 40 mg)<br><br>F&D: One single Injection                                                                                                                                                                            | A: Not<br>Specified<br><br>D: >2<br><br>1.8.2 (5.5)<br>2.8.2                                                                                 | 97 [61]<br><br>I: 31<br>C: 30<br><br>ITT                            | ∅<br><br>I: 57.9<br>(10.1)<br>2. 55.8<br>(9.1)                             | 36/25<br><br>I: 17/14<br>C: 19/11               | Hawkins –<br>Kennedy<br>Neer                          | DASH<br>NRS<br><br>T2/T3                           | „Botulinum toxin (BT)<br>Type B showed more<br>persistent clinical<br>benefits in pain reduction<br>and functional<br>improvement than<br>steroid in patients with<br>SB or SIS. These results<br>suggest that BT type B<br>could be a useful<br>strategy for re-placing<br>steroids as a treatment<br>for SB or SIS.“ |                   |
| 120 | Lewis<br>2005<br><br>[120]<br><br>Great Britain | I: Thoracic and Scapular Taping intended to<br>change their Posture.<br><br>C: Thoracic and Scapular Sham Taping<br>intended to change their Posture.<br><br>F&D: One hour passive washout period<br>between the two protocols.                                                                                    | A: 18-75<br><br>D: >1 wk.<br>Years.<br>I: 1.5 (4.0)<br>(0.1-22)<br>C: 0.8 (1.0)<br>(0.4-5.0)                                                 | 60 [60]<br><br>I: 30<br>C: 30                                       | ∅<br><br>I: 47.9<br>(15.3)<br>C. 49.9<br>(5.1)                             | 25/35<br><br>I: 13/17<br>C: 12/18               | Painful Arc<br><br>Hawkins –<br>Kennedy<br>Neer       | AROM<br>VAS<br><br>T1                              | „There may be a short-<br>term improvement in the<br>range of shoulder flexion<br>and scapular plane<br>abduction in<br>asymptomatic subjects<br>and those with SIS.“                                                                                                                                                  | <b>Unilateral</b> |
| 121 | Lewis<br>2016<br><br>[121]<br><br>Great Britain | 1: Shoulder advice and weekly exercise<br>group<br><br>2: Shoulder advice and weekly exercise<br>group and 6 acupuncture sessions<br><br>3: Shoulder advice and weekly exercise<br>group and 6 electro-acupuncture sessions<br><br>F&D: (Six 50-55 min. sessions), once a<br>week for 6 weeks as a circuit program | A: >18<br><br>D:<br><br>Median/range<br>1: 6 (4-12)<br>2: 6 (4-12)<br>3: 6 (3-12)                                                            | 227 [227]<br><br>1: 73<br>2: 77<br>3: 77                            | ∅<br><br>1: 54.47<br>(13.24)<br>2. 52.08<br>(14.35)<br>3: 53.95<br>(12.89) | 118/109<br><br>1: 40/33<br>2. 41/36<br>3: 37/40 | Painful Arc<br><br>Hawkins –<br>Kennedy<br>Neer       | AROM<br>OSS<br>SPADI<br><br>T1/T4/T5               | „Neither acupuncture nor<br>electro-acupuncture were<br>found to be more<br>beneficial than exercise<br>alone in the treatment of<br>subacromial pain<br>syndrome. These findings<br>may support clinicians<br>with treatment planning.“                                                                               | <b>Unilateral</b> |

| ID  | Authors<br>Year<br>Reference<br>Country              | INTERVENTION/CONTROLS:<br>I: INTERVENTIONS<br>C: CONTROLS<br>1: GROUP 1<br>2: GROUP 2<br>3: GROUP 3<br>4: GROUP 4<br>5: GROUP 5<br><br>F&D: Frequency of Treatment, Duration of Treatment Period | Clinical Aspects:<br><br>A: Inclusion Age<br>D: Duration of Symptoms (months if not stated otherwise)<br>Co:<br>Comment | N: Included [Randomized]<br><br>Analysed :<br>I:<br>C: | Mean age (SD, Range)                                     | Female/ Male                      | Inclusion based on Test to confirm Diagnosis                                       | Relevant Outcome/ Time of assessment | Conclusion of Study- Authors                                                                                                                                                                                                                                              | Remarks            |
|-----|------------------------------------------------------|--------------------------------------------------------------------------------------------------------------------------------------------------------------------------------------------------|-------------------------------------------------------------------------------------------------------------------------|--------------------------------------------------------|----------------------------------------------------------|-----------------------------------|------------------------------------------------------------------------------------|--------------------------------------|---------------------------------------------------------------------------------------------------------------------------------------------------------------------------------------------------------------------------------------------------------------------------|--------------------|
| 122 | Littlewood<br>2014<br><br>[122]<br><br>Great Britain | I: Self-Managed Exercise Group<br><br>C: Usual Physiotherapy Treatment Group<br><br>F&D: 4 or 8 funded Sessions in 4 wks.                                                                        | A: >18<br><br>D: >3<br>38.6 (3-168)<br>I: 29 (3-120)<br>C: 49 (3-168)                                                   | 45 [24]<br><br>I: 12<br>C: 12                          | Ø 63.2 (44-79)<br><br>I: 62.6 (46-76)<br>C: 63.9 (44-79) | 12/12<br><br>I: 7/5<br>C: 5/7     | Painful Arc Isometric tests                                                        | SPADI SF-36<br><br>T3                | „This pilot RCT appear to offer a suitable foundation upon which to conduct a substantive study to evaluate the clinical and cost-effectiveness of a self-managed exercise program versus usual physiotherapy treatment for chronic rotator cuff disorders/tendinopathy.“ | <b>Pilot study</b> |
| 123 | Littlewood<br>2015<br><br>[123]<br><br>Great Britain | I: Self-Managed Exercise Group<br><br>C: Usual Physiotherapy Treatment Group<br><br>F&D: 4 or 8 funded Sessions in 4 wks.                                                                        | A: >18<br><br>D: >3<br>I: 11.7 (3-78)<br>C: 17.3 (3-120)                                                                | 86 [86]<br><br>I: 42<br>C: 44                          | Ø 63.2 (44-79)<br><br>I: 53.8 (23-83)<br>C: 55.6 (23-80) | 43/43<br><br>I: 25/17<br>C: 18/26 | Painful Arc Isometric tests                                                        | SPADI SF-36<br><br>T3                | „This study does not provide sufficient evidence of superiority of one intervention over the other in the short-, mid- or long-term and hence a self-management programme based around a single exercise appears comparable to usual physiotherapy treatment.“            |                    |
| 124 | Lombardi<br>2008<br><br>[124]<br><br>Brasil          | I: Progressive Resistance Training<br><br>C: Waiting List and then started Program 2 month later<br><br>F&D: Twice a week for 8 wks.                                                             | A: Not Specified<br><br>D: >2<br><br>I: 13.9 (2.6)<br>C: 13.7 (9.6)                                                     | 60 [60]<br><br>I: 30<br>C: 30                          | Ø<br><br>I: 56.3 (11.6)<br>2. 54.8 (9.4)                 | 46/14<br><br>I: 21/9<br>C: 25/5   | Hawkins–Kennedy Neer                                                               | DASH VAS<br><br>T2                   | „Who underwent progressive resistance training exhibited improvements regarding pain and function.“                                                                                                                                                                       | <b>Female: +</b>   |
| 125 | Ludewig<br>2003<br><br>[125]<br><br>USA              | I: Therapeutic Exercise Program<br><br>C: Control Group<br><br>F&D: Exercise program for 3 wks.                                                                                                  | A: Not Specified<br><br>D: Not Specified<br><br>Co: Construction workers                                                | 77 [77]<br><br>I: 34<br>C: 33                          | Ø<br><br>I: 48.0 (1.8)<br>C: 49.2 (1.8)                  | 98% male<br><br>2/75              | Overhead work<br><br>Painful Arc Resisted tests<br><br>Hawkins – Kennedy Jobe Neer | SRQ SPADI<br><br>T1                  | „Home exercise program showed significant positive improvements in shoulder function and reductions in symptoms for construction workers with routine exposure to overhead work.“                                                                                         | Male: +            |

| ID  | Authors<br>Year<br>Reference<br>Country       | INTERVENTION/CONTROLS:<br>I: INTERVENTIONS<br>C: CONTROLS<br>1: GROUP 1<br>2: GROUP 2<br>3. GROUP 3<br>4. GROUP 4<br>5. GROUP 5<br><br>F&D: Frequency of Treatment, Duration<br>of Treatment Period       | Clinical<br>Aspects:<br><br>A: Inclusion<br>Age<br>D: Duration<br>of<br>Symptoms<br>(months if<br>not stated<br>otherwise)<br>Co:<br>Comment | N:<br>Included<br>[Random<br>ized]<br><br>Analysed<br>:<br>I:<br>C: | Mean<br>age (SD,<br>Range)                      | Female/<br>Male                      | Inclusion<br>based on Test<br>to confirm<br>Diagnosis                                                       | Relevant<br>Outcome/<br>Time of<br>assessment            | Conclusion of Study-<br>Authors                                                                                                                                                                                                                                                                        | Remarks                                                |
|-----|-----------------------------------------------|-----------------------------------------------------------------------------------------------------------------------------------------------------------------------------------------------------------|----------------------------------------------------------------------------------------------------------------------------------------------|---------------------------------------------------------------------|-------------------------------------------------|--------------------------------------|-------------------------------------------------------------------------------------------------------------|----------------------------------------------------------|--------------------------------------------------------------------------------------------------------------------------------------------------------------------------------------------------------------------------------------------------------------------------------------------------------|--------------------------------------------------------|
| 126 | Maenhout<br>2013<br><br>[126]<br><br>Belgium  | I: Traditional Training (TT) + Heavy-Load<br>Eccentric<br><br>C: Traditional rotator cuff strength training<br>(TT)<br><br>F&D: 1 Sessions a week (30min) for 6<br>weeks, every other week till 3 months. | A: >18<br><br>D: >3                                                                                                                          | 83 [61]<br><br>I: 31<br>C: 30                                       | Ø<br><br>1: 40.2<br>(12.9)<br>2: 39.4<br>(13.1) | 36/25<br><br>I: 16/15<br>2: 20/10    | 2 of 3 Tests<br>positive:<br><br>Painful Arc<br>Resisted testing<br><br>Hawkins–<br>Kennedy<br>Jobe<br>Neer | SPADI<br><br>T1                                          | „Supports the integration<br>of an eccentric training<br>program into a<br>multimodal rehabilitation<br>program. In addition, this<br>study provided evidence<br>that combining a limited<br>amount of physiotherapy<br>treatment Sessions with<br>a home exercise<br>program is highly<br>effective.“ |                                                        |
| 127 | Martins<br>2012<br><br>[127]<br><br>Brasil    | I: Physiotherapy (Strength + Stretch +<br>Cryotherapy)<br><br>C: Additional Proprioceptive Exercises<br><br>F&D: 2 Sessions weekly for six wks.                                                           | A: Not<br>Specified<br><br>D: Not<br>Specified                                                                                               | 20 [18]<br><br>I: 8<br>C: 8                                         | Ø<br><40yrs:                                    | 14/2<br><br>I: 7/1<br>C: 7/1         | Impingement<br>sign                                                                                         | WORC<br>OSI<br>VNS<br><br>Not<br>Specified               | „The proprioceptive<br>exercises were important<br>in the treatment of<br>musculoskeletal<br>disorders, however the<br>results did not allow us to<br>determine which<br>treatment was the most<br>effective.“                                                                                         | Small<br>Sample<br>Study<br><br>No data<br>Extractable |
| 128 | Marzetti<br>2014<br><br>[128]<br><br>Italy    | I: Neurocognitive therapeutic exercise<br><br>C: Traditional therapeutic exercise<br><br>F&D: 3 Sessions per week for 5 wks.                                                                              | A: >18<br><br>D: >3<br>Not specified                                                                                                         | 76 [48]<br><br>I: 24<br>C: 24<br><br>ITT<br>1: 24<br>2: 24          | Ø<br><br>1: 62.6<br>(13.9)<br>2: 61.6<br>(11.2) | 27/21<br><br>I: 15/9<br>C: 12<br>/12 | Resisted testing<br><br>Hawkins-<br>Kennedy<br>Neer<br><br>MRI                                              | ASES<br>Constant<br>Quick<br>DASH<br>VAS<br><br>T1/T3/T4 | „Pain, range of motion,<br>skills and function of the<br>shoulder can greatly<br>benefit from<br>neurocognitive<br>rehabilitation.“                                                                                                                                                                    |                                                        |
| 129 | McClatchie<br>2009<br><br>[129]<br><br>Canada | I: Cervical glide mobilization<br><br>C: Placebo<br><br>F&D: Both treatments within two days                                                                                                              | A: >18<br><br>D: >6 wks.<br><br>Co: Unilateral<br>pain below<br>43 %                                                                         | 21 [21]<br><br>I: 7<br>C: 14<br><br>I: 14<br>C: 7                   | Ø 49.8<br>(9.8)                                 | 14/7                                 | Painful Arc                                                                                                 | AROM<br>VAS<br><br>T1                                    | „Cervical lateral glide<br>mobilizations can<br>decrease the intensity of<br>shoulder pain with<br>movement into shoulder<br>abduction, and this<br>treatment effect is<br>beyond placebo.“                                                                                                            | <b>Female: +</b><br><br>Crossover                      |



| ID  | Authors<br>Year<br>Reference<br>Country      | INTERVENTION/CONTROLS:<br>I: INTERVENTIONS<br>C: CONTROLS<br>1: GROUP 1<br>2: GROUP 2<br>3: GROUP 3<br>4: GROUP 4<br>5: GROUP 5<br><br>F&D: Frequency of Treatment, Duration<br>of Treatment Period                                           | Clinical<br>Aspects:<br><br>A: Inclusion<br>Age<br>D: Duration<br>of<br>Symptoms<br>(months if<br>not stated<br>otherwise)<br>Co:<br>Comment | N:<br>Included<br>[Random<br>ized]<br><br>Analysed<br>:<br>I:<br>C: | Mean<br>age (SD,<br>Range)                                              | Female/<br>Male                              | Inclusion<br>based on Test<br>to confirm<br>Diagnosis | Relevant<br>Outcome/<br>Time of<br>assessment | Conclusion of Study-<br>Authors                                                                                                                                                                                                                                        | Remarks                |
|-----|----------------------------------------------|-----------------------------------------------------------------------------------------------------------------------------------------------------------------------------------------------------------------------------------------------|----------------------------------------------------------------------------------------------------------------------------------------------|---------------------------------------------------------------------|-------------------------------------------------------------------------|----------------------------------------------|-------------------------------------------------------|-----------------------------------------------|------------------------------------------------------------------------------------------------------------------------------------------------------------------------------------------------------------------------------------------------------------------------|------------------------|
| 130 | Melchiorre<br>2014<br><br>[130]<br><br>Italy | 1: Muscle Shortening Manoeuvre<br><br>2: Traditional Physiotherapy<br><br>3: Control (Traction)<br><br>F&D:<br>1: Only once for 10 min.<br>2: 10 Sessions in 4 wks.                                                                           | A: >18-65<br><br>D: >6                                                                                                                       | 60 [60]<br><br>1: 20<br>2: 20<br>3: 20                              | Ø 58.6<br>(34-86)                                                       | 24/36                                        | Painful Arc<br><br>Neer sign                          | VAS<br><br>T1/T2                              | „Our results show that MSM is a simple, not invasive and efficient approach for mild SIS without tendon degeneration or rupture. This manoeuvre allows a rapid relief of pain with a persistent functional reset.“                                                     | No data<br>Extractable |
| 131 | Melegati<br>2000<br><br>[131]<br><br>Italy   | 1: Physiotherapy<br>2: ESWT and Physiotherapy<br>3: Postural Hygiene + Joint Economy<br><br>F&D:<br>1: Physiotherapy 6 times / 3 weeks interval<br>(Codman + Stretching + Resistance)<br>2: 3 ESWT in 3 wks. + 6 Sessions of<br>Physiotherapy | A: 18-65<br><br>D: Not<br>Specified                                                                                                          | 90 [90]<br><br>1 30<br>2: 30<br>3: 30                               | Ø<br><br>1 53.66<br>(7.36)<br>2: 53.66<br>(8.98)<br>3: 55.76<br>(13.08) | 59/31<br><br>1: 23/7<br>2: 17/13<br>3: 19/11 | Neer<br>(stage I/II)                                  | Constant<br><br>T5                            | „There is a rationale for the employment of ESWT in situations of this kind.“                                                                                                                                                                                          | <b>Female: +</b>       |
| 132 | Miller<br>2009<br><br>[132]<br><br>Australia | I: Taping with Routine Physiotherapy<br><br>C: Routine Physiotherapy only<br><br>F&D: 6 Tapes in 2 wks.                                                                                                                                       | A: 18-70<br><br>D: >6 wks.<br><br>Co:<br>Unilateral,<br>Pilot Study                                                                          | 22 [22]<br><br>I: 10<br>C: 12<br>I: 6<br>C: 11                      | Ø<br><br>I: 62 (51-<br>67)<br>C: 54.5<br>(45-62)                        | 12/10<br><br>I: 7/3<br>C: 5/7                | Hawkins –<br>Kennedy                                  | VAS<br>AROM<br>SPADI<br><br>T1/T2             | „Suggest a short-term role for scapula taping as an adjunctive treatment in the management of shoulder impingement problems.“                                                                                                                                          |                        |
| 133 | Min<br>2013<br><br>[133]<br><br>USA          | I: Injection of 60 mg Ketorolac<br><br>C: Injection of 40 mg Triamcinolone<br><br>F&D: One Single Injection                                                                                                                                   | A: >18.<br><br>D: >1<br>Not Specified                                                                                                        | 48 [48]<br><br>I: 17<br>C: 15                                       | Ø<br><br>I: 39.6<br>(9.4)<br>C: 39.1<br>(10.5)                          | 7/25<br><br>I: 4/13<br>C: 3/12               | Hawkins–<br>Kennedy<br>Neer<br><br>Painful Arc        | VAS<br>UCLA<br><br>T2                         | „While both triamcinolone and ketorolac are effective in the treatment of isolated subacromial impingement, ketorolac appears to have equivalent if not superior efficacy all the while decreasing patient exposure to the potential side-effects of corticosteroids.“ | Male: +                |

| ID  | Authors<br>Year<br>Reference<br>Country             | INTERVENTION/CONTROLS:<br>I: INTERVENTIONS<br>C: CONTROLS<br>1: GROUP 1<br>2: GROUP 2<br>3: GROUP 3<br>4: GROUP 4<br>5: GROUP 5<br><br>F&D: Frequency of Treatment, Duration<br>of Treatment Period | Clinical<br>Aspects:<br><br>A: Inclusion<br>Age<br>D: Duration<br>of<br>Symptoms<br>(months if<br>not stated<br>otherwise)<br>Co:<br>Comment | N:<br>Included<br>[Random<br>ized]<br><br>Analysed<br>:<br>I:<br>C: | Mean<br>age (SD,<br>Range)                         | Female/<br>Male                   | Inclusion<br>based on Test<br>to confirm<br>Diagnosis                                                                     | Relevant<br>Outcome/<br>Time of<br>assessment     | Conclusion of Study-<br>Authors                                                                                                                                                                                  | Remarks                                   |
|-----|-----------------------------------------------------|-----------------------------------------------------------------------------------------------------------------------------------------------------------------------------------------------------|----------------------------------------------------------------------------------------------------------------------------------------------|---------------------------------------------------------------------|----------------------------------------------------|-----------------------------------|---------------------------------------------------------------------------------------------------------------------------|---------------------------------------------------|------------------------------------------------------------------------------------------------------------------------------------------------------------------------------------------------------------------|-------------------------------------------|
| 134 | Moezy<br>2014<br><br>[134]<br><br>Iran              | I: Exercise Therapy<br><br>C: Physical Therapy<br><br>F&D: 18 Sessions                                                                                                                              | A: 18-75<br><br>D:<br>I: 5.31 (4.46)<br>C: 6.64 (4.08)                                                                                       | 98 [72]<br><br>I: 36 (33)<br>C: 36 (35)                             | ∅<br><br>I: 47.77<br>(7.85)<br>C: 48.15<br>(13.81) | 55/13<br><br>I: 25/8<br>C: 30/3   | Hawkins<br>Neer<br><br>Painful Arc<br><br>Impingement<br>Test                                                             | AROM<br>VAS<br><br>T1                             | „The scapular<br>stabilization based<br>exercise intervention was<br>successful in increasing<br>shoulder range,<br>decreasing forward head<br>and shoulder postures<br>and m. pectoralis minor<br>flexibility.“ | <b>Female: +</b><br><br><b>Unilateral</b> |
| 135 | Moghtaderi<br>2013<br><br>[135]<br><br>Iran         | I: 20 mg of Sodium Hyaluronate<br>(Fermatron™)<br><br>C: Normal Saline 0.9%<br><br>F&D: Once weekly for 3 wks.                                                                                      | A: 30-80<br><br>D: >6<br>Not Specified                                                                                                       | 40 [40]<br><br>I: 20<br>C: 20                                       | ∅<br><br>Not<br>specified                          | 26/14<br><br>I: 12/8<br>C: 14/6   | Hawkins–<br>Kennedy<br><br>Neer<br>Shoulder pain<br><br>US: Pathology                                                     | Constant<br>VAS<br><br>T1<br><br>T3<br>(Constant) | „Case group had<br>significantly better<br>constant scores than the<br>placebo group at the<br>12th week after the last<br>injection and<br>improvement of VAS<br>scores each week after<br>the injections.“     |                                           |
| 136 | Montes-<br>Molina<br>2012<br><br>[136]<br><br>Spain | I: Interferential Light Therapy<br><br>C: Conventional Light Therapy<br><br>F&D: 10 Sessions                                                                                                        | A: >18<br><br>D: Not<br>Specified                                                                                                            | 34 [30]<br><br>I: 13<br>C: 15                                       | ∅<br><br>I: 59.2<br>(11.0)<br>C: 59.0<br>(8.9)     | 22/8<br><br>I: 12/3<br>C: 10/5    | MRI<br>US                                                                                                                 | UCLA<br>VAS<br><br>T1                             | „This modality of light<br>therapy has resulted to<br>be useful in reducing<br>pain during some<br>shoulder analytical<br>movements, opening a<br>new way that deserves<br>to be explored.“                      | <b>Female: +</b><br><br><b>Unilateral</b> |
| 137 | Moosmayer<br>2010<br><br>[137]<br><br>Norway        | I: Surgery<br><br>C: Physiotherapeutic Exercise<br><br>F&D: Treatment Sessions of 40 min for 6-12<br>wks.                                                                                           | A: >18<br><br>D:<br>I: 12.3 (18.7)<br>C: 9.8 (9.8)<br><br>Co:<br>Traumatic<br>and non-<br>traumatic<br>tears                                 | 103 [103]<br><br>I: 52/51<br>C: 51/42                               | ∅<br><br>I: 59 (44-<br>75)<br>C: 61 (46-<br>75)    | 30/73<br><br>I: 15/37<br>C: 15/36 | Painful Arc<br>Impingement<br>sign<br>Passive range<br>>140 °<br><br>MRI: (Stage II)<br>US/MRI:<br>Full thickness<br>tear | ASES<br>Constant<br><br>T4/T5                     | „Larger treatment<br>benefits in terms of<br>outcome scores after<br>one year were found for<br>surgical treatment of<br>rotator cuff tears<br>compared to<br>physiotherapy.“                                    | Male: +                                   |

| ID  | Authors<br>Year<br>Reference<br>Country         | INTERVENTION/CONTROLS:<br>I: INTERVENTIONS<br>C: CONTROLS<br>1: GROUP 1<br>2: GROUP 2<br>3: GROUP 3<br>4: GROUP 4<br>5: GROUP 5<br><br>F&D: Frequency of Treatment, Duration of Treatment Period | Clinical Aspects:<br><br>A: Inclusion Age<br>D: Duration of Symptoms (months if not stated otherwise)<br>Co:<br>Comment | N:<br>Included [Randomized]<br><br>Analysed :<br>I:<br>C: | Mean age (SD, Range)                                 | Female/<br>Male                   | Inclusion based on Test to confirm Diagnosis                                                                  | Relevant Outcome/<br>Time of assessment  | Conclusion of Study-<br>Authors                                                                                                                                                                          | Remarks                      |
|-----|-------------------------------------------------|--------------------------------------------------------------------------------------------------------------------------------------------------------------------------------------------------|-------------------------------------------------------------------------------------------------------------------------|-----------------------------------------------------------|------------------------------------------------------|-----------------------------------|---------------------------------------------------------------------------------------------------------------|------------------------------------------|----------------------------------------------------------------------------------------------------------------------------------------------------------------------------------------------------------|------------------------------|
| 138 | Moosmayer<br>2014<br><br>[138]<br><br>Norway    | I: Surgery<br><br>C: Physiotherapeutic Exercise<br><br>F&D: Treatment Sessions of 40 min for 6-12 wks.                                                                                           | A: >18<br><br>D:<br>I: 12.3 (18.7)<br>C: 9.8 (9.8)<br><br>Co:<br>Traumatic and non traumatic tears                      | 103 [103]<br><br>I: 52/51<br>C: 51/42                     | Ø<br><br>I: 59 (7.5)<br>C: 61 (7.6)                  | 30/73<br><br>I: 15/37<br>C: 15/36 | Painful Arc Impingement sign<br>Passive range >140 °<br><br>MRI: (Stage II)<br>US/MRI:<br>Full thickness tear | ASES<br>Constant<br><br>T4/T5            | „Although primary repair of small and medium-sized rotator cuff tears was associated with better outcome than physiotherapy treatment, the differences were small and may be below clinical importance.“ | Male: +                      |
| 139 | Mulligan<br>2016<br><br>[139]<br><br>USA        | I: Comprehensive rehabilitation program including scapular + rotator cuff exercises<br><br>C: Standardized rotator cuff exercises<br><br>F&D: 4 week program/ crossover                          | A: 18-80<br><br>D: wks.<br>I: 40.0 (34.3)<br>C: 29.2 (29.9)<br><br>Co: crossover                                        | 270 [50]<br>40<br><br>I: 25/20<br>C: 25/20                | Ø<br><br>I: 50.8 (11.1)<br>C: 49.4 (10.6)            | 26/25<br><br>I: 15/5<br>C: 11/9   | Hawkins–Kennedy<br>Neer<br>Painful Arc<br><br>Resisted testing<br><br>Stage I or II                           | ASES<br>NPRS<br><br>MRI<br><br>T1/T3     | „Patients with SAIS demonstrate improvement in pain and function with a standardized program of physical therapy regardless of group exercise sequencing.“                                               |                              |
| 140 | Munday<br>2007<br><br>[140]<br><br>South Africa | I: Shoulder Manipulation to acromioclavicular joint, rips, scapula + glenohumeral joint<br><br>C: Placebo Intervention (Detuned Ultrasound)<br><br>F&D: 8 Sessions in 3 wks.                     | A: <40<br><br>D: >6 wks.                                                                                                | 30 [30]<br><br>I: 15<br>C: 15                             | Ø<br><br>I: 22 (16-38)<br>C: 23 (19-32)              | 14/16                             | Hawkins–Kennedy<br>Jobe<br>Neer<br>Speed<br>Painful Arc<br><br>Stage I or II                                  | AROM<br>Mc Gill<br>Pain<br>VAS<br><br>T2 | „Chiropractic adjustment (manipulation) was superior to placebo in the short-term treatment (7 weeks) of SIS.“                                                                                           | For AROM no data Extractable |
| 141 | Naredo<br>2004<br><br>[141]<br><br>-Spain       | 1: Blind Injection of 20 mg Triamcinolone<br><br>2: US-guided Injection of 20 mg Triamcinolone<br><br>F&D: One Single Injection                                                                  | A: Not Specified<br><br>D: >1<br>I: 10.2 (1-70)<br>I: 10.2 (14.7)<br>C: 11.9 (14.9)                                     | 41 [41]<br><br>I: 20<br>2: 21                             | Ø 52.4 (24-76)<br><br>I: 51.9 (13.8)<br>C: 52.9 (11) | 27/14<br><br>I: 12/8<br>2: 15/6   | „Appropriate shoulder tests.“                                                                                 | SFA<br>VAS<br><br>T2                     | „Ultrasound guidance may be the method of choice for injection corticosteroid in patients with painful shoulder.“                                                                                        | Female: +                    |
| 142 | Nykanen<br>1995<br><br>[142]<br><br>Finland     | I: US + Physiotherapy in Rehab Centre<br><br>C: Placebo US + Physiotherapy in Rehab Centre<br><br>F&D: 10-12 Sessions in 3-4 wks.                                                                | A: 31-81<br><br>D: >2<br><br>Co:<br>58/ 72 (war veterans)                                                               | 73 [73]<br><br>I: 35<br>C: 37                             | Ø<br><br>I: 66 (6)<br>C: 67 (9)                      | 11/61<br><br>I: 6/29<br>C: 5/32   | Painful Arc<br>Painful movement                                                                               | Pain-Index<br>ADL- Index<br><br>T4/T5    | „Results discourage the adding of pulsed ultrasound therapy with the variables used to the conservative treatment of painful shoulders.“                                                                 | Male: +                      |

| ID  | Authors<br>Year<br>Reference<br>Country    | INTERVENTION/CONTROLS:<br>I: INTERVENTIONS<br>C: CONTROLS<br>1: GROUP 1<br>2: GROUP 2<br>3: GROUP 3<br>4: GROUP 4<br>5: GROUP 5<br><br>F&D: Frequency of Treatment, Duration<br>of Treatment Period                  | Clinical<br>Aspects:<br><br>A: Inclusion<br>Age<br>D: Duration<br>of<br>Symptoms<br>(months if<br>not stated<br>otherwise)<br>Co:<br>Comment | N:<br>Included<br>[Random<br>ized]<br><br>Analysed<br>:<br>I:<br>C: | Mean<br>age (SD,<br>Range)                       | Female/<br>Male                   | Inclusion<br>based on Test<br>to confirm<br>Diagnosis     | Relevant<br>Outcome/<br>Time of<br>assessment | Conclusion of Study-<br>Authors                                                                                                                                                                                                                                                                                                             | Remarks                                               |
|-----|--------------------------------------------|----------------------------------------------------------------------------------------------------------------------------------------------------------------------------------------------------------------------|----------------------------------------------------------------------------------------------------------------------------------------------|---------------------------------------------------------------------|--------------------------------------------------|-----------------------------------|-----------------------------------------------------------|-----------------------------------------------|---------------------------------------------------------------------------------------------------------------------------------------------------------------------------------------------------------------------------------------------------------------------------------------------------------------------------------------------|-------------------------------------------------------|
| 143 | Osteras<br>2010<br><br>[143]<br><br>Norway | I: High Dosage Exercise<br><br>C: Low Dosage Exercise<br><br>F&D: 3 Sessions weekly for 12 wks.                                                                                                                      | A: 18–60<br><br>D: >3<br><br>I: 3.6 (5.1)<br>C: 3.1 (4.3)<br><br>Co: Unilateral                                                              | 90 [61]<br><br>I: 31<br>C: 30<br><br>T5<br>I: 15<br>C: 23           | ∅<br><br>I: 46.1<br>(11.2)<br>C: 41.8<br>(14.5)  | 25/36<br><br>I: 13/20<br>C: 12/16 | Positive<br>subacromial<br>Impingement<br>Test            | SRQ<br>VAS<br><br>T1/T4/T5                    | „Very positive and interesting to observe that during the follow-up period, assessing pain and function after 6 and 12 months, the high dosage [91] medical exercise therapy group continued to get better, while subjects in the low dosage (LD) exercise group were slowly getting worse.“                                                | <b>Unilateral</b>                                     |
| 144 | Otadi<br>2012<br><br>[144]<br><br>Iran     | I: Laser + Exercise<br><br>C: Ultrasound + Exercise<br><br>F&D: 10 Sessions for 4 wks.                                                                                                                               | A: Not Specified<br><br>D: Not Specified                                                                                                     | 77 [44]<br><br>I: 23<br>C: 21                                       | ∅<br><br>I: 49.48<br>(8.5)<br>C: 48.05<br>(7.9)  | 44<br>(female)                    | Painful Arc<br>Isometric tests<br><br>Impingement<br>Test | Constant<br>VAS<br><br>T1/T3                  | „Methods of treatments were effective, safe and inexpensive therapeutic options for patients with shoulder tendinitis.“                                                                                                                                                                                                                     | <b>Only Female</b>                                    |
| 145 | Ozgen<br>2012<br><br>[145]<br><br>Turkey   | I: Sodium Hyaluronate (SH) Application + TENS +US + Hot Packs<br><br>C: Physical Therapy Modalities (PTM) + TENS + US + Hot Packs<br><br>F&D: 3 Injections in 3 wks., Physiotherapy Modalities not further explained | A: >18<br><br>D:<br>I: 8.75 (4.96)<br>(4-15)<br>C: 9.17 (9.9)<br>(1-14)                                                                      | 40 [24]<br><br>I: 12<br>C: 12                                       | ∅<br><br>I: 58.67<br>(9.8)<br>C: 52.50<br>(8.83) | 18/6<br><br>I: 9/3<br>C: 9/3      | Clinical<br>manifestation<br>MRI                          | AROM<br>VAS<br><br>T1/T3/T6                   | „Physical therapy modalities and SH application supplemented by home exercise programs were similar effects in short- and long term for shoulder tendinitis which causes pain in shoulder and SH application may be a better alternative with regard to effectiveness and side effects for other treatment methods applied intraarticular.“ | <b>Female: +</b><br><br>Data for AROM not Extractable |

| ID  | Authors<br>Year<br>Reference<br>Country        | INTERVENTION/CONTROLS:<br>I: INTERVENTIONS<br>C: CONTROLS<br>1: GROUP 1<br>2: GROUP 2<br>3: GROUP 3<br>4: GROUP 4<br>5: GROUP 5<br><br>F&D: Frequency of Treatment, Duration<br>of Treatment Period                                                                              | Clinical<br>Aspects:<br><br>A: Inclusion<br>Age<br>D: Duration<br>of<br>Symptoms<br>(months if<br>not stated<br>otherwise)<br>Co:<br>Comment | N:<br>Included<br>[Random<br>ized]<br><br>Analysed<br>:<br>I:<br>C: | Mean<br>age (SD,<br>Range)                                                               | Female/<br>Male                               | Inclusion<br>based on Test<br>to confirm<br>Diagnosis                                    | Relevant<br>Outcome/<br>Time of<br>assessment | Conclusion of Study-<br>Authors                                                                                                                                                                                                                                                                  | Remarks          |
|-----|------------------------------------------------|----------------------------------------------------------------------------------------------------------------------------------------------------------------------------------------------------------------------------------------------------------------------------------|----------------------------------------------------------------------------------------------------------------------------------------------|---------------------------------------------------------------------|------------------------------------------------------------------------------------------|-----------------------------------------------|------------------------------------------------------------------------------------------|-----------------------------------------------|--------------------------------------------------------------------------------------------------------------------------------------------------------------------------------------------------------------------------------------------------------------------------------------------------|------------------|
| 146 | Paoloni<br>2005<br><br>[146]<br><br>Australia  | I: Topical Glyceryl Trinitrate Patch (GTN)<br><br>C: Placebo Patch<br><br>F&D: Left in situ for 24 hours and then<br>replaced with a new quarter patch                                                                                                                           | A: >18<br><br>D: <3<br><br>I: 15<br>C: 13<br><br>Co: A few N<br>with bilateral<br>Shoulder pain                                              | 53 [53]<br><br>I: 26<br>C: 27                                       | ∅<br><br>I: 53<br>C: 49                                                                  | 29/24<br><br>I: 13/13<br>C: 16<br>/11         | Hawkins –<br>Kennedy<br><br>Impingement<br>signs<br><br>Empty can<br>position<br><br>MRI | AROM<br><br>T1/T2/T3/T<br>4                   | „The use of continuous<br>topical GTN therapy for<br>supraspinatus<br>tendinopathy resulted in<br>significantly improved<br>shoulder pain with<br>activity, at rest, and at<br>night; significantly<br>increased shoulder<br>range of motion in<br>abduction, flexion and<br>internal rotation.“ | <b>Bilateral</b> |
| 147 | Park<br>2013<br><br>[147]<br><br>Korea         | I: Stabilization Exercise + Heat + US +<br>Laser Interferential<br><br>C: Ordinary Physical Treatment + Heat +<br>US + Laser Interferential<br><br>F&D: 12 Sessions for 4 wks.                                                                                                   | A: Not<br>Specified<br><br>D:<br>I: 6.73 (5.19)<br>C: 6.40 (4.37)                                                                            | 30 [30]<br><br>I: 15<br>C: 15                                       | ∅<br><br>I: 61.53<br>(7.68)<br>C: 60.93<br>(7.04)                                        | 23/7<br><br>I: 12/3<br>C: 11/4                | Diagnosed with<br>shoulder<br>impingement:<br>Not Specified                              | Constant<br>VAS<br><br>T1                     | „In the present study,<br>active flexion, active<br>abduction, passive<br>flexion, and abduction<br>were significantly<br>increased (p<0.05) in the<br>experimental group.“                                                                                                                      | <b>Female: +</b> |
| 148 | Pekyavas<br>2016<br><br>[148]<br><br>Turkey    | 1: Home exercise only<br>2: Exercise and Kinesio Taping<br>3: Exercise, Kinesio Taping and manual<br>therapy<br>4: Exercise, Kinesio Taping, manual therapy<br>and high intensity laser<br><br>F&D: 1-4: Home exercise daily; 15 min.<br>2-4: 3 sessions per week for two weeks. | A: Not<br>Specified<br><br>D: > 3<br>Not specified                                                                                           | 75 [70]<br><br>1: 15<br>2: 20<br>3: 16<br>4: 19                     | ∅<br><br>1:40.6<br>(11.7)<br>2: 49.4<br>(12.6)<br>3: 45.5<br>(15.5)<br>4: 51.1<br>(14.3) | Not<br>specified                              | Diagnosed with<br>shoulder<br>impingement:<br>Not Specified                              | AROM<br>SPADI<br>VAS<br><br>T1                | „Further studies with<br>follow-up periods are<br>required to determine the<br>advantages of these<br>treatments conclusively.“                                                                                                                                                                  |                  |
| 149 | Penning<br>2012<br><br>[149]<br><br>Netherland | 1: Hyaluronic acid injections<br><br>2: Corticosteroid injections<br><br>3: NaCl injections<br><br>F&D: All patients received the first injection.                                                                                                                               | A: >18<br><br>D:<br>35% <26 w<br>65% >26 w                                                                                                   | 222 [159]<br><br>1: 51/44<br>2: 53/45<br>3: 55/48                   | ∅<br><br>1: 53 (12)<br>2: 52 (9)<br>3: 54 (11)                                           | 84/75<br><br>1: 27/24<br>2: 26/27<br>3: 31/24 | Painful Arc                                                                              | SDQ<br>VAS<br><br>T1/T2/T3/T<br>4             | „Clinically, this study<br>does not support the use<br>of hyaluronic acid<br>injections in the<br>treatment of subacromial<br>impingement.<br>Corticosteroid injections<br>seem to be effective in<br>the short term.“                                                                           |                  |

| ID  | Authors<br>Year<br>Reference<br>Country        | INTERVENTION/CONTROLS:<br>I: INTERVENTIONS<br>C: CONTROLS<br>1: GROUP 1<br>2: GROUP 2<br>3: GROUP 3<br>4: GROUP 4<br>5: GROUP 5<br><br>F&D: Frequency of Treatment, Duration of Treatment Period                       | Clinical Aspects:<br><br>A: Inclusion Age<br>D: Duration of Symptoms (months if not stated otherwise)<br>Co:<br>Comment | N:<br>Included [Randomized]<br><br>Analysed<br>:<br>I:<br>C: | Mean age (SD, Range)                                           | Female/<br>Male                                 | Inclusion based on Test to confirm Diagnosis                                | Relevant Outcome/<br>Time of assessment                      | Conclusion of Study-<br>Authors                                                                                                                                                                                              | Remarks                          |
|-----|------------------------------------------------|------------------------------------------------------------------------------------------------------------------------------------------------------------------------------------------------------------------------|-------------------------------------------------------------------------------------------------------------------------|--------------------------------------------------------------|----------------------------------------------------------------|-------------------------------------------------|-----------------------------------------------------------------------------|--------------------------------------------------------------|------------------------------------------------------------------------------------------------------------------------------------------------------------------------------------------------------------------------------|----------------------------------|
| 150 | Penning<br>2014<br><br>[150]<br><br>Netherland | 1: Hyaluronic acid injections<br><br>2: Corticosteroid injections<br><br>3: NaCl injections<br><br>F&D: All patients received the first injection.                                                                     | A: >18<br><br>D:<br>35% <26 w<br>65% >26 w                                                                              | 222 [159]<br><br>1: 51/44<br>2: 53/45<br>3: 55/48            | Ø<br><br>1: 53 (12)<br>2: 52 (9)<br>3: 54 (11)                 | 84/75<br><br>1: 27/24<br>2: 26/27<br>3: 31/24   | Painful Arc                                                                 | SDQ<br>VAS<br><br>T1/T2/T3/T4                                | „The triamcinolone acetonide group showed a faster reduction in pain after injection compared to the hyaluronic acid and NaCl group..... it is necessary to repeat triamcinolone acetonide injections more than two times..“ | Same study<br>Data not extracted |
| 151 | Perez-Merino<br>2015<br><br>[151]<br><br>Spain | 1: Ultrasound<br><br>2: Phonophoresis with Dexketoprofen<br><br>3: Iontophoresis with Dexketoprofen<br><br>F&D: All 3 groups received standardized exercise therapy and cryotherapy; 5 sessions/week; 20 sessions.     | A: Not Specified<br><br>D:<br>1: 7.4 (6.1)<br>2: 8.0 (8.8)<br>3: 6.7 (8.0)                                              | 72 [99]<br><br>1: 32<br>2: 33<br>3: 34                       | Ø<br><br>1: 54.2 (10,5)<br>2: 52,9 (9,6)<br>3: 56,1 (8,1)      | 57/42<br><br>1: 18/14<br>2: 21/12<br>3: 18/16   | US                                                                          | VAS<br>Constant<br>DASH<br><br>T1/T2                         | “Results support the use of ultrasound, phonophoresis with dexketoprofen and iontophoresis with dexketoprofen for the treatment of SIS.”                                                                                     |                                  |
| 152 | Peters<br>1997<br><br>[152]<br><br>Germany     | I: Surgery<br><br>C: Conservative Therapy                                                                                                                                                                              |                                                                                                                         | 72 [72]<br><br>I: 32<br>C: 40                                | Ø<br><br>1:56 (37-78)<br>2: 59 (37-82)                         | 26/46<br><br>I: 14/18<br>C: 12/28               | Painful Arc<br>Injection Test<br>Resistive ABD,<br>Flex, ER<br><br>Stage II | Subjective<br>shoulder<br>rating<br>scale<br><br>T: >4 years | “Surgery and conservative interventions showed similar results over 4 years.”                                                                                                                                                | No data<br>Extractable           |
| 153 | Petri<br>2004<br><br>[153]<br><br>USA          | 1: Celecoxib 200 mg Bid<br><br>2: Naproxen 500 mg Bid<br><br>3: Placebo<br><br>F&D:                                                                                                                                    | A: >18<br><br>D: Acute phase less than 7 days                                                                           | 306 [306]<br><br>1: 98<br>2: 100<br>3: 108                   | Ø<br><br>1: 47.9<br>2: 48<br>3: 50.5                           | 109/197<br><br>1: 35/63<br>2: 38/62<br>3: 36/72 | Painful Arc<br><br>Painful movement                                         | AROM<br>VAS<br><br>T1                                        | „Celecoxib 200 mg bid provided analgesic efficacy in patients with acute shoulder tendinitis and/or bursitis without compromising tolerability.“                                                                             | Male: +                          |
| 154 | Plafki<br>2000<br><br>[154]<br><br>Germany     | 1: 10 ml of pure 0.5 % Bupivacaine<br><br>2: 10mg of Triamcinolone acetonide with 10 ml of pure 0.5 % Bupivacaine<br><br>3: 4mg of Dexamethasone with 10 ml of pure 0.5 % Bupivacaine<br><br>F&D: One Single Injection | A: Not Specified<br><br>D: >3<br>1: 17.3<br>2: 15.1<br>3: 18.2                                                          | 50 [50]<br><br>1: 10<br>2: 20<br>3: 20                       | Ø<br><br>1: 43.4 (29-61)<br>2: 42.3 (29-63)<br>3: 44.8 (27-60) | 16/34<br><br>1: 4/6<br>2: 6/14<br>3: 6/14       | Hawkins–<br>Kennedy<br>Neer                                                 |                                                              | „Supports the efficacy and importance of sub acromial steroid injections for patients with chronic refractory impingement syndrome. Short-term results indicate that surgery may be prevented in at least half of them.“     | No data<br>Extractable           |

| ID  | Authors<br>Year<br>Reference<br>Country    | INTERVENTION/CONTROLS:<br>I: INTERVENTIONS<br>C: CONTROLS<br>1: GROUP 1<br>2: GROUP 2<br>3: GROUP 3<br>4: GROUP 4<br>5: GROUP 5<br><br>F&D: Frequency of Treatment, Duration of Treatment Period                                  | Clinical Aspects:<br><br>A: Inclusion Age<br>D: Duration of Symptoms (months if not stated otherwise)<br>Co:<br>Comment | N:<br>Included [Randomized]<br><br>Analysed :<br>I:<br>C: | Mean age (SD, Range)                      | Female/<br>Male                   | Inclusion based on Test to confirm Diagnosis          | Relevant Outcome/<br>Time of assessment | Conclusion of Study-<br>Authors                                                                                                                                                                                                                         | Remarks             |
|-----|--------------------------------------------|-----------------------------------------------------------------------------------------------------------------------------------------------------------------------------------------------------------------------------------|-------------------------------------------------------------------------------------------------------------------------|-----------------------------------------------------------|-------------------------------------------|-----------------------------------|-------------------------------------------------------|-----------------------------------------|---------------------------------------------------------------------------------------------------------------------------------------------------------------------------------------------------------------------------------------------------------|---------------------|
| 155 | Polimeni<br>2003<br><br>[155]<br><br>Italy | 1: Shoulder Rehabilitation<br><br>2: Shoulder Rehabilitation + Radar<br><br>3: Shoulder Rehabilitation + Diadynamic Current<br><br>4: Shoulder Rehabilitation + US<br><br>F&D: 10min passive, 20min assisted exercise for 10 days | A: Not Specified<br><br>D: <3                                                                                           | 50[50]<br><br>Not specified                               | Ø 56 (28-85)                              | 36/14                             | Impingement Test<br>Jobe<br>Yergason                  | Constant<br><br>T1/T2                   | „All patients experienced improvement with treatment, but the association of physical therapy and functional rehab did not seem to lead to added benefit for the patient.“                                                                              | No data Extractable |
| 156 | Pons<br>2001<br><br>[156]<br><br>Spain     | I: Nitroglycerin Patch of 5 mg<br><br>C: Steroid Injection and Lidocaine<br><br>F&D: Patch for 3 days                                                                                                                             | A: Not Specified<br><br>D: <6 wks.<br>Not specified                                                                     | 48 [48]<br><br>I: 24<br>C: 24                             | Ø 61                                      | 33/15                             | Gerber<br>Jobe<br><br>Pate<br><br>Painful Arc         | VAS<br><br>T2                           | „Treatment with NTG is not a clear alternative to infiltration of corticosteroids in patients with RCT, because of its lack of effectiveness and because of the greater number of patients who had adverse events that lead them to abandon treatment.“ | No data Extractable |
| 157 | Rabini<br>2012<br><br>[157]<br><br>Italy   | I: Local Microwave Diathermy<br><br>C: Injection of 40 mg Methylprednisolone acetate<br><br>F&D:<br>I: 12 Sessions for 4 wks.<br>C: Injection every other wk., 3 Times                                                            | A: >18<br><br>D: >3<br><br>I: 13.1 (9.1)<br>C: 15.5 (20.4)                                                              | 204 [92]<br><br>I: 46<br>C: 46                            | Ø<br><br>I: 56.6 (11.6)<br>C: 59.2 (7.1)  | 61/31<br><br>I: 31/15<br>C: 30/16 | Hawkins-Kennedy<br><br>Resisted break test<br><br>MRI | Constant<br>DASH<br>VAS<br><br>T1/T3/T4 | „Local hyperthermia and subacromial corticosteroid injections improved shoulder function and pain relative to baseline in patients affected by rotator cuff tendinopathy, with no differences between treatments.“                                      |                     |
| 158 | Radnovich<br>2014<br><br>[158]<br><br>USA  | I: Heated Lidocaine + Tetracaine Patch (HLT)<br><br>C: Injection of Triamcinolone<br><br>F&D:<br>I: Twice daily for 14 days<br>C: One Single Injection                                                                            | A: >18<br><br>D: >2 wks.                                                                                                | 65 [60]<br><br>I: 29<br>C: 31                             | Ø<br><br>I: 55.5 (12.1)<br>C: 51.4 (10.2) | 21/39<br><br>I: 12/17<br>C: 9/22  | Hawkins-Kennedy<br>Neer                               | AROM<br>VAS<br><br>T1/T2                | „Short-term, non-invasive treatment with the HLT patch has similar efficacy to sub acromial corticosteroid injections for the treatment of pain associated with SIS.“                                                                                   | Male: +             |

| ID  | Authors<br>Year<br>Reference<br>Country     | INTERVENTION/CONTROLS:<br>I: INTERVENTIONS<br>C: CONTROLS<br>1: GROUP 1<br>2: GROUP 2<br>3: GROUP 3<br>4: GROUP 4<br>5: GROUP 5<br><br>F&D: Frequency of Treatment, Duration<br>of Treatment Period | Clinical<br>Aspects:<br><br>A: Inclusion<br>Age<br>D: Duration<br>of<br>Symptoms<br>(months if<br>not stated<br>otherwise)<br>Co:<br>Comment | N:<br>Included<br>[Random<br>ized]<br><br>Analysed<br>:<br>I:<br>C: | Mean<br>age (SD,<br>Range)                       | Female/<br>Male                   | Inclusion<br>based on Test<br>to confirm<br>Diagnosis | Relevant<br>Outcome/<br>Time of<br>assessment | Conclusion of Study-<br>Authors                                                                                                                                                                                                                                                                                                                    | Remarks                          |
|-----|---------------------------------------------|-----------------------------------------------------------------------------------------------------------------------------------------------------------------------------------------------------|----------------------------------------------------------------------------------------------------------------------------------------------|---------------------------------------------------------------------|--------------------------------------------------|-----------------------------------|-------------------------------------------------------|-----------------------------------------------|----------------------------------------------------------------------------------------------------------------------------------------------------------------------------------------------------------------------------------------------------------------------------------------------------------------------------------------------------|----------------------------------|
| 159 | Rahme<br>1998<br><br>[159]<br><br>Sweden    | I: Surgery<br><br>C: Physiotherapy only<br><br>F&D: C: Advice and Exercise                                                                                                                          | A: Not<br>Specified<br><br>D: >1yr<br><br>Co: 10<br>resulted on<br>initial trauma                                                            | 42 [42]<br><br>I: 21<br>C: 21                                       | Ø 42 (28-<br>63)                                 | 23/19                             | Impingement<br>Sign<br>Impingement<br>Test            | AROM<br>VAS<br><br>T3/T4/T5                   | "Data suggest that<br>surgical treatment is<br>more effective than a<br>standardized<br>physiotherapy regime."                                                                                                                                                                                                                                     |                                  |
| 160 | Razavi<br>2004<br><br>[160]<br><br>Sweden   | I: Exercise and acupuncture<br><br>C: Exercise and TENS<br><br>F&D: 10 Sessions, 1-2 times per week                                                                                                 | A: Not<br>Specified<br><br>D: Not<br>Specified<br>I: 12 (0.5-<br>168)<br>C: 12 (0.5<br>240)                                                  | 40 [37]<br><br>I: 16<br>C: 17                                       | Ø<br><br>I: 49.5<br>(27-77)<br>C: 53 (28-<br>61) | 12/21<br><br>I: 4/12<br>C: 8/9    | Resistance<br>Test                                    | AROM<br><br>T1/T4                             | „Acupuncture has no or<br>little effect on rotator cuff<br>tendinitis in comparison<br>to placebo TENS.“                                                                                                                                                                                                                                           |                                  |
| 161 | Rha<br>2013<br><br>[161]<br><br>South Korea | I: Platelet-Rich Plasma Injection<br><br>C: Dry Needling<br><br>F&D: I: 2 Injections                                                                                                                | A: Not<br>Specified<br><br>D: >6<br><br>I: 9.6 (3.6)<br>C: 9.2 (3.2)                                                                         | 70 [39]<br><br>I: 20<br>C: 19                                       | Ø<br><br>I: 52.2<br>(9.5)<br>C: 53.9<br>(11.6)   | 22/17<br><br>I: 11/9<br>C: 11/8   | Painful Arc<br>Impingement<br>sign<br><br>MRI         | SPADI<br>AROM<br><br>T1/T3/T4                 | „Autologous platelet-rich<br>plasma injections lead to<br>a progressive reduction<br>in pain and disability<br>when compared to dry<br>needling, although dry<br>needling itself also<br>shows un-expectedly<br>good results in some<br>patients with rotator cuff<br>disease. This benefit is<br>still present at six months<br>after treatment.“ |                                  |
| 162 | Rhon<br>2014<br><br>[162]<br><br>USA        | I: 40 mg Triamcinolone<br><br>C: Manual Physical Therapy<br><br>F&D: Up to 3 Injections versus 6 Sessions                                                                                           | A: 18-65<br><br>D:<br>I: 6.5 (13.9)<br>C: 4.9 (4.4)<br><br>Co: Unilateral                                                                    | 242 [104]<br><br>I: 52<br>C: 52<br><br>1yr:<br>I: 52<br>C: 46       | Ø<br><br>I: 42<br>C: 40                          | 31/67<br><br>I: 14/38<br>C: 17/29 | Not<br>specified                                      | NPRS<br>SPADI<br>GRC<br><br>T5                | „Manual physical therapy<br>and CSI produced similar<br>outcomes in the<br>treatment of patients with<br>SIS. However, patients<br>receiving CSI had more<br>shoulder-related health<br>care use through 1 year.“                                                                                                                                  | Male: +<br><br><b>Unilateral</b> |



| ID  | Authors<br>Year<br>Reference<br>Country       | INTERVENTION/CONTROLS:<br>I: INTERVENTIONS<br>C: CONTROLS<br>1: GROUP 1<br>2: GROUP 2<br>3: GROUP 3<br>4: GROUP 4<br>5: GROUP 5<br><br>F&D: Frequency of Treatment, Duration of Treatment Period    | Clinical Aspects:<br><br>A: Inclusion Age<br>D: Duration of Symptoms (months if not stated otherwise)<br>Co:<br>Comment | N:<br>Included [Randomized]<br><br>Analysed<br>:<br>I:<br>C:                    | Mean age (SD, Range)                                       | Female/<br>Male                            | Inclusion based on Test to confirm Diagnosis                                           | Relevant Outcome/<br>Time of assessment           | Conclusion of Study-<br>Authors                                                                                                                                                                                                                                           | Remarks                                  |
|-----|-----------------------------------------------|-----------------------------------------------------------------------------------------------------------------------------------------------------------------------------------------------------|-------------------------------------------------------------------------------------------------------------------------|---------------------------------------------------------------------------------|------------------------------------------------------------|--------------------------------------------|----------------------------------------------------------------------------------------|---------------------------------------------------|---------------------------------------------------------------------------------------------------------------------------------------------------------------------------------------------------------------------------------------------------------------------------|------------------------------------------|
| 163 | Saeed<br>2013<br><br>[163]<br><br>Ireland     | I: Musculoskeletal Ultrasonography (MSUS) – Methylprednisolone acetate<br><br>C: Palpation Guided - Methylprednisolone acetate<br><br>F&D: One single Injection                                     | A: 21-85<br><br>D: >3 wks.<br>1. 19.64 (1.84)<br>2. 20.02 (1.52)                                                        | 100 [100]<br><br>90 shoulders<br>I: 50<br>59 shoulders<br>C: 50<br>66 shoulders | Ø 57.7 (21-85)                                             | 65/35                                      | Shoulder functions test for impingement                                                | AROM<br>SFT<br>VAS<br><br>T2/T3                   | „We conclude MSUS-guided shoulder injection is superior to Palpation-guided injection in managing shoulder pain.“                                                                                                                                                         | <b>Female: +</b><br><br><b>Bilateral</b> |
| 164 | Sahin<br>2016<br><br>[164]<br><br>Turkey      | 1: NSAID<br><br>2: NSAID and Kinesio Taping<br><br>3: NSAID, Kinesio Taping and one steroid injection<br><br>F&D:<br>1-3: Home exercise daily for 4 wks.<br>2-4: Kinesio Tape: Renewed after 3 days | A: Not Specified<br><br>D: 1- 6 mos. In weeks<br>1: 7.7 (14.8)<br>2: 7.2 (9.7)<br>3: 8.2 (8.9)                          | 123 [102]<br><br>1: 33<br>2: 33<br>3: 34                                        | Ø<br><br>1: 54:0 (9.8)<br>2: 51.5 (11.0)<br>3: 53.1 (14.4) | 78/21<br><br>1: 25/8<br>2: 26/7<br>3: 27/6 | Hawkins–Kennedy<br>Neer<br>Jobe                                                        | SDQ<br>UCLA<br>VAS<br><br>T1                      | “Addition of KT or subacromial corticosteroid injection to NSAID treatment seems to have better/similar effectiveness in patients with SIS. Therefore, kinesiotaping might serve as an alternative treatment in case (injection of) corticosteroids are contraindicated.” |                                          |
| 165 | San Segundo<br>2007<br><br>[165]<br><br>Spain | I: Pulsed Ultrasound + Exercise<br><br>C: Sham Ultrasound + Exercise<br><br>F&D: 15 Sessions in 3 wks.                                                                                              | A: 18–70<br><br>D: >3<br>I: 10.2 (11.4)<br>C: 12.6 (11.1)                                                               | 34 [34]<br><br>I: 17<br>C: 17                                                   | Ø<br><br>I: 52.6 (10.9)<br>C: 56.9 (9.4)                   | 29/5<br><br>I: 14/3<br>C: 15/2             | Tests for sub acromial syndrome                                                        | Constant<br>VAS<br><br>T1                         | „US therapy has not been demonstrated to be more effective than sham for the treatment of shoulder pain secondary to rotator cuff disease.“                                                                                                                               | <b>Female: +</b>                         |
| 166 | Santamato<br>2009<br><br>[166]<br><br>Italy   | I: High Intensity Laser Therapy (HILT)<br><br>C: Ultrasound Therapy<br><br>F&D: 10 Sessions in 2 wks.                                                                                               | A: Not Specified<br><br>D: >1<br>I: 8.7 (8.8)<br>C: 8.1 (10.8)                                                          | 77 [70]<br><br>I: 35<br>C: 35                                                   | Ø 54.1 (9)<br><br>I: 54.2 (8.2)<br>C: 54.0 (9.8)           | 42/28<br><br>I: 20/15<br>C: 22/13          | Hawkins–Kennedy<br>Neer<br>(Stage I/II)<br><br>Painful Arc<br><br>Injection Test<br>US | Constant<br>Simple shoulder test<br>VAS<br><br>T1 | “HILT was shown to have greater benefit for SAIS than US therapy in reducing pain and improving the articular movement, functionality, and muscle strength of the affected shoulder.”                                                                                     |                                          |

| ID  | Authors<br>Year<br>Reference<br>Country            | INTERVENTION/CONTROLS:<br>I: INTERVENTIONS<br>C: CONTROLS<br>1: GROUP 1<br>2: GROUP 2<br>3: GROUP 3<br>4: GROUP 4<br>5: GROUP 5<br><br>F&D: Frequency of Treatment, Duration of Treatment Period | Clinical Aspects:<br><br>A: Inclusion Age<br>D: Duration of Symptoms (months if not stated otherwise)<br>Co:<br>Comment | N: Included [Randomized]<br><br>Analysed :<br>I:<br>C: | Mean age (SD, Range)                                                                | Female/ Male                             | Inclusion based on Test to confirm Diagnosis                                                     | Relevant Outcome/ Time of assessment | Conclusion of Study- Authors                                                                                                                                                                                                                            | Remarks                      |
|-----|----------------------------------------------------|--------------------------------------------------------------------------------------------------------------------------------------------------------------------------------------------------|-------------------------------------------------------------------------------------------------------------------------|--------------------------------------------------------|-------------------------------------------------------------------------------------|------------------------------------------|--------------------------------------------------------------------------------------------------|--------------------------------------|---------------------------------------------------------------------------------------------------------------------------------------------------------------------------------------------------------------------------------------------------------|------------------------------|
| 167 | Santamato<br>2016<br><br>[167]<br><br>Italy        | I: Extracorporeal shockwave therapy (ESWT) and isokinetic exercise<br><br>C: Extracorporeal shockwave therapy (ESWT) alone<br><br>F&D: 3 sessions over 10 days                                   | A: >18<br><br>D: >1<br>I: 7.5 (4.2)<br>C: 7.6 (3.8)                                                                     | 77 [70]<br><br>I: 15<br>C: 15                          | Ø 54.1 (9)<br><br>I: 39.4 (3.9)<br>C: 41.1 (6.0)                                    | 16/14<br><br>I: 9/6<br>C: 7/8            | Hawkins– Kennedy Neer (Stage I/II)<br><br>Painful Arc<br><br>Injection Test US/MRI               | Constant VAS<br><br>T1 /T3           | “In subjects with SAIS, combined administration of focused ESWT and IE for the rotator cuff resulted in greater reduction of pain, as well as superior functional recovery and muscle endurance in the short to medium term, compared with ESWT alone.” |                              |
| 168 | Saunders<br>1995<br><br>[168]<br><br>Great Britain | I: Low Level Laser<br><br>C: Sham Laser<br><br>F&D: 9 Sessions, Advice in 3 wks.                                                                                                                 | A: 35-65<br><br>D: =1<br>I: 3.86 (2.4)<br>C: 3.32 (1.9)                                                                 | 24 [24]<br><br>I: 12<br>C: 12                          | Ø<br><br>I: 49.8 (8.12) (37-63)<br>C: 50.7 (8.31) (39-64)                           | 12/12                                    | Referred from GP's with supraspinatus tendinitis<br><br>Impingement<br>Empty can test<br>Hawkins | AROM VAS<br><br>T1                   | „Laser therapy, advice and education improved certain symptoms of supraspinatus tendinitis.“                                                                                                                                                            | For AROM no data Extractable |
| 169 | Saunders<br>2003<br><br>[169]<br><br>Great Britain | 1: Low Power Laser Therapy + Advice<br><br>2: Ultrasound + Advice<br><br>3: Advice<br><br>F&D: 9 Sessions in 3 wks.                                                                              | A: 35-80<br><br>D: >1<br>1: 6.8 (6.4) (2-24)<br>2: 6.8 (5.6) (2-12)<br>3: 7.4 (3.5) (2-12)                              | 36 [36]<br><br>1: 12<br>2: 12<br>3: 12                 | Ø<br><br>1: 53.5 (12.2) (37-75)<br>2: 56.3 (13.8) (37-77)<br>3: 59.6 (10.9) (39-76) | 17 /19<br><br>1: 6/6<br>2: 7/5<br>3: 4/8 | Painful shoulder<br><br>Empty can test                                                           | Oswestry VAS<br><br>T1               | „The dose of laser therapy used in the study, advice and education improve the symptoms of supraspinatus tendinosis. US also improved the symptoms, but was not significantly different from the control group that received advice only.“              | No data Extractable          |
| 170 | Schmitt<br>2001<br><br>[170]<br><br>Germany        | I: Low Energy Extracorporeal Shock Wave (ESWT)<br><br>C: Sham Low Energy Extracorporeal Shock Wave<br><br>F&D: 3 Sessions in 3 wks.                                                              | A: >18<br><br>D: >6<br><br>Co: 10 Sessions physiotherapy and 2 sub-acromial infiltrations                               | 40 [40]<br><br>I: 20<br>C: 20                          | Ø 52 (29-66)                                                                        | 20/20                                    | MRI                                                                                              | Constant VAS<br><br>T2/T3            | „The use of low-energy ESWT in the treatment of tendinitis of the supraspinatus is time consuming, expensive and probably ineffective compared with sub acromial injections.“                                                                           |                              |

| ID  | Authors<br>Year<br>Reference<br>Country     | INTERVENTION/CONTROLS:<br>I: INTERVENTIONS<br>C: CONTROLS<br>1: GROUP 1<br>2: GROUP 2<br>3: GROUP 3<br>4: GROUP 4<br>5: GROUP 5<br><br>F&D: Frequency of Treatment, Duration<br>of Treatment Period | Clinical<br>Aspects:<br><br>A: Inclusion<br>Age<br>D: Duration<br>of<br>Symptoms<br>(months if<br>not stated<br>otherwise)<br>Co:<br>Comment | N:<br>Included<br>[Random<br>ized]<br><br>Analysed<br>:<br>I:<br>C: | Mean<br>age (SD,<br>Range)                    | Female/<br>Male               | Inclusion<br>based on Test<br>to confirm<br>Diagnosis                | Relevant<br>Outcome/<br>Time of<br>assessment | Conclusion of Study-<br>Authors                                                                                                                                                                                                                                      | Remarks                                                                                                                                                     |
|-----|---------------------------------------------|-----------------------------------------------------------------------------------------------------------------------------------------------------------------------------------------------------|----------------------------------------------------------------------------------------------------------------------------------------------|---------------------------------------------------------------------|-----------------------------------------------|-------------------------------|----------------------------------------------------------------------|-----------------------------------------------|----------------------------------------------------------------------------------------------------------------------------------------------------------------------------------------------------------------------------------------------------------------------|-------------------------------------------------------------------------------------------------------------------------------------------------------------|
| 171 | Schmitt<br>2002<br><br>[171]<br><br>Germany | I: Extracorporeal Shock Wave Therapy<br>(ESWT)<br><br>C: Sham Extracorporeal Shock Wave<br>Therapy<br><br>F&D: 3 Sessions in 3 wks.                                                                 | A: Not<br>Specified<br><br>D: >6<br><br>Co: 10<br>Sessions<br>Physiotherap<br>y and 2 sub-<br>acromial<br>Infiltrations                      | 40 [39]<br><br>I: 19<br>C: 20                                       | Ø<br><br>I: 53.3<br>(9.4)<br>C: 54.2<br>(7.8) | 11/10<br><br>I: 8/4<br>C: 3/6 | Pain with ABD<br>and external<br>rotation                            | VAS<br><br>T5                                 | There was no effect one<br>year after the application<br>of ESWT on pain or<br>function in patients<br>having a chronic<br>condition of tendinitis of<br>the supraspinatus."                                                                                         | Blinding was<br>disclosed<br>for patients<br>not<br>improved.<br>Therefore<br>we take<br>values up to<br>12 week.<br>Same<br>results in<br>Schmitt<br>2001. |
| 172 | Schofer<br>2009<br><br>[172]<br><br>Germany | I: High Energy Extracorporeal Shock Wave<br>(ESWT)<br><br>C: Low Energy Extracorporeal Shock Wave<br><br>F&D: 3 Sessions in 3 wks.                                                                  | A: >18<br><br>D: >6<br><br>Co: 10<br>Sessions<br>physiotherapy<br>and 2 sub-<br>acromial<br>infiltrations                                    | 40 [40]<br><br>I: 20/19<br>C: 20/18                                 | Ø 53<br>(28-71)                               | 21/19                         | MRI                                                                  | Constant<br>VAS<br><br>T3/T5                  | „No statistically<br>significant differences<br>were found between the<br>outcome of high-energy<br>and low-energy ESWT<br>treatment of rotator cuff<br>tendinopathy.“                                                                                               |                                                                                                                                                             |
| 173 | Senbursa<br>2007<br><br>[173]<br><br>Turkey | I: Manual Therapy + Conservative Therapy<br><br>C: Conservative + Self Therapy<br><br>F&D: 12 Sessions in 4 wks.                                                                                    | A: 30-55<br><br>D: Not<br>Specified                                                                                                          | 30 [30]<br><br>I: 15<br>C: 15                                       | Ø<br><br>I: 48.1<br>(7.5)<br>C: 49.5<br>(7.9) | Not<br>specified              | Painful range of<br>movement<br><br>Impingement<br>Tests<br><br>Neer | VAS<br><br>T1                                 | “Manual therapy applied<br>by experienced physical<br>therapists combined with<br>supervised exercise in a<br>brief clinical trial might be<br>better and earlier than<br>exercise alone for<br>increasing strength,<br>decreasing pain, and<br>improving function.” |                                                                                                                                                             |

| ID  | Authors<br>Year<br>Reference<br>Country     | INTERVENTION/CONTROLS:<br>I: INTERVENTIONS<br>C: CONTROLS<br>1: GROUP 1<br>2: GROUP 2<br>3: GROUP 3<br>4: GROUP 4<br>5: GROUP 5<br><br>F&D: Frequency of Treatment, Duration<br>of Treatment Period | Clinical<br>Aspects:<br><br>A: Inclusion<br>Age<br>D: Duration<br>of<br>Symptoms<br>(months if<br>not stated<br>otherwise)<br>Co:<br>Comment | N:<br>Included<br>[Random<br>ized]<br><br>Analysed<br>:<br>I:<br>C: | Mean<br>age (SD,<br>Range)                                          | Female/<br>Male                   | Inclusion<br>based on Test<br>to confirm<br>Diagnosis                               | Relevant<br>Outcome/<br>Time of<br>assessment        | Conclusion of Study-<br>Authors                                                                                                                                                                                                                          | Remarks                |
|-----|---------------------------------------------|-----------------------------------------------------------------------------------------------------------------------------------------------------------------------------------------------------|----------------------------------------------------------------------------------------------------------------------------------------------|---------------------------------------------------------------------|---------------------------------------------------------------------|-----------------------------------|-------------------------------------------------------------------------------------|------------------------------------------------------|----------------------------------------------------------------------------------------------------------------------------------------------------------------------------------------------------------------------------------------------------------|------------------------|
| 174 | Senbursa<br>2011<br><br>[174]<br><br>Turkey | 1: Supervised Exercise<br><br>2: Manual Treatment<br><br>3: Home Based Exercise<br><br>F&D: 3 times a week for 12 wks.<br>No sporting activities for 12 wks.                                        | A: 33-55<br><br>D: Not<br>Specified                                                                                                          | 77 [77]<br><br>1: 25<br>2: 30<br>3: 22                              | ∅<br><br>1: 48.2<br>(7.9)<br>2.: 50.5<br>(10.6)<br>3: 48.0<br>(9.0) | Not<br>specified                  | Hawkins–<br>Kennedy<br>Neer<br><br>MRI<br>(stage I/II)                              | VAS<br><br>T1                                        | “Showed the effectiveness of manual therapy in supraspinatus tendinopathy. The use of manipulative therapy may help relieve the pain and increase the shoulder range of motion. It may also shorten the treatment period and reduce the treatment cost.” | No data<br>Extractable |
| 175 | Shakeri<br>2013<br><br>[175]<br><br>Iran    | I: Kinesiological Taping<br><br>C: Standardized Placebo Taping<br><br>F&D: For three days and then taped with<br>the same method used before.                                                       | A: Not<br>Specified<br><br>D: >1 wk. up<br>6 mos.<br><br>I: 7.63 (7.43)<br>C: 9.33<br>(10.48)                                                | 30 [30]<br><br>I: 15<br>C: 15                                       | ∅<br><br>I: 46.53<br>(13.31)<br>C: 46.6<br>(14.24)                  | 15/15<br><br>I: 8/7<br>C: 7 /8    | Painful Arc<br>Pain at resisted<br>movement<br><br>Hawkins<br>Jobe<br>Neer<br>Yocum | AROM<br>VAS<br><br>T1                                | Kinesio Taping (KT) produced an immediate improvement in pain intensity during movement and in the measure of nocturnal pain. However, no longer term effects of KT existed after one week.”                                                             |                        |
| 176 | Shibata<br>2001<br><br>[176]<br><br>Japan   | I: Sodium Hyaluronate<br><br>C: Steroid Injection<br><br>F&D: Once a week for 5 wks.                                                                                                                | A: Not<br>Specified<br><br>D:<br>I: 5.8 (5.4)<br>C: 4.7 (5.7)<br><br>Co: Full<br>thickness<br>tears                                          | 78 [78]<br><br>I: 38<br>C: 40                                       | ∅<br><br>I: 59.5<br>(9.1)<br>C: 62.4<br>(8.6)                       | 23/55<br><br>I: 11/27<br>C: 12/28 | MRI                                                                                 | AROM<br>UCLA<br><br>T2/T4                            | “We noted improvement in symptoms and disability after injecting sodium hyaluronate (SH) into the shoulder joints with a rotator cuff tear.”                                                                                                             | Male: +                |
| 177 | Simsek<br>2013<br><br>[177]<br><br>Turkey   | I: Kinesio Tape<br><br>C: Placebo Tape<br><br>F&D: Written in Turkish.                                                                                                                              | A: 18–70<br><br>D: Not<br>Specified                                                                                                          | [38]<br><br>I: 19<br>C: 19                                          | ∅ 51 (18-<br>69)                                                    | 25/13<br><br>I: 11/ 8<br>C: 14/5  | Hawkins–<br>Kennedy<br>Neer                                                         | Anketi-<br>DASH<br>AROM<br>Constant<br>VAS<br><br>T1 | <b>No English abstract available.</b>                                                                                                                                                                                                                    |                        |

| ID  | Authors<br>Year<br>Reference<br>Country          | INTERVENTION/CONTROLS:<br>I: INTERVENTIONS<br>C: CONTROLS<br>1: GROUP 1<br>2: GROUP 2<br>3: GROUP 3<br>4: GROUP 4<br>5: GROUP 5<br><br>F&D: Frequency of Treatment, Duration of Treatment Period | Clinical Aspects:<br><br>A: Inclusion Age<br>D: Duration of Symptoms (months if not stated otherwise)<br>Co:<br>Comment | N:<br>Included [Randomized]<br><br>Analysed :<br>I:<br>C: | Mean age (SD, Range)                        | Female/<br>Male                   | Inclusion based on Test to confirm Diagnosis                     | Relevant Outcome/<br>Time of assessment          | Conclusion of Study-<br>Authors                                                                                                                                                                                         | Remarks                                 |
|-----|--------------------------------------------------|--------------------------------------------------------------------------------------------------------------------------------------------------------------------------------------------------|-------------------------------------------------------------------------------------------------------------------------|-----------------------------------------------------------|---------------------------------------------|-----------------------------------|------------------------------------------------------------------|--------------------------------------------------|-------------------------------------------------------------------------------------------------------------------------------------------------------------------------------------------------------------------------|-----------------------------------------|
| 178 | Speed<br>2002<br><br>[178]<br><br>Great Britain  | I: Extracorporeal Shock Wave Therapy (ESWT)<br><br>C: Placebo Shock Wave Therapy<br><br>F&D: 3 Sessions at monthly intervals                                                                     | A: >18<br><br>D: >3<br>I: 23 (31) (3-169)<br>C: 23.3 (21) (3-104)<br><br>Co: Unilateral                                 | 74 [74]<br><br>I: 34<br>C: 40                             | ∅<br><br>I: 50.7 (26-72)<br>C: 54.2 (25-75) | 43/31<br><br>I: 21/13<br>C: 22/18 | Impingement Sign<br><br>Painful Arc                              | SPADI<br>VAS<br><br>T1/T3                        | "We conclude that there is a significant and sustained placebo effect after moderate doses of ESWT in patients with tendonitis of the rotator cuff, but there is no evidence of added benefit when compared with sham." | <b>Unilateral</b>                       |
| 179 | Streitberger<br>2000<br><br>[179]<br><br>Germany | I: Acupuncture<br><br>C: Sham, without Penetration of the Skin<br><br>F&D: 2 Sessions (20min) for 4 wks.                                                                                         | A: >18<br><br>D: >1<br><br>Co: Athletes                                                                                 | 52 [52]<br><br>I: 25 (-3)<br>C: 27 (-4)                   | ∅<br><br>Not Specified                      | Not Specified                     | Not Specified                                                    | Constant<br><br>T2                               | "Acupuncture in the treatment of rotator cuff tendinitis was more effective than placebo needling without penetration of the skin."                                                                                     | Same data as in Kleinhenz et al. (1999) |
| 180 | Struyf<br>2013<br><br>[180]<br><br>Belgium       | I: Scapular Dynamic Stability + Positioning<br><br>C: Ultrasound + Friction + Eccentric Rotator Cuff Training<br><br>F&D: 9 Sessions, 1-3 times per week, for 3-8 wks.                           | A: >18<br><br>D: >1                                                                                                     | 27 [22]<br><br>I: 10<br>2: 12                             | ∅<br><br>I: 45.4 (15.1)<br>C: 46.2 (13.5)   | 10/12<br><br>I: 5/5<br>C: 5/7     | At least 2 of 3 tests:<br>Hawkins–Kennedy<br>Jobe<br>Neer        | SDQ<br>VNRS<br><br>T3                            | "A scapular-focused treatment approach showed promising clinical results in a group of patients with SIS."                                                                                                              |                                         |
| 181 | Subasi<br>2012<br><br>[181]<br><br>Turkey        | I: Water Based Exercise + Physiotherapy (Us, Heat, Tens)<br><br>C: Land Based Exercise + Physiotherapy (Us, Heat, Tens)<br><br>F&D: 10 days ROM-training and 10 days strength-training           | A: Not Specified<br><br>D:<br>I: 10 (13.2)<br>C: 8.9 (7.5)<br><br>Co: A few bilateral                                   | 57 [57]<br><br>I: 29<br>C: 28<br><br>Co: 70 shoulders     | ∅<br><br>I: 56.2 (11.3)<br>C: 58.3 (88.3)   | 36/21<br><br>I: 15/14<br>C: 21/7  | Hawkins–Kennedy<br>Neer<br><br>Painful Arc<br><br>Injection Test | SPADI<br>Western Ontario (Worc)<br>VAS<br><br>T2 | "We considered that combination of physical therapy and water-based exercise is an effective approach in SIS management."                                                                                               | <b>Bilateral</b>                        |
| 182 | Subasi<br>2014<br><br>[182]<br><br>Turkey        | I: Steroid Bethamethasone + Prilocaine + Exercise<br><br>C: Kinesiological Taping + Exercise<br><br>F&D: 3 months exercise training<br>C: Once a week three times                                | A: Not Specified<br><br>D: >1<br>I: 2.7 (1.3)<br>C: 2.9 (1.5)                                                           | 70 [70]<br><br>I: 35<br>C: 35                             | ∅<br><br>I: 54.29 (10.4)<br>C: 53.46 (10.7) | 47/23<br><br>I: 27/8<br>C: 20/15  | Hawkins–Kennedy<br>Neer<br>Speed<br>Yergason<br><br>Painful Arc  | AROM<br>SPADI<br>VAS<br><br>T3                   | "Kinesiological taping and steroid injection in conjunction with an exercise program can be beneficial in the rehabilitation of SIS."                                                                                   | <b>Female: +</b>                        |

| ID  | Authors<br>Year<br>Reference<br>Country                   | INTERVENTION/CONTROLS:<br>I: INTERVENTIONS<br>C: CONTROLS<br>1: GROUP 1<br>2: GROUP 2<br>3: GROUP 3<br>4: GROUP 4<br>5: GROUP 5<br><br>F&D: Frequency of Treatment, Duration<br>of Treatment Period | Clinical<br>Aspects:<br><br>A: Inclusion<br>Age<br>D: Duration<br>of<br>Symptoms<br>(months if<br>not stated<br>otherwise)<br>Co:<br>Comment | N:<br>Included<br>[Random<br>ized]<br><br>Analysed<br>:<br>I:<br>C: | Mean<br>age (SD,<br>Range)                      | Female/<br>Male                   | Inclusion<br>based on Test<br>to confirm<br>Diagnosis                        | Relevant<br>Outcome/<br>Time of<br>assess-<br>ment | Conclusion of Study-<br>Authors                                                                                                                                                                                                                                             | Remarks                  |
|-----|-----------------------------------------------------------|-----------------------------------------------------------------------------------------------------------------------------------------------------------------------------------------------------|----------------------------------------------------------------------------------------------------------------------------------------------|---------------------------------------------------------------------|-------------------------------------------------|-----------------------------------|------------------------------------------------------------------------------|----------------------------------------------------|-----------------------------------------------------------------------------------------------------------------------------------------------------------------------------------------------------------------------------------------------------------------------------|--------------------------|
| 183 | Szczurko<br>2009<br><br>[183]<br><br>Canada               | I: Naturopathic Treatments<br><br>C: Standardized Physical Exercises<br><br>F&D: 12 Sessions in 12 wks.                                                                                             | A: 18-65<br><br>D: >6 wks.<br><br>Co: Unilateral                                                                                             | 103 [89]<br><br>I: 43<br>C: 42                                      | Ø<br><br>I: 50.7<br>(8.16)<br>C: 50.9<br>(7.86) | 50/35<br><br>I: 25/18<br>C: 25/17 | Neer<br>Speed                                                                | AROM<br>SPADi<br>VAS<br><br>T1                     | "Naturopathic care (NC)<br>and PE provided<br>significant<br>improvements, with<br>greater improvement in<br>shoulder function in the<br>NC group compared with<br>the PE group."                                                                                           | <b>Unilateral</b>        |
| 184 | Thelen.<br>2008<br><br>[184]<br><br>USA                   | I: Treatment Kinesio Tape<br><br>C: Sham Kinesio Tape<br><br>F&D: Twice with interval of 3 days                                                                                                     | A: 18-50<br><br>D: <6<br><br>I: 19 (5-35)<br>C: 8 (5 -30)<br><br>Co: College<br>students                                                     | 42 [42]<br><br>I: 21<br>C: 21                                       | Ø<br><br>I: 21.3<br>(1.7)<br>C: 19.8<br>(1.5)   | 6/36<br><br>I: 2/19<br>C: 4/17    | Hawkins-<br>Kennedy<br><br>Pain onset prior<br>to 150°<br><br>Empty can test | AROM<br>SPADi<br>VAS<br><br>T1                     | "Kinesio Tape (KT) may<br>assist clinicians to obtain<br>immediate improvement<br>in pain-free shoulder<br>abduction ROM.<br>However, over time, KT<br>appears to be no more<br>efficacious than sham<br>taping at decreasing<br>shoulder pain intensity or<br>disability." | Male: +                  |
| 185 | Valtonen<br>1978<br><br>[185]<br><br>Finland              | 1: Local steroid subacromial injection<br><br>2: Gluteal injection<br><br>3 Placebo<br><br>F&D: One single injection                                                                                | A: 30-80<br><br>D: Not<br>Specified                                                                                                          | 180 [180]<br><br>1: 90<br>2: 60<br>3: 30                            | Ø<br><br>Not<br>Specified                       | 131/49                            | Not<br>Specified                                                             | VAS<br>AROM<br><br>T1/T2                           | "Results indicate that<br>betamethasone is a good<br>treatment for<br>supraspinatus tendinitis."                                                                                                                                                                            | No data<br>Extractable   |
| 186 | Van<br>Rensburg<br>2012<br><br>[186]<br><br>Great Britain | I: Spinal Thrust and Physical Therapy<br><br>C: Physical Therapy<br><br>F&D: Once weekly for 6 wks.                                                                                                 | A: 18-65<br><br>D: >1 wk.<br>I: 9 (1-24)<br>C: 5 (4-6)<br><br>Co: Pilot<br>study                                                             | 35 [9]<br><br>I: 6<br>C: 3                                          | Ø<br><br>I: 53 (41-<br>60)<br>C: 60 (58-<br>65) | 3/6<br><br>I: 2/4<br>C: 1/2       | Hawkins-<br>Kennedy<br>Neer<br><br>Painful Arc                               | DASH<br><br>T1                                     | "The possibility that<br>addition of thoracic spine<br>treatment reduces the<br>number of treatment<br>Sessions to gain good<br>shoulder function leads<br>to consideration of a<br>cost-benefit analysis in a<br>future definitive study."                                 | Small<br>Sample<br>Study |

| ID  | Authors<br>Year<br>Reference<br>Country           | INTERVENTION/CONTROLS:<br>I: INTERVENTIONS<br>C: CONTROLS<br>1: GROUP 1<br>2: GROUP 2<br>3: GROUP 3<br>4: GROUP 4<br>5: GROUP 5<br><br>F&D: Frequency of Treatment, Duration<br>of Treatment Period | Clinical<br>Aspects:<br><br>A: Inclusion<br>Age<br>D: Duration<br>of<br>Symptoms<br>(months if<br>not stated<br>otherwise)<br>Co:<br>Comment | N:<br>Included<br>[Random<br>ized]<br><br>Analysed<br>:<br>I:<br>C: | Mean<br>age (SD,<br>Range)                                              | Female/<br>Male                                               | Inclusion<br>based on Test<br>to confirm<br>Diagnosis                                  | Relevant<br>Outcome/<br>Time of<br>assessment | Conclusion of Study-<br>Authors                                                                                                                    | Remarks                  |
|-----|---------------------------------------------------|-----------------------------------------------------------------------------------------------------------------------------------------------------------------------------------------------------|----------------------------------------------------------------------------------------------------------------------------------------------|---------------------------------------------------------------------|-------------------------------------------------------------------------|---------------------------------------------------------------|----------------------------------------------------------------------------------------|-----------------------------------------------|----------------------------------------------------------------------------------------------------------------------------------------------------|--------------------------|
| 187 | Vecchio<br>1993<br><br>[187]<br><br>Great Britain | I: Low Level Laser<br><br>C: Sham Low Level Laser<br><br>F&D: Twice weekly for 8 wks.                                                                                                               | A: Not<br>Specified<br><br>D:<br>14.9 (4-48)                                                                                                 | 35 [35]<br><br>I: 19<br>C: 16                                       | Ø 54.4<br>(17-77)                                                       | 25/10<br><br>I: 11/8<br>C: 14/2                               | Cyriax Criteria<br><br>Painful Arc                                                     | VAS<br><br>T1                                 | "Conclude that standard<br>low level laser is no<br>better than placebo in<br>treatment of rotator cuff<br>tendinitis."                            | <b>Female: +</b>         |
| 188 | Vecchio<br>1993<br><br>[188]<br><br>Great Britain | I: Lignocaine Injection<br><br>C: Steroid + Lignocaine Injection<br><br>F&D: One single injection                                                                                                   | A: Not<br>Specified<br><br>D: wks.<br>I: 4 (2-8)<br>C: 5 (3.5-9.5)                                                                           | 35 [55]<br><br>I: 27<br>C: 28                                       | Ø<br><br>I: 56.5<br>(52-69)<br>C: 56.0<br>(45-68.5)                     | 32/23                                                         | Cyriax Criteria<br><br>Resistance<br>Test                                              | AROM<br>VAS<br><br>T1/T2/T3                   | "Conclude that<br>subacromial steroid<br>methylprednisolone and<br>lignocaine is no better<br>than lignocaine alone in<br>treatment of early RCT." |                          |
| 189 | Vecchio<br>1993<br><br>[189]<br><br>Great Britain | I: Suprascapular Nerve Block<br><br>C: Sham Nerve Block with Saline<br><br>F&D: One Single Shot                                                                                                     | A: Not<br>Specified<br><br>D:<br>I: 30.3<br>C: 33.6<br><br>Tears:<br>I: 48.0<br>C: 40.5                                                      | 28 [28]<br><br>I: 10<br>C: 5<br><br>Tears:<br>I: 5<br>C: 8          | Ø:<br><br>I: 54.8<br>C: 47.6<br><br>Tears:<br>I: 70<br>C: 70            | 6/9<br><br>I: 4/6<br>C: 2/3<br><br>Tears:<br>I: 3/2<br>C: 6/2 | Shoulder Pain<br>>6 months<br><br>Cyriax Criteria<br><br>2 local steroid<br>Injections | AROM<br>VAS<br><br>T1/T2/T3                   | "Suprascapular nerve<br>block is an effective but<br>temporary form of<br>analgesia for rotator cuff<br>lesions."                                  | Small<br>Sample<br>Study |
| 190 | Walther<br>2004<br><br>[190]<br><br>Germany       | 1: Guided self Training (Theraband)<br><br>2: Conventional Physiotherapy<br><br>3: Functional Brace (12 hrs. a day)<br><br>F&D: Over a period of 12<br>C: 10 to 30 Sessions                         | A: Not<br>Specified<br><br>D:<br>1: 23 (3-72)<br>2: 32 (2-120)<br>3: 27 (5-60)                                                               | 60 [60]<br><br>1: 20<br>2: 20<br>3: 20                              | Ø<br><br>1: 48.6<br>(25-61)<br>2: 51.5<br>(37-66)<br>3: 48.6<br>(25-61) | 26/34<br><br>1: 11/9<br>2: 9/11<br>3: 6/14                    | Injection Test                                                                         | Constant<br>VAS<br><br>T1                     | "All three groups showed<br>a significant<br>improvement in shoulder<br>function as well as a<br>significant reduction in<br>pain."                | No data<br>Extractable   |

| ID  | Authors<br>Year<br>Reference<br>Country             | INTERVENTION/CONTROLS:<br>I: INTERVENTIONS<br>C: CONTROLS<br>1: GROUP 1<br>2: GROUP 2<br>3: GROUP 3<br>4: GROUP 4<br>5: GROUP 5<br><br>F&D: Frequency of Treatment, Duration<br>of Treatment Period | Clinical<br>Aspects:<br><br>A: Inclusion<br>Age<br>D: Duration<br>of<br>Symptoms<br>(months if<br>not stated<br>otherwise)<br>Co:<br>Comment | N:<br>Included<br>[Random<br>ized]<br><br>Analysed<br>:<br>I:<br>C:  | Mean<br>age (SD,<br>Range)                                                                                           | Female/<br>Male                                                                      | Inclusion<br>based on Test<br>to confirm<br>Diagnosis                                                                     | Relevant<br>Outcome/<br>Time of<br>assessment | Conclusion of Study-<br>Authors                                                                                                                                                                                                                                                                         | Remarks                  |
|-----|-----------------------------------------------------|-----------------------------------------------------------------------------------------------------------------------------------------------------------------------------------------------------|----------------------------------------------------------------------------------------------------------------------------------------------|----------------------------------------------------------------------|----------------------------------------------------------------------------------------------------------------------|--------------------------------------------------------------------------------------|---------------------------------------------------------------------------------------------------------------------------|-----------------------------------------------|---------------------------------------------------------------------------------------------------------------------------------------------------------------------------------------------------------------------------------------------------------------------------------------------------------|--------------------------|
| 191 | Watson J.<br>2008<br><br>[191]<br><br>Great Britain | General Practitioner Training:<br>Trained/Untrained<br><br>I: Oral and Steroid Injection<br><br>C: Oral and Lignocaine Injection<br><br>F&D: One Single Shot                                        | A: >16<br><br>D: <12<br>1: Trained<br>6.5 (1-40)<br>2: Untrained<br>8 (1-52)<br>3: Experts<br>7 (1-40)<br><br>Co: Unilateral<br>/Bilateral   | 200 [200]<br><br>I: 99<br>C: 101<br><br>At 1 year:<br>I: 91<br>C: 88 | Ø<br>1:<br>Trained<br>59 (14.2)<br><br>2:<br>Untrained<br>58.09<br>(11.52)<br><br>3:<br>Experts:<br>54.55<br>(15.79) | 1:<br>Trained<br>55/51<br><br>2:<br>Untrained<br>27/22<br><br>3:<br>Experts<br>23/22 | Clinical<br>diagnosis of<br>rotator cuff<br>tendinitis.<br><br>Mild restrictions<br>of passive<br>movement<br>acceptable. | BSDQ<br><br>T1                                | "Training GPs in the<br>diagnosis and treatment<br>of shoulder disorders<br>does not make any<br>difference to the<br>outcome, in terms of pain<br>and disability, 1 year<br>later. Further, there is no<br>advantage to injecting<br>steroid in a group with<br>predominant rotator cuff<br>disorder." |                          |
| 192 | Werner<br>2002<br><br>[192]<br><br>Germany          | I: Standardized Home-Training<br><br>C: Physiotherapy<br><br>F&D: 10 Sessions in 3 mos.                                                                                                             | A: Not<br>Specified<br><br>D:<br>I: 23<br>C: 32                                                                                              | 40 [40]<br><br>I: 20<br>C: 20                                        | Ø:<br><br>I: 52 (40-<br>66)<br>C: 51.5<br>(37-66)                                                                    | 20/20<br><br>I: 11/9<br>C: 9/11                                                      | Clinical Exam<br><br>US                                                                                                   | Constant<br><br>T1                            | "Self training after<br>instruction showed no<br>difference to<br>physiotherapist-<br>supervised exercises in<br>the non-operative<br>treatment of<br>SIS."                                                                                                                                             | No data<br>Extractable   |
| 193 | White<br>1986<br><br>[193]<br><br>USA               | I: Oral Indomethacin 100 mg /day plus<br>Saline Injection<br><br>C: Placebo Capsule plus Local<br>Corticosteroid 40 mg Triamcinolone<br><br>F&D: Second injection if necessary                      | A: Not<br>Specified<br><br>D: >3                                                                                                             | 40 [40]<br><br>I: 15<br>C: 15                                        | Ø<br>(22-81)<br>I: 54 (15)<br>C: 55 (15)                                                                             | 25/15<br><br>I: 15/5<br>C: 10/10                                                     | Painful Arc<br>Painful<br>Movement<br><br>Injection Test                                                                  | VAS<br><br>T1/T2                              | "Study suggests that<br>there is essentially no<br>difference in the short<br>term efficacy of oral non<br>steroidal therapy<br>compared to local<br>corticosteroid injection."                                                                                                                         |                          |
| 194 | Wiener<br>2005<br><br>[194]<br><br>Great Britain    | I: Physiotherapy<br><br>C: Wait and See<br><br>F&D: 10 Sessions in 4 wks.                                                                                                                           | A: Not<br>Specified<br><br>D: Not<br>Specified                                                                                               | 17 [17]<br><br>I: 8<br>C: 9                                          | Not<br>Specified                                                                                                     | Not<br>Specified                                                                     | Painful Arc<br><br>No further<br>explained                                                                                | McGill<br>PDI<br><br>T1                       | "Physiotherapy helps to<br>build up the muscular<br>strength of the cuff but<br>the influence on pain<br>remains essential to<br>improve weakness in<br>painful movements."                                                                                                                             | Small<br>Sample<br>Study |



| ID  | Authors<br>Year<br>Reference<br>Country     | INTERVENTION/CONTROLS:<br>I: INTERVENTIONS<br>C: CONTROLS<br>1: GROUP 1<br>2: GROUP 2<br>3: GROUP 3<br>4: GROUP 4<br>5: GROUP 5<br><br>F&D: Frequency of Treatment, Duration<br>of Treatment Period                                                        | Clinical<br>Aspects:<br><br>A: Inclusion<br>Age<br>D: Duration<br>of<br>Symptoms<br>(months if<br>not stated<br>otherwise)<br>Co:<br>Comment | N:<br>Included<br>[Random<br>ized]<br><br>Analysed<br>:<br>I:<br>C: | Mean<br>age (SD,<br>Range)                         | Female/<br>Male                   | Inclusion<br>based on Test<br>to confirm<br>Diagnosis                                           | Relevant<br>Outcome/<br>Time of<br>assessment | Conclusion of Study-<br>Authors                                                                                                                                                                                                                                                                                             | Remarks |
|-----|---------------------------------------------|------------------------------------------------------------------------------------------------------------------------------------------------------------------------------------------------------------------------------------------------------------|----------------------------------------------------------------------------------------------------------------------------------------------|---------------------------------------------------------------------|----------------------------------------------------|-----------------------------------|-------------------------------------------------------------------------------------------------|-----------------------------------------------|-----------------------------------------------------------------------------------------------------------------------------------------------------------------------------------------------------------------------------------------------------------------------------------------------------------------------------|---------|
| 195 | Wright<br>2016<br><br>[195]<br><br>USA      | I: Cervicothoracic spinal thrust/non-thrust<br>manipulation in addition to shoulder manual<br>therapy and exercise<br><br>C: Manual therapy and exercise<br><br>F&D: two times per week for 45-min<br>sessions, until discharge at 4 wks.<br>Home exercise | A: >18<br><br>D:<br>Not specified<br>in mean/SD                                                                                              | 64 [21]<br><br>I: 12/10<br>C: 9/8                                   | ∅<br><br>I: 46.3<br>(15.9)<br>C: 39.1<br>(15.8)    | 9/9<br><br>I: 5/5<br>C: 4/4       | Hawkins–<br>Kennedy<br><br>Painful Arc                                                          | AROM<br>NPRS<br>SPADI<br><br>T1               | “The results indicated that<br>in this study the addition<br>of cervicothoracic spinal<br>thrust/ non-thrust to the<br>shoulder-only treatment<br>did not significantly<br>improve pain or function<br>in those patients with<br>a clinical diagnosis of SIS<br>when the cervical spine<br>was cleared for<br>involvement.” |         |
| 196 | Yavuz<br>2014<br><br>[196]<br><br>Turkey    | I: Low Level Laser Therapy + Hot Pack +<br>Exercise<br><br>C: US Therapy + Hot Pack + Exercise<br><br>F&D: 10 Sessions for 2 wks.                                                                                                                          | A: Not<br>Specified<br><br>D:<br>I: 6.7 (4.8)<br>C: 6.3 (5.2)                                                                                | 39 [31]<br><br>I: 16<br>C: 15                                       | ∅<br><br>I: 44.2<br>(8.2)<br>C: 45.3<br>(9.8)      | 14/17<br><br>I: 7/9<br>C: 7/8     | Hawkins–<br>Kennedy<br>Neer<br><br>Painful Arc<br><br>Injection Test<br><br>MRI<br>(Stage I/II) | SPADI<br>VAS<br><br>T2/T3                     | “That efficacy of both<br>treatments were<br>comparable to each<br>other in regarding<br>reducing pain severity<br>and functional disability<br>in patients with SAIS.”                                                                                                                                                     |         |
| 197 | Yazmalar<br>2016<br><br>[197]<br><br>Turkey | I: Continuous Ultrasound, TENS and<br>exercise<br><br>C: Sham ultrasound, TENS and exercise<br><br>F&D: 15 sessions in 3 weeks                                                                                                                             | A: 18-65<br><br>D: >3<br>I: 14.15<br>(13.27)<br>C: 11.63<br>(12.95)                                                                          | 173 [51]<br><br>I: 26<br>C: 25/24                                   | ∅<br><br>I: 53.77<br>(11.01)<br>C: 50.0<br>(29.05) | 22/28<br><br>I: 10/16<br>C: 12/12 | Hawkins–<br>Kennedy<br>Neer<br><br>MRI                                                          | SPADI<br>NHP<br><br>T1                        | “Our study showed that<br>US does not have any<br>benefits on SIS. TENS +<br>exercise program are not<br>effective on anxiety,<br>depression and fatigue,<br>however TENS + exercise<br>program are effective on<br>pain, disability and sleep<br>disturbance in patients<br>with SIS.”                                     |         |

| ID  | Authors<br>Year<br>Reference<br>Country     | INTERVENTION/CONTROLS:<br>I: INTERVENTIONS<br>C: CONTROLS<br>1: GROUP 1<br>2: GROUP 2<br>3: GROUP 3<br>4: GROUP 4<br>5: GROUP 5<br><br>F&D: Frequency of Treatment, Duration<br>of Treatment Period  | Clinical<br>Aspects:<br><br>A: Inclusion<br>Age<br>D: Duration<br>of<br>Symptoms<br>(months if<br>not stated<br>otherwise)<br>Co:<br>Comment | N:<br>Included<br>[Random<br>ized]<br><br>Analysed<br>:<br>I:<br>C: | Mean<br>age (SD,<br>Range)                       | Female/<br>Male                   | Inclusion<br>based on Test<br>to confirm<br>Diagnosis                                       | Relevant<br>Outcome/<br>Time of<br>assess-<br>ment | Conclusion of Study-<br>Authors                                                                                                                                                                                                                        | Remarks                                        |
|-----|---------------------------------------------|------------------------------------------------------------------------------------------------------------------------------------------------------------------------------------------------------|----------------------------------------------------------------------------------------------------------------------------------------------|---------------------------------------------------------------------|--------------------------------------------------|-----------------------------------|---------------------------------------------------------------------------------------------|----------------------------------------------------|--------------------------------------------------------------------------------------------------------------------------------------------------------------------------------------------------------------------------------------------------------|------------------------------------------------|
| 198 | Yeldan<br>2009<br><br>[198]<br><br>Turkey   | I: Low Level Laser + Exercise<br><br>C: Placebo + Exercise<br><br>F&D: program for 3 wks.                                                                                                            | A: Not<br>Specified<br><br>D:<br>I: 6.5 (4.52)<br>C: 6.42 (4.79)                                                                             | 67 [67]<br><br>I: 34<br>C: 33/26                                    | ∅<br><br>I: 55.32<br>(8.73)<br>C: 55.0<br>(8.75) | 47/13<br><br>I: 25/9<br>C: 22/4   | At least 3:<br>Painful Arc<br>Pain with<br>resisted ABD<br><br>Hawkins –<br>Kennedy<br>Neer | DASH<br>Constant<br>VAS<br><br>T1                  | „No fundamental<br>differences between low<br>level laser therapy<br>(LLLT) and placebo<br>when they are<br>supplementing an<br>exercise program for<br>rehabilitation of patients<br>with SIS.”                                                       | <b>Female: +</b><br><br>No data<br>Extractable |
| 199 | Yildirim<br>2013<br><br>[199]<br><br>Turkey | I: Ultrasound (4 min) + Superficial Heat +<br>TENS + Exercise<br><br>C: Ultrasound (8 min) + Exercise<br><br>F&D: 15 Sessions                                                                        | A: Not<br>Specified<br><br>D: Not<br>Specified<br><br>I: 8.34 (4.86)<br>C: 6.66 (4.91)                                                       | 100 [100]<br><br>I: 50<br>C: 50                                     | ∅<br><br>I: 55.4<br>(7.63)<br>C: 54.7<br>(8.67)  | 61/39<br><br>I: 34/16<br>C: 27/23 | Hawkins–<br>Kennedy<br>Neer<br>Yergason<br>Jobe<br><br>Painful Arc<br>Drop arm<br><br>MRI   | Constant<br>UCLA<br>VAS<br><br>T1                  | “Ultrasound therapy was<br>effective at decreasing<br>pain and improving<br>functionality. We showed<br>that 8 minutes of ultra-<br>sound administration<br>was more effective than<br>4 minutes at relieving<br>pain and improving<br>functionality.” |                                                |
| 200 | Yilmaz<br>2008<br><br>[200]<br><br>Turkey   | 1: 40 mg Methylprednisolone acetate: Sub-<br>acromial<br><br>2: 40 mg Methylprednisolone acetate:<br>Deltoid<br><br>3: 40 mg Methylprednisolone acetate:<br>Gluteal<br><br>F&D: One Single Injection | A: Not<br>Specified<br><br>D: >3<br><br>11 (3-48)                                                                                            | 30 [30]<br><br>1: 10<br>2: 10<br>3: 10                              | ∅ 52 (23-<br>67)                                 | 18/12                             | Impingement<br>sign<br><br>Speed<br><br>MRI                                                 | Constant<br>VAS<br><br>T3                          | “Intra-deltoid steroid<br>delivery may be an<br>appropriate alternative to<br>avoid rotator cuff injury<br>associated with repeated<br>sub-acromial injections.”                                                                                       | No data<br>Extractable                         |

Legend: Articles written in English language (n = 193), German language (n = 5), Others (n = 2). Studies were performed in Asia (n = 65), Turkey and Iran (n = 52), Europe (n = 97), North- and South-America (n = 29), Australia (n = 4) and four in South Africa.

## References

1. Abrisham SM, Kermani-Alghoraishi M, Ghahramani R, Jabbari L, Jomeh H, Zare M. Additive effects of low-level laser therapy with exercise on subacromial syndrome: a randomised, double-blind, controlled trial. *Clinical rheumatology* 2011;**30**(10):1341-6 doi: 10.1007/s10067-011-1757-7.
2. Adebajo AO, Nash P, Hazleman BL. A prospective double blind dummy placebo controlled study comparing triamcinolone hexacetonide injection with oral diclofenac 50 mg TDS in patients with rotator cuff tendinitis. *The Journal of rheumatology* 1990;**17**(9):1207-10.
3. Akgun K, Birtane M, Akarirmak U. Is local subacromial corticosteroid injection beneficial in subacromial impingement syndrome? *Clinical rheumatology* 2004;**23**(6):496-500 doi: 10.1007/s10067-004-0930-7.
4. Akkaya N, Akkaya S, Gungor HR, Yasar G, Atalay NS, Sahin F. Effects of weighted and un-weighted pendulum exercises on ultrasonographic Acromiohumeral distance in patients with subacromial impingement syndrome. *Journal of back and musculoskeletal rehabilitation* 2016 doi: 10.3233/bmr-160737.
5. Aksakal M, Ermutlu C, Ozkaya G, Ozkan Y. Lornoxicam injection is inferior to betamethasone in the treatment of subacromial impingement syndrome : A prospective randomized study of functional outcomes. *Der Orthopade* 2016 doi: 10.1007/s00132-016-3302-5.
6. Aktas I, Akgun K, Cakmak B. Therapeutic effect of pulsed electromagnetic field in conservative treatment of subacromial impingement syndrome. *Clinical rheumatology* 2007;**26**(8):1234-9 doi: 10.1007/s10067-006-0464-2.
7. Akyol Y, Ulus Y, Durmus D, et al. Effectiveness of microwave diathermy on pain, functional capacity, muscle strength, quality of life, and depression in patients with subacromial impingement syndrome: a randomized placebo-controlled clinical study. *Rheumatology international* 2012;**32**(10):3007-16 doi: 10.1007/s00296-011-2097-2.
8. Al Dajah SB. Soft Tissue Mobilization and PNF Improve Range of Motion and Minimize Pain Level in Shoulder Impingement. *Journal of physical therapy science* 2014;**26**(11):1803-5 doi: 10.1589/jpts.26.1803.
9. Alvarez CM, Litchfield R, Jackowski D, Griffin S, Kirkley A. A prospective, double-blind, randomized clinical trial comparing subacromial injection of betamethasone and xylocaine to xylocaine alone in chronic rotator cuff tendinosis. *The American journal of sports medicine* 2005;**33**(2):255-62.
10. Álvarez-Nemegyei J, Bassol-Perea A, Pasos JR. Efficacy of the local injection of methylprednisolone acetate in the subacromial impingement syndrome. A randomized, double-blind trial. *Reumatología Clínica (English Edition)* 2008;**4**(2):49-54.
11. Ammer K, Mayr H. Magnetfeldtherapie bei tendopathischer periartropathia humeroscapularis (Magnetic field therapy in case of tendopathic periartropathia humeroscapularis -- report of a double-blind study) [German]. *Orthopadische Praxis* 1991;**27**:696-699 1991.
12. Pinar Doruk Analan, Berrin Leblebici, Mehmet Adam. Effects of therapeutic ultrasound and exercise on pain, function, and isokinetic shoulder rotator strength of patients with rotator cuff disease. *Journal of physical therapy science* 2015;**27**(10):3113-17 5p.
13. Arias-Burria JL ST-D, Raquel Valero-Alcaide, Jaime Salom-Moreno, Maria A. Atim-Arratibel, Cesar Fernandez-de-las-Penas. Ultrasound-Guided Percutaneous Electrolysis and Eccentric Exercises for Subacromial Pain Syndrome: A Randomized Clinical Trial. *Evidence-based Complementary & Alternative Medicine (eCAM)* 2015:1-9 9p doi: 10.1155/2015/315219.
14. Arias-Buría JL, Fernández-de-las-Peñas C, Palacios-Ceña M, Koppenhaver SL, Salom-Moreno J. Exercises and Dry Needling for Subacromial Pain Syndrome: A Randomized Parallel-Group Trial. *Journal of Pain* 2017;**18**(1):11-18 doi: 10.1016/j.jpain.2016.08.013.
15. Atkinson M, Mathews R, Brantingham JW, et al. A randomized controlled trial to assess the efficacy of shoulder manipulation versus placebo in the treatment of shoulder pain due to rotator cuff tendinopathy. *Journal of the American Chiropractic Association* 2008 Dec;**45**(9):11-26 2008.
16. Atya AM. Efficacy of microcurrent electrical stimulation on pain, proprioception accuracy and functional disability in subacromial impingement: RCT. *Indian Journal of Physiotherapy and Occupational Therapy* 2012 Jan-Mar;**6**(1):15-18 2012.

17. Aytar A, Baltaci G, Uhl TL, Tuzun H, Oztop P, Karatas M. The effects of scapular mobilization in patients with subacromial impingement syndrome: a randomized, double-blind, placebo-controlled clinical trial. *J Sport Rehabil* 2015;**24**(2):116-29 doi: 10.1123/jsr.2013-0120.
18. Bae YH, Lee GC, Shin WS, Kim TH, Lee SM. Effect of motor control and strengthening exercises on pain, function, strength and the range of motion of patients with shoulder impingement syndrome. *Journal of Physical Therapy Science* 2011 Aug;**23**(4):687-692 2011.
19. Bal A, Eksioglu E, Gurcay E, Gulec B, Karaahmet O, Cakci A. Low-level laser therapy in subacromial impingement syndrome. *Photomedicine and laser surgery* 2009;**27**(1):31-6 doi: 10.1089/pho.2007.2222.
20. Bang MD, Deyle GD. Comparison of supervised exercise with and without manual physical therapy for patients with shoulder impingement syndrome. *The Journal of orthopaedic and sports physical therapy* 2000;**30**(3):126-37 doi: 10.2519/jospt.2000.30.3.126.
21. Bansal K, Padamkumar S. A comparative study between the efficacy of therapeutic ultrasound and soft tissue massage (deep friction massage) in supraspinatus tendinitis. *Indian Journal of Physiotherapy and Occupational Therapy* 2011 Apr-Jun;**5**(2):80-84 2011.
22. Barbosa RI, Goes R, Mazzer N, Fonseca MCR. A influencia da mobilizacao articular nas tendinopatias dos m<sup>o</sup>sculos biceps braquial e supra-espinal (The influence of joint mobilization on tendinopathy of the biceps brachii and supraspinatus muscles) [Portuguese]. *Revista Brasileira de Fisioterapia [Brazilian Journal of Physical Therapy]* 2008 Jul-Aug;**12**(4):298-303 2008.
23. Barra Lopez ME, Lopez C, Fernandez G, Murillo E, Villar E, Raya L. The immediate effects of diacutaneous fibrolysis on pain and mobility in patients suffering from painful shoulder: a randomized placebo-controlled pilot study [with consumer summary]. *Clinical Rehabilitation* 2011 Apr;**25**(4):339-348 2011.
24. Barra Lopez ME, Lopez de Celis C, Fernandez Jentsch G, Raya de Cardenas L, Lucha Lopez MO, Tricas Moreno JM. Effectiveness of Diacutaneous Fibrolysis for the treatment of subacromial impingement syndrome: a randomised controlled trial. *Manual therapy* 2013;**18**(5):418-24 doi: 10.1016/j.math.2013.02.006.
25. Barra-Lopez ME, Castillo-Tomas S, Gonzalez-Rueda V, Villar-Mateo E, Domene-Guinart N, Lopez-de-Celisa C. Efectividad del masaje funcional en el sindrome de impingement subacromial (Functional massage effectiveness in subacromial impingement syndrome) [Spanish]. *Fisioterapia* 2015 Mar-Apr;**37**(2):75-82 2015.
26. Baskurt Z, Baskurt F, Ozcan A, Yilmaz O. The immediate effects of heat and TENS on pressure pain threshold and pain intensity in patients with Stage I shoulder impingement syndrome. *Pain Clinic* 2006; **18**(1).
27. Baskurt Z, Baskurt F, Gelecek N, Ozkan MH. The effectiveness of scapular stabilization exercise in the patients with subacromial impingement syndrome. *Journal of back and musculoskeletal rehabilitation* 2011;**24**(3):173-9 doi: 10.3233/BMR-2011-0291.
28. Bayram KB, Bal S, Satoglu IS, et al. Does Suprascapular Nerve Block Improve Shoulder Disability in Impingement Syndrome? A Randomized Placebo-Controlled Study. *Journal of Musculoskeletal Pain* 2014;**22**(2):170-74.
29. Beaudreuil J, Lasbleiz S, Richette P, et al. Assessment of dynamic humeral centering in shoulder pain with impingement syndrome: a randomised clinical trial. *Annals of the rheumatic diseases* 2011;**70**(9):1613-8 doi: 10.1136/ard.2010.147694.
30. Beaudreuil J, Lasbleiz S, Aout M, et al. Effect of dynamic humeral centring (DHC) treatment on painful active elevation of the arm in subacromial impingement syndrome. Secondary analysis of data from an RCT [with consumer summary]. *British Journal of Sports Medicine* 2013 Mar 23: Epub ahead of print 2013.
31. Bennell K, Wee E, Coburn S, et al. Efficacy of standardised manual therapy and home exercise programme for chronic rotator cuff disease: randomised placebo controlled trial [with consumer summary]. *BMJ* 2010 Jun 8;**340**:c2756 2010.
32. Berry H, Fernandes L, Bloom B, Clark RJ, Hamilton EB. Clinical study comparing acupuncture, physiotherapy, injection and oral anti-inflammatory therapy in shoulder-cuff lesions. *Current Medical Research and Opinion* 1980;**7**(2):121-126 1980.

33. Bialoszewski D, Zaborowski G. Usefulness of manual therapy in the rehabilitation of patients with chronic rotator cuff injuries. Preliminary report. *Ortopedia, traumatologia, rehabilitacja* 2011;**13**(1):9-20.
34. Binder A, Parr G, Hazleman B, Fitton-Jackson S. Pulsed electromagnetic field therapy of persistent rotator cuff tendinitis. A double-blind controlled assessment. *Lancet* 1984;**1**(8379):695-8.
35. Bjornsson Hallgren HC, Holmgren T, Oberg B, Johansson K, Adolfsson LE. A specific exercise strategy reduced the need for surgery in subacromial pain patients. *British journal of sports medicine* 2014 doi: 10.1136/bjsports-2013-093233.
36. Blair B, Rokito AS, Cuomo F, Jarolem K, Zuckerman JD. Efficacy of injections of corticosteroids for subacromial impingement syndrome. *The Journal of bone and joint surgery. American volume* 1996;**78**(11):1685-9.
37. Blume C, Wang-Price S, Trudelle-Jackson E, Ortiz A. COMPARISON OF ECCENTRIC AND CONCENTRIC EXERCISE INTERVENTIONS IN ADULTS WITH SUBACROMIAL IMPINGEMENT SYNDROME. *International journal of sports physical therapy* 2015;**10**(4):441-55.
38. Boeck RL, Döhnert MB, Pavão TS. [Open kinetic chain versus closed kinetic chain in advanced rehabilitation rotator cuff]. *Fisioterapia em Movimento* 2012; **25**(2).
39. Bron C, de Gast A, Dommerholt J, Stegenga B, Wensing M, Oostendorp RAB. Treatment of myofascial trigger points in patients with chronic shoulder pain: a randomized, controlled trial. *BMC Medicine* 2011 Jan 24;**9**(8):Epub 2011.
40. Brox JI, Staff PH, Ljunggren AE, Brevik JI. Arthroscopic surgery compared with supervised exercises in patients with rotator cuff disease (stage II impingement syndrome) [with consumer summary]. *BMJ* 1993 Oct 9;**307**(6909):899-903 1993.
41. Brox JI, Gjengedal E, Uppheim G, et al. Arthroscopic surgery versus supervised exercises in patients with rotator cuff disease (stage II impingement syndrome): a prospective, randomized, controlled study in 125 patients with a 2.5-year follow-up. *Journal of Shoulder and Elbow Surgery* 1999 Mar-Apr;**8**(2):102-111 1999.
42. Byun SD, Park DH, Choi WD, Lee ZI. Subacromial Bursa Injection of Hyaluronate with Steroid in Patients with Peri-articular Shoulder Disorders. *Annals of rehabilitation medicine* 2011;**35**(5):664-72 doi: 10.5535/arm.2011.35.5.664.
43. Byun SD, Hong YH, Hong SK, et al. Effects of repeated steroid injection at subacromial bursa with different interval. *Annals of rehabilitation medicine* 2014;**38**(6):805-11 doi: 10.5535/arm.2014.38.6.805.
44. Calis HT, Berberoglu N, Calis M. Are ultrasound, laser and exercise superior to each other in the treatment of subacromial impingement syndrome? A randomized clinical trial. *European journal of physical and rehabilitation medicine* 2011;**47**(3):375-80.
45. Camargo PR, Albuquerque-Sendin F, Avila MA, Haik MN, Vieira A, Salvini TF. Effects of Stretching and Strengthening Exercises With and Without Manual Therapy on Scapular Kinematics, Function, and Pain in Individuals With Shoulder Impingement: A Randomized Controlled Trial. *The Journal of orthopaedic and sports physical therapy* 2015:1-34 doi: 10.2519/jospt.2015.5939.
46. Celik D, Akyuz G, Yeldan I. [Comparison of the effects of two different exercise programs on pain in subacromial impingement syndrome]. *Acta Orthop Traumatol Turc* 2009;**43**(6):504-9 doi: 10.3944/aott.2009.504.
47. Celik D, Atalar AC, Guclu A, Demirhan M. [The contribution of subacromial injection to the conservative treatment of impingement syndrome]. *Acta Orthop Traumatol Turc* 2009;**43**(4):331-5 doi: 10.3944/aott.2009.331.
48. Celik D, Atalar AC, Sahinkaya S, Demirhan M. [The value of intermittent ultrasound treatment in subacromial impingement syndrome]. *Acta Orthop Traumatol Turc* 2009;**43**(3):243-7 doi: 10.3944/aott.2009.243.
49. Cha JY, Kim JH, Hong J, et al. A 12-week rehabilitation program improves body composition, pain sensation, and internal/external torques of baseball pitchers with shoulder impingement symptom. *Journal of exercise rehabilitation* 2014;**10**(1):35-44 doi: 10.12965/jer.140087.

50. Chard MD, Hazleman BL, Devereaux MD. Controlled study to investigate dose-response patterns to portable pulsed electromagnetic fields in the treatment of rotator cuff tendinitis. *Journal of Orthopaedic Rheumatology* 1988;1:33-40 1988.
51. Chavez-Lopez MA, Navarro-Soltero LA, Rosas-Cabral A, Gallaga A, Huerta-Yanez G. Methylprednisolone versus triamcinolone in painful shoulder using ultrasound-guided injection. *Modern rheumatology / the Japan Rheumatism Association* 2009;19(2):147-50 doi: 10.1007/s10165-008-0137-x.
52. Chen MJ, Lew HL, Hsu TC, et al. Ultrasound-guided shoulder injections in the treatment of subacromial bursitis. *American journal of physical medicine & rehabilitation / Association of Academic Physiatrists* 2006;85(1,x):31-5.
53. Cheng AS, Hung L. Randomized controlled trial of workplace-based rehabilitation for work-related rotator cuff disorder. *Journal of Occupational Rehabilitation* 2007 Sep;17(3):487-503 2007.
54. Choi WD, Cho DH, Hong YH, Noh JH, Lee ZI, Byun SD. Effects of subacromial bursa injection with corticosteroid and hyaluronidase according to dosage. *Annals of rehabilitation medicine* 2013;37(5):668-74 doi: 10.5535/arm.2013.37.5.668.
55. WY C, JY K, FS W, et al. Effect of sodium hyaluronate treatment on rotator cuff lesions without complete tears: a randomized, double-blind, placebo-controlled study. *Journal of Shoulder & Elbow Surgery* 2010;19(4):557-63.
56. Cift H, Ozkan FU, Tolu S, Seker A, Mahirogullari M. Comparison of subacromial tenoxicam and steroid injections in the treatment of impingement syndrome. *Eklem hastaliklari ve cerrahisi = Joint diseases & related surgery* 2015;26(1):16-20 doi: 10.5606/ehc.2015.05.
57. Citaker S, Taskiran H, Akdur H, Onel Arabaci U, Ekici G. Comparison of the mobilization and proprioceptive neuromuscular facilitation methods in the treatment of shoulder impingement syndrome. *The Pain Clinic* 2005 Jun;17(2):197-202 2005.
58. Cloke DJ, Watson H, Purdy S, Steen IN, Williams JR. A pilot randomized, controlled trial of treatment for painful arc of the shoulder. *Journal of Shoulder and Elbow Surgery* 2008;17(1):S17-S21.
59. Cole BF, Peters KS, Hackett L, Murrell GA. Ultrasound-Guided Versus Blind Subacromial Corticosteroid Injections for Subacromial Impingement Syndrome: A Randomized, Double-Blind Clinical Trial. *The American journal of sports medicine* 2015 doi: 10.1177/0363546515618653.
60. Conroy DE, Hayes KW. The effect of joint mobilization as a component of comprehensive treatment for primary shoulder impingement syndrome. *The Journal of orthopaedic and sports physical therapy* 1998;28(1):3-14 doi: 10.2519/jospt.1998.28.1.3.
61. Cook C, Learman K, Houghton S, Showalter C, O'Halloran B. The addition of cervical unilateral posterior-anterior mobilisation in the treatment of patients with shoulder impingement syndrome: a randomised clinical trial. *Manual therapy* 2014;19(1):18-24 doi: 10.1016/j.math.2013.05.007.
62. Crawshaw DP, Helliwell PS, Hensor EM, Hay EM, Aldous SJ, Conaghan PG. Exercise therapy after corticosteroid injection for moderate to severe shoulder pain: large pragmatic randomised trial. *Bmj* 2010;340:c3037 doi: 10.1136/bmj.c3037.
63. de Freitas DG, Marcondes FB, Monteiro RL, Rosa SG, Fucs P, Fukuda TY. Pulsed Electromagnetic Field and Exercises in Patients With Shoulder Impingement Syndrome: A Randomized, Double-Blind, Placebo-Controlled Clinical Trial. *Archives of Physical Medicine and Rehabilitation* 2014;95(2):345-52.
64. Dejaco B, Habets B, van Loon C, van Grinsven S, van Cingel R. Eccentric versus conventional exercise therapy in patients with rotator cuff tendinopathy: a randomized, single blinded, clinical trial. *Knee surgery, sports traumatology, arthroscopy : official journal of the ESSKA* 2016 doi: 10.1007/s00167-016-4223-x.
65. Delgado-Gil JA, Prado-Robles E, Rodrigues-de-Souza DP, Cleland JA, Fernandez-de-Las-Penas C, Alburquerque-Sendin F. Effects of Mobilization With Movement on Pain and Range of Motion in Patients With Unilateral Shoulder Impingement Syndrome: A Randomized Controlled Trial. *Journal of manipulative and physiological therapeutics* 2015 doi: 10.1016/j.jmpt.2014.12.008.

66. Devereaux M, Velanoski KQ, Pennings A, Elmaraghy A. Short-Term Effectiveness of Precut Kinesiology Tape Versus an NSAID as Adjuvant Treatment to Exercise for Subacromial Impingement: A Randomized Controlled Trial. *Clinical journal of sport medicine : official journal of the Canadian Academy of Sport Medicine* 2015 doi: 10.1097/jsm.0000000000000187.
67. di Lorenzo L, Pappagallo M, Gimigliano R, et al. Pain relief in early rehabilitation of rotator cuff tendinitis: any role for indirect suprascapular nerve block? *Europa Medicophysica [Mediterranean Journal of Physical and Rehabilitation Medicine]* 2006 Sep;42(3):195-204 2006.
68. Dickens VA, Williams JL, Bhamra MS. Role of physiotherapy in the treatment of subacromial impingement syndrome: a prospective study. *Physiotherapy* 2005 Sep;91(3):159-164 2005.
69. Dilek B, Gulbahar S, Gundogdu M, et al. Efficacy of Proprioceptive Exercises in Patients with Subacromial Impingement Syndrome: A Single-Blinded Randomized Controlled Study. *American journal of physical medicine & rehabilitation / Association of Academic Physiatrists* 2015 doi: 10.1097/phm.0000000000000327.
70. Djordjevic OC, Vukicevic D, Katunac L, Jovic S. Mobilization with movement and kinesiotope compared with a supervised exercise program for painful shoulder: results of a clinical trial [with consumer summary]. *Journal of Manipulative and Physiological Therapeutics* 2012 Jul;35(6):454-463 2012.
71. Dogan SK, Ay S, Evcik D. The effectiveness of low laser therapy in subacromial impingement syndrome: a randomized placebo controlled double-blind prospective study. *Clinics (Sao Paulo, Brazil)* 2010;65(10):1019-22.
72. Dogu B, Yucel SD, Sag SY, Bankaoglu M, Kuran B. Blind or ultrasound-guided corticosteroid injections and short-term response in subacromial impingement syndrome: a randomized, double-blind, prospective study. *American journal of physical medicine & rehabilitation / Association of Academic Physiatrists* 2012;91(8):658-65 doi: 10.1097/PHM.0b013e318255978a.
73. Ekeberg OM, Bautz-Holter E, Tveitå EK, Juel NG, Kvalheim S, Brox JI. Subacromial ultrasound guided or systemic steroid injection for rotator cuff disease: randomised double blind study. *BMJ (Clinical research ed.)* 2009; 338.
74. Engebretsen K, Grotle M, Bautz-Holter E, et al. Radial extracorporeal shockwave treatment compared with supervised exercises in patients with subacromial pain syndrome: single blind randomised study [with consumer summary]. *BMJ* 2009 Sep 15;339:b3360 2009.
75. Engebretsen K, Grotle M, Bautz-Holter E, Ekeberg OM, Juel NG, Brox JI. Supervised exercises compared with radial extracorporeal shock-wave therapy for subacromial shoulder pain: 1-year results of a single-blind randomized controlled trial. *Phys Ther* 2011;91(1):37-47 doi: 10.2522/ptj.20090338.
76. England S, Farrell AJ, Coppock JS, Struthers G, Bacon PA. Low power laser therapy of shoulder tendonitis. *Scandinavian Journal of Rheumatology* 1989;18(6):427-431 1989.
77. Eslamian F, Shakouri SK, Ghojzadeh M, Nobari OE, Eftekharsadat B. Effects of low-level laser therapy in combination with physiotherapy in the management of rotator cuff tendinitis. *Lasers in medical science* 2012;27(5):951-8 doi: 10.1007/s10103-011-1001-3.
78. Eyigor C, Eyigor S, Kivilcim KO. Are intra-articular corticosteroid injections better than conventional TENS in treatment of rotator cuff tendinitis in the short run? A randomized study. *European journal of physical & rehabilitation medicine.* 2010;46(3):315-24.
79. Farfaras S, Sernert N, Hallstrom E, Kartus J. Comparison of open acromioplasty, arthroscopic acromioplasty and physiotherapy in patients with subacromial impingement syndrome: a prospective randomised study. *Knee surgery, sports traumatology, arthroscopy : official journal of the ESSKA* 2014 doi: 10.1007/s00167-014-3416-4.
80. Galasso O, Amelio E, Riccelli D, Gasparini G. Short-term outcomes of extracorporeal shock wave therapy for the treatment of chronic non-calcific tendinopathy of the supraspinatus: a double-blind, randomized, placebo-controlled trial. *BMC Musculoskeletal Disorders* 2012;13(86).
81. Garcia I, Lobo C, Lopez E, Servan JL, Tenias JM. Comparative effectiveness of ultrasonophoresis and iontophoresis in impingement syndrome: A double-blind, randomized, placebo controlled trial. *Clin Rehabil* 2015 doi: 10.1177/0269215515578293.
82. Gialanella B, Prometti P. Effects of corticosteroids injection in rotator cuff tears. *Pain Medicine* 2011;12(10):1559-65.

83. Giombini A, di Cesare A, Safran MR, Ciatti R, Maffulli N. Short-term effectiveness of hyperthermia for supraspinatus tendinopathy in athletes: a short-term randomized controlled study. *The American Journal of Sports Medicine* 2006 Aug;34(8):1247-1253 2006.
84. Goksu H, Tuncay F, Borman P. The comparative efficacy of kinesio taping and local injection therapy in patients with subacromial impingement syndrome. *Clinical and experimental rheumatology* 2014; 32(4 suppl. 83).
85. Granviken F, Vasseljen O. Home exercises and supervised exercises are similarly effective for people with subacromial impingement: a randomised trial. *Journal of physiotherapy* 2015;61(3):135-41 doi: 10.1016/j.jphys.2015.05.014.
86. Guimaraes JF, Salvini TF, Siqueira AL, Jr., Ribeiro IL, Camargo PR, Albuquerque-Sendin F. Immediate Effects of Mobilization With Movement vs Sham Technique on Range of Motion, Strength, and Function in Patients With Shoulder Impingement Syndrome: Randomized Clinical Trial. *Journal of manipulative and physiological therapeutics* 2016;39(9):605-15 doi: 10.1016/j.jmpt.2016.08.001.
87. Guler H, Turhanoglu AD, Inanoglu K, Inanoglu D, Ozer C. Comparison of ketoprofen phonophoresis with ketoprofen and lidocaine-prilocaine phonophoresis in patients with subacromial impingement syndrome. [Turkish]. *Turkish Journal of Rheumatology* 2009; 24(2).
88. Haahr JP, Ostergaard S, Dalsgaard J, et al. Exercises versus arthroscopic decompression in patients with subacromial impingement: a randomised, controlled study in 90 cases with a one year follow up. *Annals of the rheumatic diseases* 2005;64(5):760-4 doi: 10.1136/ard.2004.021188.
89. Haahr JP, Andersen JH. Exercises may be as efficient as subacromial decompression in patients with subacromial stage II impingement: 4- to 8-years' follow-up in a prospective, randomized study. *Scandinavian Journal of Rheumatology* 2006 May-Jun;35(3):224-228 2006.
90. Haake M, Sattler A, Gross MW, Schmitt J, Hildebrandt R, Muller HH. Vergleich der extrakorporalen stosswellentherapie (ESWT) mit der rotgenreizbestrahlung beim supraspinatussehnnensyndrom -- ein prospektiver randomisierter einfachblinder parallelgruppenvergleich (Comparison of extracorporeal shockwave therapy (ESWT) with roentgen irradiation in supraspinatus tendon syndrome -- a prospective randomized single-blind parallel group comparison) [German]. *Zeitschrift fur Orthopadie und Ihre Grenzgebiete* 2001 Sep-Oct;139(5):397-402 2001.
91. Haghghat S, Taheri P, Banimehdi M, Taghavi A. Effectiveness of Blind & Ultrasound Guided Corticosteroid Injection in Impingement Syndrome. *Global journal of health science* 2015; 8(7).
92. Haik MN, Albuquerque-Sendin F, Silva CZ, Siqueira-Junior AL, Ribeiro IL, Camargo PR. Scapular kinematics pre- and post-thoracic thrust manipulation in individuals with and without shoulder impingement symptoms: a randomized controlled study. *The Journal of orthopaedic and sports physical therapy* 2014;44(7):475-87 doi: 10.2519/jospt.2014.4760.
93. Heron SR, Woby SR, Thompson DP. Comparison of three types of exercise in the treatment of rotator cuff tendinopathy/shoulder impingement syndrome:a randomised control trial assessing. *Physiotherapy* 2016 Sep 21:Epub ahead of print 2016.
94. Holmgren T, Bjornsson Hallgren H, Oberg B, Adolfsson L, Johansson K. Effect of specific exercise strategy on need for surgery in patients with subacromial impingement syndrome: randomised controlled study.[Reprint in *Br J Sports Med.* 2013 Sep;47(14):908; PMID: 23973881]. *Bmj* 2012;344.
95. Hong JY, Yoon SH, Moon DJ, Kwack KS, Joen B, Lee HY. Comparison of High- and Low-Dose Corticosteroid in Subacromial Injection for Periarticular Shoulder Disorder: A Randomized, Triple-Blind, Placebo-Controlled Trial. *Archives of Physical Medicine and Rehabilitation* 2011;92(12):1951-60.
96. Hoyek N, Di Rienzo F, Collet C, Hoyek F, Guillot A. The therapeutic role of motor imagery on the functional rehabilitation of a stage II shoulder impingement syndrome. *Disabil Rehabil* 2014;36(13):1113-9 doi: 10.3109/09638288.2013.833309.
97. Jensen MP, Trudeau JJ, Radnovich R, Galer BS, Gammaitoni AR. The Pain Quality Response Profile of a Corticosteroid Injections and Heated Lidocaine/Tetracaine Patch in the Treatment of Shoulder Impingement Syndrome. *The Clinical journal of pain* 2014 doi: 10.1097/AJP.000000000000130.



98. Johansson KM, Adolfsson LE, Foldevi MOM. Effects of acupuncture versus ultrasound in patients with impingement syndrome: randomized clinical trial. *Physical Therapy* 2005 Jun;85(6):490-501 2005.
99. Johansson K, Bergstrom A, Schroder K, Foldevi M. Subacromial corticosteroid injection or acupuncture with home exercises when treating patients with subacromial impingement in primary care-a randomized clinical trial. *Family Practice* 2011;28(4):355-65.
100. Just H, Stelzer L. Wirksamkeit der manuelletherapie bei patienten mit schulterschmerzen: randomisierte kontrollierte studie (Effectiveness of manual therapy in patients with shoulder pain: randomised controlled trial) [German]. *Manuelle Therapie* 2009 Dec;13(5):212-218 2009.
101. Kachingwe AF, Phillips B, Sletten E, Plunkett SW. Comparison of manual therapy techniques with therapeutic exercise in the treatment of shoulder impingement: a randomized controlled pilot clinical trial. *The Journal of manual & manipulative therapy* 2008;16(4):238-47.
102. Karthikeyan S, Kwong H, Upadhyay P, Parsons N, Drew S, Griffin D. A double-blind randomised controlled study comparing subacromial injection of tenoxicam or methylprednisolone in patients with subacromial impingement. *Bone & Joint Journal* 2010;92(1):77-82.
103. Kassolik K, Andrzejewski W, Brzozowski M, et al. Comparison of massage based on the tensegrity principle and classic massage in treating chronic shoulder pain. *Journal of Manipulative and Physiological Therapeutics* 2013 Sep;36(7):418-427 2013.
104. Kaya E, Zinnuroglu M, Tugcu I. Kinesio taping compared to physical therapy modalities for the treatment of shoulder impingement syndrome. *Clinical rheumatology* 2011;30(2):201-7 doi: 10.1007/s10067-010-1475-6.
105. Kaya DO, Baltaci G, Toprak U, Atay AO. The clinical and sonographic effects of kinesiotaping and exercise in comparison with manual therapy and exercise for patients with subacromial impingement syndrome: a preliminary trial. *Journal of manipulative and physiological therapeutics* 2014;37(6):422-32 doi: 10.1016/j.jmpt.2014.03.004.
106. Kelle B, Kozanoglu E. Low-level laser and local corticosteroid injection in the treatment of subacromial impingement syndrome: a controlled clinical trial. *Clin Rehabil* 2014;28(8):762-71 doi: 10.1177/0269215514520772.
107. Kesikburun S, Tan AK, Yilmaz B, Yasar E, Yazicioglu K. Platelet-rich plasma injections in the treatment of chronic rotator cuff tendinopathy: a randomized controlled trial with 1-year follow-up. *The American journal of sports medicine* 2013;41(11):2609-16 doi: 10.1177/0363546513496542.
108. Ketola S, Lehtinen J, Arnala I, et al. Does arthroscopic acromioplasty provide any additional value in the treatment of shoulder impingement syndrome?: a two-year randomised controlled trial. *The Journal of bone and joint surgery. British volume* 2009;91(10):1326-34 doi: 10.1302/0301-620x.91b10.22094.
109. Ketola S, Lehtinen J, Rousi T, et al. No evidence of long-term benefits of arthroscopic acromioplasty in the treatment of shoulder impingement syndrome: Five-year results of a randomised controlled trial. *Bone & joint research* 2013;2(7):132-9 doi: 10.1302/2046-3758.27.2000163.
110. Kibar S, Konak HE, Evcik D, Ay S. Laser Acupuncture Treatment Improves Pain and Functional Status in Patients with Subacromial Impingement Syndrome: A Randomized, Double-Blind, Sham-Controlled Study. *Pain medicine (Malden, Mass.)* 2016 doi: 10.1093/pm/pnw197.
111. YS K, JY P, CS L, SJ L. Does hyaluronate injection work in shoulder disease in early stage? A multicenter, randomized, single blind and open comparative clinical study. *Journal of Shoulder & Elbow Surgery* 2012;21(6):722-7.
112. Kleinhenz J, Streitberger K, Windeler J, Güssbacher A, Mavridis G, Martin E. Randomised clinical trial comparing the effects of acupuncture and a newly designed placebo needle in rotator cuff tendinitis. *Pain* 1999; 83(2).
113. F K, E A, NS G, O O, A K, E A. Functional magnetic resonance imaging of the effects of low-frequency transcutaneous electrical nerve stimulation on central pain modulation: a double-blind, placebo-controlled trial. *Clinical Journal of Pain* 2012;28(7):581-8.
114. Kocyigit F, Acar M, Turkmen MB, Kose T, Guldane N, Kuyucu E. Kinesio taping or just taping in shoulder subacromial impingement syndrome? A randomized, double-blind, placebo-controlled trial. *Physiotherapy Theory and Practice* 2016 Oct;32(7):501-508 2016.

115. Krischak G, Gebhard F, Reichel H, et al. A prospective randomized controlled trial comparing occupational therapy with home-based exercises in conservative treatment of rotator cuff tears. *Journal of shoulder and elbow surgery / American Shoulder and Elbow Surgeons ... [et al.]* 2013;**22**(9):1173-9 doi: 10.1016/j.jse.2013.01.008.
116. TO K, RA dB, CH B. Physiotherapy in patients with clinical signs of shoulder impingement syndrome: a randomized controlled trial. *Journal of Rehabilitation Medicine* 2013;**45**(5):488-97.
117. Kromer TO, de Bie RA, Bastiaenen CH. Effectiveness of physiotherapy and costs in patients with clinical signs of shoulder impingement syndrome: One-year follow-up of a randomized controlled trial. *J Rehabil Med* 2014;**46**(10):1029-36 doi: 10.2340/16501977-1867.
118. Kurtais Gursel Y, Ulus Y, Bilgic A, Dincer G, van der Heijden GJ. Adding ultrasound in the management of soft tissue disorders of the shoulder: a randomized placebo-controlled trial. *Physical Therapy* 2004 Apr;**84**(4):336-343 2004.
119. JH L, SH L, SH S. Clinical effectiveness of botulinum toxin type B in the treatment of subacromial bursitis or shoulder impingement syndrome. *Clinical Journal of Pain* 2011;**27**(6):523-8.
120. Lewis JS, Wright C, Green A. Subacromial impingement syndrome: the effect of changing posture on shoulder range of movement. *The Journal of orthopaedic and sports physical therapy* 2005;**35**(2):72-87 doi: 10.2519/jospt.2005.35.2.72.
121. Lewis J, Sim J, Barlas P. Acupuncture and electro-acupuncture for people diagnosed with subacromial pain syndrome: A multicentre randomized trial. *European journal of pain (London, England)* 2017 doi: 10.1002/ejp.1001.
122. Littlewood C, Malliaras P, Mawson S, May S, Walters SJ. Self-managed loaded exercise versus usual physiotherapy treatment for rotator cuff tendinopathy: a pilot randomised controlled trial. *Physiotherapy* 2014;**100**(1):54-60 doi: 10.1016/j.physio.2013.06.001.
123. Littlewood C, Bateman M, Brown K, et al. A self-managed single exercise programme versus usual physiotherapy treatment for rotator cuff tendinopathy: a randomised controlled trial (the SELF study) [with consumer summary]. *Clinical Rehabilitation* 2015 Jul 9 2015:Epub ahead of print.
124. Lombardi I, Magri AG, Fleury AM, Da Silva AC, Natour J. Progressive resistance training in patients with shoulder impingement syndrome: a randomized controlled trial. *Arthritis Care & Research* 2008;**59**(5):615-22.
125. PM L, JD B. Effects of a home exercise programme on shoulder pain and functional status in construction workers. *Occupational & Environmental Medicine* 2003;**60**(11):841-9.
126. Maenhout AG, Mahieu NN, Muynck M, Wilde LF, Cools AM. Does adding heavy load eccentric training to rehabilitation of patients with unilateral subacromial impingement result in better outcome? A randomized, clinical trial. *Knee surgery, sports traumatology, arthroscopy* 2013; **21**(5).
127. Martins LV, Marziale MHP. Assessment of proprioceptive exercises in the treatment of rotator cuff disorders in nursing professionals: A randomized controlled clinical trial. *Brazilian Journal of Physical Therapy* 2012; **16**(6).
128. Marzetti E, Rabini A, Piccinini G, et al. Neurocognitive therapeutic exercise improves pain and function in patients with shoulder impingement syndrome: a single-blind randomized controlled clinical trial. *European journal of physical and rehabilitation medicine* 2014;**50**(3):255-64.
129. McClatchie L, Laprade J, Martin S, Jaglal SB, Richardson D, Agur A. Mobilizations of the asymptomatic cervical spine can reduce signs of shoulder dysfunction in adults. *Manual therapy* 2009; **14**(4).
130. Melchiorre D, Maresca M, Bracci R, et al. Muscle shortening manoeuvre reduces pain and functional impairment in shoulder impingement syndrome: clinical and ultrasonographic evidence. *Clinical and experimental rheumatology* 2014;**32**(1):5-10.
131. Melegati G, Tornese D, Bandi M. Effectiveness of extracorporeal shock wave therapy associated with kinesitherapy in the treatment of subacromial impingement: A randomised, controlled study. *Journal of Sports Traumatology and Related Research* 2000; **22**(2).
132. Miller P, Osmotherly P. Does scapula taping facilitate recovery for shoulder impingement symptoms? A pilot randomized controlled trial. *The Journal of manual & manipulative therapy* 2009;**17**(1):E6-e13.

133. Min KS, St Pierre P, Ryan PM, Marchant BG, Wilson CJ, Arrington ED. A double-blind randomized controlled trial comparing the effects of subacromial injection with corticosteroid versus NSAID in patients with shoulder impingement syndrome. *Journal of shoulder and elbow surgery / American Shoulder and Elbow Surgeons ... [et al.]* 2013;**22**(5):595-601 doi: 10.1016/j.jse.2012.08.026.
134. Moezy A, Sepehrifar S, Solaymani Dodaran M. The effects of scapular stabilization based exercise therapy on pain, posture, flexibility and shoulder mobility in patients with shoulder impingement syndrome: a controlled randomized clinical trial. *Medical journal of the Islamic Republic of Iran* 2014;**28**:87.
135. Moghtaderi A, Sajadiyeh S, Khosrawi S, Dehghan F, Bateni V. Effect of subacromial sodium hyaluronate injection on rotator cuff disease: A double-blind placebo-controlled clinical trial. *Advanced biomedical research* 2013;**2**:89 doi: 10.4103/2277-9175.122517.
136. Montes-Molina R, Prieto-Baquero A, Martinez-Rodriguez ME, Romojaro-Rodriguez AB, Gallego-Mendez V, Martinez-Ruiz F. Interferential laser therapy in the treatment of shoulder pain and disability from musculoskeletal pathologies: a randomised comparative study. *Physiotherapy* 2012 Jun;**98**(2):143-150 2012.
137. Moosmayer S, Lund G, Seljom U, et al. Comparison between surgery and physiotherapy in the treatment of small and medium-sized tears of the rotator cuff: a randomised controlled study of 103 patients with one-year follow-up. *Journal of Bone and Joint Surgery -- British Volume* 2010 Jan;**92**-B(1):83-91 2010.
138. Moosmayer S, Lund G, Seljom US, et al. Tendon Repair Compared with Physiotherapy in the Treatment of Rotator Cuff Tears: A Randomized Controlled Study in 103 Cases with a Five-Year Follow-up. *Journal of Bone & Joint Surgery, American Volume* 2014;**96**(18):1504-14 11p doi: 10.2106/JBJS.M.01393.
139. Mulligan EP, Huang M, Dickson T, Khazzam M. The Effect of Axioscapular and Rotator Cuff Exercise Training Sequence in Patients with Subacromial Impingement Syndrome: A Randomized Crossover Trial. *International journal of sports physical therapy* 2016;**11**(1):94-107.
140. Munday SL, Jones A, Brantingham JW, Globe G, Jensen M, Price JL. A randomized, single-blinded, placebo-controlled clinical trial to evaluate the efficacy of chiropractic shoulder girdle adjustment in the treatment of shoulder impingement syndrome. *Journal of the American Chiropractic Association* 2007 Aug;**44**(6):6-15 2007.
141. Naredo E, Cabero F, Beneyto P, et al. A randomized comparative study of short term response to blind injection versus sonographic-guided injection of local corticosteroids in patients with painful shoulder. *Journal of rheumatology* 2004; **31**(2).
142. Nykanen M. Pulsed ultrasound treatment of the painful shoulder a randomized, double-blind, placebo-controlled study. *Scandinavian Journal of Rehabilitation Medicine* 1995 Jun;**27**(2):105-108 1995.
143. Osteras H, Torstensen T, Osteras B. High-dosage medical exercise therapy in patients with long-term subacromial shoulder pain: a randomized controlled trial. *Physiotherapy Research International* 2010;**15**(4):232-42.
144. Otadi K, Hadian MR, Olyaei G, Jalaie S. The beneficial effects of adding low level laser to ultrasound and exercise in Iranian women with shoulder tendonitis: a randomized clinical trial. *Journal of Back and Musculoskeletal Rehabilitation* 2012;**25**(1):13-19 2012.
145. Ozgen M, Firat S, Sarsan A, Topuz O, Ardic F, Baydemir C. Short- and long-term results of clinical effectiveness of sodium hyaluronate injection in supraspinatus tendinitis. *Rheumatology international* 2012;**32**(1):137-44.
146. Paoloni JA, Appleyard RC, Nelson J, Murrell GA. Topical glyceryl trinitrate application in the treatment of chronic supraspinatus tendinopathy: a randomized, double-blinded, placebo-controlled clinical trial. *The American journal of sports medicine* 2005;**33**(6):806-13 doi: 10.1177/0363546504270998.
147. Park SI, Choi YK, Lee JH, Kim YM. Effects of shoulder stabilization exercise on pain and functional recovery of shoulder impingement syndrome patients. *Journal of physical therapy science* 2013;**25**(11):1359-62 doi: 10.1589/jpts.25.1359.

148. Pekyavas N, Baltaci G. Short-term effects of high-intensity laser therapy, manual therapy, and Kinesio taping in patients with subacromial impingement syndrome. *Lasers in medical science* 2016; 31(6).
149. Penning LI, Bie RA, Walenkamp GH. The effectiveness of injections of hyaluronic acid or corticosteroid in patients with subacromial impingement: a three-arm randomised controlled trial. *Journal of bone and joint surgery. British volume* 2012; 94(9).
150. Penning LI, de Bie RA, Walenkamp GH. Subacromial triamcinolone acetonide, hyaluronic acid and saline injections for shoulder pain an RCT investigating the effectiveness in the first days. *BMC Musculoskelet Disord* 2014;**15**(1):352 doi: 10.1186/1471-2474-15-352.
151. Perez-Merino L, Del Carmen Casajuana Brianso M, Alarcon GB, et al. Evaluation of the effectiveness of three physiotherapeutic treatments for subacromial impingement syndrome: a randomised clinical trial. *Physiotherapy* 2015 doi: 10.1016/j.physio.2015.01.010.
152. Peters G, Kohn D. Mittelfristige klinische resultate nach operativer versus konservativer behandlung des subakromialen Impingementsyndroms (Mid-term clinical results after surgical versus conservative treatment of subacromial impingement syndrome) [German]. *Der Unfallchirurg [The Accident Surgeon]* 1997 Aug;**100**(8):623-629 1997.
153. Petri M, Huffman SL, Waser G, Cui H, Snabes MC, Verburg KM. Celecoxib effectively treats patients with acute shoulder tendinitis/bursitis. *The Journal of rheumatology* 2004;**31**(8):1614-20.
154. Plafki C, Steffen R, Willburger RE, Wittenberg RH. Local anaesthetic injection with and without corticosteroids for subacromial impingement syndrome. *International orthopaedics* 2000;**24**(1):40-2.
155. Polimeni V, Panuccio A, Furfari P, et al. Preliminary study on the efficacy of various rehabilitation therapies for shoulder pain. *Europa medicophysica* 2003; 39(1).
156. Pons S, Gallardo C, Caballero J, Martinez T. [Transdermal nitroglycerin versus corticosteroid infiltration for rotator cuff tendinitis]. *Atencion primaria / Sociedad Espanola de Medicina de Familia y Comunitaria* 2001;**28**(7):452-5.
157. Rabini A, Piazzini DB, Bertolini C, et al. Effects of local microwave diathermy on shoulder pain and function in patients with rotator cuff tendinopathy in comparison to subacromial corticosteroid injections: a single-blind randomized trial. *The Journal of orthopaedic and sports physical therapy* 2012;**42**(4):363-70 doi: 10.2519/jospt.2012.3787.
158. Radnovich R, Trudeau J, Gammaitoni AR. A randomized clinical study of the heated lidocaine/tetracaine patch versus subacromial corticosteroid injection for the treatment of pain associated with shoulder impingement syndrome. *Journal of pain research* 2014;**7**:727-35 doi: 10.2147/JPR.S63118.
159. Rahme H, Solem-Bertoft E, Westerberg CE, Lundberg E, Sorensen S, Hilding S. The subacromial impingement syndrome. A study of results of treatment with special emphasis on predictive factors and pain-generating mechanisms. *Scandinavian journal of rehabilitation medicine* 1998;**30**(4):253-62.
160. Razavi M, Jansen GB. Effects of acupuncture and placebo TENS in addition to exercise in treatment of rotator cuff tendinitis. *Clin Rehabil* 2004;**18**(8):872-8.
161. Rha DW, Park GY, Kim YK, Kim MT, Lee SC. Comparison of the therapeutic effects of ultrasound-guided platelet-rich plasma injection and dry needling in rotator cuff disease: a randomized controlled trial. *Clin Rehabil* 2013;**27**(2):113-22 doi: 10.1177/0269215512448388.
162. Rhon DI, Boyles RB, Cleland JA. One-year outcome of subacromial corticosteroid injection compared with manual physical therapy for the management of the unilateral shoulder impingement syndrome: a pragmatic randomized trial. *Annals of internal medicine* 2014;**161**(3):161-9 doi: 10.7326/M13-2199.
163. Saeed A, Khan M, Morrissey S, Kane D, Fraser AD. Impact of outpatient clinic ultrasound imaging in the diagnosis and treatment for shoulder impingement: a randomized prospective study. *Rheumatology international* 2014;**34**(4):503-9 doi: 10.1007/s00296-013-2892-z.

164. Sahin Onat S, Bicer S, Sahin Z, Kucukali Turkyilmaz A, Kara M, Ozbudak Demir S. Effectiveness of Kinesiotaping and Subacromial Corticosteroid Injection in Shoulder Impingement Syndrome. *American journal of physical medicine & rehabilitation / Association of Academic Physiatrists* 2016;**95**(8):553-60 doi: 10.1097/phm.0000000000000492.
165. San Segundo R, Molins J, Valdés M, Fernández T. Tratamiento conservador del síndrome subacromial. *Ultrasonidos frente a placebo. Un ensayo clínico Rehabilitación (Madr)* 2008;**42**(2):61-6.
166. Santamato A, Solfrizzi V, Panza F, et al. Short-term effects of high-intensity laser therapy versus ultrasound therapy in the treatment of people with subacromial impingement syndrome: a randomized clinical trial [with consumer summary]. *Physical Therapy* 2009 Jul;**89**(7):643-652 2009.
167. Santamato A, Panza F, Notarnicola A, et al. Is Extracorporeal Shockwave Therapy Combined With Isokinetic Exercise More Effective Than Extracorporeal Shockwave Therapy Alone for Subacromial Impingement Syndrome? A Randomized Clinical Trial. *The Journal of orthopaedic and sports physical therapy* 2016;**46**(9):714-25 doi: 10.2519/jospt.2016.4629.
168. Saunders L. The efficacy of low-level laser therapy in supraspinatus tendinitis. *Clinical Rehabilitation* 1995 May;**9**(2):126-134 1995.
169. Saunders L. Laser versus ultrasound in the treatment of supraspinatus tendinosis: randomised controlled trial [with consumer summary]. *Physiotherapy* 2003 Jun;**89**(6):365-373 2003.
170. Schmitt J, Haake M, Tosch A, Hildebrand R, Deike B, Griss P. Low-energy extracorporeal shock-wave treatment (ESWT) for tendinitis of the supraspinatus. A prospective, randomised study. *Journal of Bone and Joint Surgery -- British Volume* 2001 Aug;**83**-B(6):873-876 2001.
171. Schmitt J, Tosch A, Hunerkopf M, Haake M. [Extracorporeal shockwave therapy (ESWT) as therapeutic option in supraspinatus tendon syndrome? One year results of a placebo controlled study]. *Der Orthopade* 2002;**31**(7):652-7.
172. Schofer MD, Hinrichs F, Peterlein CD, Arendt M, Schmitt J. High- versus low-energy extracorporeal shock wave therapy of rotator cuff tendinopathy: a prospective, randomised, controlled study. *Acta orthopaedica Belgica* 2009;**75**(4):452-8.
173. Senbursa G, Baltaci G, Atay A. Comparison of conservative treatment with and without manual physical therapy for patients with shoulder impingement syndrome: a prospective, randomized clinical trial. *Knee surgery, sports traumatology, arthroscopy : official journal of the ESSKA* 2007;**15**(7):915-21 doi: 10.1007/s00167-007-0288-x.
174. Şenbursa G, Baltaci G, Atay Ö A. The effectiveness of manual therapy in supraspinatus tendinopathy. *Acta orthopaedica et traumatologica turcica* 2011; 45(3).
175. Shakeri H, Keshavarz R, Arab AM, Ebrahimi I. Clinical effectiveness of kinesiological taping on pain and pain-free shoulder range of motion in patients with shoulder impingement syndrome: a randomized, double blinded, placebo-controlled trial. *International journal of sports physical therapy* 2013;**8**(6):800-10.
176. Shibata Y, Midorikawa K, Emoto G, Naito M. Clinical evaluation of sodium hyaluronate for the treatment of patients with rotator cuff tear. *Journal of Shoulder & Elbow Surgery* 2001;**10**(3):209-16.
177. Simsek HH, Balki S, Keklik SS, Ozturk H, Elden H. Does Kinesio taping in addition to exercise therapy improve the outcomes in subacromial impingement syndrome? A randomized, double-blind, controlled clinical trial. *Acta Orthop Traumatol Turc* 2013;**47**(2):104-10.
178. Speed CA, Richards C, Nichols D, et al. Extracorporeal shock-wave therapy for tendonitis of the rotator cuff: a double-blind, randomised, controlled trial. *Journal of Bone and Joint Surgery -- British Volume* 2002 May;**84**-B(4):509-512 2002.
179. Streitberger K. Acupuncture in the therapy of shoulder pain as an example of evidence- based medicine. [German]. *Deutsche Zeitschrift fur Akupunktur* 2000; 43(1).

180. Struyf F, Nijs J, Mollekens S, et al. Scapular-focused treatment in patients with shoulder impingement syndrome: a randomized clinical trial. *Clinical rheumatology* 2013;**32**(1):73-85 doi: 10.1007/s10067-012-2093-2.
181. Subasi V, Toktas H, Demirdal US, Turel A, Cakir T, Kavuncu V. Water-based versus land-based exercise program for the management of shoulder impingement syndrome. *Turkiye Fiziksel Tip ve Rehabilitasyon Dergisi* 2012; 58(2).
182. Subasi V, Cakir T, Arica Z, et al. Comparison of efficacy of kinesiological taping and subacromial injection therapy in subacromial impingement syndrome. *Clinical rheumatology* 2014 doi: 10.1007/s10067-014-2824-7.
183. Szczurko O, Cooley K, Mills EJ, Zhou Q, Perri D, Seely D. Naturopathic treatment of rotator cuff tendinitis among Canadian postal workers: a randomized controlled trial. *Arthritis and rheumatism* 2009;**61**(8):1037-45 doi: 10.1002/art.24675.
184. Thelen M, Dauber J, Stoneman P. The clinical efficacy of kinesiio tape for shoulder pain: a randomized, double blinded, clinical trial. *Journal of orthopaedic & sports physical therapy* 2008;**38**(7):389-95.
185. Valtonen EJ. Double Acting Betamethasone (Celestone Chronodose®) in the Treatment of Supraspinatus Tendinitis: A Comparison of Subacromial and Gluteal Single Injections with Placebo. *Journal of International Medical Research* 1978;**6**(6):463-67.
186. van Rensburg KJ, Atkins E. Does thoracic manipulation increase shoulder range of movement in patients with subacromial impingement syndrome? A pilot study. *International Musculoskeletal Medicine* 2012;**34**(3):101-07 doi: doi:10.1179/1753615412Y.0000000003.
187. Vecchio P, Cave M, King V, Adebajo AO, Smith M, Hazleman BL. A double-blind study of the effectiveness of low level laser treatment of rotator cuff tendinitis. *British journal of rheumatology* 1993; 32(8).
188. Vecchio P, Hazleman B, King R. A double-blind trial comparing subacromial methylprednisolone and lignocaine in acute rotator cuff tendinitis. *British Journal of Rheumatology* 1993;**32**(8):743-5.
189. Vecchio PC, Adebajo AO, Hazleman BL. Suprascapular nerve block for persistent rotator cuff lesions. *Journal of rheumatology* 1993; 20(3).
190. Walther M, Werner A, Stahlschmidt T, Woelfel R, Gohlke F. The subacromial impingement syndrome of the shoulder treated by conventional physiotherapy, self-training, and a shoulder brace: results of a prospective, randomized study. *Journal of shoulder and elbow surgery / American Shoulder and Elbow Surgeons ... [et al.]* 2004;**13**(4):417-23 doi: 10.1016/s1058274604000485.
191. Watson J, Helliwell P, Morton V, et al. Shoulder acute pain in primary healthcare: is retraining effective for GP principals? SAPPHIRE--a randomized controlled trial. *Rheumatology (Oxford, England)* 2008;**47**(12):1795-802 doi: 10.1093/rheumatology/ken360.
192. Werner A, Walther M, Ilg A, Stahlschmidt T, Gohlke F. [Self-training versus conventional physiotherapy in subacromial impingement syndrome]. [German]. *Zeitschrift fur Orthopadie und Ihre Grenzgebiete* 2002;**140**(4):375-80.
193. White RH, Paull D, Fleming K. Rotator cuff tendinitis: comparison of subacromial injection of a long acting corticosteroid versus oral indomethacin therapy. *The Journal of rheumatology* 1986;**13**(3):608-13.
194. Wiener M, Mayer F. Auswirkungen von physiotherapie auf die maximale drehmomententwicklung und schmerzempfindung bei supraspinatustendinose (Effects of physiotherapy on peak torque and pain in patients with tendinitis of the supraspinatus muscle) [German]. *Deutsche Zeitschrift fur Sportmedizin* 2005;**56**(11):383-387 2005.
195. Wright A, Donaldson M, Wassinger C, Emerson-Kavchak A. Subacute effects of cervicothoracic spinal thrust/non-thrust in addition to shoulder manual therapy plus exercise intervention in individuals with subacromial impingement syndrome: a prospective, randomized controlled clinical trial pilot study. *Journal of manual & manipulative therapy* 2017.
196. Yavuz F, Duman I, Taskaynatan MA, Tan AK. Low-level laser therapy versus ultrasound therapy in the treatment of subacromial impingement syndrome: a randomized clinical trial. *Journal of back and musculoskeletal rehabilitation* 2014;**27**(3):315-20 doi: 10.3233/BMR-130450.

197. Yazmalar L, Sariyildiz MA, Batmaz I, et al. Efficiency of therapeutic ultrasound on pain, disability, anxiety, depression, sleep and quality of life in patients with subacromial impingement syndrome: A randomized controlled study. *Journal of back and musculoskeletal rehabilitation* 2016;**29**(4):801-07 doi: 10.3233/BMR-160692.
198. Yeldan I, Cetin E, Ozdincler A. The effectiveness of low-level laser therapy on shoulder function in subacromial impingement syndrome. *Disability and Rehabilitation* 2009;**31**(11):935-40 doi: 10.1080/09638280802377985.
199. Yildirim MA, Ones K, Celik EC. Comparison of ultrasound therapy of various durations in the treatment of subacromial impingement syndrome. *Journal of physical therapy science* 2013;**25**(9):1151-4 doi: 10.1589/jpts.25.1151.
200. Yilmaz C, Golpinar A, Oztuna V. The efficacy of subacromial corticosteroid injections in impingement syndrome. *Eklem Hastaliklari Ve Cerrahisi-Joint Diseases and Related Surgery* 2008;**19**(1):24-26.
